# Supplementary material for: Roles of DNA Methylation in Color Alternation of Eastern Honey Bees (Apis cerana) Induced by the Royal Jelly of Western Honey Bees (Apis mellifera)
Source: MDPI journal article supplement (doi:10.3390/ijms25063368), 2024-03-16
Supplement: s1 [file s1]

Table S1 High quality sequencing data of each sample

| Samples | Clean Reads Num | HQ Clean Reads Num(%) | Read Length | Adapter(%)     | Low Quality(%) | Poly A(%) | N(%)       |
|---------|-----------------|-----------------------|-------------|----------------|----------------|-----------|------------|
| CQ-1    | 44516892        | 44070934 (99.0%)      | 150/150     | 157096 (0.35%) | 288862 (0.65%) | 0 (0%)    | 0 (0.0%)   |
| CQ-2    | 50601692        | 50400762 (99.6%)      | 150/150     | 22592 (0.04%)  | 178338 (0.35%) | 0 (0%)    | 0 (0.0%)   |
| CQ-3    | 49541992        | 49262718 (99.44%)     | 150/150     | 27920 (0.06%)  | 251354 (0.51%) | 0 (0%)    | 0 (0.0%)   |
| NQ-1    | 59701346        | 59350214 (99.41%)     | 150/150     | 83644 (0.14%)  | 267338 (0.45%) | 0 (0%)    | 150 (0.0%) |
| NQ-2    | 44255848        | 43986432 (99.39%)     | 150/150     | 73990 (0.17%)  | 195332 (0.44%) | 0 (0%)    | 94 (0.0%)  |
| NQ-3    | 49021762        | 48804750 (99.56%)     | 150/150     | 31620 (0.06%)  | 185294 (0.38%) | 0 (0%)    | 98 (0.0%)  |
