# Supplementary material for: Roles of DNA Methylation in Color Alternation of Eastern Honey Bees (Apis cerana) Induced by the Royal Jelly of Western Honey Bees (Apis mellifera)
Source: MDPI journal article supplement (doi:10.3390/ijms25063368), 2024-03-16
Supplement: s1 [file s1]

Table S3 Average methylation levels of CG, CHG, and CHH in each sample

| Samples | C%   | CG % | CHG% | CHH% |
|---------|------|------|------|------|
| CQ-1    | 0.87 | 1.40 | 0.58 | 0.71 |
| CQ-2    | 0.87 | 1.38 | 0.59 | 0.70 |
| CQ-3    | 0.93 | 1.24 | 0.64 | 0.68 |
| NQ-1    | 0.76 | 1.17 | 0.56 | 0.61 |
| NQ-2    | 0.77 | 1.25 | 0.56 | 0.60 |
| NQ-3    | 0.82 | 1.39 | 0.57 | 0.63 |
