# Supplementary material for: Roles of DNA Methylation in Color Alternation of Eastern Honey Bees (Apis cerana) Induced by the Royal Jelly of Western Honey Bees (Apis mellifera)
Source: MDPI journal article supplement (doi:10.3390/ijms25063368), 2024-03-16
Supplement: s1 [file s1]

Table S2 Data mapped to the honeybee genome

| Samples | Total Reads | Mapped Reads | Mapped Ratio% | Genome Size | Sequence Depth |
|---------|-------------|--------------|---------------|-------------|----------------|
| CQ-1    | 44062202    | 30941071     | 70.22         | 214422117   | 21.64          |
| CQ-2    | 50400498    | 36733405     | 72.88         | 214422117   | 25.70          |
| CQ-3    | 49262244    | 34203016     | 69.43         | 214422117   | 23.93          |
| NQ-1    | 59349720    | 43176744     | 72.75         | 214422117   | 30.20          |
| NQ-2    | 43985428    | 31771053     | 72.23         | 214422117   | 22.23          |
| NQ-3    | 48804460    | 35490757     | 72.72         | 214422117   | 24.83          |
