# Supplementary material for: Roles of DNA Methylation in Color Alternation of Eastern Honey Bees (Apis cerana) Induced by the Royal Jelly of Western Honey Bees (Apis mellifera)
Source: Int J Mol Sci. 2024 Mar 16;25(6):3368. doi: 10.3390/ijms25063368 (PMC10969989; doi:10.3390/ijms25063368)
Supplement: Supplementary file 1 [file ijms-25-03368-s001.zip]

Archive with 12 entries (12 files):
- Figure S1.tif
- Figure S2.tif
- Figure S3.tif
- Figure S4.tif
- Table S1.pdf
- Table S2.pdf
- Table S3.pdf
- Table S4.xlsx
- Table S5.xlsx
- Table S6.xlsx
- Table S7.xlsx
- Table S8.xlsx
