# Supplementary material for: Roles of DNA Methylation in Color Alternation of Eastern Honey Bees (Apis cerana) Induced by the Royal Jelly of Western Honey Bees (Apis mellifera)
Source: Int J Mol Sci. 2024 Mar 16;25(6):3368. doi: 10.3390/ijms25063368 (PMC10969989; doi:10.3390/ijms25063368)
Supplement: Supplementary file 1 [file ijms-25-03368-s001.zip › Table S4.xlsx]

## Sheet: Table S4 
chr	start	end	strand	pvalue	qvalue	meth.diff	GeneID	position	Symbol	Description	KEGG_A_class	KEGG_B_class	Pathway	K_ID	GO Component	GO Function	GO Process
LG01	243701	243900	*	1.26e-17	1.21e-14	31.1162	g19	Genebody	RSPRY1	PBC30904.1 RING finger and SPRY domain-containing protein [Apis cerana cerana]	-	-	-	-	GO:0005575//cellular_component;GO:0005576//extracellular region	GO:0003674//molecular_function;GO:0005488//binding;GO:0005515//protein binding;GO:0043167//ion binding;GO:0043169//cation binding;GO:0046872//metal ion binding	-
LG01	974201	974400	*	1.81e-10	5.83e-08	-30.7779	g41	Genebody	REXO5	PBC25769.1 Putative RNA exonuclease NEF-sp [Apis cerana cerana]	Genetic Information Processing	Translation	ko03008//Ribosome biogenesis in eukaryotes	K14570	GO:0005575//cellular_component;GO:0005622//intracellular;GO:0005623//cell;GO:0005634//nucleus;GO:0005730//nucleolus;GO:0031974//membrane-enclosed lumen;GO:0031981//nuclear lumen;GO:0043226//organelle;GO:0043227//membrane-bounded organelle;GO:0043228//non-membrane-bounded organelle;GO:0043229//intracellular organelle;GO:0043231//intracellular membrane-bounded organelle;GO:0043232//intracellular no…	GO:0003674//molecular_function;GO:0003676//nucleic acid binding;GO:0003723//RNA binding;GO:0003824//catalytic activity;GO:0004518//nuclease activity;GO:0004527//exonuclease activity;GO:0005488//binding;GO:0016787//hydrolase activity;GO:0016788//hydrolase activity, acting on ester bonds;GO:0097159//organic cyclic compound binding;GO:1901363//heterocyclic compound binding	GO:0006139//nucleobase-containing compound metabolic process;GO:0006725//cellular aromatic compound metabolic process;GO:0006807//nitrogen compound metabolic process;GO:0008150//biological_process;GO:0008152//metabolic process;GO:0009987//cellular process;GO:0034641//cellular nitrogen compound metabolic process;GO:0043170//macromolecule metabolic process;GO:0044237//cellular metabolic process;GO:…
LG01	974301	974500	*	2.55e-32	1.45e-28	-46.879	g41	Genebody	REXO5	PBC25769.1 Putative RNA exonuclease NEF-sp [Apis cerana cerana]	Genetic Information Processing	Translation	ko03008//Ribosome biogenesis in eukaryotes	K14570	GO:0005575//cellular_component;GO:0005622//intracellular;GO:0005623//cell;GO:0005634//nucleus;GO:0005730//nucleolus;GO:0031974//membrane-enclosed lumen;GO:0031981//nuclear lumen;GO:0043226//organelle;GO:0043227//membrane-bounded organelle;GO:0043228//non-membrane-bounded organelle;GO:0043229//intracellular organelle;GO:0043231//intracellular membrane-bounded organelle;GO:0043232//intracellular no…	GO:0003674//molecular_function;GO:0003676//nucleic acid binding;GO:0003723//RNA binding;GO:0003824//catalytic activity;GO:0004518//nuclease activity;GO:0004527//exonuclease activity;GO:0005488//binding;GO:0016787//hydrolase activity;GO:0016788//hydrolase activity, acting on ester bonds;GO:0097159//organic cyclic compound binding;GO:1901363//heterocyclic compound binding	GO:0006139//nucleobase-containing compound metabolic process;GO:0006725//cellular aromatic compound metabolic process;GO:0006807//nitrogen compound metabolic process;GO:0008150//biological_process;GO:0008152//metabolic process;GO:0009987//cellular process;GO:0034641//cellular nitrogen compound metabolic process;GO:0043170//macromolecule metabolic process;GO:0044237//cellular metabolic process;GO:…
LG01	974401	974600	*	4.66e-08	9.31e-06	-25.1002	g41	Genebody	REXO5	PBC25769.1 Putative RNA exonuclease NEF-sp [Apis cerana cerana]	Genetic Information Processing	Translation	ko03008//Ribosome biogenesis in eukaryotes	K14570	GO:0005575//cellular_component;GO:0005622//intracellular;GO:0005623//cell;GO:0005634//nucleus;GO:0005730//nucleolus;GO:0031974//membrane-enclosed lumen;GO:0031981//nuclear lumen;GO:0043226//organelle;GO:0043227//membrane-bounded organelle;GO:0043228//non-membrane-bounded organelle;GO:0043229//intracellular organelle;GO:0043231//intracellular membrane-bounded organelle;GO:0043232//intracellular no…	GO:0003674//molecular_function;GO:0003676//nucleic acid binding;GO:0003723//RNA binding;GO:0003824//catalytic activity;GO:0004518//nuclease activity;GO:0004527//exonuclease activity;GO:0005488//binding;GO:0016787//hydrolase activity;GO:0016788//hydrolase activity, acting on ester bonds;GO:0097159//organic cyclic compound binding;GO:1901363//heterocyclic compound binding	GO:0006139//nucleobase-containing compound metabolic process;GO:0006725//cellular aromatic compound metabolic process;GO:0006807//nitrogen compound metabolic process;GO:0008150//biological_process;GO:0008152//metabolic process;GO:0009987//cellular process;GO:0034641//cellular nitrogen compound metabolic process;GO:0043170//macromolecule metabolic process;GO:0044237//cellular metabolic process;GO:…
LG01	1557501	1557700	*	8.72e-11	2.98e-08	-26.7983	g63	Genebody	lrk-1	XP_016904380.1 leucine-rich repeat serine/threonine-protein kinase 1 [Apis cerana]	-	-	-	-	GO:0000323//lytic vacuole;GO:0005575//cellular_component;GO:0005622//intracellular;GO:0005623//cell;GO:0005737//cytoplasm;GO:0005764//lysosome;GO:0005765//lysosomal membrane;GO:0005768//endosome;GO:0005770//late endosome;GO:0005773//vacuole;GO:0005774//vacuolar membrane;GO:0005794//Golgi apparatus;GO:0005795//Golgi stack;GO:0010008//endosome membrane;GO:0012505//endomembrane system;GO:0016020//me…	GO:0000166//nucleotide binding;GO:0001882//nucleoside binding;GO:0001883//purine nucleoside binding;GO:0003674//molecular_function;GO:0003824//catalytic activity;GO:0003924//GTPase activity;GO:0004672//protein kinase activity;GO:0004674//protein serine/threonine kinase activity;GO:0005488//binding;GO:0005515//protein binding;GO:0005524//ATP binding;GO:0005525//GTP binding;GO:0008144//drug binding…	GO:0000902//cell morphogenesis;GO:0000904//cell morphogenesis involved in differentiation;GO:0006464//cellular protein modification process;GO:0006468//protein phosphorylation;GO:0006793//phosphorus metabolic process;GO:0006796//phosphate-containing compound metabolic process;GO:0006807//nitrogen compound metabolic process;GO:0006810//transport;GO:0006897//endocytosis;GO:0006914//autophagy;GO:000…
LG01	1561001	1561200	*	1.51e-12	6.95e-10	27.635	g63	Genebody	lrk-1	XP_016904380.1 leucine-rich repeat serine/threonine-protein kinase 1 [Apis cerana]	-	-	-	-	GO:0000323//lytic vacuole;GO:0005575//cellular_component;GO:0005622//intracellular;GO:0005623//cell;GO:0005737//cytoplasm;GO:0005764//lysosome;GO:0005765//lysosomal membrane;GO:0005768//endosome;GO:0005770//late endosome;GO:0005773//vacuole;GO:0005774//vacuolar membrane;GO:0005794//Golgi apparatus;GO:0005795//Golgi stack;GO:0010008//endosome membrane;GO:0012505//endomembrane system;GO:0016020//me…	GO:0000166//nucleotide binding;GO:0001882//nucleoside binding;GO:0001883//purine nucleoside binding;GO:0003674//molecular_function;GO:0003824//catalytic activity;GO:0003924//GTPase activity;GO:0004672//protein kinase activity;GO:0004674//protein serine/threonine kinase activity;GO:0005488//binding;GO:0005515//protein binding;GO:0005524//ATP binding;GO:0005525//GTP binding;GO:0008144//drug binding…	GO:0000902//cell morphogenesis;GO:0000904//cell morphogenesis involved in differentiation;GO:0006464//cellular protein modification process;GO:0006468//protein phosphorylation;GO:0006793//phosphorus metabolic process;GO:0006796//phosphate-containing compound metabolic process;GO:0006807//nitrogen compound metabolic process;GO:0006810//transport;GO:0006897//endocytosis;GO:0006914//autophagy;GO:000…
LG01	1561401	1561600	*	2.59e-13	1.34e-10	32.4482	g63	Genebody	lrk-1	XP_016904380.1 leucine-rich repeat serine/threonine-protein kinase 1 [Apis cerana]	-	-	-	-	GO:0000323//lytic vacuole;GO:0005575//cellular_component;GO:0005622//intracellular;GO:0005623//cell;GO:0005737//cytoplasm;GO:0005764//lysosome;GO:0005765//lysosomal membrane;GO:0005768//endosome;GO:0005770//late endosome;GO:0005773//vacuole;GO:0005774//vacuolar membrane;GO:0005794//Golgi apparatus;GO:0005795//Golgi stack;GO:0010008//endosome membrane;GO:0012505//endomembrane system;GO:0016020//me…	GO:0000166//nucleotide binding;GO:0001882//nucleoside binding;GO:0001883//purine nucleoside binding;GO:0003674//molecular_function;GO:0003824//catalytic activity;GO:0003924//GTPase activity;GO:0004672//protein kinase activity;GO:0004674//protein serine/threonine kinase activity;GO:0005488//binding;GO:0005515//protein binding;GO:0005524//ATP binding;GO:0005525//GTP binding;GO:0008144//drug binding…	GO:0000902//cell morphogenesis;GO:0000904//cell morphogenesis involved in differentiation;GO:0006464//cellular protein modification process;GO:0006468//protein phosphorylation;GO:0006793//phosphorus metabolic process;GO:0006796//phosphate-containing compound metabolic process;GO:0006807//nitrogen compound metabolic process;GO:0006810//transport;GO:0006897//endocytosis;GO:0006914//autophagy;GO:000…
LG01	1670601	1670800	*	4.09e-17	3.68e-14	33.5611	g69	Genebody	Vps8	PBC25990.1 Vacuolar protein sorting-associated protein [Apis cerana cerana]	-	-	-	-	GO:0005575//cellular_component;GO:0005622//intracellular;GO:0005623//cell;GO:0005737//cytoplasm;GO:0005768//endosome;GO:0005769//early endosome;GO:0009279//cell outer membrane;GO:0012505//endomembrane system;GO:0031410//cytoplasmic vesicle;GO:0031982//vesicle;GO:0032991//macromolecular complex;GO:0033263//CORVET complex;GO:0043226//organelle;GO:0043227//membrane-bounded organelle;GO:0043229//intr…	GO:0003674//molecular_function;GO:0003950//NAD+ ADP-ribosyltransferase activity;GO:0005488//binding;GO:0005515//protein binding;GO:0008270//zinc ion binding;GO:0019899//enzyme binding;GO:0043167//ion binding;GO:0043169//cation binding;GO:0046872//metal ion binding;GO:0046914//transition metal ion binding;GO:0051020//GTPase binding	GO:0006471//protein ADP-ribosylation;GO:0006810//transport;GO:0006886//intracellular protein transport;GO:0006906//vesicle fusion;GO:0006996//organelle organization;GO:0007034//vacuolar transport;GO:0008104//protein localization;GO:0008150//biological_process;GO:0009987//cellular process;GO:0015031//protein transport;GO:0015833//peptide transport;GO:0016043//cellular component organization;GO:001…
LG01	1697501	1697700	*	6.66e-43	1.08e-38	29.8634	g73	Genebody	BTAF1	PBC25985.1 TATA-binding protein-associated factor [Apis cerana cerana]	-	-	-	-	GO:0000228//nuclear chromosome;GO:0005575//cellular_component;GO:0005622//intracellular;GO:0005623//cell;GO:0005634//nucleus;GO:0005694//chromosome;GO:0005737//cytoplasm;GO:0005739//mitochondrion;GO:0031974//membrane-enclosed lumen;GO:0031981//nuclear lumen;GO:0043226//organelle;GO:0043227//membrane-bounded organelle;GO:0043228//non-membrane-bounded organelle;GO:0043229//intracellular organelle;G…	GO:0000166//nucleotide binding;GO:0003674//molecular_function;GO:0003676//nucleic acid binding;GO:0003677//DNA binding;GO:0003678//DNA helicase activity;GO:0003824//catalytic activity;GO:0004003//ATP-dependent DNA helicase activity;GO:0004386//helicase activity;GO:0005488//binding;GO:0005515//protein binding;GO:0005524//ATP binding;GO:0008026//ATP-dependent helicase activity;GO:0008094//DNA-depen…	GO:0002225//positive regulation of antimicrobial peptide production;GO:0002376//immune system process;GO:0002682//regulation of immune system process;GO:0002684//positive regulation of immune system process;GO:0002697//regulation of immune effector process;GO:0002699//positive regulation of immune effector process;GO:0002700//regulation of production of molecular mediator of immune response;GO:00…
LG01	1943601	1943800	*	2e-09	5.29e-07	-25.4817	g83	Genebody	DNAJC16	XP_016904462.1 dnaJ homolog subfamily C member 16 [Apis cerana]	-	-	-	-	GO:0005575//cellular_component;GO:0005623//cell;GO:0005737//cytoplasm;GO:0016020//membrane;GO:0016021//integral component of membrane;GO:0031224//intrinsic component of membrane;GO:0044425//membrane part	GO:0003756//protein disulfide isomerase activity;GO:0005509//calcium ion binding;GO:0005515//protein binding;GO:0015036//disulfide oxidoreductase activity;GO:0016667//oxidoreductase activity, acting on a sulfur group of donors	GO:0006457//protein folding;GO:0006790//sulfur compound metabolic process;GO:0008150//biological_process;GO:0009408//response to heat;GO:0009987//cellular process;GO:0019725//cellular homeostasis;GO:0042592//homeostatic process;GO:0045454//cell redox homeostasis;GO:0050789//regulation of biological process;GO:0050794//regulation of cellular process;GO:0055114//oxidation-reduction process;GO:00650…
LG01	1944201	1944400	*	4.8e-17	4.28e-14	-28.913	g83	Genebody	DNAJC16	XP_016904462.1 dnaJ homolog subfamily C member 16 [Apis cerana]	-	-	-	-	GO:0005575//cellular_component;GO:0005623//cell;GO:0005737//cytoplasm;GO:0016020//membrane;GO:0016021//integral component of membrane;GO:0031224//intrinsic component of membrane;GO:0044425//membrane part	GO:0003756//protein disulfide isomerase activity;GO:0005509//calcium ion binding;GO:0005515//protein binding;GO:0015036//disulfide oxidoreductase activity;GO:0016667//oxidoreductase activity, acting on a sulfur group of donors	GO:0006457//protein folding;GO:0006790//sulfur compound metabolic process;GO:0008150//biological_process;GO:0009408//response to heat;GO:0009987//cellular process;GO:0019725//cellular homeostasis;GO:0042592//homeostatic process;GO:0045454//cell redox homeostasis;GO:0050789//regulation of biological process;GO:0050794//regulation of cellular process;GO:0055114//oxidation-reduction process;GO:00650…
LG01	2055301	2055500	*	5.66e-17	4.99e-14	-34.5593	g95	Genebody	gss	PBC30878.1 Glutathione synthetase [Apis cerana cerana]	Metabolism;Metabolism;Metabolism;Cellular Processes	Global and overview maps;Amino acid metabolism;Metabolism of other amino acids;Cell growth and death	ko01100//Metabolic pathways;ko00270//Cysteine and methionine metabolism;ko00480//Glutathione metabolism;ko04216//Ferroptosis	K21456;K21456;K21456;K21456	GO:0005575//cellular_component	GO:0003674//molecular_function;GO:0004363//glutathione synthase activity;GO:0005524//ATP binding	GO:0006750//glutathione biosynthetic process;GO:0008150//biological_process
LG01	2070001	2070200	*	4.2e-13	2.1e-10	28.8217	g99	Genebody	CG7766	PBC30874.1 phosphorylase b kinase regulatory subunit alpha [Apis cerana cerana]	-	-	-	-	GO:0005575//cellular_component;GO:0005622//intracellular;GO:0005623//cell;GO:0005737//cytoplasm;GO:0005964//phosphorylase kinase complex;GO:0032991//macromolecular complex;GO:0044424//intracellular part;GO:0044444//cytoplasmic part;GO:0044464//cell part;GO:0061695//transferase complex, transferring phosphorus-containing groups;GO:1902494//catalytic complex;GO:1902554//serine/threonine protein kin…	GO:0003674//molecular_function;GO:0003824//catalytic activity;GO:0005488//binding;GO:0005515//protein binding;GO:0005516//calmodulin binding	GO:0005975//carbohydrate metabolic process;GO:0005976//polysaccharide metabolic process;GO:0005977//glycogen metabolic process;GO:0006073//cellular glucan metabolic process;GO:0006091//generation of precursor metabolites and energy;GO:0006112//energy reserve metabolic process;GO:0006464//cellular protein modification process;GO:0006468//protein phosphorylation;GO:0006793//phosphorus metabolic pro…
LG01	2093501	2093700	*	2.13e-16	1.73e-13	-25.1021	g103	Genebody	Chc	XP_016904356.1 clathrin heavy chain [Apis cerana]	Human Diseases;Cellular Processes;Cellular Processes;Organismal Systems;Human Diseases;Organismal Systems	Neurodegenerative diseases;Transport and catabolism;Transport and catabolism;Nervous system;Infectious diseases;Excretory system	ko05016//Huntington disease;ko04144//Endocytosis;ko04142//Lysosome;ko04721//Synaptic vesicle cycle;ko05100//Bacterial invasion of epithelial cells;ko04961//Endocrine and other factor-regulated calcium reabsorption	K04646;K04646;K04646;K04646;K04646;K04646	GO:0000323//lytic vacuole;GO:0005575//cellular_component;GO:0005622//intracellular;GO:0005623//cell;GO:0005694//chromosome;GO:0005737//cytoplasm;GO:0005739//mitochondrion;GO:0005764//lysosome;GO:0005768//endosome;GO:0005773//vacuole;GO:0005794//Golgi apparatus;GO:0005798//Golgi-associated vesicle;GO:0005802//trans-Golgi network;GO:0005819//spindle;GO:0005829//cytosol;GO:0005856//cytoskeleton;GO:0…	GO:0002020//protease binding;GO:0003674//molecular_function;GO:0003676//nucleic acid binding;GO:0003723//RNA binding;GO:0003725//double-stranded RNA binding;GO:0005102//receptor binding;GO:0005198//structural molecule activity;GO:0005488//binding;GO:0005515//protein binding;GO:0008022//protein C-terminus binding;GO:0008092//cytoskeletal protein binding;GO:0019899//enzyme binding;GO:0019900//kinas…	GO:0000003//reproduction;GO:0000041//transition metal ion transport;GO:0000226//microtubule cytoskeleton organization;GO:0000278//mitotic cell cycle;GO:0000280//nuclear division;GO:0000281//mitotic cytokinesis;GO:0000578//embryonic axis specification;GO:0000910//cytokinesis;GO:0000912//assembly of actomyosin apparatus involved in cytokinesis;GO:0000915//actomyosin contractile ring assembly;GO:000…
LG01	2095201	2095400	*	2.93e-21	4.58e-18	-31.5465	g103	Genebody	Chc	XP_016904356.1 clathrin heavy chain [Apis cerana]	Human Diseases;Cellular Processes;Cellular Processes;Organismal Systems;Human Diseases;Organismal Systems	Neurodegenerative diseases;Transport and catabolism;Transport and catabolism;Nervous system;Infectious diseases;Excretory system	ko05016//Huntington disease;ko04144//Endocytosis;ko04142//Lysosome;ko04721//Synaptic vesicle cycle;ko05100//Bacterial invasion of epithelial cells;ko04961//Endocrine and other factor-regulated calcium reabsorption	K04646;K04646;K04646;K04646;K04646;K04646	GO:0000323//lytic vacuole;GO:0005575//cellular_component;GO:0005622//intracellular;GO:0005623//cell;GO:0005694//chromosome;GO:0005737//cytoplasm;GO:0005739//mitochondrion;GO:0005764//lysosome;GO:0005768//endosome;GO:0005773//vacuole;GO:0005794//Golgi apparatus;GO:0005798//Golgi-associated vesicle;GO:0005802//trans-Golgi network;GO:0005819//spindle;GO:0005829//cytosol;GO:0005856//cytoskeleton;GO:0…	GO:0002020//protease binding;GO:0003674//molecular_function;GO:0003676//nucleic acid binding;GO:0003723//RNA binding;GO:0003725//double-stranded RNA binding;GO:0005102//receptor binding;GO:0005198//structural molecule activity;GO:0005488//binding;GO:0005515//protein binding;GO:0008022//protein C-terminus binding;GO:0008092//cytoskeletal protein binding;GO:0019899//enzyme binding;GO:0019900//kinas…	GO:0000003//reproduction;GO:0000041//transition metal ion transport;GO:0000226//microtubule cytoskeleton organization;GO:0000278//mitotic cell cycle;GO:0000280//nuclear division;GO:0000281//mitotic cytokinesis;GO:0000578//embryonic axis specification;GO:0000910//cytokinesis;GO:0000912//assembly of actomyosin apparatus involved in cytokinesis;GO:0000915//actomyosin contractile ring assembly;GO:000…
LG01	4070201	4070400	*	2.15e-10	6.84e-08	-28.5749	g175	Genebody	Pgant7	XP_016907191.1 N-acetylgalactosaminyltransferase 7 [Apis cerana]	Metabolism;Metabolism;Metabolism	Global and overview maps;Glycan biosynthesis and metabolism;Glycan biosynthesis and metabolism	ko01100//Metabolic pathways;ko00514//Other types of O-glycan biosynthesis;ko00512//Mucin type O-glycan biosynthesis	K00710;K00710;K00710	GO:0000139//Golgi membrane;GO:0005575//cellular_component;GO:0005622//intracellular;GO:0005623//cell;GO:0005737//cytoplasm;GO:0005794//Golgi apparatus;GO:0005795//Golgi stack;GO:0012505//endomembrane system;GO:0016020//membrane;GO:0016021//integral component of membrane;GO:0031090//organelle membrane;GO:0031224//intrinsic component of membrane;GO:0031984//organelle subcompartment;GO:0043226//orga…	GO:0003674//molecular_function;GO:0003824//catalytic activity;GO:0004653//polypeptide N-acetylgalactosaminyltransferase activity;GO:0005488//binding;GO:0008194//UDP-glycosyltransferase activity;GO:0008375//acetylglucosaminyltransferase activity;GO:0008376//acetylgalactosaminyltransferase activity;GO:0016740//transferase activity;GO:0016757//transferase activity, transferring glycosyl groups;GO:00…	GO:0005975//carbohydrate metabolic process;GO:0006464//cellular protein modification process;GO:0006486//protein glycosylation;GO:0006493//protein O-linked glycosylation;GO:0006807//nitrogen compound metabolic process;GO:0008150//biological_process;GO:0008152//metabolic process;GO:0009058//biosynthetic process;GO:0009059//macromolecule biosynthetic process;GO:0009100//glycoprotein metabolic proce…
LG01	4207701	4207900	*	2.38e-12	1.05e-09	-27.2618	g198	Genebody	PHF12	XP_016907669.1 PHD finger protein 12 isoform X1 [Apis cerana]	-	-	-	-	GO:0000118//histone deacetylase complex;GO:0000228//nuclear chromosome;GO:0000785//chromatin;GO:0000790//nuclear chromatin;GO:0005575//cellular_component;GO:0005622//intracellular;GO:0005623//cell;GO:0005634//nucleus;GO:0005654//nucleoplasm;GO:0005694//chromosome;GO:0016580//Sin3 complex;GO:0017053//transcriptional repressor complex;GO:0031974//membrane-enclosed lumen;GO:0031981//nuclear lumen;GO…	GO:0000976//transcription regulatory region sequence-specific DNA binding;GO:0000977//RNA polymerase II regulatory region sequence-specific DNA binding;GO:0001012//RNA polymerase II regulatory region DNA binding;GO:0001067//regulatory region nucleic acid binding;GO:0001221//transcription cofactor binding;GO:0001222//transcription corepressor binding;GO:0003674//molecular_function;GO:0003676//nucl…	GO:0000122//negative regulation of transcription from RNA polymerase II promoter;GO:0006139//nucleobase-containing compound metabolic process;GO:0006275//regulation of DNA replication;GO:0006325//chromatin organization;GO:0006342//chromatin silencing;GO:0006351//transcription, DNA-templated;GO:0006354//DNA-templated transcription, elongation;GO:0006355//regulation of transcription, DNA-templated;…
LG01	4215401	4215600	*	2.28e-21	3.59e-18	-25.1794	g201	Genebody	NAA25	XP_016904776.1 N-alpha-acetyltransferase 25, NatB auxiliary subunit isoform X1 [Apis cerana]	-	-	-	-	GO:0000323//lytic vacuole;GO:0005575//cellular_component;GO:0005622//intracellular;GO:0005623//cell;GO:0005634//nucleus;GO:0005694//chromosome;GO:0005737//cytoplasm;GO:0005764//lysosome;GO:0005773//vacuole;GO:0005794//Golgi apparatus;GO:0005829//cytosol;GO:0012505//endomembrane system;GO:0030027//lamellipodium;GO:0030424//axon;GO:0030426//growth cone;GO:0030427//site of polarized growth;GO:003124…	GO:0003674//molecular_function;GO:0003779//actin binding;GO:0005215//transporter activity;GO:0005488//binding;GO:0005515//protein binding;GO:0008092//cytoskeletal protein binding;GO:0044877//macromolecular complex binding;GO:0046983//protein dimerization activity;GO:0051015//actin filament binding	GO:0000001//mitochondrion inheritance;GO:0000003//reproduction;GO:0000278//mitotic cell cycle;GO:0000281//mitotic cytokinesis;GO:0000902//cell morphogenesis;GO:0000904//cell morphogenesis involved in differentiation;GO:0000910//cytokinesis;GO:0000912//assembly of actomyosin apparatus involved in cytokinesis;GO:0000915//actomyosin contractile ring assembly;GO:0001667//ameboidal-type cell migration…
LG01	4387801	4388000	*	2.64e-13	1.37e-10	34.833	g213	Genebody	SMT	XP_016907697.1 selenocysteine Se-methyltransferase-like [Apis cerana]	Metabolism;Metabolism	Global and overview maps;Amino acid metabolism	ko01100//Metabolic pathways;ko00270//Cysteine and methionine metabolism	K00547;K00547	-	GO:0008705//methionine synthase activity	GO:0009086//methionine biosynthetic process
LG01	4387901	4388100	*	2.64e-13	1.37e-10	34.833	g213	Genebody	SMT	XP_016907697.1 selenocysteine Se-methyltransferase-like [Apis cerana]	Metabolism;Metabolism	Global and overview maps;Amino acid metabolism	ko01100//Metabolic pathways;ko00270//Cysteine and methionine metabolism	K00547;K00547	-	GO:0008705//methionine synthase activity	GO:0009086//methionine biosynthetic process
LG01	5601701	5601900	*	4e-09	9.94e-07	25.7293	g294	Genebody	me31B	PBC31773.1 Putative ATP-dependent RNA helicase me31b [Apis cerana cerana]	Genetic Information Processing	Folding, sorting and degradation	ko03018//RNA degradation	K12614	GO:0000785//chromatin;GO:0000792//heterochromatin;GO:0000932//cytoplasmic mRNA processing body;GO:0001520//outer dense fiber;GO:0005575//cellular_component;GO:0005622//intracellular;GO:0005623//cell;GO:0005634//nucleus;GO:0005694//chromosome;GO:0005730//nucleolus;GO:0005737//cytoplasm;GO:0005739//mitochondrion;GO:0005829//cytosol;GO:0005856//cytoskeleton;GO:0005911//cell-cell junction;GO:0005912/…	GO:0000166//nucleotide binding;GO:0003674//molecular_function;GO:0003676//nucleic acid binding;GO:0003682//chromatin binding;GO:0003690//double-stranded DNA binding;GO:0003723//RNA binding;GO:0003724//RNA helicase activity;GO:0003729//mRNA binding;GO:0003824//catalytic activity;GO:0004003//ATP-dependent DNA helicase activity;GO:0004004//ATP-dependent RNA helicase activity;GO:0004386//helicase act…	GO:0000003//reproduction;GO:0000288//nuclear-transcribed mRNA catabolic process, deadenylation-dependent decay;GO:0000290//deadenylation-dependent decapping of nuclear-transcribed mRNA;GO:0000291//nuclear-transcribed mRNA catabolic process, exonucleolytic;GO:0000956//nuclear-transcribed mRNA catabolic process;GO:0002064//epithelial cell development;GO:0002065//columnar/cuboidal epithelial cell di…
LG01	5950901	5951100	*	2.4e-25	5.89e-22	28.417	g308	Genebody	CEP350	XP_016907448.1 centrosome-associated protein 350 [Apis cerana]	-	-	-	-	GO:0005575//cellular_component;GO:0005622//intracellular;GO:0005623//cell;GO:0005634//nucleus;GO:0005737//cytoplasm;GO:0005813//centrosome;GO:0005814//centriole;GO:0005815//microtubule organizing center;GO:0005819//spindle;GO:0005856//cytoskeleton;GO:0015630//microtubule cytoskeleton;GO:0042995//cell projection;GO:0043226//organelle;GO:0043227//membrane-bounded organelle;GO:0043228//non-membrane-…	GO:0003674//molecular_function;GO:0005488//binding;GO:0005515//protein binding;GO:0008017//microtubule binding;GO:0008092//cytoskeletal protein binding;GO:0015631//tubulin binding	GO:0000226//microtubule cytoskeleton organization;GO:0006996//organelle organization;GO:0007010//cytoskeleton organization;GO:0007017//microtubule-based process;GO:0008150//biological_process;GO:0009987//cellular process;GO:0016043//cellular component organization;GO:0034453//microtubule anchoring;GO:0071840//cellular component organization or biogenesis
LG01	5954001	5954200	*	7.48e-50	2.23e-45	35.5796	g308	Genebody	CEP350	XP_016907448.1 centrosome-associated protein 350 [Apis cerana]	-	-	-	-	GO:0005575//cellular_component;GO:0005622//intracellular;GO:0005623//cell;GO:0005634//nucleus;GO:0005737//cytoplasm;GO:0005813//centrosome;GO:0005814//centriole;GO:0005815//microtubule organizing center;GO:0005819//spindle;GO:0005856//cytoskeleton;GO:0015630//microtubule cytoskeleton;GO:0042995//cell projection;GO:0043226//organelle;GO:0043227//membrane-bounded organelle;GO:0043228//non-membrane-…	GO:0003674//molecular_function;GO:0005488//binding;GO:0005515//protein binding;GO:0008017//microtubule binding;GO:0008092//cytoskeletal protein binding;GO:0015631//tubulin binding	GO:0000226//microtubule cytoskeleton organization;GO:0006996//organelle organization;GO:0007010//cytoskeleton organization;GO:0007017//microtubule-based process;GO:0008150//biological_process;GO:0009987//cellular process;GO:0016043//cellular component organization;GO:0034453//microtubule anchoring;GO:0071840//cellular component organization or biogenesis
LG01	6056701	6056900	*	1.61e-11	6.23e-09	-25.0759	g316	Genebody	lva	PBC31750.1 Protein lava lamp [Apis cerana cerana]	-	-	-	-	-	GO:0005524//ATP binding	GO:0007059//chromosome segregation;GO:0030261//chromosome condensation
LG01	6057101	6057300	*	8.21e-21	1.21e-17	34.3942	g316	Genebody	lva	PBC31750.1 Protein lava lamp [Apis cerana cerana]	-	-	-	-	-	GO:0005524//ATP binding	GO:0007059//chromosome segregation;GO:0030261//chromosome condensation
LG01	6057201	6057400	*	5.05e-31	2.4e-27	46.1978	g316	Genebody	lva	PBC31750.1 Protein lava lamp [Apis cerana cerana]	-	-	-	-	-	GO:0005524//ATP binding	GO:0007059//chromosome segregation;GO:0030261//chromosome condensation
LG01	7396801	7397000	*	9.9e-08	1.85e-05	26.3017	g384	Genebody	PIK3C2B	PBC30512.1 Phosphatidylinositol-4-phosphate 3-kinase C2 domain-containing subunit beta [Apis cerana cerana]	Metabolism;Environmental Information Processing;Metabolism	Global and overview maps;Signal transduction;Carbohydrate metabolism	ko01100//Metabolic pathways;ko04070//Phosphatidylinositol signaling system;ko00562//Inositol phosphate metabolism	K00923;K00923;K00923	GO:0001891//phagocytic cup;GO:0005575//cellular_component;GO:0005622//intracellular;GO:0005623//cell;GO:0005737//cytoplasm;GO:0005768//endosome;GO:0005886//plasma membrane;GO:0005942//phosphatidylinositol 3-kinase complex;GO:0010008//endosome membrane;GO:0012505//endomembrane system;GO:0012506//vesicle membrane;GO:0016020//membrane;GO:0019898//extrinsic component of membrane;GO:0030139//endocytic…	GO:0003674//molecular_function;GO:0003824//catalytic activity;GO:0005488//binding;GO:0005515//protein binding;GO:0005543//phospholipid binding;GO:0008289//lipid binding;GO:0016301//kinase activity;GO:0016303//1-phosphatidylinositol-3-kinase activity;GO:0016307//phosphatidylinositol phosphate kinase activity;GO:0016740//transferase activity;GO:0016772//transferase activity, transferring phosphorus…	GO:0002119//nematode larval development;GO:0002164//larval development;GO:0006629//lipid metabolic process;GO:0006644//phospholipid metabolic process;GO:0006650//glycerophospholipid metabolic process;GO:0006661//phosphatidylinositol biosynthetic process;GO:0006793//phosphorus metabolic process;GO:0006796//phosphate-containing compound metabolic process;GO:0006810//transport;GO:0006897//endocytosi…
LG01	7399701	7399900	*	4.65e-10	1.39e-07	26.2963	g384	Genebody	PIK3C2B	PBC30512.1 Phosphatidylinositol-4-phosphate 3-kinase C2 domain-containing subunit beta [Apis cerana cerana]	Metabolism;Environmental Information Processing;Metabolism	Global and overview maps;Signal transduction;Carbohydrate metabolism	ko01100//Metabolic pathways;ko04070//Phosphatidylinositol signaling system;ko00562//Inositol phosphate metabolism	K00923;K00923;K00923	GO:0001891//phagocytic cup;GO:0005575//cellular_component;GO:0005622//intracellular;GO:0005623//cell;GO:0005737//cytoplasm;GO:0005768//endosome;GO:0005886//plasma membrane;GO:0005942//phosphatidylinositol 3-kinase complex;GO:0010008//endosome membrane;GO:0012505//endomembrane system;GO:0012506//vesicle membrane;GO:0016020//membrane;GO:0019898//extrinsic component of membrane;GO:0030139//endocytic…	GO:0003674//molecular_function;GO:0003824//catalytic activity;GO:0005488//binding;GO:0005515//protein binding;GO:0005543//phospholipid binding;GO:0008289//lipid binding;GO:0016301//kinase activity;GO:0016303//1-phosphatidylinositol-3-kinase activity;GO:0016307//phosphatidylinositol phosphate kinase activity;GO:0016740//transferase activity;GO:0016772//transferase activity, transferring phosphorus…	GO:0002119//nematode larval development;GO:0002164//larval development;GO:0006629//lipid metabolic process;GO:0006644//phospholipid metabolic process;GO:0006650//glycerophospholipid metabolic process;GO:0006661//phosphatidylinositol biosynthetic process;GO:0006793//phosphorus metabolic process;GO:0006796//phosphate-containing compound metabolic process;GO:0006810//transport;GO:0006897//endocytosi…
LG01	10221701	10221900	*	7e-11	2.44e-08	33.5312	g496	Genebody	ago	PBC26222.1 F-box/WD repeat-containing protein [Apis cerana cerana]	Genetic Information Processing	Folding, sorting and degradation	ko04120//Ubiquitin mediated proteolysis	K10260	GO:0000151//ubiquitin ligase complex;GO:0005575//cellular_component;GO:0005622//intracellular;GO:0005623//cell;GO:0005634//nucleus;GO:0005654//nucleoplasm;GO:0005730//nucleolus;GO:0005737//cytoplasm;GO:0005739//mitochondrion;GO:0005783//endoplasmic reticulum;GO:0005794//Golgi apparatus;GO:0005829//cytosol;GO:0012505//endomembrane system;GO:0016020//membrane;GO:0016021//integral component of membr…	GO:0002020//protease binding;GO:0003674//molecular_function;GO:0003700//transcription factor activity, sequence-specific DNA binding;GO:0003824//catalytic activity;GO:0004842//ubiquitin-protein transferase activity;GO:0005488//binding;GO:0005515//protein binding;GO:0016740//transferase activity;GO:0019787//ubiquitin-like protein transferase activity;GO:0019899//enzyme binding;GO:0019900//kinase b…	GO:0000003//reproduction;GO:0000209//protein polyubiquitination;GO:0000819//sister chromatid segregation;GO:0000902//cell morphogenesis;GO:0000904//cell morphogenesis involved in differentiation;GO:0001568//blood vessel development;GO:0001570//vasculogenesis;GO:0001666//response to hypoxia;GO:0001763//morphogenesis of a branching structure;GO:0001932//regulation of protein phosphorylation;GO:0001…
LG01	10226101	10226300	*	4.08e-16	3.2e-13	-31.0273	g497	Genebody	Enox1	PBC26220.1 Ecto-NOX disulfide-thiol exchanger [Apis cerana cerana]	-	-	-	-	-	GO:0003674//molecular_function;GO:0003676//nucleic acid binding;GO:0003723//RNA binding;GO:0003729//mRNA binding;GO:0005488//binding;GO:0097159//organic cyclic compound binding;GO:1901363//heterocyclic compound binding	GO:0008380//RNA splicing
LG01	10260301	10260500	*	6.65e-08	1.28e-05	-25.4637	g502	Genebody	Ube4a	PBC26215.1 Ubiquitin conjugation factor E4 [Apis cerana cerana]	Genetic Information Processing	Folding, sorting and degradation	ko04120//Ubiquitin mediated proteolysis	K10596	GO:0000151//ubiquitin ligase complex;GO:0005575//cellular_component;GO:0005622//intracellular;GO:0005623//cell;GO:0005634//nucleus;GO:0005737//cytoplasm;GO:0032991//macromolecular complex;GO:0043226//organelle;GO:0043227//membrane-bounded organelle;GO:0043229//intracellular organelle;GO:0043231//intracellular membrane-bounded organelle;GO:0044424//intracellular part;GO:0044464//cell part;GO:19024…	GO:0003674//molecular_function;GO:0003824//catalytic activity;GO:0004842//ubiquitin-protein transferase activity;GO:0016740//transferase activity;GO:0019787//ubiquitin-like protein transferase activity;GO:0034450//ubiquitin-ubiquitin ligase activity;GO:0061630//ubiquitin protein ligase activity;GO:0061659//ubiquitin-like protein ligase activity	GO:0000209//protein polyubiquitination;GO:0006464//cellular protein modification process;GO:0006508//proteolysis;GO:0006511//ubiquitin-dependent protein catabolic process;GO:0006807//nitrogen compound metabolic process;GO:0006950//response to stress;GO:0008150//biological_process;GO:0008152//metabolic process;GO:0009056//catabolic process;GO:0009057//macromolecule catabolic process;GO:0009987//ce…
LG01	10302401	10302600	*	4.85e-26	1.32e-22	-25.5366	g509	Genebody	Pheta1	XP_003693483.1 sesquipedalian-1 [Apis florea]	-	-	-	-	GO:0005575//cellular_component;GO:0005622//intracellular;GO:0005623//cell;GO:0005737//cytoplasm;GO:0005768//endosome;GO:0005769//early endosome;GO:0005794//Golgi apparatus;GO:0005802//trans-Golgi network;GO:0005829//cytosol;GO:0012505//endomembrane system;GO:0030135//coated vesicle;GO:0030136//clathrin-coated vesicle;GO:0031410//cytoplasmic vesicle;GO:0031982//vesicle;GO:0031984//organelle subcom…	GO:0003674//molecular_function;GO:0005488//binding;GO:0005515//protein binding;GO:0042802//identical protein binding;GO:0042803//protein homodimerization activity;GO:0046983//protein dimerization activity	GO:0001881//receptor recycling;GO:0006810//transport;GO:0006996//organelle organization;GO:0007032//endosome organization;GO:0008150//biological_process;GO:0008152//metabolic process;GO:0009987//cellular process;GO:0010256//endomembrane system organization;GO:0016043//cellular component organization;GO:0016050//vesicle organization;GO:0016192//vesicle-mediated transport;GO:0016197//endosomal tran…
LG01	10308701	10308900	*	4.71e-09	1.15e-06	25.4046	g510	Genebody	Kiaa0100	PBC26208.1 hypothetical protein APICC_04776 [Apis cerana cerana]	-	-	-	-	GO:0005575//cellular_component;GO:0005576//extracellular region	GO:0003674//molecular_function	GO:0008150//biological_process
LG01	10326601	10326800	*	1.74e-29	7.02e-26	37.0327	g514	Genebody	DDR2	XP_016911630.1 discoidin domain-containing receptor 2 [Apis cerana]	-	-	-	-	-	GO:0004672//protein kinase activity;GO:0005524//ATP binding	GO:0006468//protein phosphorylation
LG01	10384501	10384700	*	6.62e-10	1.92e-07	27.2513	g522	Genebody	Ubr7	XP_006568686.1 putative E3 ubiquitin-protein ligase UBR7 [Apis mellifera]	-	-	-	-	-	GO:0003674//molecular_function;GO:0003824//catalytic activity;GO:0004842//ubiquitin-protein transferase activity;GO:0005488//binding;GO:0005524//ATP binding;GO:0008270//zinc ion binding;GO:0016740//transferase activity;GO:0019787//ubiquitin-like protein transferase activity;GO:0043167//ion binding;GO:0043169//cation binding;GO:0046872//metal ion binding;GO:0046914//transition metal ion binding;GO…	GO:0000070//mitotic sister chromatid segregation;GO:0000278//mitotic cell cycle;GO:0000280//nuclear division;GO:0000819//sister chromatid segregation;GO:0006464//cellular protein modification process;GO:0006807//nitrogen compound metabolic process;GO:0006996//organelle organization;GO:0007049//cell cycle;GO:0007059//chromosome segregation;GO:0008150//biological_process;GO:0008152//metabolic proce…
LG01	10403401	10403600	*	6.47e-29	2.46e-25	-31.5622	g527	Genebody	TRIO	PBC31735.1 Triple functional domain protein [Apis cerana cerana]	-	-	-	-	GO:0005575//cellular_component;GO:0005622//intracellular;GO:0005623//cell;GO:0005886//plasma membrane;GO:0009898//cytoplasmic side of plasma membrane;GO:0016020//membrane;GO:0019897//extrinsic component of plasma membrane;GO:0019898//extrinsic component of membrane;GO:0030424//axon;GO:0030426//growth cone;GO:0030427//site of polarized growth;GO:0031234//extrinsic component of cytoplasmic side of …	GO:0003674//molecular_function;GO:0004672//protein kinase activity;GO:0005085//guanyl-nucleotide exchange factor activity;GO:0005088//Ras guanyl-nucleotide exchange factor activity;GO:0005089//Rho guanyl-nucleotide exchange factor activity;GO:0005488//binding;GO:0005515//protein binding;GO:0005524//ATP binding;GO:0017016//Ras GTPase binding;GO:0017048//Rho GTPase binding;GO:0019899//enzyme bindin…	GO:0000902//cell morphogenesis;GO:0000904//cell morphogenesis involved in differentiation;GO:0002009//morphogenesis of an epithelium;GO:0002165//instar larval or pupal development;GO:0006468//protein phosphorylation;GO:0006928//movement of cell or subcellular component;GO:0006935//chemotaxis;GO:0006996//organelle organization;GO:0007010//cytoskeleton organization;GO:0007154//cell communication;GO…
LG01	10409001	10409200	*	2.5e-17	2.31e-14	-33.5311	g527	Genebody	TRIO	PBC31735.1 Triple functional domain protein [Apis cerana cerana]	-	-	-	-	GO:0005575//cellular_component;GO:0005622//intracellular;GO:0005623//cell;GO:0005886//plasma membrane;GO:0009898//cytoplasmic side of plasma membrane;GO:0016020//membrane;GO:0019897//extrinsic component of plasma membrane;GO:0019898//extrinsic component of membrane;GO:0030424//axon;GO:0030426//growth cone;GO:0030427//site of polarized growth;GO:0031234//extrinsic component of cytoplasmic side of …	GO:0003674//molecular_function;GO:0004672//protein kinase activity;GO:0005085//guanyl-nucleotide exchange factor activity;GO:0005088//Ras guanyl-nucleotide exchange factor activity;GO:0005089//Rho guanyl-nucleotide exchange factor activity;GO:0005488//binding;GO:0005515//protein binding;GO:0005524//ATP binding;GO:0017016//Ras GTPase binding;GO:0017048//Rho GTPase binding;GO:0019899//enzyme bindin…	GO:0000902//cell morphogenesis;GO:0000904//cell morphogenesis involved in differentiation;GO:0002009//morphogenesis of an epithelium;GO:0002165//instar larval or pupal development;GO:0006468//protein phosphorylation;GO:0006928//movement of cell or subcellular component;GO:0006935//chemotaxis;GO:0006996//organelle organization;GO:0007010//cytoskeleton organization;GO:0007154//cell communication;GO…
LG01	10409101	10409300	*	4.27e-20	5.69e-17	-41.5584	g527	Genebody	TRIO	PBC31735.1 Triple functional domain protein [Apis cerana cerana]	-	-	-	-	GO:0005575//cellular_component;GO:0005622//intracellular;GO:0005623//cell;GO:0005886//plasma membrane;GO:0009898//cytoplasmic side of plasma membrane;GO:0016020//membrane;GO:0019897//extrinsic component of plasma membrane;GO:0019898//extrinsic component of membrane;GO:0030424//axon;GO:0030426//growth cone;GO:0030427//site of polarized growth;GO:0031234//extrinsic component of cytoplasmic side of …	GO:0003674//molecular_function;GO:0004672//protein kinase activity;GO:0005085//guanyl-nucleotide exchange factor activity;GO:0005088//Ras guanyl-nucleotide exchange factor activity;GO:0005089//Rho guanyl-nucleotide exchange factor activity;GO:0005488//binding;GO:0005515//protein binding;GO:0005524//ATP binding;GO:0017016//Ras GTPase binding;GO:0017048//Rho GTPase binding;GO:0019899//enzyme bindin…	GO:0000902//cell morphogenesis;GO:0000904//cell morphogenesis involved in differentiation;GO:0002009//morphogenesis of an epithelium;GO:0002165//instar larval or pupal development;GO:0006468//protein phosphorylation;GO:0006928//movement of cell or subcellular component;GO:0006935//chemotaxis;GO:0006996//organelle organization;GO:0007010//cytoskeleton organization;GO:0007154//cell communication;GO…
LG01	10969601	10969800	*	1.56e-23	3.15e-20	-27.3439	g563	Genebody	Ptpn4	XP_016918589.1 tyrosine-protein phosphatase non-receptor type 4 isoform X1 [Apis cerana]	-	-	-	-	GO:0005575//cellular_component;GO:0005622//intracellular;GO:0005623//cell;GO:0005634//nucleus;GO:0005737//cytoplasm;GO:0005739//mitochondrion;GO:0005856//cytoskeleton;GO:0043226//organelle;GO:0043227//membrane-bounded organelle;GO:0043228//non-membrane-bounded organelle;GO:0043229//intracellular organelle;GO:0043231//intracellular membrane-bounded organelle;GO:0043232//intracellular non-membrane-…	GO:0003674//molecular_function;GO:0003824//catalytic activity;GO:0004721//phosphoprotein phosphatase activity;GO:0004725//protein tyrosine phosphatase activity;GO:0005488//binding;GO:0005515//protein binding;GO:0008092//cytoskeletal protein binding;GO:0016787//hydrolase activity;GO:0016788//hydrolase activity, acting on ester bonds;GO:0016791//phosphatase activity;GO:0042578//phosphoric ester hyd…	GO:0000902//cell morphogenesis;GO:0000904//cell morphogenesis involved in differentiation;GO:0006464//cellular protein modification process;GO:0006468//protein phosphorylation;GO:0006470//protein dephosphorylation;GO:0006508//proteolysis;GO:0006793//phosphorus metabolic process;GO:0006796//phosphate-containing compound metabolic process;GO:0006807//nitrogen compound metabolic process;GO:0006928//…
LG01	10971601	10971800	*	1.44e-09	3.91e-07	26.7329	g563	Genebody	Ptpn4	XP_016918589.1 tyrosine-protein phosphatase non-receptor type 4 isoform X1 [Apis cerana]	-	-	-	-	GO:0005575//cellular_component;GO:0005622//intracellular;GO:0005623//cell;GO:0005634//nucleus;GO:0005737//cytoplasm;GO:0005739//mitochondrion;GO:0005856//cytoskeleton;GO:0043226//organelle;GO:0043227//membrane-bounded organelle;GO:0043228//non-membrane-bounded organelle;GO:0043229//intracellular organelle;GO:0043231//intracellular membrane-bounded organelle;GO:0043232//intracellular non-membrane-…	GO:0003674//molecular_function;GO:0003824//catalytic activity;GO:0004721//phosphoprotein phosphatase activity;GO:0004725//protein tyrosine phosphatase activity;GO:0005488//binding;GO:0005515//protein binding;GO:0008092//cytoskeletal protein binding;GO:0016787//hydrolase activity;GO:0016788//hydrolase activity, acting on ester bonds;GO:0016791//phosphatase activity;GO:0042578//phosphoric ester hyd…	GO:0000902//cell morphogenesis;GO:0000904//cell morphogenesis involved in differentiation;GO:0006464//cellular protein modification process;GO:0006468//protein phosphorylation;GO:0006470//protein dephosphorylation;GO:0006508//proteolysis;GO:0006793//phosphorus metabolic process;GO:0006796//phosphate-containing compound metabolic process;GO:0006807//nitrogen compound metabolic process;GO:0006928//…
LG01	11076801	11077000	*	2.63e-28	9.37e-25	-30.174	g579	Genebody	Kdm4B	PBC34511.1 lysine-specific demethylase 4B [Apis cerana cerana]	-	-	-	-	GO:0005575//cellular_component;GO:0005622//intracellular;GO:0005623//cell;GO:0005634//nucleus;GO:0043226//organelle;GO:0043227//membrane-bounded organelle;GO:0043229//intracellular organelle;GO:0043231//intracellular membrane-bounded organelle;GO:0044424//intracellular part;GO:0044464//cell part	GO:0003674//molecular_function;GO:0003824//catalytic activity;GO:0005488//binding;GO:0016491//oxidoreductase activity;GO:0016705//oxidoreductase activity, acting on paired donors, with incorporation or reduction of molecular oxygen;GO:0016706//oxidoreductase activity, acting on paired donors, with incorporation or reduction of molecular oxygen, 2-oxoglutarate as one donor, and incorporation of on…	GO:0006139//nucleobase-containing compound metabolic process;GO:0006325//chromatin organization;GO:0006351//transcription, DNA-templated;GO:0006355//regulation of transcription, DNA-templated;GO:0006464//cellular protein modification process;GO:0006482//protein demethylation;GO:0006725//cellular aromatic compound metabolic process;GO:0006807//nitrogen compound metabolic process;GO:0006996//organe…
LG01	11076901	11077100	*	1.63e-24	3.65e-21	-26.3807	g579	Genebody	Kdm4B	PBC34511.1 lysine-specific demethylase 4B [Apis cerana cerana]	-	-	-	-	GO:0005575//cellular_component;GO:0005622//intracellular;GO:0005623//cell;GO:0005634//nucleus;GO:0043226//organelle;GO:0043227//membrane-bounded organelle;GO:0043229//intracellular organelle;GO:0043231//intracellular membrane-bounded organelle;GO:0044424//intracellular part;GO:0044464//cell part	GO:0003674//molecular_function;GO:0003824//catalytic activity;GO:0005488//binding;GO:0016491//oxidoreductase activity;GO:0016705//oxidoreductase activity, acting on paired donors, with incorporation or reduction of molecular oxygen;GO:0016706//oxidoreductase activity, acting on paired donors, with incorporation or reduction of molecular oxygen, 2-oxoglutarate as one donor, and incorporation of on…	GO:0006139//nucleobase-containing compound metabolic process;GO:0006325//chromatin organization;GO:0006351//transcription, DNA-templated;GO:0006355//regulation of transcription, DNA-templated;GO:0006464//cellular protein modification process;GO:0006482//protein demethylation;GO:0006725//cellular aromatic compound metabolic process;GO:0006807//nitrogen compound metabolic process;GO:0006996//organe…
LG01	11079501	11079700	*	3.85e-25	9.15e-22	-30.6381	g580	Genebody	KDM4A	PBC34511.1 lysine-specific demethylase 4B [Apis cerana cerana]	-	-	-	-	GO:0005575//cellular_component;GO:0005622//intracellular;GO:0005623//cell;GO:0005634//nucleus;GO:0043226//organelle;GO:0043227//membrane-bounded organelle;GO:0043229//intracellular organelle;GO:0043231//intracellular membrane-bounded organelle;GO:0044424//intracellular part;GO:0044464//cell part	GO:0000981//RNA polymerase II transcription factor activity, sequence-specific DNA binding;GO:0000982//transcription factor activity, RNA polymerase II core promoter proximal region sequence-specific binding;GO:0001078//transcriptional repressor activity, RNA polymerase II core promoter proximal region sequence-specific binding;GO:0001227//transcriptional repressor activity, RNA polymerase II tra…	GO:0000122//negative regulation of transcription from RNA polymerase II promoter;GO:0006139//nucleobase-containing compound metabolic process;GO:0006325//chromatin organization;GO:0006351//transcription, DNA-templated;GO:0006355//regulation of transcription, DNA-templated;GO:0006357//regulation of transcription from RNA polymerase II promoter;GO:0006464//cellular protein modification process;GO:0…
LG01	11150801	11151000	*	5.6e-24	1.18e-20	-29.4319	g587	Genebody	thbs1	PBC34502.1 Hemicentin-1 [Apis cerana cerana]	-	-	-	-	-	-	GO:0007165//signal transduction
LG01	11321901	11322100	*	3.61e-23	6.95e-20	-49.8859	g615	Genebody	Pex23	XP_016918522.1 tectonin beta-propeller repeat-containing protein isoform X1 [Apis cerana]	Human Diseases	Infectious diseases	ko05131//Shigellosis	K17988	GO:0000323//lytic vacuole;GO:0000421//autophagosome membrane;GO:0005575//cellular_component;GO:0005622//intracellular;GO:0005623//cell;GO:0005634//nucleus;GO:0005654//nucleoplasm;GO:0005737//cytoplasm;GO:0005764//lysosome;GO:0005765//lysosomal membrane;GO:0005773//vacuole;GO:0005774//vacuolar membrane;GO:0005776//autophagosome;GO:0016020//membrane;GO:0016021//integral component of membrane;GO:003…	GO:0003674//molecular_function;GO:0005488//binding;GO:0005543//phospholipid binding;GO:0008289//lipid binding;GO:0030246//carbohydrate binding;GO:0032266//phosphatidylinositol-3-phosphate binding;GO:0035091//phosphatidylinositol binding;GO:0043167//ion binding;GO:0043168//anion binding;GO:1901981//phosphatidylinositol phosphate binding	GO:0006914//autophagy;GO:0008150//biological_process;GO:0008152//metabolic process;GO:0009056//catabolic process;GO:0009987//cellular process;GO:0016043//cellular component organization;GO:0016236//macroautophagy;GO:0022411//cellular component disassembly;GO:0032984//macromolecular complex disassembly;GO:0043933//macromolecular complex subunit organization;GO:0044237//cellular metabolic process;G…
LG01	11322001	11322200	*	2.14e-25	5.26e-22	-39.1293	g615	Genebody	Pex23	XP_016918522.1 tectonin beta-propeller repeat-containing protein isoform X1 [Apis cerana]	Human Diseases	Infectious diseases	ko05131//Shigellosis	K17988	GO:0000323//lytic vacuole;GO:0000421//autophagosome membrane;GO:0005575//cellular_component;GO:0005622//intracellular;GO:0005623//cell;GO:0005634//nucleus;GO:0005654//nucleoplasm;GO:0005737//cytoplasm;GO:0005764//lysosome;GO:0005765//lysosomal membrane;GO:0005773//vacuole;GO:0005774//vacuolar membrane;GO:0005776//autophagosome;GO:0016020//membrane;GO:0016021//integral component of membrane;GO:003…	GO:0003674//molecular_function;GO:0005488//binding;GO:0005543//phospholipid binding;GO:0008289//lipid binding;GO:0030246//carbohydrate binding;GO:0032266//phosphatidylinositol-3-phosphate binding;GO:0035091//phosphatidylinositol binding;GO:0043167//ion binding;GO:0043168//anion binding;GO:1901981//phosphatidylinositol phosphate binding	GO:0006914//autophagy;GO:0008150//biological_process;GO:0008152//metabolic process;GO:0009056//catabolic process;GO:0009987//cellular process;GO:0016043//cellular component organization;GO:0016236//macroautophagy;GO:0022411//cellular component disassembly;GO:0032984//macromolecular complex disassembly;GO:0043933//macromolecular complex subunit organization;GO:0044237//cellular metabolic process;G…
LG01	11345201	11345400	*	6.7e-47	1.66e-42	25.8231	g618	Genebody	--	XP_016918246.1 uncharacterized protein LOC108001648 isoform X1 [Apis cerana]	-	-	-	-	GO:0005575//cellular_component;GO:0005622//intracellular;GO:0005623//cell;GO:0005634//nucleus;GO:0005694//chromosome;GO:0005700//polytene chromosome;GO:0005705//polytene chromosome interband;GO:0005813//centrosome;GO:0005815//microtubule organizing center;GO:0005819//spindle;GO:0005856//cytoskeleton;GO:0015630//microtubule cytoskeleton;GO:0043226//organelle;GO:0043227//membrane-bounded organelle;…	GO:0003674//molecular_function;GO:0005488//binding;GO:0005515//protein binding;GO:0042393//histone binding	GO:0000075//cell cycle checkpoint;GO:0000226//microtubule cytoskeleton organization;GO:0000278//mitotic cell cycle;GO:0006996//organelle organization;GO:0007010//cytoskeleton organization;GO:0007017//microtubule-based process;GO:0007049//cell cycle;GO:0007051//spindle organization;GO:0007052//mitotic spindle organization;GO:0007059//chromosome segregation;GO:0007088//regulation of mitotic nuclear…
LG01	11345301	11345500	*	1.64e-53	7.6e-49	26.8156	g618	Genebody	--	XP_016918246.1 uncharacterized protein LOC108001648 isoform X1 [Apis cerana]	-	-	-	-	GO:0005575//cellular_component;GO:0005622//intracellular;GO:0005623//cell;GO:0005634//nucleus;GO:0005694//chromosome;GO:0005700//polytene chromosome;GO:0005705//polytene chromosome interband;GO:0005813//centrosome;GO:0005815//microtubule organizing center;GO:0005819//spindle;GO:0005856//cytoskeleton;GO:0015630//microtubule cytoskeleton;GO:0043226//organelle;GO:0043227//membrane-bounded organelle;…	GO:0003674//molecular_function;GO:0005488//binding;GO:0005515//protein binding;GO:0042393//histone binding	GO:0000075//cell cycle checkpoint;GO:0000226//microtubule cytoskeleton organization;GO:0000278//mitotic cell cycle;GO:0006996//organelle organization;GO:0007010//cytoskeleton organization;GO:0007017//microtubule-based process;GO:0007049//cell cycle;GO:0007051//spindle organization;GO:0007052//mitotic spindle organization;GO:0007059//chromosome segregation;GO:0007088//regulation of mitotic nuclear…
LG01	11498301	11498500	*	8.46e-17	7.25e-14	-33.6842	g624	Genebody	ARHGEF10	XP_016918211.1 rho guanine nucleotide exchange factor 10-like protein isoform X2 [Apis cerana]	-	-	-	-	GO:0005575//cellular_component	GO:0003674//molecular_function;GO:0005085//guanyl-nucleotide exchange factor activity;GO:0005088//Ras guanyl-nucleotide exchange factor activity;GO:0005089//Rho guanyl-nucleotide exchange factor activity;GO:0005488//binding;GO:0005515//protein binding;GO:0008705//methionine synthase activity;GO:0017016//Ras GTPase binding;GO:0017048//Rho GTPase binding;GO:0019899//enzyme binding;GO:0031267//small…	GO:0002009//morphogenesis of an epithelium;GO:0002165//instar larval or pupal development;GO:0007275//multicellular organism development;GO:0007444//imaginal disc development;GO:0007478//leg disc morphogenesis;GO:0007480//imaginal disc-derived leg morphogenesis;GO:0007552//metamorphosis;GO:0007560//imaginal disc morphogenesis;GO:0008150//biological_process;GO:0009086//methionine biosynthetic proc…
LG01	11903701	11903900	*	7.37e-09	1.74e-06	-27.7399	g655	Genebody	AAEL013144	PBC26885.1 Eukaryotic translation initiation factor [Apis cerana cerana]	Genetic Information Processing	Translation	ko03013//RNA transport	K03246	GO:0000151//ubiquitin ligase complex;GO:0005575//cellular_component;GO:0005622//intracellular;GO:0005623//cell;GO:0005634//nucleus;GO:0005737//cytoplasm;GO:0005829//cytosol;GO:0005852//eukaryotic translation initiation factor 3 complex;GO:0010494//cytoplasmic stress granule;GO:0016282//eukaryotic 43S preinitiation complex;GO:0031461//cullin-RING ubiquitin ligase complex;GO:0031974//membrane-enclo…	GO:0003674//molecular_function;GO:0003676//nucleic acid binding;GO:0003723//RNA binding;GO:0003743//translation initiation factor activity;GO:0005488//binding;GO:0005515//protein binding;GO:0008135//translation factor activity, RNA binding;GO:0019899//enzyme binding;GO:0097159//organic cyclic compound binding;GO:1901363//heterocyclic compound binding	GO:0001525//angiogenesis;GO:0001568//blood vessel development;GO:0001732//formation of cytoplasmic translation initiation complex;GO:0001889//liver development;GO:0001944//vasculature development;GO:0002040//sprouting angiogenesis;GO:0002181//cytoplasmic translation;GO:0002183//cytoplasmic translational initiation;GO:0002188//translation reinitiation;GO:0006412//translation;GO:0006413//translatio…
LG01	11915901	11916100	*	1.41e-11	5.54e-09	27.5513	g657	Genebody	AFG3L2	PBC26887.1 AFG3 protein [Apis cerana cerana]	Human Diseases	Neurodegenerative disease	ko05017//Spinocerebellar ataxia	K08956	GO:0000502//proteasome complex;GO:0005575//cellular_component;GO:0005622//intracellular;GO:0005623//cell;GO:0005737//cytoplasm;GO:0005739//mitochondrion;GO:0005740//mitochondrial envelope;GO:0005743//mitochondrial inner membrane;GO:0005745//m-AAA complex;GO:0009368//endopeptidase Clp complex;GO:0009376//HslUV protease complex;GO:0009379//Holliday junction helicase complex;GO:0009507//chloroplast;…	GO:0000166//nucleotide binding;GO:0003674//molecular_function;GO:0003678//DNA helicase activity;GO:0003824//catalytic activity;GO:0004175//endopeptidase activity;GO:0004176//ATP-dependent peptidase activity;GO:0004222//metalloendopeptidase activity;GO:0004252//serine-type endopeptidase activity;GO:0005198//structural molecule activity;GO:0005488//binding;GO:0005515//protein binding;GO:0005524//AT…	GO:0000902//cell morphogenesis;GO:0000904//cell morphogenesis involved in differentiation;GO:0006281//DNA repair;GO:0006310//DNA recombination;GO:0006508//proteolysis;GO:0006807//nitrogen compound metabolic process;GO:0006810//transport;GO:0006811//ion transport;GO:0006812//cation transport;GO:0006816//calcium ion transport;GO:0006839//mitochondrial transport;GO:0006851//mitochondrial calcium ion…
LG01	13405901	13406100	*	7.45e-11	2.59e-08	26.3504	g699	Genebody	SLC24A3	PBC25184.1 Sodium/potassium/calcium exchanger [Apis cerana cerana]	Organismal Systems	Sensory system	ko04740//Olfactory transduction	K13752	GO:0005887//integral component of plasma membrane;GO:0016021//integral component of membrane	GO:0005432//calcium:sodium antiporter activity;GO:0015368//calcium:cation antiporter activity	GO:0006814//sodium ion transport;GO:0006816//calcium ion transport;GO:0006874//cellular calcium ion homeostasis;GO:0006883//cellular sodium ion homeostasis;GO:0055085//transmembrane transport
LG01	13406001	13406200	*	1.37e-19	1.7e-16	31.7078	g699	Genebody	SLC24A3	PBC25184.1 Sodium/potassium/calcium exchanger [Apis cerana cerana]	Organismal Systems	Sensory system	ko04740//Olfactory transduction	K13752	GO:0005887//integral component of plasma membrane;GO:0016021//integral component of membrane	GO:0005432//calcium:sodium antiporter activity;GO:0015368//calcium:cation antiporter activity	GO:0006814//sodium ion transport;GO:0006816//calcium ion transport;GO:0006874//cellular calcium ion homeostasis;GO:0006883//cellular sodium ion homeostasis;GO:0055085//transmembrane transport
LG01	13513301	13513500	*	2.12e-16	1.72e-13	36.5054	g710	Genebody	Arhgef7	XP_016906275.1 rho guanine nucleotide exchange factor 7 [Apis cerana]	Cellular Processes;Human Diseases	Cell motility;Infectious disease: bacterial	ko04810//Regulation of actin cytoskeleton;ko05135//Yersinia infection	K13710;K13710	GO:0005575//cellular_component;GO:0005622//intracellular;GO:0005623//cell;GO:0005672//transcription factor TFIIA complex;GO:0005737//cytoplasm;GO:0005911//cell-cell junction;GO:0005912//adherens junction;GO:0005913//cell-cell adherens junction;GO:0030054//cell junction;GO:0030055//cell-substrate junction;GO:0030056//hemidesmosome;GO:0031594//neuromuscular junction;GO:0043226//organelle;GO:0044424…	GO:0003674//molecular_function;GO:0003824//catalytic activity;GO:0005085//guanyl-nucleotide exchange factor activity;GO:0005088//Ras guanyl-nucleotide exchange factor activity;GO:0005089//Rho guanyl-nucleotide exchange factor activity;GO:0005198//structural molecule activity;GO:0005488//binding;GO:0005515//protein binding;GO:0016301//kinase activity;GO:0016740//transferase activity;GO:0016772//tr…	GO:0000003//reproduction;GO:0001764//neuron migration;GO:0003006//developmental process involved in reproduction;GO:0006367//transcription initiation from RNA polymerase II promoter;GO:0006793//phosphorus metabolic process;GO:0006796//phosphate-containing compound metabolic process;GO:0006928//movement of cell or subcellular component;GO:0007275//multicellular organism development;GO:0007399//ner…
LG01	13639901	13640100	*	3.48e-26	9.64e-23	-40.9408	g719	Genebody	Patl1	PBC33466.1 hypothetical protein APICC_06853 [Apis cerana cerana]	Genetic Information Processing	Folding, sorting and degradation	ko03018//RNA degradation	K12617	GO:0000775//chromosome, centromeric region;GO:0000776//kinetochore;GO:0000932//cytoplasmic mRNA processing body;GO:0005575//cellular_component;GO:0005622//intracellular;GO:0005623//cell;GO:0005634//nucleus;GO:0005654//nucleoplasm;GO:0005694//chromosome;GO:0005737//cytoplasm;GO:0005829//cytosol;GO:0005840//ribosome;GO:0010494//cytoplasmic stress granule;GO:0015935//small ribosomal subunit;GO:00166…	GO:0002151//G-quadruplex RNA binding;GO:0003674//molecular_function;GO:0003676//nucleic acid binding;GO:0003682//chromatin binding;GO:0003723//RNA binding;GO:0003727//single-stranded RNA binding;GO:0003729//mRNA binding;GO:0005488//binding;GO:0005515//protein binding;GO:0008187//poly-pyrimidine tract binding;GO:0008266//poly(U) RNA binding;GO:0030371//translation repressor activity;GO:0034046//po…	GO:0000288//nuclear-transcribed mRNA catabolic process, deadenylation-dependent decay;GO:0000290//deadenylation-dependent decapping of nuclear-transcribed mRNA;GO:0000291//nuclear-transcribed mRNA catabolic process, exonucleolytic;GO:0000956//nuclear-transcribed mRNA catabolic process;GO:0001731//formation of translation preinitiation complex;GO:0002181//cytoplasmic translation;GO:0002183//cytopl…
LG01	13640001	13640200	*	9.91e-18	9.64e-15	-28.9284	g719	Genebody	Patl1	PBC33466.1 hypothetical protein APICC_06853 [Apis cerana cerana]	Genetic Information Processing	Folding, sorting and degradation	ko03018//RNA degradation	K12617	GO:0000775//chromosome, centromeric region;GO:0000776//kinetochore;GO:0000932//cytoplasmic mRNA processing body;GO:0005575//cellular_component;GO:0005622//intracellular;GO:0005623//cell;GO:0005634//nucleus;GO:0005654//nucleoplasm;GO:0005694//chromosome;GO:0005737//cytoplasm;GO:0005829//cytosol;GO:0005840//ribosome;GO:0010494//cytoplasmic stress granule;GO:0015935//small ribosomal subunit;GO:00166…	GO:0002151//G-quadruplex RNA binding;GO:0003674//molecular_function;GO:0003676//nucleic acid binding;GO:0003682//chromatin binding;GO:0003723//RNA binding;GO:0003727//single-stranded RNA binding;GO:0003729//mRNA binding;GO:0005488//binding;GO:0005515//protein binding;GO:0008187//poly-pyrimidine tract binding;GO:0008266//poly(U) RNA binding;GO:0030371//translation repressor activity;GO:0034046//po…	GO:0000288//nuclear-transcribed mRNA catabolic process, deadenylation-dependent decay;GO:0000290//deadenylation-dependent decapping of nuclear-transcribed mRNA;GO:0000291//nuclear-transcribed mRNA catabolic process, exonucleolytic;GO:0000956//nuclear-transcribed mRNA catabolic process;GO:0001731//formation of translation preinitiation complex;GO:0002181//cytoplasmic translation;GO:0002183//cytopl…
LG01	13719001	13719200	*	1.62e-42	2.49e-38	40.5714	g728	Genebody	FANCM	PBC33457.1 Fanconi anemia group M protein [Apis cerana cerana]	-	-	-	-	GO:0000781//chromosome, telomeric region;GO:0005575//cellular_component;GO:0005622//intracellular;GO:0005623//cell;GO:0005634//nucleus;GO:0005654//nucleoplasm;GO:0005694//chromosome;GO:0009380//excinuclease repair complex;GO:0016020//membrane;GO:0031974//membrane-enclosed lumen;GO:0031981//nuclear lumen;GO:0032991//macromolecular complex;GO:0043226//organelle;GO:0043227//membrane-bounded organell…	GO:0000166//nucleotide binding;GO:0003674//molecular_function;GO:0003676//nucleic acid binding;GO:0003677//DNA binding;GO:0003678//DNA helicase activity;GO:0003682//chromatin binding;GO:0003690//double-stranded DNA binding;GO:0003824//catalytic activity;GO:0004003//ATP-dependent DNA helicase activity;GO:0004386//helicase activity;GO:0004518//nuclease activity;GO:0004984//olfactory receptor activi…	GO:0000003//reproduction;GO:0000018//regulation of DNA recombination;GO:0000019//regulation of mitotic recombination;GO:0000280//nuclear division;GO:0000712//resolution of meiotic recombination intermediates;GO:0000724//double-strand break repair via homologous recombination;GO:0000725//recombinational repair;GO:0003006//developmental process involved in reproduction;GO:0006139//nucleobase-contai…
LG01	13719101	13719300	*	3.39e-48	8.9e-44	53.2202	g728	Genebody	FANCM	PBC33457.1 Fanconi anemia group M protein [Apis cerana cerana]	-	-	-	-	GO:0000781//chromosome, telomeric region;GO:0005575//cellular_component;GO:0005622//intracellular;GO:0005623//cell;GO:0005634//nucleus;GO:0005654//nucleoplasm;GO:0005694//chromosome;GO:0009380//excinuclease repair complex;GO:0016020//membrane;GO:0031974//membrane-enclosed lumen;GO:0031981//nuclear lumen;GO:0032991//macromolecular complex;GO:0043226//organelle;GO:0043227//membrane-bounded organell…	GO:0000166//nucleotide binding;GO:0003674//molecular_function;GO:0003676//nucleic acid binding;GO:0003677//DNA binding;GO:0003678//DNA helicase activity;GO:0003682//chromatin binding;GO:0003690//double-stranded DNA binding;GO:0003824//catalytic activity;GO:0004003//ATP-dependent DNA helicase activity;GO:0004386//helicase activity;GO:0004518//nuclease activity;GO:0004984//olfactory receptor activi…	GO:0000003//reproduction;GO:0000018//regulation of DNA recombination;GO:0000019//regulation of mitotic recombination;GO:0000280//nuclear division;GO:0000712//resolution of meiotic recombination intermediates;GO:0000724//double-strand break repair via homologous recombination;GO:0000725//recombinational repair;GO:0003006//developmental process involved in reproduction;GO:0006139//nucleobase-contai…
LG01	13719401	13719600	*	3.79e-08	7.74e-06	26.8796	g728	Genebody	FANCM	PBC33457.1 Fanconi anemia group M protein [Apis cerana cerana]	-	-	-	-	GO:0000781//chromosome, telomeric region;GO:0005575//cellular_component;GO:0005622//intracellular;GO:0005623//cell;GO:0005634//nucleus;GO:0005654//nucleoplasm;GO:0005694//chromosome;GO:0009380//excinuclease repair complex;GO:0016020//membrane;GO:0031974//membrane-enclosed lumen;GO:0031981//nuclear lumen;GO:0032991//macromolecular complex;GO:0043226//organelle;GO:0043227//membrane-bounded organell…	GO:0000166//nucleotide binding;GO:0003674//molecular_function;GO:0003676//nucleic acid binding;GO:0003677//DNA binding;GO:0003678//DNA helicase activity;GO:0003682//chromatin binding;GO:0003690//double-stranded DNA binding;GO:0003824//catalytic activity;GO:0004003//ATP-dependent DNA helicase activity;GO:0004386//helicase activity;GO:0004518//nuclease activity;GO:0004984//olfactory receptor activi…	GO:0000003//reproduction;GO:0000018//regulation of DNA recombination;GO:0000019//regulation of mitotic recombination;GO:0000280//nuclear division;GO:0000712//resolution of meiotic recombination intermediates;GO:0000724//double-strand break repair via homologous recombination;GO:0000725//recombinational repair;GO:0003006//developmental process involved in reproduction;GO:0006139//nucleobase-contai…
LG01	14149701	14149900	*	8.63e-09	2.01e-06	-26.573	g749	Genebody	Dhc64C	PBC33436.1 Dynein heavy chain, cytoplasmic [Apis cerana cerana]	Human Diseases;Cellular Processes;Organismal Systems	Infectious diseases;Transport and catabolism;Excretory system	ko05132//Salmonella infection;ko04145//Phagosome;ko04962//Vasopressin-regulated water reabsorption	K10413;K10413;K10413	GO:0000235//astral microtubule;GO:0000323//lytic vacuole;GO:0000775//chromosome, centromeric region;GO:0000776//kinetochore;GO:0000922//spindle pole;GO:0002177//manchette;GO:0005575//cellular_component;GO:0005576//extracellular region;GO:0005622//intracellular;GO:0005623//cell;GO:0005634//nucleus;GO:0005635//nuclear envelope;GO:0005694//chromosome;GO:0005737//cytoplasm;GO:0005764//lysosome;GO:000…	GO:0000166//nucleotide binding;GO:0003674//molecular_function;GO:0003677//DNA binding;GO:0003723//RNA binding;GO:0003724//RNA helicase activity;GO:0003774//motor activity;GO:0003777//microtubule motor activity;GO:0003824//catalytic activity;GO:0005198//structural molecule activity;GO:0005488//binding;GO:0005515//protein binding;GO:0005524//ATP binding;GO:0008017//microtubule binding;GO:0008092//c…	GO:0000003//reproduction;GO:0000070//mitotic sister chromatid segregation;GO:0000086//G2/M transition of mitotic cell cycle;GO:0000226//microtubule cytoskeleton organization;GO:0000278//mitotic cell cycle;GO:0000280//nuclear division;GO:0000741//karyogamy;GO:0000742//karyogamy involved in conjugation with cellular fusion;GO:0000746//conjugation;GO:0000747//conjugation with cellular fusion;GO:0000…
LG01	14151201	14151400	*	6.13e-22	1.02e-18	34.0604	g749	Genebody	Dhc64C	PBC33436.1 Dynein heavy chain, cytoplasmic [Apis cerana cerana]	Human Diseases;Cellular Processes;Organismal Systems	Infectious diseases;Transport and catabolism;Excretory system	ko05132//Salmonella infection;ko04145//Phagosome;ko04962//Vasopressin-regulated water reabsorption	K10413;K10413;K10413	GO:0000235//astral microtubule;GO:0000323//lytic vacuole;GO:0000775//chromosome, centromeric region;GO:0000776//kinetochore;GO:0000922//spindle pole;GO:0002177//manchette;GO:0005575//cellular_component;GO:0005576//extracellular region;GO:0005622//intracellular;GO:0005623//cell;GO:0005634//nucleus;GO:0005635//nuclear envelope;GO:0005694//chromosome;GO:0005737//cytoplasm;GO:0005764//lysosome;GO:000…	GO:0000166//nucleotide binding;GO:0003674//molecular_function;GO:0003677//DNA binding;GO:0003723//RNA binding;GO:0003724//RNA helicase activity;GO:0003774//motor activity;GO:0003777//microtubule motor activity;GO:0003824//catalytic activity;GO:0005198//structural molecule activity;GO:0005488//binding;GO:0005515//protein binding;GO:0005524//ATP binding;GO:0008017//microtubule binding;GO:0008092//c…	GO:0000003//reproduction;GO:0000070//mitotic sister chromatid segregation;GO:0000086//G2/M transition of mitotic cell cycle;GO:0000226//microtubule cytoskeleton organization;GO:0000278//mitotic cell cycle;GO:0000280//nuclear division;GO:0000741//karyogamy;GO:0000742//karyogamy involved in conjugation with cellular fusion;GO:0000746//conjugation;GO:0000747//conjugation with cellular fusion;GO:0000…
LG01	14151301	14151500	*	2.53e-40	3.15e-36	53.8162	g749	Genebody	Dhc64C	PBC33436.1 Dynein heavy chain, cytoplasmic [Apis cerana cerana]	Human Diseases;Cellular Processes;Organismal Systems	Infectious diseases;Transport and catabolism;Excretory system	ko05132//Salmonella infection;ko04145//Phagosome;ko04962//Vasopressin-regulated water reabsorption	K10413;K10413;K10413	GO:0000235//astral microtubule;GO:0000323//lytic vacuole;GO:0000775//chromosome, centromeric region;GO:0000776//kinetochore;GO:0000922//spindle pole;GO:0002177//manchette;GO:0005575//cellular_component;GO:0005576//extracellular region;GO:0005622//intracellular;GO:0005623//cell;GO:0005634//nucleus;GO:0005635//nuclear envelope;GO:0005694//chromosome;GO:0005737//cytoplasm;GO:0005764//lysosome;GO:000…	GO:0000166//nucleotide binding;GO:0003674//molecular_function;GO:0003677//DNA binding;GO:0003723//RNA binding;GO:0003724//RNA helicase activity;GO:0003774//motor activity;GO:0003777//microtubule motor activity;GO:0003824//catalytic activity;GO:0005198//structural molecule activity;GO:0005488//binding;GO:0005515//protein binding;GO:0005524//ATP binding;GO:0008017//microtubule binding;GO:0008092//c…	GO:0000003//reproduction;GO:0000070//mitotic sister chromatid segregation;GO:0000086//G2/M transition of mitotic cell cycle;GO:0000226//microtubule cytoskeleton organization;GO:0000278//mitotic cell cycle;GO:0000280//nuclear division;GO:0000741//karyogamy;GO:0000742//karyogamy involved in conjugation with cellular fusion;GO:0000746//conjugation;GO:0000747//conjugation with cellular fusion;GO:0000…
LG01	14154101	14154300	*	5.9e-14	3.41e-11	29.11	g749	Genebody	Dhc64C	PBC33436.1 Dynein heavy chain, cytoplasmic [Apis cerana cerana]	Human Diseases;Cellular Processes;Organismal Systems	Infectious diseases;Transport and catabolism;Excretory system	ko05132//Salmonella infection;ko04145//Phagosome;ko04962//Vasopressin-regulated water reabsorption	K10413;K10413;K10413	GO:0000235//astral microtubule;GO:0000323//lytic vacuole;GO:0000775//chromosome, centromeric region;GO:0000776//kinetochore;GO:0000922//spindle pole;GO:0002177//manchette;GO:0005575//cellular_component;GO:0005576//extracellular region;GO:0005622//intracellular;GO:0005623//cell;GO:0005634//nucleus;GO:0005635//nuclear envelope;GO:0005694//chromosome;GO:0005737//cytoplasm;GO:0005764//lysosome;GO:000…	GO:0000166//nucleotide binding;GO:0003674//molecular_function;GO:0003677//DNA binding;GO:0003723//RNA binding;GO:0003724//RNA helicase activity;GO:0003774//motor activity;GO:0003777//microtubule motor activity;GO:0003824//catalytic activity;GO:0005198//structural molecule activity;GO:0005488//binding;GO:0005515//protein binding;GO:0005524//ATP binding;GO:0008017//microtubule binding;GO:0008092//c…	GO:0000003//reproduction;GO:0000070//mitotic sister chromatid segregation;GO:0000086//G2/M transition of mitotic cell cycle;GO:0000226//microtubule cytoskeleton organization;GO:0000278//mitotic cell cycle;GO:0000280//nuclear division;GO:0000741//karyogamy;GO:0000742//karyogamy involved in conjugation with cellular fusion;GO:0000746//conjugation;GO:0000747//conjugation with cellular fusion;GO:0000…
LG01	14154201	14154400	*	3.28e-23	6.37e-20	-33.8875	g749	Genebody	Dhc64C	PBC33436.1 Dynein heavy chain, cytoplasmic [Apis cerana cerana]	Human Diseases;Cellular Processes;Organismal Systems	Infectious diseases;Transport and catabolism;Excretory system	ko05132//Salmonella infection;ko04145//Phagosome;ko04962//Vasopressin-regulated water reabsorption	K10413;K10413;K10413	GO:0000235//astral microtubule;GO:0000323//lytic vacuole;GO:0000775//chromosome, centromeric region;GO:0000776//kinetochore;GO:0000922//spindle pole;GO:0002177//manchette;GO:0005575//cellular_component;GO:0005576//extracellular region;GO:0005622//intracellular;GO:0005623//cell;GO:0005634//nucleus;GO:0005635//nuclear envelope;GO:0005694//chromosome;GO:0005737//cytoplasm;GO:0005764//lysosome;GO:000…	GO:0000166//nucleotide binding;GO:0003674//molecular_function;GO:0003677//DNA binding;GO:0003723//RNA binding;GO:0003724//RNA helicase activity;GO:0003774//motor activity;GO:0003777//microtubule motor activity;GO:0003824//catalytic activity;GO:0005198//structural molecule activity;GO:0005488//binding;GO:0005515//protein binding;GO:0005524//ATP binding;GO:0008017//microtubule binding;GO:0008092//c…	GO:0000003//reproduction;GO:0000070//mitotic sister chromatid segregation;GO:0000086//G2/M transition of mitotic cell cycle;GO:0000226//microtubule cytoskeleton organization;GO:0000278//mitotic cell cycle;GO:0000280//nuclear division;GO:0000741//karyogamy;GO:0000742//karyogamy involved in conjugation with cellular fusion;GO:0000746//conjugation;GO:0000747//conjugation with cellular fusion;GO:0000…
LG01	14154301	14154500	*	3.39e-31	1.67e-27	-42.1609	g749	Genebody	Dhc64C	PBC33436.1 Dynein heavy chain, cytoplasmic [Apis cerana cerana]	Human Diseases;Cellular Processes;Organismal Systems	Infectious diseases;Transport and catabolism;Excretory system	ko05132//Salmonella infection;ko04145//Phagosome;ko04962//Vasopressin-regulated water reabsorption	K10413;K10413;K10413	GO:0000235//astral microtubule;GO:0000323//lytic vacuole;GO:0000775//chromosome, centromeric region;GO:0000776//kinetochore;GO:0000922//spindle pole;GO:0002177//manchette;GO:0005575//cellular_component;GO:0005576//extracellular region;GO:0005622//intracellular;GO:0005623//cell;GO:0005634//nucleus;GO:0005635//nuclear envelope;GO:0005694//chromosome;GO:0005737//cytoplasm;GO:0005764//lysosome;GO:000…	GO:0000166//nucleotide binding;GO:0003674//molecular_function;GO:0003677//DNA binding;GO:0003723//RNA binding;GO:0003724//RNA helicase activity;GO:0003774//motor activity;GO:0003777//microtubule motor activity;GO:0003824//catalytic activity;GO:0005198//structural molecule activity;GO:0005488//binding;GO:0005515//protein binding;GO:0005524//ATP binding;GO:0008017//microtubule binding;GO:0008092//c…	GO:0000003//reproduction;GO:0000070//mitotic sister chromatid segregation;GO:0000086//G2/M transition of mitotic cell cycle;GO:0000226//microtubule cytoskeleton organization;GO:0000278//mitotic cell cycle;GO:0000280//nuclear division;GO:0000741//karyogamy;GO:0000742//karyogamy involved in conjugation with cellular fusion;GO:0000746//conjugation;GO:0000747//conjugation with cellular fusion;GO:0000…
LG01	14155901	14156100	*	4.79e-57	2.9e-52	-25.856	g749	Genebody	Dhc64C	PBC33436.1 Dynein heavy chain, cytoplasmic [Apis cerana cerana]	Human Diseases;Cellular Processes;Organismal Systems	Infectious diseases;Transport and catabolism;Excretory system	ko05132//Salmonella infection;ko04145//Phagosome;ko04962//Vasopressin-regulated water reabsorption	K10413;K10413;K10413	GO:0000235//astral microtubule;GO:0000323//lytic vacuole;GO:0000775//chromosome, centromeric region;GO:0000776//kinetochore;GO:0000922//spindle pole;GO:0002177//manchette;GO:0005575//cellular_component;GO:0005576//extracellular region;GO:0005622//intracellular;GO:0005623//cell;GO:0005634//nucleus;GO:0005635//nuclear envelope;GO:0005694//chromosome;GO:0005737//cytoplasm;GO:0005764//lysosome;GO:000…	GO:0000166//nucleotide binding;GO:0003674//molecular_function;GO:0003677//DNA binding;GO:0003723//RNA binding;GO:0003724//RNA helicase activity;GO:0003774//motor activity;GO:0003777//microtubule motor activity;GO:0003824//catalytic activity;GO:0005198//structural molecule activity;GO:0005488//binding;GO:0005515//protein binding;GO:0005524//ATP binding;GO:0008017//microtubule binding;GO:0008092//c…	GO:0000003//reproduction;GO:0000070//mitotic sister chromatid segregation;GO:0000086//G2/M transition of mitotic cell cycle;GO:0000226//microtubule cytoskeleton organization;GO:0000278//mitotic cell cycle;GO:0000280//nuclear division;GO:0000741//karyogamy;GO:0000742//karyogamy involved in conjugation with cellular fusion;GO:0000746//conjugation;GO:0000747//conjugation with cellular fusion;GO:0000…
LG01	14156001	14156200	*	3.17e-75	9.31e-70	-35.4737	g749	Genebody	Dhc64C	PBC33436.1 Dynein heavy chain, cytoplasmic [Apis cerana cerana]	Human Diseases;Cellular Processes;Organismal Systems	Infectious diseases;Transport and catabolism;Excretory system	ko05132//Salmonella infection;ko04145//Phagosome;ko04962//Vasopressin-regulated water reabsorption	K10413;K10413;K10413	GO:0000235//astral microtubule;GO:0000323//lytic vacuole;GO:0000775//chromosome, centromeric region;GO:0000776//kinetochore;GO:0000922//spindle pole;GO:0002177//manchette;GO:0005575//cellular_component;GO:0005576//extracellular region;GO:0005622//intracellular;GO:0005623//cell;GO:0005634//nucleus;GO:0005635//nuclear envelope;GO:0005694//chromosome;GO:0005737//cytoplasm;GO:0005764//lysosome;GO:000…	GO:0000166//nucleotide binding;GO:0003674//molecular_function;GO:0003677//DNA binding;GO:0003723//RNA binding;GO:0003724//RNA helicase activity;GO:0003774//motor activity;GO:0003777//microtubule motor activity;GO:0003824//catalytic activity;GO:0005198//structural molecule activity;GO:0005488//binding;GO:0005515//protein binding;GO:0005524//ATP binding;GO:0008017//microtubule binding;GO:0008092//c…	GO:0000003//reproduction;GO:0000070//mitotic sister chromatid segregation;GO:0000086//G2/M transition of mitotic cell cycle;GO:0000226//microtubule cytoskeleton organization;GO:0000278//mitotic cell cycle;GO:0000280//nuclear division;GO:0000741//karyogamy;GO:0000742//karyogamy involved in conjugation with cellular fusion;GO:0000746//conjugation;GO:0000747//conjugation with cellular fusion;GO:0000…
LG01	14157701	14157900	*	1.51e-27	5e-24	31.3408	g749	Genebody	Dhc64C	PBC33436.1 Dynein heavy chain, cytoplasmic [Apis cerana cerana]	Human Diseases;Cellular Processes;Organismal Systems	Infectious diseases;Transport and catabolism;Excretory system	ko05132//Salmonella infection;ko04145//Phagosome;ko04962//Vasopressin-regulated water reabsorption	K10413;K10413;K10413	GO:0000235//astral microtubule;GO:0000323//lytic vacuole;GO:0000775//chromosome, centromeric region;GO:0000776//kinetochore;GO:0000922//spindle pole;GO:0002177//manchette;GO:0005575//cellular_component;GO:0005576//extracellular region;GO:0005622//intracellular;GO:0005623//cell;GO:0005634//nucleus;GO:0005635//nuclear envelope;GO:0005694//chromosome;GO:0005737//cytoplasm;GO:0005764//lysosome;GO:000…	GO:0000166//nucleotide binding;GO:0003674//molecular_function;GO:0003677//DNA binding;GO:0003723//RNA binding;GO:0003724//RNA helicase activity;GO:0003774//motor activity;GO:0003777//microtubule motor activity;GO:0003824//catalytic activity;GO:0005198//structural molecule activity;GO:0005488//binding;GO:0005515//protein binding;GO:0005524//ATP binding;GO:0008017//microtubule binding;GO:0008092//c…	GO:0000003//reproduction;GO:0000070//mitotic sister chromatid segregation;GO:0000086//G2/M transition of mitotic cell cycle;GO:0000226//microtubule cytoskeleton organization;GO:0000278//mitotic cell cycle;GO:0000280//nuclear division;GO:0000741//karyogamy;GO:0000742//karyogamy involved in conjugation with cellular fusion;GO:0000746//conjugation;GO:0000747//conjugation with cellular fusion;GO:0000…
LG01	14157801	14158000	*	1.82e-40	2.3e-36	27.4574	g749	Genebody	Dhc64C	PBC33436.1 Dynein heavy chain, cytoplasmic [Apis cerana cerana]	Human Diseases;Cellular Processes;Organismal Systems	Infectious diseases;Transport and catabolism;Excretory system	ko05132//Salmonella infection;ko04145//Phagosome;ko04962//Vasopressin-regulated water reabsorption	K10413;K10413;K10413	GO:0000235//astral microtubule;GO:0000323//lytic vacuole;GO:0000775//chromosome, centromeric region;GO:0000776//kinetochore;GO:0000922//spindle pole;GO:0002177//manchette;GO:0005575//cellular_component;GO:0005576//extracellular region;GO:0005622//intracellular;GO:0005623//cell;GO:0005634//nucleus;GO:0005635//nuclear envelope;GO:0005694//chromosome;GO:0005737//cytoplasm;GO:0005764//lysosome;GO:000…	GO:0000166//nucleotide binding;GO:0003674//molecular_function;GO:0003677//DNA binding;GO:0003723//RNA binding;GO:0003724//RNA helicase activity;GO:0003774//motor activity;GO:0003777//microtubule motor activity;GO:0003824//catalytic activity;GO:0005198//structural molecule activity;GO:0005488//binding;GO:0005515//protein binding;GO:0005524//ATP binding;GO:0008017//microtubule binding;GO:0008092//c…	GO:0000003//reproduction;GO:0000070//mitotic sister chromatid segregation;GO:0000086//G2/M transition of mitotic cell cycle;GO:0000226//microtubule cytoskeleton organization;GO:0000278//mitotic cell cycle;GO:0000280//nuclear division;GO:0000741//karyogamy;GO:0000742//karyogamy involved in conjugation with cellular fusion;GO:0000746//conjugation;GO:0000747//conjugation with cellular fusion;GO:0000…
LG01	14157901	14158100	*	7.12e-36	5.75e-32	31.9179	g749	Genebody	Dhc64C	PBC33436.1 Dynein heavy chain, cytoplasmic [Apis cerana cerana]	Human Diseases;Cellular Processes;Organismal Systems	Infectious diseases;Transport and catabolism;Excretory system	ko05132//Salmonella infection;ko04145//Phagosome;ko04962//Vasopressin-regulated water reabsorption	K10413;K10413;K10413	GO:0000235//astral microtubule;GO:0000323//lytic vacuole;GO:0000775//chromosome, centromeric region;GO:0000776//kinetochore;GO:0000922//spindle pole;GO:0002177//manchette;GO:0005575//cellular_component;GO:0005576//extracellular region;GO:0005622//intracellular;GO:0005623//cell;GO:0005634//nucleus;GO:0005635//nuclear envelope;GO:0005694//chromosome;GO:0005737//cytoplasm;GO:0005764//lysosome;GO:000…	GO:0000166//nucleotide binding;GO:0003674//molecular_function;GO:0003677//DNA binding;GO:0003723//RNA binding;GO:0003724//RNA helicase activity;GO:0003774//motor activity;GO:0003777//microtubule motor activity;GO:0003824//catalytic activity;GO:0005198//structural molecule activity;GO:0005488//binding;GO:0005515//protein binding;GO:0005524//ATP binding;GO:0008017//microtubule binding;GO:0008092//c…	GO:0000003//reproduction;GO:0000070//mitotic sister chromatid segregation;GO:0000086//G2/M transition of mitotic cell cycle;GO:0000226//microtubule cytoskeleton organization;GO:0000278//mitotic cell cycle;GO:0000280//nuclear division;GO:0000741//karyogamy;GO:0000742//karyogamy involved in conjugation with cellular fusion;GO:0000746//conjugation;GO:0000747//conjugation with cellular fusion;GO:0000…
LG01	14158001	14158200	*	6.79e-36	5.51e-32	39.9876	g749	Genebody	Dhc64C	PBC33436.1 Dynein heavy chain, cytoplasmic [Apis cerana cerana]	Human Diseases;Cellular Processes;Organismal Systems	Infectious diseases;Transport and catabolism;Excretory system	ko05132//Salmonella infection;ko04145//Phagosome;ko04962//Vasopressin-regulated water reabsorption	K10413;K10413;K10413	GO:0000235//astral microtubule;GO:0000323//lytic vacuole;GO:0000775//chromosome, centromeric region;GO:0000776//kinetochore;GO:0000922//spindle pole;GO:0002177//manchette;GO:0005575//cellular_component;GO:0005576//extracellular region;GO:0005622//intracellular;GO:0005623//cell;GO:0005634//nucleus;GO:0005635//nuclear envelope;GO:0005694//chromosome;GO:0005737//cytoplasm;GO:0005764//lysosome;GO:000…	GO:0000166//nucleotide binding;GO:0003674//molecular_function;GO:0003677//DNA binding;GO:0003723//RNA binding;GO:0003724//RNA helicase activity;GO:0003774//motor activity;GO:0003777//microtubule motor activity;GO:0003824//catalytic activity;GO:0005198//structural molecule activity;GO:0005488//binding;GO:0005515//protein binding;GO:0005524//ATP binding;GO:0008017//microtubule binding;GO:0008092//c…	GO:0000003//reproduction;GO:0000070//mitotic sister chromatid segregation;GO:0000086//G2/M transition of mitotic cell cycle;GO:0000226//microtubule cytoskeleton organization;GO:0000278//mitotic cell cycle;GO:0000280//nuclear division;GO:0000741//karyogamy;GO:0000742//karyogamy involved in conjugation with cellular fusion;GO:0000746//conjugation;GO:0000747//conjugation with cellular fusion;GO:0000…
LG01	14158101	14158300	*	5.72e-30	2.48e-26	30.714	g749	Genebody	Dhc64C	PBC33436.1 Dynein heavy chain, cytoplasmic [Apis cerana cerana]	Human Diseases;Cellular Processes;Organismal Systems	Infectious diseases;Transport and catabolism;Excretory system	ko05132//Salmonella infection;ko04145//Phagosome;ko04962//Vasopressin-regulated water reabsorption	K10413;K10413;K10413	GO:0000235//astral microtubule;GO:0000323//lytic vacuole;GO:0000775//chromosome, centromeric region;GO:0000776//kinetochore;GO:0000922//spindle pole;GO:0002177//manchette;GO:0005575//cellular_component;GO:0005576//extracellular region;GO:0005622//intracellular;GO:0005623//cell;GO:0005634//nucleus;GO:0005635//nuclear envelope;GO:0005694//chromosome;GO:0005737//cytoplasm;GO:0005764//lysosome;GO:000…	GO:0000166//nucleotide binding;GO:0003674//molecular_function;GO:0003677//DNA binding;GO:0003723//RNA binding;GO:0003724//RNA helicase activity;GO:0003774//motor activity;GO:0003777//microtubule motor activity;GO:0003824//catalytic activity;GO:0005198//structural molecule activity;GO:0005488//binding;GO:0005515//protein binding;GO:0005524//ATP binding;GO:0008017//microtubule binding;GO:0008092//c…	GO:0000003//reproduction;GO:0000070//mitotic sister chromatid segregation;GO:0000086//G2/M transition of mitotic cell cycle;GO:0000226//microtubule cytoskeleton organization;GO:0000278//mitotic cell cycle;GO:0000280//nuclear division;GO:0000741//karyogamy;GO:0000742//karyogamy involved in conjugation with cellular fusion;GO:0000746//conjugation;GO:0000747//conjugation with cellular fusion;GO:0000…
LG01	14159001	14159200	*	3.05e-29	1.2e-25	27.3575	g749	Genebody	Dhc64C	PBC33436.1 Dynein heavy chain, cytoplasmic [Apis cerana cerana]	Human Diseases;Cellular Processes;Organismal Systems	Infectious diseases;Transport and catabolism;Excretory system	ko05132//Salmonella infection;ko04145//Phagosome;ko04962//Vasopressin-regulated water reabsorption	K10413;K10413;K10413	GO:0000235//astral microtubule;GO:0000323//lytic vacuole;GO:0000775//chromosome, centromeric region;GO:0000776//kinetochore;GO:0000922//spindle pole;GO:0002177//manchette;GO:0005575//cellular_component;GO:0005576//extracellular region;GO:0005622//intracellular;GO:0005623//cell;GO:0005634//nucleus;GO:0005635//nuclear envelope;GO:0005694//chromosome;GO:0005737//cytoplasm;GO:0005764//lysosome;GO:000…	GO:0000166//nucleotide binding;GO:0003674//molecular_function;GO:0003677//DNA binding;GO:0003723//RNA binding;GO:0003724//RNA helicase activity;GO:0003774//motor activity;GO:0003777//microtubule motor activity;GO:0003824//catalytic activity;GO:0005198//structural molecule activity;GO:0005488//binding;GO:0005515//protein binding;GO:0005524//ATP binding;GO:0008017//microtubule binding;GO:0008092//c…	GO:0000003//reproduction;GO:0000070//mitotic sister chromatid segregation;GO:0000086//G2/M transition of mitotic cell cycle;GO:0000226//microtubule cytoskeleton organization;GO:0000278//mitotic cell cycle;GO:0000280//nuclear division;GO:0000741//karyogamy;GO:0000742//karyogamy involved in conjugation with cellular fusion;GO:0000746//conjugation;GO:0000747//conjugation with cellular fusion;GO:0000…
LG01	14159501	14159700	*	2.77e-31	1.37e-27	51.0464	g749	Genebody	Dhc64C	PBC33436.1 Dynein heavy chain, cytoplasmic [Apis cerana cerana]	Human Diseases;Cellular Processes;Organismal Systems	Infectious diseases;Transport and catabolism;Excretory system	ko05132//Salmonella infection;ko04145//Phagosome;ko04962//Vasopressin-regulated water reabsorption	K10413;K10413;K10413	GO:0000235//astral microtubule;GO:0000323//lytic vacuole;GO:0000775//chromosome, centromeric region;GO:0000776//kinetochore;GO:0000922//spindle pole;GO:0002177//manchette;GO:0005575//cellular_component;GO:0005576//extracellular region;GO:0005622//intracellular;GO:0005623//cell;GO:0005634//nucleus;GO:0005635//nuclear envelope;GO:0005694//chromosome;GO:0005737//cytoplasm;GO:0005764//lysosome;GO:000…	GO:0000166//nucleotide binding;GO:0003674//molecular_function;GO:0003677//DNA binding;GO:0003723//RNA binding;GO:0003724//RNA helicase activity;GO:0003774//motor activity;GO:0003777//microtubule motor activity;GO:0003824//catalytic activity;GO:0005198//structural molecule activity;GO:0005488//binding;GO:0005515//protein binding;GO:0005524//ATP binding;GO:0008017//microtubule binding;GO:0008092//c…	GO:0000003//reproduction;GO:0000070//mitotic sister chromatid segregation;GO:0000086//G2/M transition of mitotic cell cycle;GO:0000226//microtubule cytoskeleton organization;GO:0000278//mitotic cell cycle;GO:0000280//nuclear division;GO:0000741//karyogamy;GO:0000742//karyogamy involved in conjugation with cellular fusion;GO:0000746//conjugation;GO:0000747//conjugation with cellular fusion;GO:0000…
LG01	14161301	14161500	*	2.13e-31	1.07e-27	-28.977	g749	Genebody	Dhc64C	PBC33436.1 Dynein heavy chain, cytoplasmic [Apis cerana cerana]	Human Diseases;Cellular Processes;Organismal Systems	Infectious diseases;Transport and catabolism;Excretory system	ko05132//Salmonella infection;ko04145//Phagosome;ko04962//Vasopressin-regulated water reabsorption	K10413;K10413;K10413	GO:0000235//astral microtubule;GO:0000323//lytic vacuole;GO:0000775//chromosome, centromeric region;GO:0000776//kinetochore;GO:0000922//spindle pole;GO:0002177//manchette;GO:0005575//cellular_component;GO:0005576//extracellular region;GO:0005622//intracellular;GO:0005623//cell;GO:0005634//nucleus;GO:0005635//nuclear envelope;GO:0005694//chromosome;GO:0005737//cytoplasm;GO:0005764//lysosome;GO:000…	GO:0000166//nucleotide binding;GO:0003674//molecular_function;GO:0003677//DNA binding;GO:0003723//RNA binding;GO:0003724//RNA helicase activity;GO:0003774//motor activity;GO:0003777//microtubule motor activity;GO:0003824//catalytic activity;GO:0005198//structural molecule activity;GO:0005488//binding;GO:0005515//protein binding;GO:0005524//ATP binding;GO:0008017//microtubule binding;GO:0008092//c…	GO:0000003//reproduction;GO:0000070//mitotic sister chromatid segregation;GO:0000086//G2/M transition of mitotic cell cycle;GO:0000226//microtubule cytoskeleton organization;GO:0000278//mitotic cell cycle;GO:0000280//nuclear division;GO:0000741//karyogamy;GO:0000742//karyogamy involved in conjugation with cellular fusion;GO:0000746//conjugation;GO:0000747//conjugation with cellular fusion;GO:0000…
LG01	14161401	14161600	*	2.07e-32	1.19e-28	-34.7057	g749	Genebody	Dhc64C	PBC33436.1 Dynein heavy chain, cytoplasmic [Apis cerana cerana]	Human Diseases;Cellular Processes;Organismal Systems	Infectious diseases;Transport and catabolism;Excretory system	ko05132//Salmonella infection;ko04145//Phagosome;ko04962//Vasopressin-regulated water reabsorption	K10413;K10413;K10413	GO:0000235//astral microtubule;GO:0000323//lytic vacuole;GO:0000775//chromosome, centromeric region;GO:0000776//kinetochore;GO:0000922//spindle pole;GO:0002177//manchette;GO:0005575//cellular_component;GO:0005576//extracellular region;GO:0005622//intracellular;GO:0005623//cell;GO:0005634//nucleus;GO:0005635//nuclear envelope;GO:0005694//chromosome;GO:0005737//cytoplasm;GO:0005764//lysosome;GO:000…	GO:0000166//nucleotide binding;GO:0003674//molecular_function;GO:0003677//DNA binding;GO:0003723//RNA binding;GO:0003724//RNA helicase activity;GO:0003774//motor activity;GO:0003777//microtubule motor activity;GO:0003824//catalytic activity;GO:0005198//structural molecule activity;GO:0005488//binding;GO:0005515//protein binding;GO:0005524//ATP binding;GO:0008017//microtubule binding;GO:0008092//c…	GO:0000003//reproduction;GO:0000070//mitotic sister chromatid segregation;GO:0000086//G2/M transition of mitotic cell cycle;GO:0000226//microtubule cytoskeleton organization;GO:0000278//mitotic cell cycle;GO:0000280//nuclear division;GO:0000741//karyogamy;GO:0000742//karyogamy involved in conjugation with cellular fusion;GO:0000746//conjugation;GO:0000747//conjugation with cellular fusion;GO:0000…
LG01	14204401	14204600	*	2.63e-19	3.16e-16	35.3655	g752	Genebody	IAP	PBC33432.1 Apoptosis inhibitor IAP [Apis cerana cerana]	Human Diseases;Genetic Information Processing;Human Diseases;Human Diseases;Cellular Processes	Cancers;Folding, sorting and degradation;Infectious diseases;Cancers;Cell growth and death	ko05200//Pathways in cancer;ko04120//Ubiquitin mediated proteolysis;ko05145//Toxoplasmosis;ko05222//Small cell lung cancer;ko04215//Apoptosis - multiple species	K16061;K16061;K16061;K16061;K16061	-	-	-
LG01	14209601	14209800	*	2.12e-08	4.57e-06	-27.7189	g753	Genebody	Son	XP_016921563.1 protein SON isoform X1 [Apis cerana]	-	-	-	-	GO:0005575//cellular_component;GO:0005622//intracellular;GO:0005623//cell;GO:0005634//nucleus;GO:0005654//nucleoplasm;GO:0016604//nuclear body;GO:0016607//nuclear speck;GO:0031974//membrane-enclosed lumen;GO:0031981//nuclear lumen;GO:0043226//organelle;GO:0043227//membrane-bounded organelle;GO:0043229//intracellular organelle;GO:0043231//intracellular membrane-bounded organelle;GO:0043233//organe…	GO:0003674//molecular_function;GO:0003676//nucleic acid binding;GO:0003677//DNA binding;GO:0003723//RNA binding;GO:0003725//double-stranded RNA binding;GO:0004525//ribonuclease III activity;GO:0005488//binding;GO:0005515//protein binding;GO:0019904//protein domain specific binding;GO:0050733//RS domain binding;GO:0097159//organic cyclic compound binding;GO:1901363//heterocyclic compound binding	GO:0000226//microtubule cytoskeleton organization;GO:0000278//mitotic cell cycle;GO:0000281//mitotic cytokinesis;GO:0000910//cytokinesis;GO:0006139//nucleobase-containing compound metabolic process;GO:0006351//transcription, DNA-templated;GO:0006355//regulation of transcription, DNA-templated;GO:0006396//RNA processing;GO:0006397//mRNA processing;GO:0006725//cellular aromatic compound metabolic p…
LG01	14234301	14234500	*	2.61e-14	1.58e-11	-32.3078	g757	Genebody	Intu	XP_016921517.1 protein inturned isoform X1 [Apis cerana]	-	-	-	-	-	GO:0005515//protein binding	GO:0016192//vesicle-mediated transport
LG01	14278301	14278500	*	1.98e-42	2.98e-38	33.6121	g765	Genebody	Synj1	XP_016921555.1 synaptojanin-1 [Apis cerana]	Metabolism;Environmental Information Processing;Metabolism	Global and overview maps;Signal transduction;Carbohydrate metabolism	ko01100//Metabolic pathways;ko04070//Phosphatidylinositol signaling system;ko00562//Inositol phosphate metabolism	K20279;K20279;K20279	GO:0000323//lytic vacuole;GO:0005575//cellular_component;GO:0005622//intracellular;GO:0005623//cell;GO:0005737//cytoplasm;GO:0005764//lysosome;GO:0005767//secondary lysosome;GO:0005773//vacuole;GO:0005776//autophagosome;GO:0005829//cytosol;GO:0005886//plasma membrane;GO:0005905//coated pit;GO:0008021//synaptic vesicle;GO:0012505//endomembrane system;GO:0012506//vesicle membrane;GO:0016020//membra…	GO:0000287//magnesium ion binding;GO:0003674//molecular_function;GO:0003676//nucleic acid binding;GO:0003723//RNA binding;GO:0003824//catalytic activity;GO:0004438//phosphatidylinositol-3-phosphatase activity;GO:0004439//phosphatidylinositol-4,5-bisphosphate 5-phosphatase activity;GO:0005488//binding;GO:0005515//protein binding;GO:0008022//protein C-terminus binding;GO:0009045//xylose isomerase a…	GO:0001101//response to acid chemical;GO:0001505//regulation of neurotransmitter levels;GO:0001956//positive regulation of neurotransmitter secretion;GO:0003008//system process;GO:0003012//muscle system process;GO:0005975//carbohydrate metabolic process;GO:0006066//alcohol metabolic process;GO:0006098//pentose-phosphate shunt;GO:0006629//lipid metabolic process;GO:0006644//phospholipid metabolic …
LG01	14278401	14278600	*	3.85e-44	7.36e-40	34.7071	g765	Genebody	Synj1	XP_016921555.1 synaptojanin-1 [Apis cerana]	Metabolism;Environmental Information Processing;Metabolism	Global and overview maps;Signal transduction;Carbohydrate metabolism	ko01100//Metabolic pathways;ko04070//Phosphatidylinositol signaling system;ko00562//Inositol phosphate metabolism	K20279;K20279;K20279	GO:0000323//lytic vacuole;GO:0005575//cellular_component;GO:0005622//intracellular;GO:0005623//cell;GO:0005737//cytoplasm;GO:0005764//lysosome;GO:0005767//secondary lysosome;GO:0005773//vacuole;GO:0005776//autophagosome;GO:0005829//cytosol;GO:0005886//plasma membrane;GO:0005905//coated pit;GO:0008021//synaptic vesicle;GO:0012505//endomembrane system;GO:0012506//vesicle membrane;GO:0016020//membra…	GO:0000287//magnesium ion binding;GO:0003674//molecular_function;GO:0003676//nucleic acid binding;GO:0003723//RNA binding;GO:0003824//catalytic activity;GO:0004438//phosphatidylinositol-3-phosphatase activity;GO:0004439//phosphatidylinositol-4,5-bisphosphate 5-phosphatase activity;GO:0005488//binding;GO:0005515//protein binding;GO:0008022//protein C-terminus binding;GO:0009045//xylose isomerase a…	GO:0001101//response to acid chemical;GO:0001505//regulation of neurotransmitter levels;GO:0001956//positive regulation of neurotransmitter secretion;GO:0003008//system process;GO:0003012//muscle system process;GO:0005975//carbohydrate metabolic process;GO:0006066//alcohol metabolic process;GO:0006098//pentose-phosphate shunt;GO:0006629//lipid metabolic process;GO:0006644//phospholipid metabolic …
LG01	14343901	14344100	*	1.54e-24	3.45e-21	-47.2427	g771	Genebody	fcho2	PBC33413.1 FCH domain only protein [Apis cerana cerana]	-	-	-	-	GO:0005575//cellular_component;GO:0005622//intracellular;GO:0005623//cell;GO:0005737//cytoplasm;GO:0005886//plasma membrane;GO:0005905//coated pit;GO:0012505//endomembrane system;GO:0016020//membrane;GO:0016021//integral component of membrane;GO:0044424//intracellular part;GO:0044425//membrane part;GO:0044464//cell part;GO:0071944//cell periphery	GO:0003674//molecular_function;GO:0005085//guanyl-nucleotide exchange factor activity;GO:0005488//binding;GO:0005515//protein binding;GO:0005543//phospholipid binding;GO:0008289//lipid binding;GO:0035612//AP-2 adaptor complex binding;GO:0043167//ion binding;GO:0043168//anion binding;GO:0044877//macromolecular complex binding	GO:0006810//transport;GO:0006897//endocytosis;GO:0006898//receptor-mediated endocytosis;GO:0007264//small GTPase mediated signal transduction;GO:0008150//biological_process;GO:0016192//vesicle-mediated transport;GO:0051179//localization;GO:0051234//establishment of localization;GO:0072583//clathrin-mediated endocytosis;GO:0098657//import into cell
LG01	14344001	14344200	*	4.02e-11	1.47e-08	-31.877	g771	Genebody	fcho2	PBC33413.1 FCH domain only protein [Apis cerana cerana]	-	-	-	-	GO:0005575//cellular_component;GO:0005622//intracellular;GO:0005623//cell;GO:0005737//cytoplasm;GO:0005886//plasma membrane;GO:0005905//coated pit;GO:0012505//endomembrane system;GO:0016020//membrane;GO:0016021//integral component of membrane;GO:0044424//intracellular part;GO:0044425//membrane part;GO:0044464//cell part;GO:0071944//cell periphery	GO:0003674//molecular_function;GO:0005085//guanyl-nucleotide exchange factor activity;GO:0005488//binding;GO:0005515//protein binding;GO:0005543//phospholipid binding;GO:0008289//lipid binding;GO:0035612//AP-2 adaptor complex binding;GO:0043167//ion binding;GO:0043168//anion binding;GO:0044877//macromolecular complex binding	GO:0006810//transport;GO:0006897//endocytosis;GO:0006898//receptor-mediated endocytosis;GO:0007264//small GTPase mediated signal transduction;GO:0008150//biological_process;GO:0016192//vesicle-mediated transport;GO:0051179//localization;GO:0051234//establishment of localization;GO:0072583//clathrin-mediated endocytosis;GO:0098657//import into cell
LG01	14484501	14484700	*	1.77e-45	3.9e-41	-53.7649	g782	Genebody	--	PBC33401.1 COPII coat assembly protein [Apis cerana cerana]	-	-	-	-	-	-	-
LG01	14484601	14484800	*	1.31e-31	6.76e-28	-52.6256	g782	Genebody	--	PBC33401.1 COPII coat assembly protein [Apis cerana cerana]	-	-	-	-	-	-	-
LG01	14485101	14485300	*	1.32e-15	9.59e-13	-43.1988	g782	Genebody	--	PBC33401.1 COPII coat assembly protein [Apis cerana cerana]	-	-	-	-	-	-	-
LG01	14485201	14485400	*	8.7e-18	8.54e-15	-33.2476	g782	Genebody	--	PBC33401.1 COPII coat assembly protein [Apis cerana cerana]	-	-	-	-	-	-	-
LG01	14498101	14498300	*	1.31e-25	3.31e-22	48.8914	g784	Genebody	PHC3	XP_016921485.1 transcription factor SPT20 homolog isoform X3 [Apis cerana]	-	-	-	-	GO:0000151//ubiquitin ligase complex;GO:0000152//nuclear ubiquitin ligase complex;GO:0000785//chromatin;GO:0000792//heterochromatin;GO:0005575//cellular_component;GO:0005622//intracellular;GO:0005623//cell;GO:0005634//nucleus;GO:0005654//nucleoplasm;GO:0005694//chromosome;GO:0031519//PcG protein complex;GO:0031974//membrane-enclosed lumen;GO:0031981//nuclear lumen;GO:0032991//macromolecular compl…	GO:0003674//molecular_function;GO:0003676//nucleic acid binding;GO:0003677//DNA binding;GO:0005488//binding;GO:0005515//protein binding;GO:0008270//zinc ion binding;GO:0042802//identical protein binding;GO:0043167//ion binding;GO:0043169//cation binding;GO:0046872//metal ion binding;GO:0046914//transition metal ion binding;GO:0097159//organic cyclic compound binding;GO:1901363//heterocyclic compo…	GO:0000003//reproduction;GO:0007275//multicellular organism development;GO:0007276//gamete generation;GO:0007283//spermatogenesis;GO:0008150//biological_process;GO:0019953//sexual reproduction;GO:0022414//reproductive process;GO:0032501//multicellular organismal process;GO:0032502//developmental process;GO:0032504//multicellular organism reproduction;GO:0044703//multi-organism reproductive proces…
LG01	14499001	14499200	*	5.76e-16	4.41e-13	37.5879	g784	Genebody	PHC3	XP_016921485.1 transcription factor SPT20 homolog isoform X3 [Apis cerana]	-	-	-	-	GO:0000151//ubiquitin ligase complex;GO:0000152//nuclear ubiquitin ligase complex;GO:0000785//chromatin;GO:0000792//heterochromatin;GO:0005575//cellular_component;GO:0005622//intracellular;GO:0005623//cell;GO:0005634//nucleus;GO:0005654//nucleoplasm;GO:0005694//chromosome;GO:0031519//PcG protein complex;GO:0031974//membrane-enclosed lumen;GO:0031981//nuclear lumen;GO:0032991//macromolecular compl…	GO:0003674//molecular_function;GO:0003676//nucleic acid binding;GO:0003677//DNA binding;GO:0005488//binding;GO:0005515//protein binding;GO:0008270//zinc ion binding;GO:0042802//identical protein binding;GO:0043167//ion binding;GO:0043169//cation binding;GO:0046872//metal ion binding;GO:0046914//transition metal ion binding;GO:0097159//organic cyclic compound binding;GO:1901363//heterocyclic compo…	GO:0000003//reproduction;GO:0007275//multicellular organism development;GO:0007276//gamete generation;GO:0007283//spermatogenesis;GO:0008150//biological_process;GO:0019953//sexual reproduction;GO:0022414//reproductive process;GO:0032501//multicellular organismal process;GO:0032502//developmental process;GO:0032504//multicellular organism reproduction;GO:0044703//multi-organism reproductive proces…
LG01	14499101	14499300	*	5.76e-16	4.41e-13	37.5879	g784	Genebody	PHC3	XP_016921485.1 transcription factor SPT20 homolog isoform X3 [Apis cerana]	-	-	-	-	GO:0000151//ubiquitin ligase complex;GO:0000152//nuclear ubiquitin ligase complex;GO:0000785//chromatin;GO:0000792//heterochromatin;GO:0005575//cellular_component;GO:0005622//intracellular;GO:0005623//cell;GO:0005634//nucleus;GO:0005654//nucleoplasm;GO:0005694//chromosome;GO:0031519//PcG protein complex;GO:0031974//membrane-enclosed lumen;GO:0031981//nuclear lumen;GO:0032991//macromolecular compl…	GO:0003674//molecular_function;GO:0003676//nucleic acid binding;GO:0003677//DNA binding;GO:0005488//binding;GO:0005515//protein binding;GO:0008270//zinc ion binding;GO:0042802//identical protein binding;GO:0043167//ion binding;GO:0043169//cation binding;GO:0046872//metal ion binding;GO:0046914//transition metal ion binding;GO:0097159//organic cyclic compound binding;GO:1901363//heterocyclic compo…	GO:0000003//reproduction;GO:0007275//multicellular organism development;GO:0007276//gamete generation;GO:0007283//spermatogenesis;GO:0008150//biological_process;GO:0019953//sexual reproduction;GO:0022414//reproductive process;GO:0032501//multicellular organismal process;GO:0032502//developmental process;GO:0032504//multicellular organism reproduction;GO:0044703//multi-organism reproductive proces…
LG01	14531001	14531200	*	2.07e-10	6.61e-08	-26.5095	g789	Genebody	Bub1	PBC33393.1 Mitotic checkpoint serine/threonine-protein kinase BUB1 [Apis cerana cerana]	Cellular Processes;Cellular Processes;Organismal Systems	Cell growth and death;Cell growth and death;Endocrine system	ko04110//Cell cycle;ko04114//Oocyte meiosis;ko04914//Progesterone-mediated oocyte maturation	K02178;K02178;K02178	GO:0000228//nuclear chromosome;GO:0000775//chromosome, centromeric region;GO:0000776//kinetochore;GO:0000777//condensed chromosome kinetochore;GO:0000778//condensed nuclear chromosome kinetochore;GO:0000779//condensed chromosome, centromeric region;GO:0000780//condensed nuclear chromosome, centromeric region;GO:0000793//condensed chromosome;GO:0000794//condensed nuclear chromosome;GO:0000940//con…	GO:0000166//nucleotide binding;GO:0003674//molecular_function;GO:0003824//catalytic activity;GO:0004672//protein kinase activity;GO:0004674//protein serine/threonine kinase activity;GO:0005488//binding;GO:0005515//protein binding;GO:0005524//ATP binding;GO:0008144//drug binding;GO:0016301//kinase activity;GO:0016616//oxidoreductase activity, acting on the CH-OH group of donors, NAD or NADP as acc…	GO:0000003//reproduction;GO:0000075//cell cycle checkpoint;GO:0000212//meiotic spindle organization;GO:0000226//microtubule cytoskeleton organization;GO:0000278//mitotic cell cycle;GO:0000280//nuclear division;GO:0000819//sister chromatid segregation;GO:0003006//developmental process involved in reproduction;GO:0006355//regulation of transcription, DNA-templated;GO:0006464//cellular protein modif…
LG01	14605801	14606000	*	1.19e-43	2.16e-39	48.7852	g806	Genebody	gpr89	PBC33375.1 Golgi pH regulator [Apis cerana cerana]	-	-	-	-	GO:0000139//Golgi membrane;GO:0005575//cellular_component;GO:0005622//intracellular;GO:0005623//cell;GO:0005737//cytoplasm;GO:0005783//endoplasmic reticulum;GO:0005789//endoplasmic reticulum membrane;GO:0005794//Golgi apparatus;GO:0005795//Golgi stack;GO:0005798//Golgi-associated vesicle;GO:0012505//endomembrane system;GO:0016020//membrane;GO:0016021//integral component of membrane;GO:0030660//Go…	GO:0002020//protease binding;GO:0003674//molecular_function;GO:0005215//transporter activity;GO:0005216//ion channel activity;GO:0005244//voltage-gated ion channel activity;GO:0005253//anion channel activity;GO:0005488//binding;GO:0005515//protein binding;GO:0008308//voltage-gated anion channel activity;GO:0008509//anion transmembrane transporter activity;GO:0015075//ion transmembrane transporter…	GO:0002790//peptide secretion;GO:0006810//transport;GO:0006811//ion transport;GO:0006820//anion transport;GO:0006873//cellular ion homeostasis;GO:0006885//regulation of pH;GO:0006928//movement of cell or subcellular component;GO:0006996//organelle organization;GO:0007030//Golgi organization;GO:0007032//endosome organization;GO:0007275//multicellular organism development;GO:0008104//protein locali…
LG01	14605901	14606100	*	3.69e-54	1.86e-49	49.3463	g806	Genebody	gpr89	PBC33375.1 Golgi pH regulator [Apis cerana cerana]	-	-	-	-	GO:0000139//Golgi membrane;GO:0005575//cellular_component;GO:0005622//intracellular;GO:0005623//cell;GO:0005737//cytoplasm;GO:0005783//endoplasmic reticulum;GO:0005789//endoplasmic reticulum membrane;GO:0005794//Golgi apparatus;GO:0005795//Golgi stack;GO:0005798//Golgi-associated vesicle;GO:0012505//endomembrane system;GO:0016020//membrane;GO:0016021//integral component of membrane;GO:0030660//Go…	GO:0002020//protease binding;GO:0003674//molecular_function;GO:0005215//transporter activity;GO:0005216//ion channel activity;GO:0005244//voltage-gated ion channel activity;GO:0005253//anion channel activity;GO:0005488//binding;GO:0005515//protein binding;GO:0008308//voltage-gated anion channel activity;GO:0008509//anion transmembrane transporter activity;GO:0015075//ion transmembrane transporter…	GO:0002790//peptide secretion;GO:0006810//transport;GO:0006811//ion transport;GO:0006820//anion transport;GO:0006873//cellular ion homeostasis;GO:0006885//regulation of pH;GO:0006928//movement of cell or subcellular component;GO:0006996//organelle organization;GO:0007030//Golgi organization;GO:0007032//endosome organization;GO:0007275//multicellular organism development;GO:0008104//protein locali…
LG01	14606301	14606500	*	1.74e-26	4.98e-23	36.5098	g806	Genebody	gpr89	PBC33375.1 Golgi pH regulator [Apis cerana cerana]	-	-	-	-	GO:0000139//Golgi membrane;GO:0005575//cellular_component;GO:0005622//intracellular;GO:0005623//cell;GO:0005737//cytoplasm;GO:0005783//endoplasmic reticulum;GO:0005789//endoplasmic reticulum membrane;GO:0005794//Golgi apparatus;GO:0005795//Golgi stack;GO:0005798//Golgi-associated vesicle;GO:0012505//endomembrane system;GO:0016020//membrane;GO:0016021//integral component of membrane;GO:0030660//Go…	GO:0002020//protease binding;GO:0003674//molecular_function;GO:0005215//transporter activity;GO:0005216//ion channel activity;GO:0005244//voltage-gated ion channel activity;GO:0005253//anion channel activity;GO:0005488//binding;GO:0005515//protein binding;GO:0008308//voltage-gated anion channel activity;GO:0008509//anion transmembrane transporter activity;GO:0015075//ion transmembrane transporter…	GO:0002790//peptide secretion;GO:0006810//transport;GO:0006811//ion transport;GO:0006820//anion transport;GO:0006873//cellular ion homeostasis;GO:0006885//regulation of pH;GO:0006928//movement of cell or subcellular component;GO:0006996//organelle organization;GO:0007030//Golgi organization;GO:0007032//endosome organization;GO:0007275//multicellular organism development;GO:0008104//protein locali…
LG01	14606401	14606600	*	3.67e-25	8.74e-22	39.0976	g806	Genebody	gpr89	PBC33375.1 Golgi pH regulator [Apis cerana cerana]	-	-	-	-	GO:0000139//Golgi membrane;GO:0005575//cellular_component;GO:0005622//intracellular;GO:0005623//cell;GO:0005737//cytoplasm;GO:0005783//endoplasmic reticulum;GO:0005789//endoplasmic reticulum membrane;GO:0005794//Golgi apparatus;GO:0005795//Golgi stack;GO:0005798//Golgi-associated vesicle;GO:0012505//endomembrane system;GO:0016020//membrane;GO:0016021//integral component of membrane;GO:0030660//Go…	GO:0002020//protease binding;GO:0003674//molecular_function;GO:0005215//transporter activity;GO:0005216//ion channel activity;GO:0005244//voltage-gated ion channel activity;GO:0005253//anion channel activity;GO:0005488//binding;GO:0005515//protein binding;GO:0008308//voltage-gated anion channel activity;GO:0008509//anion transmembrane transporter activity;GO:0015075//ion transmembrane transporter…	GO:0002790//peptide secretion;GO:0006810//transport;GO:0006811//ion transport;GO:0006820//anion transport;GO:0006873//cellular ion homeostasis;GO:0006885//regulation of pH;GO:0006928//movement of cell or subcellular component;GO:0006996//organelle organization;GO:0007030//Golgi organization;GO:0007032//endosome organization;GO:0007275//multicellular organism development;GO:0008104//protein locali…
LG01	14608101	14608300	*	2.5e-38	2.6e-34	37.7544	g807	Genebody	GANAB	PBC33374.1 Neutral alpha-glucosidase AB [Apis cerana cerana]	Metabolism;Genetic Information Processing;Metabolism	Global and overview maps;Folding, sorting and degradation;Glycan biosynthesis and metabolism	ko01100//Metabolic pathways;ko04141//Protein processing in endoplasmic reticulum;ko00510//N-Glycan biosynthesis	K05546;K05546;K05546	GO:0005575//cellular_component;GO:0005622//intracellular;GO:0005623//cell;GO:0005737//cytoplasm;GO:0005739//mitochondrion;GO:0005783//endoplasmic reticulum;GO:0005788//endoplasmic reticulum lumen;GO:0005794//Golgi apparatus;GO:0012505//endomembrane system;GO:0017177//glucosidase II complex;GO:0031974//membrane-enclosed lumen;GO:0032991//macromolecular complex;GO:0043226//organelle;GO:0043227//mem…	GO:0003674//molecular_function;GO:0003824//catalytic activity;GO:0004553//hydrolase activity, hydrolyzing O-glycosyl compounds;GO:0005488//binding;GO:0015926//glucosidase activity;GO:0016787//hydrolase activity;GO:0016798//hydrolase activity, acting on glycosyl bonds;GO:0030246//carbohydrate binding;GO:0033919//glucan 1,3-alpha-glucosidase activity;GO:0090599//alpha-glucosidase activity;GO:009060…	GO:0000271//polysaccharide biosynthetic process;GO:0005975//carbohydrate metabolic process;GO:0005976//polysaccharide metabolic process;GO:0006073//cellular glucan metabolic process;GO:0006464//cellular protein modification process;GO:0006486//protein glycosylation;GO:0006487//protein N-linked glycosylation;GO:0006491//N-glycan processing;GO:0006807//nitrogen compound metabolic process;GO:0008150…
LG01	14608201	14608400	*	1.57e-49	4.39e-45	52.4197	g807	Genebody	GANAB	PBC33374.1 Neutral alpha-glucosidase AB [Apis cerana cerana]	Metabolism;Genetic Information Processing;Metabolism	Global and overview maps;Folding, sorting and degradation;Glycan biosynthesis and metabolism	ko01100//Metabolic pathways;ko04141//Protein processing in endoplasmic reticulum;ko00510//N-Glycan biosynthesis	K05546;K05546;K05546	GO:0005575//cellular_component;GO:0005622//intracellular;GO:0005623//cell;GO:0005737//cytoplasm;GO:0005739//mitochondrion;GO:0005783//endoplasmic reticulum;GO:0005788//endoplasmic reticulum lumen;GO:0005794//Golgi apparatus;GO:0012505//endomembrane system;GO:0017177//glucosidase II complex;GO:0031974//membrane-enclosed lumen;GO:0032991//macromolecular complex;GO:0043226//organelle;GO:0043227//mem…	GO:0003674//molecular_function;GO:0003824//catalytic activity;GO:0004553//hydrolase activity, hydrolyzing O-glycosyl compounds;GO:0005488//binding;GO:0015926//glucosidase activity;GO:0016787//hydrolase activity;GO:0016798//hydrolase activity, acting on glycosyl bonds;GO:0030246//carbohydrate binding;GO:0033919//glucan 1,3-alpha-glucosidase activity;GO:0090599//alpha-glucosidase activity;GO:009060…	GO:0000271//polysaccharide biosynthetic process;GO:0005975//carbohydrate metabolic process;GO:0005976//polysaccharide metabolic process;GO:0006073//cellular glucan metabolic process;GO:0006464//cellular protein modification process;GO:0006486//protein glycosylation;GO:0006487//protein N-linked glycosylation;GO:0006491//N-glycan processing;GO:0006807//nitrogen compound metabolic process;GO:0008150…
LG01	14609101	14609300	*	2.14e-15	1.51e-12	30.7595	g807	Genebody	GANAB	PBC33374.1 Neutral alpha-glucosidase AB [Apis cerana cerana]	Metabolism;Genetic Information Processing;Metabolism	Global and overview maps;Folding, sorting and degradation;Glycan biosynthesis and metabolism	ko01100//Metabolic pathways;ko04141//Protein processing in endoplasmic reticulum;ko00510//N-Glycan biosynthesis	K05546;K05546;K05546	GO:0005575//cellular_component;GO:0005622//intracellular;GO:0005623//cell;GO:0005737//cytoplasm;GO:0005739//mitochondrion;GO:0005783//endoplasmic reticulum;GO:0005788//endoplasmic reticulum lumen;GO:0005794//Golgi apparatus;GO:0012505//endomembrane system;GO:0017177//glucosidase II complex;GO:0031974//membrane-enclosed lumen;GO:0032991//macromolecular complex;GO:0043226//organelle;GO:0043227//mem…	GO:0003674//molecular_function;GO:0003824//catalytic activity;GO:0004553//hydrolase activity, hydrolyzing O-glycosyl compounds;GO:0005488//binding;GO:0015926//glucosidase activity;GO:0016787//hydrolase activity;GO:0016798//hydrolase activity, acting on glycosyl bonds;GO:0030246//carbohydrate binding;GO:0033919//glucan 1,3-alpha-glucosidase activity;GO:0090599//alpha-glucosidase activity;GO:009060…	GO:0000271//polysaccharide biosynthetic process;GO:0005975//carbohydrate metabolic process;GO:0005976//polysaccharide metabolic process;GO:0006073//cellular glucan metabolic process;GO:0006464//cellular protein modification process;GO:0006486//protein glycosylation;GO:0006487//protein N-linked glycosylation;GO:0006491//N-glycan processing;GO:0006807//nitrogen compound metabolic process;GO:0008150…
LG01	14609201	14609400	*	2.99e-27	9.45e-24	40.5967	g807	Genebody	GANAB	PBC33374.1 Neutral alpha-glucosidase AB [Apis cerana cerana]	Metabolism;Genetic Information Processing;Metabolism	Global and overview maps;Folding, sorting and degradation;Glycan biosynthesis and metabolism	ko01100//Metabolic pathways;ko04141//Protein processing in endoplasmic reticulum;ko00510//N-Glycan biosynthesis	K05546;K05546;K05546	GO:0005575//cellular_component;GO:0005622//intracellular;GO:0005623//cell;GO:0005737//cytoplasm;GO:0005739//mitochondrion;GO:0005783//endoplasmic reticulum;GO:0005788//endoplasmic reticulum lumen;GO:0005794//Golgi apparatus;GO:0012505//endomembrane system;GO:0017177//glucosidase II complex;GO:0031974//membrane-enclosed lumen;GO:0032991//macromolecular complex;GO:0043226//organelle;GO:0043227//mem…	GO:0003674//molecular_function;GO:0003824//catalytic activity;GO:0004553//hydrolase activity, hydrolyzing O-glycosyl compounds;GO:0005488//binding;GO:0015926//glucosidase activity;GO:0016787//hydrolase activity;GO:0016798//hydrolase activity, acting on glycosyl bonds;GO:0030246//carbohydrate binding;GO:0033919//glucan 1,3-alpha-glucosidase activity;GO:0090599//alpha-glucosidase activity;GO:009060…	GO:0000271//polysaccharide biosynthetic process;GO:0005975//carbohydrate metabolic process;GO:0005976//polysaccharide metabolic process;GO:0006073//cellular glucan metabolic process;GO:0006464//cellular protein modification process;GO:0006486//protein glycosylation;GO:0006487//protein N-linked glycosylation;GO:0006491//N-glycan processing;GO:0006807//nitrogen compound metabolic process;GO:0008150…
LG01	15095301	15095500	*	5.86e-13	2.87e-10	-27.3972	g829	Genebody	PMPCB	XP_016921335.1 mitochondrial-processing peptidase subunit beta [Apis cerana]	-	-	-	-	GO:0005575//cellular_component;GO:0005622//intracellular;GO:0005623//cell;GO:0005737//cytoplasm;GO:0005739//mitochondrion;GO:0005740//mitochondrial envelope;GO:0005743//mitochondrial inner membrane;GO:0005746//mitochondrial respiratory chain;GO:0005750//mitochondrial respiratory chain complex III;GO:0005759//mitochondrial matrix;GO:0016020//membrane;GO:0017087//mitochondrial processing peptidase …	GO:0003674//molecular_function;GO:0003824//catalytic activity;GO:0004175//endopeptidase activity;GO:0004222//metalloendopeptidase activity;GO:0005488//binding;GO:0005515//protein binding;GO:0008121//ubiquinol-cytochrome-c reductase activity;GO:0008233//peptidase activity;GO:0008237//metallopeptidase activity;GO:0008270//zinc ion binding;GO:0009055//electron carrier activity;GO:0016491//oxidoreduc…	GO:0006091//generation of precursor metabolites and energy;GO:0006119//oxidative phosphorylation;GO:0006122//mitochondrial electron transport, ubiquinol to cytochrome c;GO:0006139//nucleobase-containing compound metabolic process;GO:0006163//purine nucleotide metabolic process;GO:0006508//proteolysis;GO:0006605//protein targeting;GO:0006626//protein targeting to mitochondrion;GO:0006627//protein …
LG01	15106801	15107000	*	6.1e-11	2.15e-08	26.0751	g832	Genebody	Kiaa0232	PBC33355.1 hypothetical protein APICC_06839 [Apis cerana cerana]	-	-	-	-	-	GO:0000166//nucleotide binding;GO:0003674//molecular_function;GO:0005488//binding;GO:0005524//ATP binding;GO:0008144//drug binding;GO:0017076//purine nucleotide binding;GO:0030554//adenyl nucleotide binding;GO:0032553//ribonucleotide binding;GO:0032555//purine ribonucleotide binding;GO:0032559//adenyl ribonucleotide binding;GO:0035639//purine ribonucleoside triphosphate binding;GO:0036094//small …	-
LG01	16347001	16347200	*	1.5e-10	4.94e-08	29.5174	g873	Genebody	PAPOLA	XP_003694961.1 poly(A) polymerase type 3 isoform X1 [Apis florea]	Genetic Information Processing	Translation	ko03015//mRNA surveillance pathway	K14376	GO:0005575//cellular_component;GO:0005622//intracellular;GO:0005623//cell;GO:0005634//nucleus;GO:0005654//nucleoplasm;GO:0005737//cytoplasm;GO:0005829//cytosol;GO:0005847//mRNA cleavage and polyadenylation specificity factor complex;GO:0005849//mRNA cleavage factor complex;GO:0016604//nuclear body;GO:0031974//membrane-enclosed lumen;GO:0031981//nuclear lumen;GO:0032991//macromolecular complex;GO:…	GO:0000166//nucleotide binding;GO:0003674//molecular_function;GO:0003676//nucleic acid binding;GO:0003723//RNA binding;GO:0003824//catalytic activity;GO:0004652//polynucleotide adenylyltransferase activity;GO:0005488//binding;GO:0005524//ATP binding;GO:0008144//drug binding;GO:0016740//transferase activity;GO:0016772//transferase activity, transferring phosphorus-containing groups;GO:0016779//nuc…	GO:0000956//nuclear-transcribed mRNA catabolic process;GO:0006139//nucleobase-containing compound metabolic process;GO:0006378//mRNA polyadenylation;GO:0006396//RNA processing;GO:0006397//mRNA processing;GO:0006401//RNA catabolic process;GO:0006402//mRNA catabolic process;GO:0006725//cellular aromatic compound metabolic process;GO:0006807//nitrogen compound metabolic process;GO:0008150//biologica…
LG01	18576201	18576400	*	2.54e-07	4.32e-05	-25.6556	g929	Genebody	RhoGAPp190	XP_028519788.1 rho GTPase-activating protein 190 isoform X3 [Apis cerana]	Cellular Processes;Organismal Systems	Cellular community - eukaryotes;Immune system	ko04510//Focal adhesion;ko04670//Leukocyte transendothelial migration	K13709;K13709	GO:0005575//cellular_component;GO:0005737//cytoplasm	GO:0000166//nucleotide binding;GO:0001882//nucleoside binding;GO:0001883//purine nucleoside binding;GO:0003674//molecular_function;GO:0003725//double-stranded RNA binding;GO:0003824//catalytic activity;GO:0003924//GTPase activity;GO:0005096//GTPase activator activity;GO:0005102//receptor binding;GO:0005488//binding;GO:0005515//protein binding;GO:0005525//GTP binding;GO:0008047//enzyme activator a…	GO:0007154//cell communication;GO:0007165//signal transduction;GO:0007264//small GTPase mediated signal transduction;GO:0007265//Ras protein signal transduction;GO:0007266//Rho protein signal transduction;GO:0007275//multicellular organism development;GO:0007399//nervous system development;GO:0007414//axonal defasciculation;GO:0007415//defasciculation of motor neuron axon;GO:0007417//central nerv…
LG01	18576301	18576500	*	2.54e-07	4.32e-05	-25.6556	g929	Genebody	RhoGAPp190	XP_028519788.1 rho GTPase-activating protein 190 isoform X3 [Apis cerana]	Cellular Processes;Organismal Systems	Cellular community - eukaryotes;Immune system	ko04510//Focal adhesion;ko04670//Leukocyte transendothelial migration	K13709;K13709	GO:0005575//cellular_component;GO:0005737//cytoplasm	GO:0000166//nucleotide binding;GO:0001882//nucleoside binding;GO:0001883//purine nucleoside binding;GO:0003674//molecular_function;GO:0003725//double-stranded RNA binding;GO:0003824//catalytic activity;GO:0003924//GTPase activity;GO:0005096//GTPase activator activity;GO:0005102//receptor binding;GO:0005488//binding;GO:0005515//protein binding;GO:0005525//GTP binding;GO:0008047//enzyme activator a…	GO:0007154//cell communication;GO:0007165//signal transduction;GO:0007264//small GTPase mediated signal transduction;GO:0007265//Ras protein signal transduction;GO:0007266//Rho protein signal transduction;GO:0007275//multicellular organism development;GO:0007399//nervous system development;GO:0007414//axonal defasciculation;GO:0007415//defasciculation of motor neuron axon;GO:0007417//central nerv…
LG01	18579701	18579900	*	5.02e-21	7.59e-18	31.7961	g929	Genebody	RhoGAPp190	XP_028519788.1 rho GTPase-activating protein 190 isoform X3 [Apis cerana]	Cellular Processes;Organismal Systems	Cellular community - eukaryotes;Immune system	ko04510//Focal adhesion;ko04670//Leukocyte transendothelial migration	K13709;K13709	GO:0005575//cellular_component;GO:0005737//cytoplasm	GO:0000166//nucleotide binding;GO:0001882//nucleoside binding;GO:0001883//purine nucleoside binding;GO:0003674//molecular_function;GO:0003725//double-stranded RNA binding;GO:0003824//catalytic activity;GO:0003924//GTPase activity;GO:0005096//GTPase activator activity;GO:0005102//receptor binding;GO:0005488//binding;GO:0005515//protein binding;GO:0005525//GTP binding;GO:0008047//enzyme activator a…	GO:0007154//cell communication;GO:0007165//signal transduction;GO:0007264//small GTPase mediated signal transduction;GO:0007265//Ras protein signal transduction;GO:0007266//Rho protein signal transduction;GO:0007275//multicellular organism development;GO:0007399//nervous system development;GO:0007414//axonal defasciculation;GO:0007415//defasciculation of motor neuron axon;GO:0007417//central nerv…
LG01	18579801	18580000	*	1.44e-14	9.06e-12	26.448	g929	Genebody	RhoGAPp190	XP_028519788.1 rho GTPase-activating protein 190 isoform X3 [Apis cerana]	Cellular Processes;Organismal Systems	Cellular community - eukaryotes;Immune system	ko04510//Focal adhesion;ko04670//Leukocyte transendothelial migration	K13709;K13709	GO:0005575//cellular_component;GO:0005737//cytoplasm	GO:0000166//nucleotide binding;GO:0001882//nucleoside binding;GO:0001883//purine nucleoside binding;GO:0003674//molecular_function;GO:0003725//double-stranded RNA binding;GO:0003824//catalytic activity;GO:0003924//GTPase activity;GO:0005096//GTPase activator activity;GO:0005102//receptor binding;GO:0005488//binding;GO:0005515//protein binding;GO:0005525//GTP binding;GO:0008047//enzyme activator a…	GO:0007154//cell communication;GO:0007165//signal transduction;GO:0007264//small GTPase mediated signal transduction;GO:0007265//Ras protein signal transduction;GO:0007266//Rho protein signal transduction;GO:0007275//multicellular organism development;GO:0007399//nervous system development;GO:0007414//axonal defasciculation;GO:0007415//defasciculation of motor neuron axon;GO:0007417//central nerv…
LG01	18607201	18607400	*	3.12e-17	2.85e-14	-35.3509	g932	Genebody	Magi1	XP_016922683.1 membrane-associated guanylate kinase, WW and PDZ domain-containing protein 1 isoform X4 [Apis cerana]	-	-	-	-	GO:0005575//cellular_component;GO:0005623//cell;GO:0005886//plasma membrane;GO:0005912//adherens junction;GO:0015627//type II protein secretion system complex;GO:0016020//membrane;GO:0016327//apicolateral plasma membrane;GO:0030054//cell junction;GO:0030288//outer membrane-bounded periplasmic space;GO:0030424//axon;GO:0031594//neuromuscular junction;GO:0033267//axon part;GO:0042995//cell projecti…	GO:0003674//molecular_function;GO:0003824//catalytic activity;GO:0004252//serine-type endopeptidase activity;GO:0005102//receptor binding;GO:0005488//binding;GO:0005515//protein binding;GO:0008013//beta-catenin binding;GO:0008234//cysteine-type peptidase activity;GO:0008236//serine-type peptidase activity;GO:0008565//protein transporter activity;GO:0016301//kinase activity;GO:0016740//transferase…	GO:0003008//system process;GO:0006508//proteolysis;GO:0006793//phosphorus metabolic process;GO:0006796//phosphate-containing compound metabolic process;GO:0006950//response to stress;GO:0007610//behavior;GO:0007611//learning or memory;GO:0007612//learning;GO:0007613//memory;GO:0007616//long-term memory;GO:0008150//biological_process;GO:0008152//metabolic process;GO:0009987//cellular process;GO:00…
LG01	18607301	18607500	*	4.86e-23	9.19e-20	-32.8261	g932	Genebody	Magi1	XP_016922683.1 membrane-associated guanylate kinase, WW and PDZ domain-containing protein 1 isoform X4 [Apis cerana]	-	-	-	-	GO:0005575//cellular_component;GO:0005623//cell;GO:0005886//plasma membrane;GO:0005912//adherens junction;GO:0015627//type II protein secretion system complex;GO:0016020//membrane;GO:0016327//apicolateral plasma membrane;GO:0030054//cell junction;GO:0030288//outer membrane-bounded periplasmic space;GO:0030424//axon;GO:0031594//neuromuscular junction;GO:0033267//axon part;GO:0042995//cell projecti…	GO:0003674//molecular_function;GO:0003824//catalytic activity;GO:0004252//serine-type endopeptidase activity;GO:0005102//receptor binding;GO:0005488//binding;GO:0005515//protein binding;GO:0008013//beta-catenin binding;GO:0008234//cysteine-type peptidase activity;GO:0008236//serine-type peptidase activity;GO:0008565//protein transporter activity;GO:0016301//kinase activity;GO:0016740//transferase…	GO:0003008//system process;GO:0006508//proteolysis;GO:0006793//phosphorus metabolic process;GO:0006796//phosphate-containing compound metabolic process;GO:0006950//response to stress;GO:0007610//behavior;GO:0007611//learning or memory;GO:0007612//learning;GO:0007613//memory;GO:0007616//long-term memory;GO:0008150//biological_process;GO:0008152//metabolic process;GO:0009987//cellular process;GO:00…
LG01	18708901	18709100	*	4.33e-31	2.09e-27	34.5011	g945	Genebody	RBM10	XP_016922675.1 RNA-binding protein 5 isoform X1 [Apis cerana]	-	-	-	-	GO:0005575//cellular_component;GO:0005622//intracellular;GO:0005623//cell;GO:0005634//nucleus;GO:0005681//spliceosomal complex;GO:0032991//macromolecular complex;GO:0043226//organelle;GO:0043227//membrane-bounded organelle;GO:0043229//intracellular organelle;GO:0043231//intracellular membrane-bounded organelle;GO:0044422//organelle part;GO:0044424//intracellular part;GO:0044428//nuclear part;GO:0…	GO:0003674//molecular_function;GO:0003676//nucleic acid binding;GO:0003723//RNA binding;GO:0003729//mRNA binding;GO:0005488//binding;GO:0008270//zinc ion binding;GO:0043167//ion binding;GO:0043169//cation binding;GO:0046872//metal ion binding;GO:0046914//transition metal ion binding;GO:0097159//organic cyclic compound binding;GO:1901363//heterocyclic compound binding	GO:0000245//spliceosomal complex assembly;GO:0000375//RNA splicing, via transesterification reactions;GO:0000377//RNA splicing, via transesterification reactions with bulged adenosine as nucleophile;GO:0000381//regulation of alternative mRNA splicing, via spliceosome;GO:0000398//mRNA splicing, via spliceosome;GO:0006139//nucleobase-containing compound metabolic process;GO:0006396//RNA processing;…
LG01	18862901	18863100	*	1.25e-39	1.44e-35	43.3001	g955	Genebody	Hdgf	PBC29228.1 Hepatoma-derived growth factor [Apis cerana cerana]	-	-	-	-	GO:0000228//nuclear chromosome;GO:0000785//chromatin;GO:0000790//nuclear chromatin;GO:0000792//heterochromatin;GO:0005575//cellular_component;GO:0005622//intracellular;GO:0005623//cell;GO:0005634//nucleus;GO:0005654//nucleoplasm;GO:0005694//chromosome;GO:0005720//nuclear heterochromatin;GO:0005737//cytoplasm;GO:0005829//cytosol;GO:0031974//membrane-enclosed lumen;GO:0031981//nuclear lumen;GO:0034…	GO:0003674//molecular_function;GO:0003676//nucleic acid binding;GO:0003677//DNA binding;GO:0003682//chromatin binding;GO:0003690//double-stranded DNA binding;GO:0003712//transcription cofactor activity;GO:0003713//transcription coactivator activity;GO:0005488//binding;GO:0005515//protein binding;GO:0008134//transcription factor binding;GO:0033613//activating transcription factor binding;GO:009710…	GO:0000245//spliceosomal complex assembly;GO:0000375//RNA splicing, via transesterification reactions;GO:0000377//RNA splicing, via transesterification reactions with bulged adenosine as nucleophile;GO:0000395//mRNA 5'-splice site recognition;GO:0000398//mRNA splicing, via spliceosome;GO:0003008//system process;GO:0006139//nucleobase-containing compound metabolic process;GO:0006351//transcription…
LG01	18863001	18863200	*	2.76e-32	1.55e-28	39.3534	g955	Genebody	Hdgf	PBC29228.1 Hepatoma-derived growth factor [Apis cerana cerana]	-	-	-	-	GO:0000228//nuclear chromosome;GO:0000785//chromatin;GO:0000790//nuclear chromatin;GO:0000792//heterochromatin;GO:0005575//cellular_component;GO:0005622//intracellular;GO:0005623//cell;GO:0005634//nucleus;GO:0005654//nucleoplasm;GO:0005694//chromosome;GO:0005720//nuclear heterochromatin;GO:0005737//cytoplasm;GO:0005829//cytosol;GO:0031974//membrane-enclosed lumen;GO:0031981//nuclear lumen;GO:0034…	GO:0003674//molecular_function;GO:0003676//nucleic acid binding;GO:0003677//DNA binding;GO:0003682//chromatin binding;GO:0003690//double-stranded DNA binding;GO:0003712//transcription cofactor activity;GO:0003713//transcription coactivator activity;GO:0005488//binding;GO:0005515//protein binding;GO:0008134//transcription factor binding;GO:0033613//activating transcription factor binding;GO:009710…	GO:0000245//spliceosomal complex assembly;GO:0000375//RNA splicing, via transesterification reactions;GO:0000377//RNA splicing, via transesterification reactions with bulged adenosine as nucleophile;GO:0000395//mRNA 5'-splice site recognition;GO:0000398//mRNA splicing, via spliceosome;GO:0003008//system process;GO:0006139//nucleobase-containing compound metabolic process;GO:0006351//transcription…
LG01	19356901	19357100	*	9.87e-23	1.8e-19	32.9908	g981	Genebody	immp2l	PBC31040.1 Mitochondrial inner membrane protease subunit [Apis cerana cerana]	-	-	-	-	-	GO:0004252//serine-type endopeptidase activity	GO:0006465//signal peptide processing;GO:0009306//protein secretion;GO:0019430//removal of superoxide radicals
LG01	19807801	19808000	*	1.46e-09	3.97e-07	-26.6353	g1008	Genebody	PIK3R4	XP_016922541.1 phosphoinositide 3-kinase regulatory subunit 4 isoform X1 [Apis cerana]	Human Diseases;Human Diseases;Human Diseases;Cellular Processes;Environmental Information Processing;Human Diseases;Cellular Processes	Neurodegenerative diseases;Neurodegenerative diseases;Infectious diseases;Transport and catabolism;Signal transduction;Neurodegenerative disease;Transport and catabolism	ko05016//Huntington disease;ko05010//Alzheimer disease;ko05131//Shigellosis;ko04140//Autophagy - animal;ko04371//Apelin signaling pathway;ko05017//Spinocerebellar ataxia;ko04136//Autophagy - other eukaryotes	K08333;K08333;K08333;K08333;K08333;K08333;K08333	GO:0000322//storage vacuole;GO:0000323//lytic vacuole;GO:0000324//fungal-type vacuole;GO:0000329//fungal-type vacuole membrane;GO:0005575//cellular_component;GO:0005622//intracellular;GO:0005623//cell;GO:0005634//nucleus;GO:0005635//nuclear envelope;GO:0005643//nuclear pore;GO:0005737//cytoplasm;GO:0005739//mitochondrion;GO:0005768//endosome;GO:0005770//late endosome;GO:0005773//vacuole;GO:000577…	GO:0000166//nucleotide binding;GO:0003674//molecular_function;GO:0003824//catalytic activity;GO:0004672//protein kinase activity;GO:0004674//protein serine/threonine kinase activity;GO:0005488//binding;GO:0005515//protein binding;GO:0005524//ATP binding;GO:0008144//drug binding;GO:0016301//kinase activity;GO:0016303//1-phosphatidylinositol-3-kinase activity;GO:0016740//transferase activity;GO:001…	GO:0000011//vacuole inheritance;GO:0001894//tissue homeostasis;GO:0002165//instar larval or pupal development;GO:0002218//activation of innate immune response;GO:0002221//pattern recognition receptor signaling pathway;GO:0002224//toll-like receptor signaling pathway;GO:0002253//activation of immune response;GO:0002376//immune system process;GO:0002682//regulation of immune system process;GO:00026…
LG01	19843201	19843400	*	1.74e-21	2.78e-18	-40.0533	g1015	Genebody	IPO7	XP_006623176.1 importin-7 [Apis dorsata]	Environmental Information Processing	Signal transduction	ko04013//MAPK signaling pathway - fly	K20223	GO:0005575//cellular_component;GO:0005622//intracellular;GO:0005623//cell;GO:0005634//nucleus;GO:0005635//nuclear envelope;GO:0005643//nuclear pore;GO:0005654//nucleoplasm;GO:0005737//cytoplasm;GO:0005829//cytosol;GO:0005938//cell cortex;GO:0012505//endomembrane system;GO:0015030//Cajal body;GO:0016020//membrane;GO:0016021//integral component of membrane;GO:0016604//nuclear body;GO:0031224//intri…	GO:0000166//nucleotide binding;GO:0001882//nucleoside binding;GO:0001883//purine nucleoside binding;GO:0003674//molecular_function;GO:0003676//nucleic acid binding;GO:0003723//RNA binding;GO:0005049//nuclear export signal receptor activity;GO:0005215//transporter activity;GO:0005488//binding;GO:0005515//protein binding;GO:0005525//GTP binding;GO:0008536//Ran GTPase binding;GO:0008565//protein tra…	GO:0001654//eye development;GO:0001708//cell fate specification;GO:0001736//establishment of planar polarity;GO:0001738//morphogenesis of a polarized epithelium;GO:0001745//compound eye morphogenesis;GO:0001751//compound eye photoreceptor cell differentiation;GO:0001754//eye photoreceptor cell differentiation;GO:0002009//morphogenesis of an epithelium;GO:0002165//instar larval or pupal developmen…
LG01	19844401	19844600	*	1.81e-24	4.01e-21	28.6503	g1015	Genebody	IPO7	XP_006623176.1 importin-7 [Apis dorsata]	Environmental Information Processing	Signal transduction	ko04013//MAPK signaling pathway - fly	K20223	GO:0005575//cellular_component;GO:0005622//intracellular;GO:0005623//cell;GO:0005634//nucleus;GO:0005635//nuclear envelope;GO:0005643//nuclear pore;GO:0005654//nucleoplasm;GO:0005737//cytoplasm;GO:0005829//cytosol;GO:0005938//cell cortex;GO:0012505//endomembrane system;GO:0015030//Cajal body;GO:0016020//membrane;GO:0016021//integral component of membrane;GO:0016604//nuclear body;GO:0031224//intri…	GO:0000166//nucleotide binding;GO:0001882//nucleoside binding;GO:0001883//purine nucleoside binding;GO:0003674//molecular_function;GO:0003676//nucleic acid binding;GO:0003723//RNA binding;GO:0005049//nuclear export signal receptor activity;GO:0005215//transporter activity;GO:0005488//binding;GO:0005515//protein binding;GO:0005525//GTP binding;GO:0008536//Ran GTPase binding;GO:0008565//protein tra…	GO:0001654//eye development;GO:0001708//cell fate specification;GO:0001736//establishment of planar polarity;GO:0001738//morphogenesis of a polarized epithelium;GO:0001745//compound eye morphogenesis;GO:0001751//compound eye photoreceptor cell differentiation;GO:0001754//eye photoreceptor cell differentiation;GO:0002009//morphogenesis of an epithelium;GO:0002165//instar larval or pupal developmen…
LG01	20328301	20328500	*	3.38e-26	9.41e-23	28.7048	g1049	Genebody	--	XP_028525204.1 dystrophin isoform X3 [Apis cerana]	-	-	-	-	-	GO:0005515//protein binding	GO:0006457//protein folding
LG01	20328401	20328600	*	3.38e-26	9.41e-23	28.7048	g1049	Genebody	--	XP_028525204.1 dystrophin isoform X3 [Apis cerana]	-	-	-	-	-	GO:0005515//protein binding	GO:0006457//protein folding
LG01	21823001	21823200	*	3.36e-07	5.55e-05	25.7922	g1088	Genebody	abhd12	XP_016918867.1 monoacylglycerol lipase ABHD12 [Apis cerana]	-	-	-	-	GO:0005575//cellular_component;GO:0016020//membrane;GO:0016021//integral component of membrane;GO:0031224//intrinsic component of membrane;GO:0044425//membrane part	GO:0003674//molecular_function;GO:0003824//catalytic activity;GO:0008236//serine-type peptidase activity;GO:0016298//lipase activity;GO:0016787//hydrolase activity;GO:0016788//hydrolase activity, acting on ester bonds;GO:0047372//acylglycerol lipase activity;GO:0052689//carboxylic ester hydrolase activity;GO:0070205//2-succinyl-6-hydroxy-2,4-cyclohexadiene-1-carboxylate synthase activity	GO:0006508//proteolysis;GO:0006629//lipid metabolic process;GO:0006638//neutral lipid metabolic process;GO:0006639//acylglycerol metabolic process;GO:0008150//biological_process;GO:0008152//metabolic process;GO:0009056//catabolic process;GO:0009234//menaquinone biosynthetic process;GO:0009987//cellular process;GO:0016042//lipid catabolic process;GO:0044237//cellular metabolic process;GO:0044238//…
LG01	22023501	22023700	*	2.82e-10	8.77e-08	-28.0116	g1107	Genebody	CERT1	XP_016919194.1 collagen type IV alpha-3-binding protein isoform X1 [Apis cerana]	-	-	-	-	GO:0005575//cellular_component;GO:0005622//intracellular;GO:0005623//cell;GO:0005634//nucleus;GO:0005654//nucleoplasm;GO:0005737//cytoplasm;GO:0005739//mitochondrion;GO:0005783//endoplasmic reticulum;GO:0005789//endoplasmic reticulum membrane;GO:0005794//Golgi apparatus;GO:0005829//cytosol;GO:0005840//ribosome;GO:0012505//endomembrane system;GO:0016020//membrane;GO:0022626//cytosolic ribosome;GO:…	GO:0003674//molecular_function;GO:0003824//catalytic activity;GO:0005215//transporter activity;GO:0005319//lipid transporter activity;GO:0005488//binding;GO:0005543//phospholipid binding;GO:0008289//lipid binding;GO:0016301//kinase activity;GO:0016740//transferase activity;GO:0016772//transferase activity, transferring phosphorus-containing groups;GO:0033218//amide binding;GO:0035091//phosphatidy…	GO:0000902//cell morphogenesis;GO:0001701//in utero embryonic development;GO:0002376//immune system process;GO:0003007//heart morphogenesis;GO:0003008//system process;GO:0003012//muscle system process;GO:0006629//lipid metabolic process;GO:0006643//membrane lipid metabolic process;GO:0006665//sphingolipid metabolic process;GO:0006672//ceramide metabolic process;GO:0006793//phosphorus metabolic pr…
LG01	23804501	23804700	*	1.08e-16	9.14e-14	26.2772	g1192	Genebody	ROCK1	NP_001265264.1 Rho-associated, coiled-coil containing protein kinase 2 [Apis mellifera]	Human Diseases;Environmental Information Processing;Human Diseases;Human Diseases;Human Diseases;Environmental Information Processing;Human Diseases;Environmental Information Processing;Human Diseases;Cellular Processes;Cellular Processes;Organismal Systems;Organismal Systems;Cellular Processes;Organismal Systems;Human Diseases;Organismal Systems;Environmental Information Processing;Organismal Sy…	Cancers;Signal transduction;Infectious diseases;Infectious diseases;Cancers;Signal transduction;Infectious diseases;Signal transduction;Infectious diseases;Cellular community - eukaryotes;Cell motility;Endocrine system;Development;Cellular community - eukaryotes;Circulatory system;Infectious disease: bacterial;Immune system;Signal transduction;Immune system;Immune system	ko05200//Pathways in cancer;ko04024//cAMP signaling pathway;ko05131//Shigellosis;ko05132//Salmonella infection;ko05205//Proteoglycans in cancer;ko04022//cGMP - PKG signaling pathway;ko05163//Human cytomegalovirus infection;ko04310//Wnt signaling pathway;ko05130//Pathogenic Escherichia coli infection;ko04510//Focal adhesion;ko04810//Regulation of actin cytoskeleton;ko04921//Oxytocin signaling path…	K17388;K17388;K17388;K17388;K17388;K17388;K17388;K17388;K17388;K17388;K17388;K17388;K17388;K17388;K17388;K17388;K17388;K17388;K17388;K17388	GO:0005575//cellular_component;GO:0005622//intracellular;GO:0005623//cell;GO:0005634//nucleus;GO:0005737//cytoplasm;GO:0005856//cytoskeleton;GO:0005886//plasma membrane;GO:0005911//cell-cell junction;GO:0005912//adherens junction;GO:0005913//cell-cell adherens junction;GO:0005938//cell cortex;GO:0016020//membrane;GO:0030054//cell junction;GO:0032153//cell division site;GO:0032154//cleavage furrow…	GO:0000166//nucleotide binding;GO:0003674//molecular_function;GO:0003824//catalytic activity;GO:0004672//protein kinase activity;GO:0004674//protein serine/threonine kinase activity;GO:0005488//binding;GO:0005515//protein binding;GO:0005524//ATP binding;GO:0008144//drug binding;GO:0016301//kinase activity;GO:0016740//transferase activity;GO:0016772//transferase activity, transferring phosphorus-c…	GO:0000003//reproduction;GO:0000022//mitotic spindle elongation;GO:0000070//mitotic sister chromatid segregation;GO:0000226//microtubule cytoskeleton organization;GO:0000278//mitotic cell cycle;GO:0000280//nuclear division;GO:0000281//mitotic cytokinesis;GO:0000819//sister chromatid segregation;GO:0000902//cell morphogenesis;GO:0000904//cell morphogenesis involved in differentiation;GO:0000910//c…
LG01	23810201	23810400	*	1.32e-30	6.05e-27	-36.6319	g1193	Genebody	BTBD2	PBC30947.1 BTB/POZ domain-containing-B [Apis cerana cerana]	-	-	-	-	GO:0000151//ubiquitin ligase complex;GO:0005575//cellular_component;GO:0005622//intracellular;GO:0005623//cell;GO:0005737//cytoplasm;GO:0005829//cytosol;GO:0019005//SCF ubiquitin ligase complex;GO:0031461//cullin-RING ubiquitin ligase complex;GO:0032991//macromolecular complex;GO:0044424//intracellular part;GO:0044444//cytoplasmic part;GO:0044464//cell part;GO:1902494//catalytic complex;GO:199023…	GO:0003674//molecular_function;GO:0005488//binding;GO:0005515//protein binding;GO:0019899//enzyme binding;GO:0031625//ubiquitin protein ligase binding;GO:0044389//ubiquitin-like protein ligase binding	GO:0006508//proteolysis;GO:0006511//ubiquitin-dependent protein catabolic process;GO:0006807//nitrogen compound metabolic process;GO:0007275//multicellular organism development;GO:0007399//nervous system development;GO:0008150//biological_process;GO:0008152//metabolic process;GO:0009056//catabolic process;GO:0009057//macromolecule catabolic process;GO:0009987//cellular process;GO:0010498//proteas…
LG01	24212001	24212200	*	4.25e-10	1.28e-07	27.434	g1217	Genebody	USP12	PBC30970.1 Ubiquitin carboxyl-terminal hydrolase [Apis cerana cerana]	-	-	-	-	GO:0005575//cellular_component;GO:0005622//intracellular;GO:0005623//cell;GO:0005634//nucleus;GO:0005654//nucleoplasm;GO:0005737//cytoplasm;GO:0005768//endosome;GO:0005829//cytosol;GO:0012505//endomembrane system;GO:0030428//cell septum;GO:0031410//cytoplasmic vesicle;GO:0031974//membrane-enclosed lumen;GO:0031981//nuclear lumen;GO:0031982//vesicle;GO:0036477//somatodendritic compartment;GO:00430…	GO:0003674//molecular_function;GO:0003824//catalytic activity;GO:0004175//endopeptidase activity;GO:0004197//cysteine-type endopeptidase activity;GO:0004843//thiol-dependent ubiquitin-specific protease activity;GO:0005102//receptor binding;GO:0005488//binding;GO:0005515//protein binding;GO:0008233//peptidase activity;GO:0008234//cysteine-type peptidase activity;GO:0016787//hydrolase activity;GO:0…	GO:0000578//embryonic axis specification;GO:0002682//regulation of immune system process;GO:0002684//positive regulation of immune system process;GO:0003002//regionalization;GO:0006355//regulation of transcription, DNA-templated;GO:0006464//cellular protein modification process;GO:0006508//proteolysis;GO:0006511//ubiquitin-dependent protein catabolic process;GO:0006807//nitrogen compound metaboli…
LG01	24222201	24222400	*	8.45e-12	3.44e-09	-26.4329	g1221	Genebody	Srebf1	XP_016919128.1 sterol regulatory element-binding protein 1 isoform X1 [Apis cerana]	Human Diseases;Organismal Systems;Environmental Information Processing;Human Diseases	Endocrine and metabolic diseases;Endocrine system;Signal transduction;Endocrine and metabolic diseases	ko04932//Non-alcoholic fatty liver disease (NAFLD);ko04910//Insulin signaling pathway;ko04152//AMPK signaling pathway;ko04931//Insulin resistance	K07197;K07197;K07197;K07197	GO:0000228//nuclear chromosome;GO:0000785//chromatin;GO:0000790//nuclear chromatin;GO:0005575//cellular_component;GO:0005622//intracellular;GO:0005623//cell;GO:0005634//nucleus;GO:0005635//nuclear envelope;GO:0005694//chromosome;GO:0005737//cytoplasm;GO:0005783//endoplasmic reticulum;GO:0005789//endoplasmic reticulum membrane;GO:0012505//endomembrane system;GO:0016020//membrane;GO:0016021//integr…	GO:0000976//transcription regulatory region sequence-specific DNA binding;GO:0000977//RNA polymerase II regulatory region sequence-specific DNA binding;GO:0000978//RNA polymerase II core promoter proximal region sequence-specific DNA binding;GO:0000981//RNA polymerase II transcription factor activity, sequence-specific DNA binding;GO:0000982//transcription factor activity, RNA polymerase II core …	GO:0000122//negative regulation of transcription from RNA polymerase II promoter;GO:0000902//cell morphogenesis;GO:0001666//response to hypoxia;GO:0006082//organic acid metabolic process;GO:0006139//nucleobase-containing compound metabolic process;GO:0006351//transcription, DNA-templated;GO:0006355//regulation of transcription, DNA-templated;GO:0006357//regulation of transcription from RNA polyme…
LG01	24222301	24222500	*	1.64e-37	1.55e-33	-39.8495	g1221	Genebody	Srebf1	XP_016919128.1 sterol regulatory element-binding protein 1 isoform X1 [Apis cerana]	Human Diseases;Organismal Systems;Environmental Information Processing;Human Diseases	Endocrine and metabolic diseases;Endocrine system;Signal transduction;Endocrine and metabolic diseases	ko04932//Non-alcoholic fatty liver disease (NAFLD);ko04910//Insulin signaling pathway;ko04152//AMPK signaling pathway;ko04931//Insulin resistance	K07197;K07197;K07197;K07197	GO:0000228//nuclear chromosome;GO:0000785//chromatin;GO:0000790//nuclear chromatin;GO:0005575//cellular_component;GO:0005622//intracellular;GO:0005623//cell;GO:0005634//nucleus;GO:0005635//nuclear envelope;GO:0005694//chromosome;GO:0005737//cytoplasm;GO:0005783//endoplasmic reticulum;GO:0005789//endoplasmic reticulum membrane;GO:0012505//endomembrane system;GO:0016020//membrane;GO:0016021//integr…	GO:0000976//transcription regulatory region sequence-specific DNA binding;GO:0000977//RNA polymerase II regulatory region sequence-specific DNA binding;GO:0000978//RNA polymerase II core promoter proximal region sequence-specific DNA binding;GO:0000981//RNA polymerase II transcription factor activity, sequence-specific DNA binding;GO:0000982//transcription factor activity, RNA polymerase II core …	GO:0000122//negative regulation of transcription from RNA polymerase II promoter;GO:0000902//cell morphogenesis;GO:0001666//response to hypoxia;GO:0006082//organic acid metabolic process;GO:0006139//nucleobase-containing compound metabolic process;GO:0006351//transcription, DNA-templated;GO:0006355//regulation of transcription, DNA-templated;GO:0006357//regulation of transcription from RNA polyme…
LG01	24960101	24960300	*	2.04e-24	4.5e-21	33.3779	g1278	Genebody	Trl	PBC31808.1 Transcription factor GAGA [Apis cerana cerana]	-	-	-	-	GO:0000775//chromosome, centromeric region;GO:0000785//chromatin;GO:0000791//euchromatin;GO:0000792//heterochromatin;GO:0005575//cellular_component;GO:0005622//intracellular;GO:0005623//cell;GO:0005634//nucleus;GO:0005694//chromosome;GO:0005700//polytene chromosome;GO:0005721//pericentric heterochromatin;GO:0043226//organelle;GO:0043227//membrane-bounded organelle;GO:0043228//non-membrane-bounded…	GO:0003674//molecular_function;GO:0003676//nucleic acid binding;GO:0003677//DNA binding;GO:0003682//chromatin binding;GO:0003700//transcription factor activity, sequence-specific DNA binding;GO:0005488//binding;GO:0005515//protein binding;GO:0005524//ATP binding;GO:0008134//transcription factor binding;GO:0016818//hydrolase activity, acting on acid anhydrides, in phosphorus-containing anhydrides;…	GO:0000003//reproduction;GO:0000278//mitotic cell cycle;GO:0000280//nuclear division;GO:0001932//regulation of protein phosphorylation;GO:0001934//positive regulation of protein phosphorylation;GO:0002009//morphogenesis of an epithelium;GO:0002165//instar larval or pupal development;GO:0003006//developmental process involved in reproduction;GO:0006260//DNA replication;GO:0006323//DNA packaging;GO…
LG01	25062201	25062400	*	1.76e-24	3.9e-21	28.2676	g1292	Genebody	mtTFB1	XP_016918926.1 dimethyladenosine transferase 1, mitochondrial [Apis cerana]	-	-	-	-	GO:0005575//cellular_component;GO:0005622//intracellular;GO:0005623//cell;GO:0005737//cytoplasm;GO:0005739//mitochondrion;GO:0005759//mitochondrial matrix;GO:0009295//nucleoid;GO:0031974//membrane-enclosed lumen;GO:0042645//mitochondrial nucleoid;GO:0043226//organelle;GO:0043227//membrane-bounded organelle;GO:0043228//non-membrane-bounded organelle;GO:0043229//intracellular organelle;GO:0043231//…	GO:0000179//rRNA (adenine-N6,N6-)-dimethyltransferase activity;GO:0003674//molecular_function;GO:0003676//nucleic acid binding;GO:0003677//DNA binding;GO:0003712//transcription cofactor activity;GO:0003723//RNA binding;GO:0003824//catalytic activity;GO:0005488//binding;GO:0008168//methyltransferase activity;GO:0008170//N-methyltransferase activity;GO:0008171//O-methyltransferase activity;GO:00081…	GO:0000154//rRNA modification;GO:0000959//mitochondrial RNA metabolic process;GO:0001510//RNA methylation;GO:0006139//nucleobase-containing compound metabolic process;GO:0006351//transcription, DNA-templated;GO:0006355//regulation of transcription, DNA-templated;GO:0006364//rRNA processing;GO:0006366//transcription from RNA polymerase II promoter;GO:0006390//transcription from mitochondrial promo…
LG01	25062301	25062500	*	1.76e-24	3.9e-21	28.2676	g1292	Genebody	mtTFB1	XP_016918926.1 dimethyladenosine transferase 1, mitochondrial [Apis cerana]	-	-	-	-	GO:0005575//cellular_component;GO:0005622//intracellular;GO:0005623//cell;GO:0005737//cytoplasm;GO:0005739//mitochondrion;GO:0005759//mitochondrial matrix;GO:0009295//nucleoid;GO:0031974//membrane-enclosed lumen;GO:0042645//mitochondrial nucleoid;GO:0043226//organelle;GO:0043227//membrane-bounded organelle;GO:0043228//non-membrane-bounded organelle;GO:0043229//intracellular organelle;GO:0043231//…	GO:0000179//rRNA (adenine-N6,N6-)-dimethyltransferase activity;GO:0003674//molecular_function;GO:0003676//nucleic acid binding;GO:0003677//DNA binding;GO:0003712//transcription cofactor activity;GO:0003723//RNA binding;GO:0003824//catalytic activity;GO:0005488//binding;GO:0008168//methyltransferase activity;GO:0008170//N-methyltransferase activity;GO:0008171//O-methyltransferase activity;GO:00081…	GO:0000154//rRNA modification;GO:0000959//mitochondrial RNA metabolic process;GO:0001510//RNA methylation;GO:0006139//nucleobase-containing compound metabolic process;GO:0006351//transcription, DNA-templated;GO:0006355//regulation of transcription, DNA-templated;GO:0006364//rRNA processing;GO:0006366//transcription from RNA polymerase II promoter;GO:0006390//transcription from mitochondrial promo…
LG01	26764501	26764700	*	4.15e-20	5.55e-17	25.9193	g1335	Genebody	Aspscr1	XP_016922560.1 tether containing UBX domain for GLUT4 [Apis cerana]	-	-	-	-	GO:0005575//cellular_component;GO:0005622//intracellular;GO:0005623//cell;GO:0005634//nucleus;GO:0005654//nucleoplasm;GO:0005737//cytoplasm;GO:0005793//endoplasmic reticulum-Golgi intermediate compartment;GO:0005829//cytosol;GO:0005886//plasma membrane;GO:0009898//cytoplasmic side of plasma membrane;GO:0012505//endomembrane system;GO:0012506//vesicle membrane;GO:0016020//membrane;GO:0019898//extr…	GO:0003674//molecular_function;GO:0005488//binding;GO:0005515//protein binding;GO:0019899//enzyme binding;GO:0051117//ATPase binding	GO:0006508//proteolysis;GO:0006511//ubiquitin-dependent protein catabolic process;GO:0006807//nitrogen compound metabolic process;GO:0006810//transport;GO:0006886//intracellular protein transport;GO:0006950//response to stress;GO:0007165//signal transduction;GO:0008104//protein localization;GO:0008150//biological_process;GO:0008152//metabolic process;GO:0009056//catabolic process;GO:0009057//macr…
LG02	1534001	1534200	*	6.45e-18	6.43e-15	-34.6538	g1362	Genebody	DAPK3	XP_006558185.1 death-associated protein kinase 1 isoform X4 [Apis mellifera]	Human Diseases;Cellular Processes;Human Diseases	Cancers;Transport and catabolism;Cancers	ko05200//Pathways in cancer;ko04140//Autophagy - animal;ko05219//Bladder cancer	K08803;K08803;K08803	GO:0005575//cellular_component;GO:0005622//intracellular;GO:0005623//cell;GO:0005737//cytoplasm;GO:0005829//cytosol;GO:0005856//cytoskeleton;GO:0043226//organelle;GO:0043228//non-membrane-bounded organelle;GO:0043229//intracellular organelle;GO:0043232//intracellular non-membrane-bounded organelle;GO:0044424//intracellular part;GO:0044444//cytoplasmic part;GO:0044464//cell part	GO:0000166//nucleotide binding;GO:0001882//nucleoside binding;GO:0001883//purine nucleoside binding;GO:0003674//molecular_function;GO:0003824//catalytic activity;GO:0004672//protein kinase activity;GO:0004674//protein serine/threonine kinase activity;GO:0005488//binding;GO:0005515//protein binding;GO:0005524//ATP binding;GO:0005525//GTP binding;GO:0008144//drug binding;GO:0016301//kinase activity…	GO:0002376//immune system process;GO:0006464//cellular protein modification process;GO:0006468//protein phosphorylation;GO:0006793//phosphorus metabolic process;GO:0006796//phosphate-containing compound metabolic process;GO:0006807//nitrogen compound metabolic process;GO:0006915//apoptotic process;GO:0006950//response to stress;GO:0006952//defense response;GO:0006955//immune response;GO:0007154//…
LG02	1573701	1573900	*	1.63e-16	1.35e-13	31.2101	g1365	Genebody	mars1	PBC29010.1 Methionyl-tRNA synthetase, cytoplasmic [Apis cerana cerana]	Metabolism;Genetic Information Processing;Metabolism	Global and overview maps;Translation;Metabolism of other amino acids	ko01100//Metabolic pathways;ko00970//Aminoacyl-tRNA biosynthesis;ko00450//Selenocompound metabolism	K01874;K01874;K01874	GO:0005575//cellular_component;GO:0005622//intracellular;GO:0005623//cell;GO:0005634//nucleus;GO:0005730//nucleolus;GO:0005737//cytoplasm;GO:0005829//cytosol;GO:0016020//membrane;GO:0016021//integral component of membrane;GO:0017101//aminoacyl-tRNA synthetase multienzyme complex;GO:0017102//methionyl glutamyl tRNA synthetase complex;GO:0031224//intrinsic component of membrane;GO:0031974//membrane…	GO:0000049//tRNA binding;GO:0000166//nucleotide binding;GO:0003674//molecular_function;GO:0003676//nucleic acid binding;GO:0003723//RNA binding;GO:0003824//catalytic activity;GO:0004812//aminoacyl-tRNA ligase activity;GO:0004823//leucine-tRNA ligase activity;GO:0004825//methionine-tRNA ligase activity;GO:0004832//valine-tRNA ligase activity;GO:0005488//binding;GO:0005524//ATP binding;GO:0008144//…	GO:0002181//cytoplasmic translation;GO:0006082//organic acid metabolic process;GO:0006139//nucleobase-containing compound metabolic process;GO:0006351//transcription, DNA-templated;GO:0006355//regulation of transcription, DNA-templated;GO:0006356//regulation of transcription from RNA polymerase I promoter;GO:0006399//tRNA metabolic process;GO:0006412//translation;GO:0006418//tRNA aminoacylation f…
LG02	1851401	1851600	*	2.28e-19	2.76e-16	30.4	g1380	Genebody	AAEL005241	XP_006618883.1 lateral signaling target protein 2 homolog [Apis dorsata]	-	-	-	-	GO:0005575//cellular_component;GO:0005622//intracellular;GO:0005623//cell;GO:0005737//cytoplasm;GO:0005768//endosome;GO:0005769//early endosome;GO:0005829//cytosol;GO:0010008//endosome membrane;GO:0012505//endomembrane system;GO:0016020//membrane;GO:0031090//organelle membrane;GO:0031410//cytoplasmic vesicle;GO:0031901//early endosome membrane;GO:0031982//vesicle;GO:0043226//organelle;GO:0043227/…	GO:0003674//molecular_function;GO:0005488//binding;GO:0005543//phospholipid binding;GO:0008289//lipid binding;GO:0008812//choline dehydrogenase activity;GO:0016614//oxidoreductase activity, acting on CH-OH group of donors;GO:0032266//phosphatidylinositol-3-phosphate binding;GO:0035091//phosphatidylinositol binding;GO:0043167//ion binding;GO:0043168//anion binding;GO:0043169//cation binding;GO:004…	GO:0001932//regulation of protein phosphorylation;GO:0001933//negative regulation of protein phosphorylation;GO:0006469//negative regulation of protein kinase activity;GO:0007175//negative regulation of epidermal growth factor-activated receptor activity;GO:0007176//regulation of epidermal growth factor-activated receptor activity;GO:0008150//biological_process;GO:0009892//negative regulation of …
LG02	2202701	2202900	*	1.69e-23	3.41e-20	31.436	g1398	Genebody	UBE3A	PBC29038.1 Ubiquitin-protein ligase E3A [Apis cerana cerana]	Human Diseases;Genetic Information Processing;Human Diseases	Infectious diseases;Folding, sorting and degradation;Cancers	ko05165//Human papillomavirus infection;ko04120//Ubiquitin mediated proteolysis;ko05203//Viral carcinogenesis	K10587;K10587;K10587	GO:0000502//proteasome complex;GO:0005575//cellular_component;GO:0005622//intracellular;GO:0005623//cell;GO:0005634//nucleus;GO:0005737//cytoplasm;GO:0005829//cytosol;GO:0032991//macromolecular complex;GO:0043226//organelle;GO:0043227//membrane-bounded organelle;GO:0043229//intracellular organelle;GO:0043231//intracellular membrane-bounded organelle;GO:0044424//intracellular part;GO:0044444//cyto…	GO:0003674//molecular_function;GO:0003712//transcription cofactor activity;GO:0003713//transcription coactivator activity;GO:0003824//catalytic activity;GO:0004842//ubiquitin-protein transferase activity;GO:0005488//binding;GO:0016740//transferase activity;GO:0019787//ubiquitin-like protein transferase activity;GO:0043167//ion binding;GO:0043169//cation binding;GO:0046872//metal ion binding;GO:00…	GO:0000003//reproduction;GO:0000209//protein polyubiquitination;GO:0000302//response to reactive oxygen species;GO:0000902//cell morphogenesis;GO:0000904//cell morphogenesis involved in differentiation;GO:0001541//ovarian follicle development;GO:0001655//urogenital system development;GO:0003006//developmental process involved in reproduction;GO:0003008//system process;GO:0006355//regulation of tr…
LG02	2202801	2203000	*	8.58e-23	1.58e-19	34.5456	g1398	Genebody	UBE3A	PBC29038.1 Ubiquitin-protein ligase E3A [Apis cerana cerana]	Human Diseases;Genetic Information Processing;Human Diseases	Infectious diseases;Folding, sorting and degradation;Cancers	ko05165//Human papillomavirus infection;ko04120//Ubiquitin mediated proteolysis;ko05203//Viral carcinogenesis	K10587;K10587;K10587	GO:0000502//proteasome complex;GO:0005575//cellular_component;GO:0005622//intracellular;GO:0005623//cell;GO:0005634//nucleus;GO:0005737//cytoplasm;GO:0005829//cytosol;GO:0032991//macromolecular complex;GO:0043226//organelle;GO:0043227//membrane-bounded organelle;GO:0043229//intracellular organelle;GO:0043231//intracellular membrane-bounded organelle;GO:0044424//intracellular part;GO:0044444//cyto…	GO:0003674//molecular_function;GO:0003712//transcription cofactor activity;GO:0003713//transcription coactivator activity;GO:0003824//catalytic activity;GO:0004842//ubiquitin-protein transferase activity;GO:0005488//binding;GO:0016740//transferase activity;GO:0019787//ubiquitin-like protein transferase activity;GO:0043167//ion binding;GO:0043169//cation binding;GO:0046872//metal ion binding;GO:00…	GO:0000003//reproduction;GO:0000209//protein polyubiquitination;GO:0000302//response to reactive oxygen species;GO:0000902//cell morphogenesis;GO:0000904//cell morphogenesis involved in differentiation;GO:0001541//ovarian follicle development;GO:0001655//urogenital system development;GO:0003006//developmental process involved in reproduction;GO:0003008//system process;GO:0006355//regulation of tr…
LG02	2203401	2203600	*	7.56e-16	5.69e-13	37.3918	g1398	Genebody	UBE3A	PBC29038.1 Ubiquitin-protein ligase E3A [Apis cerana cerana]	Human Diseases;Genetic Information Processing;Human Diseases	Infectious diseases;Folding, sorting and degradation;Cancers	ko05165//Human papillomavirus infection;ko04120//Ubiquitin mediated proteolysis;ko05203//Viral carcinogenesis	K10587;K10587;K10587	GO:0000502//proteasome complex;GO:0005575//cellular_component;GO:0005622//intracellular;GO:0005623//cell;GO:0005634//nucleus;GO:0005737//cytoplasm;GO:0005829//cytosol;GO:0032991//macromolecular complex;GO:0043226//organelle;GO:0043227//membrane-bounded organelle;GO:0043229//intracellular organelle;GO:0043231//intracellular membrane-bounded organelle;GO:0044424//intracellular part;GO:0044444//cyto…	GO:0003674//molecular_function;GO:0003712//transcription cofactor activity;GO:0003713//transcription coactivator activity;GO:0003824//catalytic activity;GO:0004842//ubiquitin-protein transferase activity;GO:0005488//binding;GO:0016740//transferase activity;GO:0019787//ubiquitin-like protein transferase activity;GO:0043167//ion binding;GO:0043169//cation binding;GO:0046872//metal ion binding;GO:00…	GO:0000003//reproduction;GO:0000209//protein polyubiquitination;GO:0000302//response to reactive oxygen species;GO:0000902//cell morphogenesis;GO:0000904//cell morphogenesis involved in differentiation;GO:0001541//ovarian follicle development;GO:0001655//urogenital system development;GO:0003006//developmental process involved in reproduction;GO:0003008//system process;GO:0006355//regulation of tr…
LG02	4579901	4580100	*	1.9e-21	3.01e-18	29.9258	g1462	Genebody	PBRM1	PBC27958.1 Protein polybromo-1 [Apis cerana cerana]	Human Diseases	Cancers	ko05225//Hepatocellular carcinoma	K11757	GO:0000228//nuclear chromosome;GO:0000775//chromosome, centromeric region;GO:0000776//kinetochore;GO:0000785//chromatin;GO:0000790//nuclear chromatin;GO:0005575//cellular_component;GO:0005622//intracellular;GO:0005623//cell;GO:0005634//nucleus;GO:0005654//nucleoplasm;GO:0005694//chromosome;GO:0005700//polytene chromosome;GO:0016586//RSC complex;GO:0031974//membrane-enclosed lumen;GO:0031981//nucl…	GO:0003674//molecular_function;GO:0003676//nucleic acid binding;GO:0003677//DNA binding;GO:0003682//chromatin binding;GO:0005488//binding;GO:0005515//protein binding;GO:0097159//organic cyclic compound binding;GO:1901363//heterocyclic compound binding	GO:0000003//reproduction;GO:0000122//negative regulation of transcription from RNA polymerase II promoter;GO:0000278//mitotic cell cycle;GO:0001568//blood vessel development;GO:0001570//vasculogenesis;GO:0001890//placenta development;GO:0001944//vasculature development;GO:0001974//blood vessel remodeling;GO:0002009//morphogenesis of an epithelium;GO:0002064//epithelial cell development;GO:0002065…
LG02	4584901	4585100	*	3.07e-08	6.38e-06	26.4572	g1462	Genebody	PBRM1	PBC27958.1 Protein polybromo-1 [Apis cerana cerana]	Human Diseases	Cancers	ko05225//Hepatocellular carcinoma	K11757	GO:0000228//nuclear chromosome;GO:0000775//chromosome, centromeric region;GO:0000776//kinetochore;GO:0000785//chromatin;GO:0000790//nuclear chromatin;GO:0005575//cellular_component;GO:0005622//intracellular;GO:0005623//cell;GO:0005634//nucleus;GO:0005654//nucleoplasm;GO:0005694//chromosome;GO:0005700//polytene chromosome;GO:0016586//RSC complex;GO:0031974//membrane-enclosed lumen;GO:0031981//nucl…	GO:0003674//molecular_function;GO:0003676//nucleic acid binding;GO:0003677//DNA binding;GO:0003682//chromatin binding;GO:0005488//binding;GO:0005515//protein binding;GO:0097159//organic cyclic compound binding;GO:1901363//heterocyclic compound binding	GO:0000003//reproduction;GO:0000122//negative regulation of transcription from RNA polymerase II promoter;GO:0000278//mitotic cell cycle;GO:0001568//blood vessel development;GO:0001570//vasculogenesis;GO:0001890//placenta development;GO:0001944//vasculature development;GO:0001974//blood vessel remodeling;GO:0002009//morphogenesis of an epithelium;GO:0002064//epithelial cell development;GO:0002065…
LG02	4589001	4589200	*	1.71e-09	4.59e-07	-25.2054	g1462	Genebody	PBRM1	PBC27958.1 Protein polybromo-1 [Apis cerana cerana]	Human Diseases	Cancers	ko05225//Hepatocellular carcinoma	K11757	GO:0000228//nuclear chromosome;GO:0000775//chromosome, centromeric region;GO:0000776//kinetochore;GO:0000785//chromatin;GO:0000790//nuclear chromatin;GO:0005575//cellular_component;GO:0005622//intracellular;GO:0005623//cell;GO:0005634//nucleus;GO:0005654//nucleoplasm;GO:0005694//chromosome;GO:0005700//polytene chromosome;GO:0016586//RSC complex;GO:0031974//membrane-enclosed lumen;GO:0031981//nucl…	GO:0003674//molecular_function;GO:0003676//nucleic acid binding;GO:0003677//DNA binding;GO:0003682//chromatin binding;GO:0005488//binding;GO:0005515//protein binding;GO:0097159//organic cyclic compound binding;GO:1901363//heterocyclic compound binding	GO:0000003//reproduction;GO:0000122//negative regulation of transcription from RNA polymerase II promoter;GO:0000278//mitotic cell cycle;GO:0001568//blood vessel development;GO:0001570//vasculogenesis;GO:0001890//placenta development;GO:0001944//vasculature development;GO:0001974//blood vessel remodeling;GO:0002009//morphogenesis of an epithelium;GO:0002064//epithelial cell development;GO:0002065…
LG02	4589101	4589300	*	7.19e-11	2.5e-08	-29.5644	g1462	Genebody	PBRM1	PBC27958.1 Protein polybromo-1 [Apis cerana cerana]	Human Diseases	Cancers	ko05225//Hepatocellular carcinoma	K11757	GO:0000228//nuclear chromosome;GO:0000775//chromosome, centromeric region;GO:0000776//kinetochore;GO:0000785//chromatin;GO:0000790//nuclear chromatin;GO:0005575//cellular_component;GO:0005622//intracellular;GO:0005623//cell;GO:0005634//nucleus;GO:0005654//nucleoplasm;GO:0005694//chromosome;GO:0005700//polytene chromosome;GO:0016586//RSC complex;GO:0031974//membrane-enclosed lumen;GO:0031981//nucl…	GO:0003674//molecular_function;GO:0003676//nucleic acid binding;GO:0003677//DNA binding;GO:0003682//chromatin binding;GO:0005488//binding;GO:0005515//protein binding;GO:0097159//organic cyclic compound binding;GO:1901363//heterocyclic compound binding	GO:0000003//reproduction;GO:0000122//negative regulation of transcription from RNA polymerase II promoter;GO:0000278//mitotic cell cycle;GO:0001568//blood vessel development;GO:0001570//vasculogenesis;GO:0001890//placenta development;GO:0001944//vasculature development;GO:0001974//blood vessel remodeling;GO:0002009//morphogenesis of an epithelium;GO:0002064//epithelial cell development;GO:0002065…
LG02	4598001	4598200	*	2.29e-17	2.13e-14	27.0626	g1464	Genebody	Trf4-1	PBC27960.1 PAP-associated domain-containing protein [Apis cerana cerana]	Genetic Information Processing	Folding, sorting and degradation	ko03018//RNA degradation	K03514	GO:0005575//cellular_component;GO:0005622//intracellular;GO:0005623//cell;GO:0005634//nucleus;GO:0005730//nucleolus;GO:0005737//cytoplasm;GO:0005844//polysome;GO:0031499//TRAMP complex;GO:0031974//membrane-enclosed lumen;GO:0031981//nuclear lumen;GO:0032991//macromolecular complex;GO:0035770//ribonucleoprotein granule;GO:0036464//cytoplasmic ribonucleoprotein granule;GO:0043186//P granule;GO:0043…	GO:0000166//nucleotide binding;GO:0003674//molecular_function;GO:0003676//nucleic acid binding;GO:0003677//DNA binding;GO:0003723//RNA binding;GO:0003824//catalytic activity;GO:0003887//DNA-directed DNA polymerase activity;GO:0004652//polynucleotide adenylyltransferase activity;GO:0005488//binding;GO:0005524//ATP binding;GO:0008144//drug binding;GO:0016740//transferase activity;GO:0016772//transf…	GO:0000003//reproduction;GO:0000819//sister chromatid segregation;GO:0000956//nuclear-transcribed mRNA catabolic process;GO:0006139//nucleobase-containing compound metabolic process;GO:0006259//DNA metabolic process;GO:0006364//rRNA processing;GO:0006378//mRNA polyadenylation;GO:0006396//RNA processing;GO:0006397//mRNA processing;GO:0006399//tRNA metabolic process;GO:0006401//RNA catabolic proces…
LG02	4921601	4921800	*	7.12e-30	3.02e-26	-28.4834	g1480	Genebody	DCAF12	XP_003692325.1 DDB1- and CUL4-associated factor 12 isoform X2 [Apis florea]	-	-	-	-	GO:0000151//ubiquitin ligase complex;GO:0005575//cellular_component;GO:0005622//intracellular;GO:0005623//cell;GO:0005737//cytoplasm;GO:0005813//centrosome;GO:0005815//microtubule organizing center;GO:0005856//cytoskeleton;GO:0015630//microtubule cytoskeleton;GO:0031461//cullin-RING ubiquitin ligase complex;GO:0032991//macromolecular complex;GO:0043226//organelle;GO:0043228//non-membrane-bounded …	GO:0005515//protein binding	GO:0002165//instar larval or pupal development;GO:0006464//cellular protein modification process;GO:0006807//nitrogen compound metabolic process;GO:0007275//multicellular organism development;GO:0007431//salivary gland development;GO:0007435//salivary gland morphogenesis;GO:0007552//metamorphosis;GO:0008150//biological_process;GO:0008152//metabolic process;GO:0008219//cell death;GO:0009653//anato…
LG02	4921701	4921900	*	5.63e-26	1.51e-22	-28.78	g1480	Genebody	DCAF12	XP_003692325.1 DDB1- and CUL4-associated factor 12 isoform X2 [Apis florea]	-	-	-	-	GO:0000151//ubiquitin ligase complex;GO:0005575//cellular_component;GO:0005622//intracellular;GO:0005623//cell;GO:0005737//cytoplasm;GO:0005813//centrosome;GO:0005815//microtubule organizing center;GO:0005856//cytoskeleton;GO:0015630//microtubule cytoskeleton;GO:0031461//cullin-RING ubiquitin ligase complex;GO:0032991//macromolecular complex;GO:0043226//organelle;GO:0043228//non-membrane-bounded …	GO:0005515//protein binding	GO:0002165//instar larval or pupal development;GO:0006464//cellular protein modification process;GO:0006807//nitrogen compound metabolic process;GO:0007275//multicellular organism development;GO:0007431//salivary gland development;GO:0007435//salivary gland morphogenesis;GO:0007552//metamorphosis;GO:0008150//biological_process;GO:0008152//metabolic process;GO:0008219//cell death;GO:0009653//anato…
LG02	5041201	5041400	*	1.46e-35	1.15e-31	-32.716	g1493	Genebody	scra	PBC33786.1 Actin-binding protein anillin [Apis cerana cerana]	-	-	-	-	GO:0005575//cellular_component;GO:0005576//extracellular region;GO:0005622//intracellular;GO:0005623//cell;GO:0005634//nucleus;GO:0005654//nucleoplasm;GO:0005737//cytoplasm;GO:0005819//spindle;GO:0005826//actomyosin contractile ring;GO:0005856//cytoskeleton;GO:0005886//plasma membrane;GO:0005938//cell cortex;GO:0015629//actin cytoskeleton;GO:0015630//microtubule cytoskeleton;GO:0016020//membrane;…	GO:0003674//molecular_function;GO:0003779//actin binding;GO:0005488//binding;GO:0005515//protein binding;GO:0008017//microtubule binding;GO:0008092//cytoskeletal protein binding;GO:0015631//tubulin binding;GO:0016491//oxidoreductase activity;GO:0017016//Ras GTPase binding;GO:0017022//myosin binding;GO:0017048//Rho GTPase binding;GO:0017049//GTP-Rho binding;GO:0019899//enzyme binding;GO:0031267//s…	GO:0000003//reproduction;GO:0000278//mitotic cell cycle;GO:0000280//nuclear division;GO:0000281//mitotic cytokinesis;GO:0000910//cytokinesis;GO:0000912//assembly of actomyosin apparatus involved in cytokinesis;GO:0000915//actomyosin contractile ring assembly;GO:0000921//septin ring assembly;GO:0001667//ameboidal-type cell migration;GO:0002244//hematopoietic progenitor cell differentiation;GO:0002…
LG02	5041801	5042000	*	1.11e-20	1.61e-17	28.527	g1493	Genebody	scra	PBC33786.1 Actin-binding protein anillin [Apis cerana cerana]	-	-	-	-	GO:0005575//cellular_component;GO:0005576//extracellular region;GO:0005622//intracellular;GO:0005623//cell;GO:0005634//nucleus;GO:0005654//nucleoplasm;GO:0005737//cytoplasm;GO:0005819//spindle;GO:0005826//actomyosin contractile ring;GO:0005856//cytoskeleton;GO:0005886//plasma membrane;GO:0005938//cell cortex;GO:0015629//actin cytoskeleton;GO:0015630//microtubule cytoskeleton;GO:0016020//membrane;…	GO:0003674//molecular_function;GO:0003779//actin binding;GO:0005488//binding;GO:0005515//protein binding;GO:0008017//microtubule binding;GO:0008092//cytoskeletal protein binding;GO:0015631//tubulin binding;GO:0016491//oxidoreductase activity;GO:0017016//Ras GTPase binding;GO:0017022//myosin binding;GO:0017048//Rho GTPase binding;GO:0017049//GTP-Rho binding;GO:0019899//enzyme binding;GO:0031267//s…	GO:0000003//reproduction;GO:0000278//mitotic cell cycle;GO:0000280//nuclear division;GO:0000281//mitotic cytokinesis;GO:0000910//cytokinesis;GO:0000912//assembly of actomyosin apparatus involved in cytokinesis;GO:0000915//actomyosin contractile ring assembly;GO:0000921//septin ring assembly;GO:0001667//ameboidal-type cell migration;GO:0002244//hematopoietic progenitor cell differentiation;GO:0002…
LG02	5043801	5044000	*	8.29e-14	4.68e-11	26.1876	g1493	Genebody	scra	PBC33786.1 Actin-binding protein anillin [Apis cerana cerana]	-	-	-	-	GO:0005575//cellular_component;GO:0005576//extracellular region;GO:0005622//intracellular;GO:0005623//cell;GO:0005634//nucleus;GO:0005654//nucleoplasm;GO:0005737//cytoplasm;GO:0005819//spindle;GO:0005826//actomyosin contractile ring;GO:0005856//cytoskeleton;GO:0005886//plasma membrane;GO:0005938//cell cortex;GO:0015629//actin cytoskeleton;GO:0015630//microtubule cytoskeleton;GO:0016020//membrane;…	GO:0003674//molecular_function;GO:0003779//actin binding;GO:0005488//binding;GO:0005515//protein binding;GO:0008017//microtubule binding;GO:0008092//cytoskeletal protein binding;GO:0015631//tubulin binding;GO:0016491//oxidoreductase activity;GO:0017016//Ras GTPase binding;GO:0017022//myosin binding;GO:0017048//Rho GTPase binding;GO:0017049//GTP-Rho binding;GO:0019899//enzyme binding;GO:0031267//s…	GO:0000003//reproduction;GO:0000278//mitotic cell cycle;GO:0000280//nuclear division;GO:0000281//mitotic cytokinesis;GO:0000910//cytokinesis;GO:0000912//assembly of actomyosin apparatus involved in cytokinesis;GO:0000915//actomyosin contractile ring assembly;GO:0000921//septin ring assembly;GO:0001667//ameboidal-type cell migration;GO:0002244//hematopoietic progenitor cell differentiation;GO:0002…
LG02	5065101	5065300	*	6.88e-17	5.99e-14	27.0733	g1495	Genebody	DTNA	XP_016768256.1 dystrobrevin beta isoform X3 [Apis mellifera]	-	-	-	-	GO:0005575//cellular_component;GO:0005622//intracellular;GO:0005623//cell;GO:0005737//cytoplasm;GO:0005886//plasma membrane;GO:0016010//dystrophin-associated glycoprotein complex;GO:0016014//dystrobrevin complex;GO:0016020//membrane;GO:0032991//macromolecular complex;GO:0044424//intracellular part;GO:0044425//membrane part;GO:0044459//plasma membrane part;GO:0044464//cell part;GO:0071944//cell pe…	GO:0003674//molecular_function;GO:0005198//structural molecule activity;GO:0005215//transporter activity;GO:0005277//acetylcholine transmembrane transporter activity;GO:0005326//neurotransmitter transporter activity;GO:0005488//binding;GO:0005515//protein binding;GO:0008092//cytoskeletal protein binding;GO:0008270//zinc ion binding;GO:0008307//structural constituent of muscle;GO:0008324//cation t…	GO:0006810//transport;GO:0006811//ion transport;GO:0006812//cation transport;GO:0006836//neurotransmitter transport;GO:0006855//drug transmembrane transport;GO:0006996//organelle organization;GO:0007010//cytoskeleton organization;GO:0007154//cell communication;GO:0007267//cell-cell signaling;GO:0007268//synaptic transmission;GO:0007271//synaptic transmission, cholinergic;GO:0007528//neuromuscular…
LG02	5109401	5109600	*	4.01e-33	2.53e-29	-39.1892	g1499	Genebody	ATAD2	PBC33792.1 ATPase family AAA domain-containing protein [Apis cerana cerana]	-	-	-	-	GO:0005575//cellular_component;GO:0005622//intracellular;GO:0005623//cell;GO:0005634//nucleus;GO:0005737//cytoplasm;GO:0005783//endoplasmic reticulum;GO:0005789//endoplasmic reticulum membrane;GO:0005829//cytosol;GO:0012505//endomembrane system;GO:0016020//membrane;GO:0019898//extrinsic component of membrane;GO:0031090//organelle membrane;GO:0031312//extrinsic component of organelle membrane;GO:0…	GO:0000166//nucleotide binding;GO:0003674//molecular_function;GO:0003682//chromatin binding;GO:0003824//catalytic activity;GO:0005488//binding;GO:0005515//protein binding;GO:0005524//ATP binding;GO:0008144//drug binding;GO:0016462//pyrophosphatase activity;GO:0016787//hydrolase activity;GO:0016817//hydrolase activity, acting on acid anhydrides;GO:0016818//hydrolase activity, acting on acid anhydr…	GO:0000122//negative regulation of transcription from RNA polymerase II promoter;GO:0001672//regulation of chromatin assembly or disassembly;GO:0006139//nucleobase-containing compound metabolic process;GO:0006351//transcription, DNA-templated;GO:0006355//regulation of transcription, DNA-templated;GO:0006357//regulation of transcription from RNA polymerase II promoter;GO:0006725//cellular aromatic…
LG02	5113401	5113600	*	7.9e-14	4.47e-11	-30.4283	g1500	Genebody	ATAD2	PBC33792.1 ATPase family AAA domain-containing protein [Apis cerana cerana]	-	-	-	-	GO:0000502//proteasome complex;GO:0005575//cellular_component;GO:0005622//intracellular;GO:0005623//cell;GO:0005634//nucleus;GO:0009360//DNA polymerase III complex;GO:0009368//endopeptidase Clp complex;GO:0009379//Holliday junction helicase complex;GO:0043226//organelle;GO:0043227//membrane-bounded organelle;GO:0043229//intracellular organelle;GO:0043231//intracellular membrane-bounded organelle;…	GO:0000166//nucleotide binding;GO:0003674//molecular_function;GO:0003678//DNA helicase activity;GO:0003682//chromatin binding;GO:0003723//RNA binding;GO:0003724//RNA helicase activity;GO:0003824//catalytic activity;GO:0003887//DNA-directed DNA polymerase activity;GO:0004176//ATP-dependent peptidase activity;GO:0004222//metalloendopeptidase activity;GO:0004252//serine-type endopeptidase activity;G…	GO:0001522//pseudouridine synthesis;GO:0001672//regulation of chromatin assembly or disassembly;GO:0006139//nucleobase-containing compound metabolic process;GO:0006260//DNA replication;GO:0006281//DNA repair;GO:0006310//DNA recombination;GO:0006351//transcription, DNA-templated;GO:0006355//regulation of transcription, DNA-templated;GO:0006357//regulation of transcription from RNA polymerase II pr…
LG02	6187201	6187400	*	1.66e-20	2.33e-17	36.3148	g1524	Genebody	KHDC4	PBC30065.1 hypothetical protein APICC_02903 [Apis cerana cerana]	-	-	-	-	GO:0005575//cellular_component;GO:0005622//intracellular;GO:0005623//cell;GO:0005634//nucleus;GO:0005681//spliceosomal complex;GO:0005737//cytoplasm;GO:0032991//macromolecular complex;GO:0043226//organelle;GO:0043227//membrane-bounded organelle;GO:0043229//intracellular organelle;GO:0043231//intracellular membrane-bounded organelle;GO:0044422//organelle part;GO:0044424//intracellular part;GO:0044…	GO:0003674//molecular_function;GO:0003676//nucleic acid binding;GO:0003723//RNA binding;GO:0005488//binding;GO:0097159//organic cyclic compound binding;GO:1901363//heterocyclic compound binding	GO:0000245//spliceosomal complex assembly;GO:0000375//RNA splicing, via transesterification reactions;GO:0000377//RNA splicing, via transesterification reactions with bulged adenosine as nucleophile;GO:0000398//mRNA splicing, via spliceosome;GO:0006139//nucleobase-containing compound metabolic process;GO:0006376//mRNA splice site selection;GO:0006396//RNA processing;GO:0006397//mRNA processing;GO…
LG02	6793601	6793800	*	4.87e-13	2.42e-10	27.5833	g1554	Genebody	ARFGAP3	XP_016918180.1 ADP-ribosylation factor GTPase-activating protein 2 isoform X1 [Apis cerana]	Cellular Processes	Transport and catabolism	ko04144//Endocytosis	K12493	GO:0000139//Golgi membrane;GO:0005575//cellular_component;GO:0005622//intracellular;GO:0005623//cell;GO:0005737//cytoplasm;GO:0005793//endoplasmic reticulum-Golgi intermediate compartment;GO:0005794//Golgi apparatus;GO:0005798//Golgi-associated vesicle;GO:0009277//fungal-type cell wall;GO:0012505//endomembrane system;GO:0012506//vesicle membrane;GO:0016020//membrane;GO:0030117//membrane coat;GO:0…	GO:0003674//molecular_function;GO:0005096//GTPase activator activity;GO:0005488//binding;GO:0005515//protein binding;GO:0008047//enzyme activator activity;GO:0008270//zinc ion binding;GO:0030234//enzyme regulator activity;GO:0030695//GTPase regulator activity;GO:0043167//ion binding;GO:0043169//cation binding;GO:0046872//metal ion binding;GO:0050839//cell adhesion molecule binding;GO:0060589//nuc…	GO:0000752//agglutination involved in conjugation with cellular fusion;GO:0001654//eye development;GO:0001745//compound eye morphogenesis;GO:0006810//transport;GO:0006886//intracellular protein transport;GO:0006888//ER to Golgi vesicle-mediated transport;GO:0006890//retrograde vesicle-mediated transport, Golgi to ER;GO:0006900//membrane budding;GO:0006901//vesicle coating;GO:0006903//vesicle targ…
LG02	6793701	6793900	*	5.94e-18	5.96e-15	39.1112	g1554	Genebody	ARFGAP3	XP_016918180.1 ADP-ribosylation factor GTPase-activating protein 2 isoform X1 [Apis cerana]	Cellular Processes	Transport and catabolism	ko04144//Endocytosis	K12493	GO:0000139//Golgi membrane;GO:0005575//cellular_component;GO:0005622//intracellular;GO:0005623//cell;GO:0005737//cytoplasm;GO:0005793//endoplasmic reticulum-Golgi intermediate compartment;GO:0005794//Golgi apparatus;GO:0005798//Golgi-associated vesicle;GO:0009277//fungal-type cell wall;GO:0012505//endomembrane system;GO:0012506//vesicle membrane;GO:0016020//membrane;GO:0030117//membrane coat;GO:0…	GO:0003674//molecular_function;GO:0005096//GTPase activator activity;GO:0005488//binding;GO:0005515//protein binding;GO:0008047//enzyme activator activity;GO:0008270//zinc ion binding;GO:0030234//enzyme regulator activity;GO:0030695//GTPase regulator activity;GO:0043167//ion binding;GO:0043169//cation binding;GO:0046872//metal ion binding;GO:0050839//cell adhesion molecule binding;GO:0060589//nuc…	GO:0000752//agglutination involved in conjugation with cellular fusion;GO:0001654//eye development;GO:0001745//compound eye morphogenesis;GO:0006810//transport;GO:0006886//intracellular protein transport;GO:0006888//ER to Golgi vesicle-mediated transport;GO:0006890//retrograde vesicle-mediated transport, Golgi to ER;GO:0006900//membrane budding;GO:0006901//vesicle coating;GO:0006903//vesicle targ…
LG02	8137801	8138000	*	1.26e-12	5.82e-10	31.0811	g1588	Genebody	Bag6	PBC33475.1 Large proline-rich protein BAT3 [Apis cerana cerana]	-	-	-	-	GO:0005575//cellular_component;GO:0005576//extracellular region;GO:0005615//extracellular space;GO:0005622//intracellular;GO:0005623//cell;GO:0005634//nucleus;GO:0005654//nucleoplasm;GO:0005737//cytoplasm;GO:0005829//cytosol;GO:0016020//membrane;GO:0031974//membrane-enclosed lumen;GO:0031981//nuclear lumen;GO:0031982//vesicle;GO:0032991//macromolecular complex;GO:0043226//organelle;GO:0043227//me…	GO:0002020//protease binding;GO:0003674//molecular_function;GO:0005102//receptor binding;GO:0005488//binding;GO:0005515//protein binding;GO:0019899//enzyme binding;GO:0030544//Hsp70 protein binding;GO:0031072//heat shock protein binding;GO:0031593//polyubiquitin binding;GO:0031625//ubiquitin protein ligase binding;GO:0042802//identical protein binding;GO:0043021//ribonucleoprotein complex binding…	GO:0000003//reproduction;GO:0000280//nuclear division;GO:0001655//urogenital system development;GO:0001775//cell activation;GO:0001822//kidney development;GO:0002253//activation of immune response;GO:0002376//immune system process;GO:0002429//immune response-activating cell surface receptor signaling pathway;GO:0002474//antigen processing and presentation of peptide antigen via MHC class I;GO:000…
LG02	8311201	8311400	*	2e-14	1.23e-11	-26.6244	g1600	Genebody	SPAG9	PBC33487.1 JNK-interacting protein [Apis cerana cerana]	-	-	-	-	GO:0000139//Golgi membrane;GO:0005575//cellular_component;GO:0005622//intracellular;GO:0005623//cell;GO:0005737//cytoplasm;GO:0005794//Golgi apparatus;GO:0005798//Golgi-associated vesicle;GO:0012505//endomembrane system;GO:0016020//membrane;GO:0030133//transport vesicle;GO:0030135//coated vesicle;GO:0030136//clathrin-coated vesicle;GO:0030140//trans-Golgi network transport vesicle;GO:0030424//axo…	GO:0003674//molecular_function;GO:0005078//MAP-kinase scaffold activity;GO:0005198//structural molecule activity;GO:0005488//binding;GO:0005515//protein binding;GO:0005524//ATP binding;GO:0008092//cytoskeletal protein binding;GO:0008432//JUN kinase binding;GO:0019894//kinesin binding;GO:0019899//enzyme binding;GO:0019900//kinase binding;GO:0019901//protein kinase binding;GO:0030159//receptor sign…	GO:0000003//reproduction;GO:0000165//MAPK cascade;GO:0000187//activation of MAPK activity;GO:0001932//regulation of protein phosphorylation;GO:0001934//positive regulation of protein phosphorylation;GO:0003008//system process;GO:0006464//cellular protein modification process;GO:0006468//protein phosphorylation;GO:0006793//phosphorus metabolic process;GO:0006796//phosphate-containing compound meta…
LG02	8311301	8311500	*	1.71e-32	9.89e-29	-28.7522	g1600	Genebody	SPAG9	PBC33487.1 JNK-interacting protein [Apis cerana cerana]	-	-	-	-	GO:0000139//Golgi membrane;GO:0005575//cellular_component;GO:0005622//intracellular;GO:0005623//cell;GO:0005737//cytoplasm;GO:0005794//Golgi apparatus;GO:0005798//Golgi-associated vesicle;GO:0012505//endomembrane system;GO:0016020//membrane;GO:0030133//transport vesicle;GO:0030135//coated vesicle;GO:0030136//clathrin-coated vesicle;GO:0030140//trans-Golgi network transport vesicle;GO:0030424//axo…	GO:0003674//molecular_function;GO:0005078//MAP-kinase scaffold activity;GO:0005198//structural molecule activity;GO:0005488//binding;GO:0005515//protein binding;GO:0005524//ATP binding;GO:0008092//cytoskeletal protein binding;GO:0008432//JUN kinase binding;GO:0019894//kinesin binding;GO:0019899//enzyme binding;GO:0019900//kinase binding;GO:0019901//protein kinase binding;GO:0030159//receptor sign…	GO:0000003//reproduction;GO:0000165//MAPK cascade;GO:0000187//activation of MAPK activity;GO:0001932//regulation of protein phosphorylation;GO:0001934//positive regulation of protein phosphorylation;GO:0003008//system process;GO:0006464//cellular protein modification process;GO:0006468//protein phosphorylation;GO:0006793//phosphorus metabolic process;GO:0006796//phosphate-containing compound meta…
LG02	8769301	8769500	*	8.34e-26	2.16e-22	-25.3523	g1631	Genebody	Sra-1	XP_006613819.1 cytoplasmic FMR1-interacting protein [Apis dorsata]	Genetic Information Processing;Human Diseases;Human Diseases;Cellular Processes	Translation;Infectious diseases;Infectious diseases;Cell motility	ko03013//RNA transport;ko05132//Salmonella infection;ko05130//Pathogenic Escherichia coli infection;ko04810//Regulation of actin cytoskeleton	K05749;K05749;K05749;K05749	GO:0005575//cellular_component;GO:0005622//intracellular;GO:0005623//cell;GO:0005737//cytoplasm;GO:0030054//cell junction;GO:0031209//SCAR complex;GO:0032991//macromolecular complex;GO:0044424//intracellular part;GO:0044444//cytoplasmic part;GO:0044464//cell part;GO:0045177//apical part of cell;GO:0045202//synapse	GO:0003674//molecular_function;GO:0005488//binding;GO:0005515//protein binding;GO:0031267//small GTPase binding	GO:0000003//reproduction;GO:0000902//cell morphogenesis;GO:0000904//cell morphogenesis involved in differentiation;GO:0001654//eye development;GO:0001667//ameboidal-type cell migration;GO:0001745//compound eye morphogenesis;GO:0002064//epithelial cell development;GO:0002065//columnar/cuboidal epithelial cell differentiation;GO:0002066//columnar/cuboidal epithelial cell development;GO:0003006//dev…
LG02	8771501	8771700	*	8.06e-15	5.28e-12	33.2273	g1631	Genebody	Sra-1	XP_006613819.1 cytoplasmic FMR1-interacting protein [Apis dorsata]	Genetic Information Processing;Human Diseases;Human Diseases;Cellular Processes	Translation;Infectious diseases;Infectious diseases;Cell motility	ko03013//RNA transport;ko05132//Salmonella infection;ko05130//Pathogenic Escherichia coli infection;ko04810//Regulation of actin cytoskeleton	K05749;K05749;K05749;K05749	GO:0005575//cellular_component;GO:0005622//intracellular;GO:0005623//cell;GO:0005737//cytoplasm;GO:0030054//cell junction;GO:0031209//SCAR complex;GO:0032991//macromolecular complex;GO:0044424//intracellular part;GO:0044444//cytoplasmic part;GO:0044464//cell part;GO:0045177//apical part of cell;GO:0045202//synapse	GO:0003674//molecular_function;GO:0005488//binding;GO:0005515//protein binding;GO:0031267//small GTPase binding	GO:0000003//reproduction;GO:0000902//cell morphogenesis;GO:0000904//cell morphogenesis involved in differentiation;GO:0001654//eye development;GO:0001667//ameboidal-type cell migration;GO:0001745//compound eye morphogenesis;GO:0002064//epithelial cell development;GO:0002065//columnar/cuboidal epithelial cell differentiation;GO:0002066//columnar/cuboidal epithelial cell development;GO:0003006//dev…
LG02	8802501	8802700	*	7.43e-24	1.55e-20	40.4825	g1637	Genebody	svr	PBC33522.1 Carboxypeptidase D [Apis cerana cerana]	-	-	-	-	GO:0005575//cellular_component;GO:0005576//extracellular region;GO:0005615//extracellular space;GO:0005622//intracellular;GO:0005623//cell;GO:0005634//nucleus;GO:0005737//cytoplasm;GO:0005794//Golgi apparatus;GO:0005802//trans-Golgi network;GO:0005886//plasma membrane;GO:0012505//endomembrane system;GO:0016020//membrane;GO:0016021//integral component of membrane;GO:0031224//intrinsic component of…	GO:0003674//molecular_function;GO:0003824//catalytic activity;GO:0004180//carboxypeptidase activity;GO:0004181//metallocarboxypeptidase activity;GO:0004185//serine-type carboxypeptidase activity;GO:0005488//binding;GO:0005515//protein binding;GO:0008233//peptidase activity;GO:0008235//metalloexopeptidase activity;GO:0008236//serine-type peptidase activity;GO:0008237//metallopeptidase activity;GO:…	GO:0001932//regulation of protein phosphorylation;GO:0001933//negative regulation of protein phosphorylation;GO:0002009//morphogenesis of an epithelium;GO:0002165//instar larval or pupal development;GO:0003008//system process;GO:0006508//proteolysis;GO:0006518//peptide metabolic process;GO:0006807//nitrogen compound metabolic process;GO:0007275//multicellular organism development;GO:0007444//imag…
LG02	8802601	8802800	*	7.77e-19	8.78e-16	33.1966	g1637	Genebody	svr	PBC33522.1 Carboxypeptidase D [Apis cerana cerana]	-	-	-	-	GO:0005575//cellular_component;GO:0005576//extracellular region;GO:0005615//extracellular space;GO:0005622//intracellular;GO:0005623//cell;GO:0005634//nucleus;GO:0005737//cytoplasm;GO:0005794//Golgi apparatus;GO:0005802//trans-Golgi network;GO:0005886//plasma membrane;GO:0012505//endomembrane system;GO:0016020//membrane;GO:0016021//integral component of membrane;GO:0031224//intrinsic component of…	GO:0003674//molecular_function;GO:0003824//catalytic activity;GO:0004180//carboxypeptidase activity;GO:0004181//metallocarboxypeptidase activity;GO:0004185//serine-type carboxypeptidase activity;GO:0005488//binding;GO:0005515//protein binding;GO:0008233//peptidase activity;GO:0008235//metalloexopeptidase activity;GO:0008236//serine-type peptidase activity;GO:0008237//metallopeptidase activity;GO:…	GO:0001932//regulation of protein phosphorylation;GO:0001933//negative regulation of protein phosphorylation;GO:0002009//morphogenesis of an epithelium;GO:0002165//instar larval or pupal development;GO:0003008//system process;GO:0006508//proteolysis;GO:0006518//peptide metabolic process;GO:0006807//nitrogen compound metabolic process;GO:0007275//multicellular organism development;GO:0007444//imag…
LG02	8803301	8803500	*	1.15e-10	3.86e-08	25.2495	g1637	Genebody	svr	PBC33522.1 Carboxypeptidase D [Apis cerana cerana]	-	-	-	-	GO:0005575//cellular_component;GO:0005576//extracellular region;GO:0005615//extracellular space;GO:0005622//intracellular;GO:0005623//cell;GO:0005634//nucleus;GO:0005737//cytoplasm;GO:0005794//Golgi apparatus;GO:0005802//trans-Golgi network;GO:0005886//plasma membrane;GO:0012505//endomembrane system;GO:0016020//membrane;GO:0016021//integral component of membrane;GO:0031224//intrinsic component of…	GO:0003674//molecular_function;GO:0003824//catalytic activity;GO:0004180//carboxypeptidase activity;GO:0004181//metallocarboxypeptidase activity;GO:0004185//serine-type carboxypeptidase activity;GO:0005488//binding;GO:0005515//protein binding;GO:0008233//peptidase activity;GO:0008235//metalloexopeptidase activity;GO:0008236//serine-type peptidase activity;GO:0008237//metallopeptidase activity;GO:…	GO:0001932//regulation of protein phosphorylation;GO:0001933//negative regulation of protein phosphorylation;GO:0002009//morphogenesis of an epithelium;GO:0002165//instar larval or pupal development;GO:0003008//system process;GO:0006508//proteolysis;GO:0006518//peptide metabolic process;GO:0006807//nitrogen compound metabolic process;GO:0007275//multicellular organism development;GO:0007444//imag…
LG02	11670501	11670700	*	6.75e-16	5.12e-13	-33.4809	g1691	Genebody	skd	XP_016906356.1 mediator of RNA polymerase II transcription subunit 13 isoform X3 [Apis cerana]	Organismal Systems	Endocrine system	ko04919//Thyroid hormone signaling pathway	K15164	GO:0000428//DNA-directed RNA polymerase complex;GO:0005575//cellular_component;GO:0005622//intracellular;GO:0005623//cell;GO:0005634//nucleus;GO:0005654//nucleoplasm;GO:0005667//transcription factor complex;GO:0016020//membrane;GO:0016021//integral component of membrane;GO:0016591//DNA-directed RNA polymerase II, holoenzyme;GO:0016592//mediator complex;GO:0030880//RNA polymerase complex;GO:003122…	GO:0000988//transcription factor activity, protein binding;GO:0000989//transcription factor activity, transcription factor binding;GO:0001076//transcription factor activity, RNA polymerase II transcription factor binding;GO:0001134//transcription factor activity, transcription factor recruiting;GO:0001135//transcription factor activity, RNA polymerase II transcription factor recruiting;GO:0003674…	GO:0000122//negative regulation of transcription from RNA polymerase II promoter;GO:0000409//regulation of transcription by galactose;GO:0000411//positive regulation of transcription by galactose;GO:0000429//carbon catabolite regulation of transcription from RNA polymerase II promoter;GO:0000431//regulation of transcription from RNA polymerase II promoter by galactose;GO:0000435//positive regulat…
LG02	11670601	11670800	*	1.99e-19	2.42e-16	-42.368	g1691	Genebody	skd	XP_016906356.1 mediator of RNA polymerase II transcription subunit 13 isoform X3 [Apis cerana]	Organismal Systems	Endocrine system	ko04919//Thyroid hormone signaling pathway	K15164	GO:0000428//DNA-directed RNA polymerase complex;GO:0005575//cellular_component;GO:0005622//intracellular;GO:0005623//cell;GO:0005634//nucleus;GO:0005654//nucleoplasm;GO:0005667//transcription factor complex;GO:0016020//membrane;GO:0016021//integral component of membrane;GO:0016591//DNA-directed RNA polymerase II, holoenzyme;GO:0016592//mediator complex;GO:0030880//RNA polymerase complex;GO:003122…	GO:0000988//transcription factor activity, protein binding;GO:0000989//transcription factor activity, transcription factor binding;GO:0001076//transcription factor activity, RNA polymerase II transcription factor binding;GO:0001134//transcription factor activity, transcription factor recruiting;GO:0001135//transcription factor activity, RNA polymerase II transcription factor recruiting;GO:0003674…	GO:0000122//negative regulation of transcription from RNA polymerase II promoter;GO:0000409//regulation of transcription by galactose;GO:0000411//positive regulation of transcription by galactose;GO:0000429//carbon catabolite regulation of transcription from RNA polymerase II promoter;GO:0000431//regulation of transcription from RNA polymerase II promoter by galactose;GO:0000435//positive regulat…
LG02	12418101	12418300	*	2.21e-40	2.78e-36	47.0576	g1713	Genebody	DNApol-delta	XP_016906440.1 DNA polymerase delta catalytic subunit isoform X1 [Apis cerana]	Genetic Information Processing;Genetic Information Processing;Genetic Information Processing;Genetic Information Processing;Genetic Information Processing	Replication and repair;Replication and repair;Replication and repair;Replication and repair;Replication and repair	ko03030//DNA replication;ko03420//Nucleotide excision repair;ko03440//Homologous recombination;ko03410//Base excision repair;ko03430//Mismatch repair	K02327;K02327;K02327;K02327;K02327	GO:0000109//nucleotide-excision repair complex;GO:0000228//nuclear chromosome;GO:0000314//organellar small ribosomal subunit;GO:0000781//chromosome, telomeric region;GO:0000784//nuclear chromosome, telomeric region;GO:0005575//cellular_component;GO:0005622//intracellular;GO:0005623//cell;GO:0005634//nucleus;GO:0005654//nucleoplasm;GO:0005657//replication fork;GO:0005694//chromosome;GO:0005737//cy…	GO:0000166//nucleotide binding;GO:0003674//molecular_function;GO:0003676//nucleic acid binding;GO:0003677//DNA binding;GO:0003682//chromatin binding;GO:0003684//damaged DNA binding;GO:0003735//structural constituent of ribosome;GO:0003824//catalytic activity;GO:0003887//DNA-directed DNA polymerase activity;GO:0004518//nuclease activity;GO:0004527//exonuclease activity;GO:0004529//exodeoxyribonucl…	GO:0000278//mitotic cell cycle;GO:0000723//telomere maintenance;GO:0000731//DNA synthesis involved in DNA repair;GO:0006139//nucleobase-containing compound metabolic process;GO:0006259//DNA metabolic process;GO:0006260//DNA replication;GO:0006261//DNA-dependent DNA replication;GO:0006271//DNA strand elongation involved in DNA replication;GO:0006273//lagging strand elongation;GO:0006278//RNA-depen…
LG02	12418201	12418400	*	1.19e-26	3.5e-23	26.9035	g1713	Genebody	DNApol-delta	XP_016906440.1 DNA polymerase delta catalytic subunit isoform X1 [Apis cerana]	Genetic Information Processing;Genetic Information Processing;Genetic Information Processing;Genetic Information Processing;Genetic Information Processing	Replication and repair;Replication and repair;Replication and repair;Replication and repair;Replication and repair	ko03030//DNA replication;ko03420//Nucleotide excision repair;ko03440//Homologous recombination;ko03410//Base excision repair;ko03430//Mismatch repair	K02327;K02327;K02327;K02327;K02327	GO:0000109//nucleotide-excision repair complex;GO:0000228//nuclear chromosome;GO:0000314//organellar small ribosomal subunit;GO:0000781//chromosome, telomeric region;GO:0000784//nuclear chromosome, telomeric region;GO:0005575//cellular_component;GO:0005622//intracellular;GO:0005623//cell;GO:0005634//nucleus;GO:0005654//nucleoplasm;GO:0005657//replication fork;GO:0005694//chromosome;GO:0005737//cy…	GO:0000166//nucleotide binding;GO:0003674//molecular_function;GO:0003676//nucleic acid binding;GO:0003677//DNA binding;GO:0003682//chromatin binding;GO:0003684//damaged DNA binding;GO:0003735//structural constituent of ribosome;GO:0003824//catalytic activity;GO:0003887//DNA-directed DNA polymerase activity;GO:0004518//nuclease activity;GO:0004527//exonuclease activity;GO:0004529//exodeoxyribonucl…	GO:0000278//mitotic cell cycle;GO:0000723//telomere maintenance;GO:0000731//DNA synthesis involved in DNA repair;GO:0006139//nucleobase-containing compound metabolic process;GO:0006259//DNA metabolic process;GO:0006260//DNA replication;GO:0006261//DNA-dependent DNA replication;GO:0006271//DNA strand elongation involved in DNA replication;GO:0006273//lagging strand elongation;GO:0006278//RNA-depen…
LG02	12452901	12453100	*	3.85e-34	2.68e-30	26.3855	g1716	Genebody	TSNARE1	PBC32247.1 Syntaxin-12 [Apis cerana cerana]	-	-	-	-	GO:0005575//cellular_component;GO:0005622//intracellular;GO:0005623//cell;GO:0005737//cytoplasm;GO:0005840//ribosome;GO:0005886//plasma membrane;GO:0012505//endomembrane system;GO:0016020//membrane;GO:0016021//integral component of membrane;GO:0031201//SNARE complex;GO:0031224//intrinsic component of membrane;GO:0032991//macromolecular complex;GO:0044424//intracellular part;GO:0044425//membrane p…	GO:0000149//SNARE binding;GO:0003674//molecular_function;GO:0003735//structural constituent of ribosome;GO:0005484//SNAP receptor activity;GO:0005488//binding;GO:0005515//protein binding	GO:0000003//reproduction;GO:0000278//mitotic cell cycle;GO:0000280//nuclear division;GO:0001505//regulation of neurotransmitter levels;GO:0006412//translation;GO:0006810//transport;GO:0006836//neurotransmitter transport;GO:0006886//intracellular protein transport;GO:0006887//exocytosis;GO:0006904//vesicle docking involved in exocytosis;GO:0006906//vesicle fusion;GO:0006996//organelle organization…
LG02	12453001	12453200	*	5.39e-28	1.88e-24	28.555	g1716	Genebody	TSNARE1	PBC32247.1 Syntaxin-12 [Apis cerana cerana]	-	-	-	-	GO:0005575//cellular_component;GO:0005622//intracellular;GO:0005623//cell;GO:0005737//cytoplasm;GO:0005840//ribosome;GO:0005886//plasma membrane;GO:0012505//endomembrane system;GO:0016020//membrane;GO:0016021//integral component of membrane;GO:0031201//SNARE complex;GO:0031224//intrinsic component of membrane;GO:0032991//macromolecular complex;GO:0044424//intracellular part;GO:0044425//membrane p…	GO:0000149//SNARE binding;GO:0003674//molecular_function;GO:0003735//structural constituent of ribosome;GO:0005484//SNAP receptor activity;GO:0005488//binding;GO:0005515//protein binding	GO:0000003//reproduction;GO:0000278//mitotic cell cycle;GO:0000280//nuclear division;GO:0001505//regulation of neurotransmitter levels;GO:0006412//translation;GO:0006810//transport;GO:0006836//neurotransmitter transport;GO:0006886//intracellular protein transport;GO:0006887//exocytosis;GO:0006904//vesicle docking involved in exocytosis;GO:0006906//vesicle fusion;GO:0006996//organelle organization…
LG02	12465301	12465500	*	2.92e-13	1.51e-10	-30.0813	g1717	Genebody	Eif4g2	PBC32248.1 Eukaryotic translation initiation factor [Apis cerana cerana]	Genetic Information Processing;Human Diseases	Translation;Cardiovascular diseases	ko03013//RNA transport;ko05416//Viral myocarditis	K03260;K03260	GO:0005575//cellular_component;GO:0005622//intracellular;GO:0005623//cell;GO:0005737//cytoplasm;GO:0005829//cytosol;GO:0016281//eukaryotic translation initiation factor 4F complex;GO:0030424//axon;GO:0032991//macromolecular complex;GO:0042995//cell projection;GO:0043005//neuron projection;GO:0044424//intracellular part;GO:0044444//cytoplasmic part;GO:0044464//cell part;GO:0097458//neuron part	GO:0003674//molecular_function;GO:0003676//nucleic acid binding;GO:0003723//RNA binding;GO:0003729//mRNA binding;GO:0003743//translation initiation factor activity;GO:0005488//binding;GO:0005515//protein binding;GO:0008135//translation factor activity, RNA binding;GO:0097159//organic cyclic compound binding;GO:1901363//heterocyclic compound binding	GO:0001558//regulation of cell growth;GO:0006412//translation;GO:0006413//translational initiation;GO:0006417//regulation of translation;GO:0006446//regulation of translational initiation;GO:0006518//peptide metabolic process;GO:0006807//nitrogen compound metabolic process;GO:0007049//cell cycle;GO:0007050//cell cycle arrest;GO:0007275//multicellular organism development;GO:0007399//nervous syste…
LG02	12579801	12580000	*	1.11e-12	5.22e-10	25.7919	g1733	Genebody	CFAP70	PBC32265.1 Tetratricopeptide repeat protein [Apis cerana cerana]	-	-	-	-	GO:0005575//cellular_component;GO:0005623//cell;GO:0005929//cilium;GO:0031514//motile cilium;GO:0042995//cell projection;GO:0043226//organelle;GO:0044464//cell part	GO:0005515//protein binding	-
LG02	12675901	12676100	*	8.43e-21	1.24e-17	27.985	g1742	Genebody	larp	PBC32275.1 La-related protein [Apis cerana cerana]	-	-	-	-	GO:0000932//cytoplasmic mRNA processing body;GO:0005575//cellular_component;GO:0005622//intracellular;GO:0005623//cell;GO:0005737//cytoplasm;GO:0005739//mitochondrion;GO:0005829//cytosol;GO:0005844//polysome;GO:0032991//macromolecular complex;GO:0035770//ribonucleoprotein granule;GO:0036464//cytoplasmic ribonucleoprotein granule;GO:0043226//organelle;GO:0043227//membrane-bounded organelle;GO:0043…	GO:0003674//molecular_function;GO:0003676//nucleic acid binding;GO:0003723//RNA binding;GO:0003727//single-stranded RNA binding;GO:0005488//binding;GO:0008187//poly-pyrimidine tract binding;GO:0008266//poly(U) RNA binding;GO:0034046//poly(G) binding;GO:0070717//poly-purine tract binding;GO:0097159//organic cyclic compound binding;GO:1901363//heterocyclic compound binding	GO:0000001//mitochondrion inheritance;GO:0000003//reproduction;GO:0000212//meiotic spindle organization;GO:0000226//microtubule cytoskeleton organization;GO:0000278//mitotic cell cycle;GO:0000280//nuclear division;GO:0002181//cytoplasmic translation;GO:0003006//developmental process involved in reproduction;GO:0006412//translation;GO:0006518//peptide metabolic process;GO:0006807//nitrogen compoun…
LG02	12755701	12755900	*	1.12e-19	1.41e-16	25.9291	g1752	Genebody	CG7185	KOX77759.1 hypothetical protein WN51_10548 [Melipona quadrifasciata]	Genetic Information Processing	Translation	ko03015//mRNA surveillance pathway	K14398	GO:0000228//nuclear chromosome;GO:0000785//chromatin;GO:0000790//nuclear chromatin;GO:0005575//cellular_component;GO:0005622//intracellular;GO:0005623//cell;GO:0005634//nucleus;GO:0005654//nucleoplasm;GO:0005694//chromosome;GO:0005726//perichromatin fibrils;GO:0005737//cytoplasm;GO:0005847//mRNA cleavage and polyadenylation specificity factor complex;GO:0005849//mRNA cleavage factor complex;GO:00…	GO:0003674//molecular_function;GO:0003676//nucleic acid binding;GO:0003723//RNA binding;GO:0003729//mRNA binding;GO:0005488//binding;GO:0043021//ribonucleoprotein complex binding;GO:0043023//ribosomal large subunit binding;GO:0044877//macromolecular complex binding;GO:0097159//organic cyclic compound binding;GO:1901363//heterocyclic compound binding;GO:1990448//exon-exon junction complex binding	GO:0006139//nucleobase-containing compound metabolic process;GO:0006378//mRNA polyadenylation;GO:0006379//mRNA cleavage;GO:0006396//RNA processing;GO:0006397//mRNA processing;GO:0006725//cellular aromatic compound metabolic process;GO:0006807//nitrogen compound metabolic process;GO:0008150//biological_process;GO:0008152//metabolic process;GO:0009987//cellular process;GO:0010467//gene expression;G…
LG02	12755801	12756000	*	2.28e-41	3.11e-37	52.829	g1752	Genebody	CG7185	KOX77759.1 hypothetical protein WN51_10548 [Melipona quadrifasciata]	Genetic Information Processing	Translation	ko03015//mRNA surveillance pathway	K14398	GO:0000228//nuclear chromosome;GO:0000785//chromatin;GO:0000790//nuclear chromatin;GO:0005575//cellular_component;GO:0005622//intracellular;GO:0005623//cell;GO:0005634//nucleus;GO:0005654//nucleoplasm;GO:0005694//chromosome;GO:0005726//perichromatin fibrils;GO:0005737//cytoplasm;GO:0005847//mRNA cleavage and polyadenylation specificity factor complex;GO:0005849//mRNA cleavage factor complex;GO:00…	GO:0003674//molecular_function;GO:0003676//nucleic acid binding;GO:0003723//RNA binding;GO:0003729//mRNA binding;GO:0005488//binding;GO:0043021//ribonucleoprotein complex binding;GO:0043023//ribosomal large subunit binding;GO:0044877//macromolecular complex binding;GO:0097159//organic cyclic compound binding;GO:1901363//heterocyclic compound binding;GO:1990448//exon-exon junction complex binding	GO:0006139//nucleobase-containing compound metabolic process;GO:0006378//mRNA polyadenylation;GO:0006379//mRNA cleavage;GO:0006396//RNA processing;GO:0006397//mRNA processing;GO:0006725//cellular aromatic compound metabolic process;GO:0006807//nitrogen compound metabolic process;GO:0008150//biological_process;GO:0008152//metabolic process;GO:0009987//cellular process;GO:0010467//gene expression;G…
LG02	12755901	12756100	*	4.71e-36	3.95e-32	52.2689	g1752	Genebody	CG7185	KOX77759.1 hypothetical protein WN51_10548 [Melipona quadrifasciata]	Genetic Information Processing	Translation	ko03015//mRNA surveillance pathway	K14398	GO:0000228//nuclear chromosome;GO:0000785//chromatin;GO:0000790//nuclear chromatin;GO:0005575//cellular_component;GO:0005622//intracellular;GO:0005623//cell;GO:0005634//nucleus;GO:0005654//nucleoplasm;GO:0005694//chromosome;GO:0005726//perichromatin fibrils;GO:0005737//cytoplasm;GO:0005847//mRNA cleavage and polyadenylation specificity factor complex;GO:0005849//mRNA cleavage factor complex;GO:00…	GO:0003674//molecular_function;GO:0003676//nucleic acid binding;GO:0003723//RNA binding;GO:0003729//mRNA binding;GO:0005488//binding;GO:0043021//ribonucleoprotein complex binding;GO:0043023//ribosomal large subunit binding;GO:0044877//macromolecular complex binding;GO:0097159//organic cyclic compound binding;GO:1901363//heterocyclic compound binding;GO:1990448//exon-exon junction complex binding	GO:0006139//nucleobase-containing compound metabolic process;GO:0006378//mRNA polyadenylation;GO:0006379//mRNA cleavage;GO:0006396//RNA processing;GO:0006397//mRNA processing;GO:0006725//cellular aromatic compound metabolic process;GO:0006807//nitrogen compound metabolic process;GO:0008150//biological_process;GO:0008152//metabolic process;GO:0009987//cellular process;GO:0010467//gene expression;G…
LG02	12796001	12796200	*	7.14e-14	4.07e-11	30.2385	g1758	Genebody	Tubgcp2	PBC32292.1 Gamma-tubulin complex component [Apis cerana cerana]	-	-	-	-	GO:0000922//spindle pole;GO:0000923//equatorial microtubule organizing center;GO:0000930//gamma-tubulin complex;GO:0005575//cellular_component;GO:0005622//intracellular;GO:0005623//cell;GO:0005634//nucleus;GO:0005654//nucleoplasm;GO:0005737//cytoplasm;GO:0005813//centrosome;GO:0005815//microtubule organizing center;GO:0005816//spindle pole body;GO:0005819//spindle;GO:0005822//inner plaque of spin…	GO:0003674//molecular_function;GO:0003723//RNA binding;GO:0005198//structural molecule activity;GO:0005200//structural constituent of cytoskeleton;GO:0005488//binding;GO:0005515//protein binding;GO:0008017//microtubule binding;GO:0008092//cytoskeletal protein binding;GO:0015631//tubulin binding;GO:0043015//gamma-tubulin binding	GO:0000003//reproduction;GO:0000226//microtubule cytoskeleton organization;GO:0000278//mitotic cell cycle;GO:0000280//nuclear division;GO:0000281//mitotic cytokinesis;GO:0000910//cytokinesis;GO:0000917//barrier septum assembly;GO:0006396//RNA processing;GO:0006810//transport;GO:0006928//movement of cell or subcellular component;GO:0006996//organelle organization;GO:0007010//cytoskeleton organizat…
LG02	12813401	12813600	*	1.57e-10	5.14e-08	26.7669	g1761	Genebody	Smg5	PBC32295.1 hypothetical protein APICC_05997 [Apis cerana cerana]	Genetic Information Processing	Translation	ko03015//mRNA surveillance pathway	K11125	GO:0005575//cellular_component;GO:0005622//intracellular;GO:0005623//cell;GO:0005634//nucleus;GO:0005697//telomerase holoenzyme complex;GO:0005737//cytoplasm;GO:0005829//cytosol;GO:0032991//macromolecular complex;GO:0043226//organelle;GO:0043227//membrane-bounded organelle;GO:0043229//intracellular organelle;GO:0043231//intracellular membrane-bounded organelle;GO:0044422//organelle part;GO:004442…	GO:0003674//molecular_function;GO:0003676//nucleic acid binding;GO:0003677//DNA binding;GO:0003723//RNA binding;GO:0003824//catalytic activity;GO:0004518//nuclease activity;GO:0004540//ribonuclease activity;GO:0005488//binding;GO:0005515//protein binding;GO:0016787//hydrolase activity;GO:0016788//hydrolase activity, acting on ester bonds;GO:0019899//enzyme binding;GO:0019902//phosphatase binding;…	GO:0000184//nuclear-transcribed mRNA catabolic process, nonsense-mediated decay;GO:0000723//telomere maintenance;GO:0000956//nuclear-transcribed mRNA catabolic process;GO:0006139//nucleobase-containing compound metabolic process;GO:0006259//DNA metabolic process;GO:0006278//RNA-dependent DNA replication;GO:0006401//RNA catabolic process;GO:0006402//mRNA catabolic process;GO:0006403//RNA localizat…
LG02	13524101	13524300	*	3.36e-25	8.04e-22	-52.216	g1794	Genebody	alpha-Adaptin	PBC32319.1 AP-2 complex subunit alpha [Apis cerana cerana]	Human Diseases;Cellular Processes;Organismal Systems;Organismal Systems	Neurodegenerative diseases;Transport and catabolism;Nervous system;Excretory system	ko05016//Huntington disease;ko04144//Endocytosis;ko04721//Synaptic vesicle cycle;ko04961//Endocrine and other factor-regulated calcium reabsorption	K11824;K11824;K11824;K11824	GO:0005575//cellular_component;GO:0005622//intracellular;GO:0005623//cell;GO:0005737//cytoplasm;GO:0005886//plasma membrane;GO:0005905//coated pit;GO:0005933//cellular bud;GO:0005935//cellular bud neck;GO:0005938//cell cortex;GO:0012505//endomembrane system;GO:0012506//vesicle membrane;GO:0016020//membrane;GO:0030117//membrane coat;GO:0030118//clathrin coat;GO:0030119//AP-type membrane coat adapt…	GO:0003674//molecular_function;GO:0005215//transporter activity;GO:0005488//binding;GO:0005515//protein binding;GO:0008022//protein C-terminus binding;GO:0008289//lipid binding;GO:0008565//protein transporter activity;GO:0030276//clathrin binding;GO:0030674//protein binding, bridging;GO:0032794//GTPase activating protein binding;GO:0035615//clathrin adaptor activity;GO:0038024//cargo receptor act…	GO:0000003//reproduction;GO:0000278//mitotic cell cycle;GO:0000281//mitotic cytokinesis;GO:0000910//cytokinesis;GO:0002064//epithelial cell development;GO:0002065//columnar/cuboidal epithelial cell differentiation;GO:0002066//columnar/cuboidal epithelial cell development;GO:0003006//developmental process involved in reproduction;GO:0006810//transport;GO:0006886//intracellular protein transport;GO…
LG02	14274401	14274600	*	2.46e-15	1.72e-12	33.1337	g1819	Genebody	Gnl1	XP_016920907.1 guanine nucleotide-binding protein-like 1 isoform X1 [Apis cerana]	-	-	-	-	GO:0005575//cellular_component;GO:0005576//extracellular region;GO:0005615//extracellular space;GO:0005737//cytoplasm;GO:0044421//extracellular region part	GO:0000166//nucleotide binding;GO:0001882//nucleoside binding;GO:0001883//purine nucleoside binding;GO:0003674//molecular_function;GO:0003723//RNA binding;GO:0003724//RNA helicase activity;GO:0003824//catalytic activity;GO:0003924//GTPase activity;GO:0005198//structural molecule activity;GO:0005488//binding;GO:0005524//ATP binding;GO:0005525//GTP binding;GO:0015639//ferrous iron uptake transmembr…	GO:0002250//adaptive immune response;GO:0002252//immune effector process;GO:0002376//immune system process;GO:0002443//leukocyte mediated immunity;GO:0002449//lymphocyte mediated immunity;GO:0002456//T cell mediated immunity;GO:0002460//adaptive immune response based on somatic recombination of immune receptors built from immunoglobulin superfamily domains;GO:0006400//tRNA modification;GO:0006950…
LG02	14613401	14613600	*	2.83e-35	2.15e-31	39.4737	g1845	Genebody	DMXL2	XP_016915188.1 dmX-like protein 2 isoform X3 [Apis cerana]	-	-	-	-	GO:0005575//cellular_component;GO:0005622//intracellular;GO:0005623//cell;GO:0005737//cytoplasm;GO:0005768//endosome;GO:0005829//cytosol;GO:0010008//endosome membrane;GO:0012505//endomembrane system;GO:0016020//membrane;GO:0019898//extrinsic component of membrane;GO:0031090//organelle membrane;GO:0031410//cytoplasmic vesicle;GO:0031982//vesicle;GO:0032991//macromolecular complex;GO:0043226//organ…	GO:0003674//molecular_function;GO:0005488//binding;GO:0005515//protein binding;GO:0044877//macromolecular complex binding	GO:0006810//transport;GO:0006873//cellular ion homeostasis;GO:0006885//regulation of pH;GO:0007034//vacuolar transport;GO:0007035//vacuolar acidification;GO:0007275//multicellular organism development;GO:0007424//open tracheal system development;GO:0008104//protein localization;GO:0008150//biological_process;GO:0008593//regulation of Notch signaling pathway;GO:0009653//anatomical structure morpho…
LG02	14613501	14613700	*	8.55e-37	7.52e-33	39.4271	g1845	Genebody	DMXL2	XP_016915188.1 dmX-like protein 2 isoform X3 [Apis cerana]	-	-	-	-	GO:0005575//cellular_component;GO:0005622//intracellular;GO:0005623//cell;GO:0005737//cytoplasm;GO:0005768//endosome;GO:0005829//cytosol;GO:0010008//endosome membrane;GO:0012505//endomembrane system;GO:0016020//membrane;GO:0019898//extrinsic component of membrane;GO:0031090//organelle membrane;GO:0031410//cytoplasmic vesicle;GO:0031982//vesicle;GO:0032991//macromolecular complex;GO:0043226//organ…	GO:0003674//molecular_function;GO:0005488//binding;GO:0005515//protein binding;GO:0044877//macromolecular complex binding	GO:0006810//transport;GO:0006873//cellular ion homeostasis;GO:0006885//regulation of pH;GO:0007034//vacuolar transport;GO:0007035//vacuolar acidification;GO:0007275//multicellular organism development;GO:0007424//open tracheal system development;GO:0008104//protein localization;GO:0008150//biological_process;GO:0008593//regulation of Notch signaling pathway;GO:0009653//anatomical structure morpho…
LG02	14613801	14614000	*	1.14e-27	3.86e-24	34.1297	g1845	Genebody	DMXL2	XP_016915188.1 dmX-like protein 2 isoform X3 [Apis cerana]	-	-	-	-	GO:0005575//cellular_component;GO:0005622//intracellular;GO:0005623//cell;GO:0005737//cytoplasm;GO:0005768//endosome;GO:0005829//cytosol;GO:0010008//endosome membrane;GO:0012505//endomembrane system;GO:0016020//membrane;GO:0019898//extrinsic component of membrane;GO:0031090//organelle membrane;GO:0031410//cytoplasmic vesicle;GO:0031982//vesicle;GO:0032991//macromolecular complex;GO:0043226//organ…	GO:0003674//molecular_function;GO:0005488//binding;GO:0005515//protein binding;GO:0044877//macromolecular complex binding	GO:0006810//transport;GO:0006873//cellular ion homeostasis;GO:0006885//regulation of pH;GO:0007034//vacuolar transport;GO:0007035//vacuolar acidification;GO:0007275//multicellular organism development;GO:0007424//open tracheal system development;GO:0008104//protein localization;GO:0008150//biological_process;GO:0008593//regulation of Notch signaling pathway;GO:0009653//anatomical structure morpho…
LG02	14613901	14614100	*	2.77e-25	6.74e-22	39.9357	g1845	Genebody	DMXL2	XP_016915188.1 dmX-like protein 2 isoform X3 [Apis cerana]	-	-	-	-	GO:0005575//cellular_component;GO:0005622//intracellular;GO:0005623//cell;GO:0005737//cytoplasm;GO:0005768//endosome;GO:0005829//cytosol;GO:0010008//endosome membrane;GO:0012505//endomembrane system;GO:0016020//membrane;GO:0019898//extrinsic component of membrane;GO:0031090//organelle membrane;GO:0031410//cytoplasmic vesicle;GO:0031982//vesicle;GO:0032991//macromolecular complex;GO:0043226//organ…	GO:0003674//molecular_function;GO:0005488//binding;GO:0005515//protein binding;GO:0044877//macromolecular complex binding	GO:0006810//transport;GO:0006873//cellular ion homeostasis;GO:0006885//regulation of pH;GO:0007034//vacuolar transport;GO:0007035//vacuolar acidification;GO:0007275//multicellular organism development;GO:0007424//open tracheal system development;GO:0008104//protein localization;GO:0008150//biological_process;GO:0008593//regulation of Notch signaling pathway;GO:0009653//anatomical structure morpho…
LG02	14619001	14619200	*	1.37e-09	3.73e-07	-25.3837	g1845	Genebody	DMXL2	XP_016915188.1 dmX-like protein 2 isoform X3 [Apis cerana]	-	-	-	-	GO:0005575//cellular_component;GO:0005622//intracellular;GO:0005623//cell;GO:0005737//cytoplasm;GO:0005768//endosome;GO:0005829//cytosol;GO:0010008//endosome membrane;GO:0012505//endomembrane system;GO:0016020//membrane;GO:0019898//extrinsic component of membrane;GO:0031090//organelle membrane;GO:0031410//cytoplasmic vesicle;GO:0031982//vesicle;GO:0032991//macromolecular complex;GO:0043226//organ…	GO:0003674//molecular_function;GO:0005488//binding;GO:0005515//protein binding;GO:0044877//macromolecular complex binding	GO:0006810//transport;GO:0006873//cellular ion homeostasis;GO:0006885//regulation of pH;GO:0007034//vacuolar transport;GO:0007035//vacuolar acidification;GO:0007275//multicellular organism development;GO:0007424//open tracheal system development;GO:0008104//protein localization;GO:0008150//biological_process;GO:0008593//regulation of Notch signaling pathway;GO:0009653//anatomical structure morpho…
LG02	14619701	14619900	*	1.03e-22	1.87e-19	-27.027	g1845	Genebody	DMXL2	XP_016915188.1 dmX-like protein 2 isoform X3 [Apis cerana]	-	-	-	-	GO:0005575//cellular_component;GO:0005622//intracellular;GO:0005623//cell;GO:0005737//cytoplasm;GO:0005768//endosome;GO:0005829//cytosol;GO:0010008//endosome membrane;GO:0012505//endomembrane system;GO:0016020//membrane;GO:0019898//extrinsic component of membrane;GO:0031090//organelle membrane;GO:0031410//cytoplasmic vesicle;GO:0031982//vesicle;GO:0032991//macromolecular complex;GO:0043226//organ…	GO:0003674//molecular_function;GO:0005488//binding;GO:0005515//protein binding;GO:0044877//macromolecular complex binding	GO:0006810//transport;GO:0006873//cellular ion homeostasis;GO:0006885//regulation of pH;GO:0007034//vacuolar transport;GO:0007035//vacuolar acidification;GO:0007275//multicellular organism development;GO:0007424//open tracheal system development;GO:0008104//protein localization;GO:0008150//biological_process;GO:0008593//regulation of Notch signaling pathway;GO:0009653//anatomical structure morpho…
LG02	14619901	14620100	*	4.75e-11	1.71e-08	-25.6385	g1845	Genebody	DMXL2	XP_016915188.1 dmX-like protein 2 isoform X3 [Apis cerana]	-	-	-	-	GO:0005575//cellular_component;GO:0005622//intracellular;GO:0005623//cell;GO:0005737//cytoplasm;GO:0005768//endosome;GO:0005829//cytosol;GO:0010008//endosome membrane;GO:0012505//endomembrane system;GO:0016020//membrane;GO:0019898//extrinsic component of membrane;GO:0031090//organelle membrane;GO:0031410//cytoplasmic vesicle;GO:0031982//vesicle;GO:0032991//macromolecular complex;GO:0043226//organ…	GO:0003674//molecular_function;GO:0005488//binding;GO:0005515//protein binding;GO:0044877//macromolecular complex binding	GO:0006810//transport;GO:0006873//cellular ion homeostasis;GO:0006885//regulation of pH;GO:0007034//vacuolar transport;GO:0007035//vacuolar acidification;GO:0007275//multicellular organism development;GO:0007424//open tracheal system development;GO:0008104//protein localization;GO:0008150//biological_process;GO:0008593//regulation of Notch signaling pathway;GO:0009653//anatomical structure morpho…
LG02	14626301	14626500	*	1.64e-53	7.6e-49	32.6548	g1845	Genebody	DMXL2	XP_016915188.1 dmX-like protein 2 isoform X3 [Apis cerana]	-	-	-	-	GO:0005575//cellular_component;GO:0005622//intracellular;GO:0005623//cell;GO:0005737//cytoplasm;GO:0005768//endosome;GO:0005829//cytosol;GO:0010008//endosome membrane;GO:0012505//endomembrane system;GO:0016020//membrane;GO:0019898//extrinsic component of membrane;GO:0031090//organelle membrane;GO:0031410//cytoplasmic vesicle;GO:0031982//vesicle;GO:0032991//macromolecular complex;GO:0043226//organ…	GO:0003674//molecular_function;GO:0005488//binding;GO:0005515//protein binding;GO:0044877//macromolecular complex binding	GO:0006810//transport;GO:0006873//cellular ion homeostasis;GO:0006885//regulation of pH;GO:0007034//vacuolar transport;GO:0007035//vacuolar acidification;GO:0007275//multicellular organism development;GO:0007424//open tracheal system development;GO:0008104//protein localization;GO:0008150//biological_process;GO:0008593//regulation of Notch signaling pathway;GO:0009653//anatomical structure morpho…
LG02	15306401	15306600	*	8.77e-08	1.65e-05	-27.4596	g1877	Genebody	RPL7A	PBC28447.1 60S ribosomal protein L7a [Apis cerana cerana]	Genetic Information Processing	Translation	ko03010//Ribosome	K02936	GO:0005575//cellular_component;GO:0005622//intracellular;GO:0005623//cell;GO:0005737//cytoplasm;GO:0005829//cytosol;GO:0005840//ribosome;GO:0005844//polysome;GO:0015934//large ribosomal subunit;GO:0016020//membrane;GO:0022625//cytosolic large ribosomal subunit;GO:0022626//cytosolic ribosome;GO:0032991//macromolecular complex;GO:0042788//polysomal ribosome;GO:0043226//organelle;GO:0043228//non-mem…	GO:0003674//molecular_function;GO:0003676//nucleic acid binding;GO:0003723//RNA binding;GO:0003735//structural constituent of ribosome;GO:0005198//structural molecule activity;GO:0005488//binding;GO:0070402//NADPH binding;GO:0097159//organic cyclic compound binding;GO:1901363//heterocyclic compound binding	GO:0000184//nuclear-transcribed mRNA catabolic process, nonsense-mediated decay;GO:0000470//maturation of LSU-rRNA;GO:0000956//nuclear-transcribed mRNA catabolic process;GO:0002181//cytoplasmic translation;GO:0006139//nucleobase-containing compound metabolic process;GO:0006364//rRNA processing;GO:0006396//RNA processing;GO:0006401//RNA catabolic process;GO:0006402//mRNA catabolic process;GO:00064…
LG02	15306501	15306700	*	8.77e-08	1.65e-05	-27.4596	g1877	Genebody	RPL7A	PBC28447.1 60S ribosomal protein L7a [Apis cerana cerana]	Genetic Information Processing	Translation	ko03010//Ribosome	K02936	GO:0005575//cellular_component;GO:0005622//intracellular;GO:0005623//cell;GO:0005737//cytoplasm;GO:0005829//cytosol;GO:0005840//ribosome;GO:0005844//polysome;GO:0015934//large ribosomal subunit;GO:0016020//membrane;GO:0022625//cytosolic large ribosomal subunit;GO:0022626//cytosolic ribosome;GO:0032991//macromolecular complex;GO:0042788//polysomal ribosome;GO:0043226//organelle;GO:0043228//non-mem…	GO:0003674//molecular_function;GO:0003676//nucleic acid binding;GO:0003723//RNA binding;GO:0003735//structural constituent of ribosome;GO:0005198//structural molecule activity;GO:0005488//binding;GO:0070402//NADPH binding;GO:0097159//organic cyclic compound binding;GO:1901363//heterocyclic compound binding	GO:0000184//nuclear-transcribed mRNA catabolic process, nonsense-mediated decay;GO:0000470//maturation of LSU-rRNA;GO:0000956//nuclear-transcribed mRNA catabolic process;GO:0002181//cytoplasmic translation;GO:0006139//nucleobase-containing compound metabolic process;GO:0006364//rRNA processing;GO:0006396//RNA processing;GO:0006401//RNA catabolic process;GO:0006402//mRNA catabolic process;GO:00064…
LG02	15309301	15309500	*	1.94e-13	1.03e-10	-28.9364	g1878	Genebody	Vps53	XP_016915219.1 vacuolar protein sorting-associated protein 53 homolog [Apis cerana]	-	-	-	-	GO:0000139//Golgi membrane;GO:0000938//GARP complex;GO:0005575//cellular_component;GO:0005622//intracellular;GO:0005623//cell;GO:0005737//cytoplasm;GO:0005768//endosome;GO:0005794//Golgi apparatus;GO:0005802//trans-Golgi network;GO:0005829//cytosol;GO:0010008//endosome membrane;GO:0012505//endomembrane system;GO:0016020//membrane;GO:0019028//viral capsid;GO:0019031//viral envelope;GO:0031090//org…	GO:0003674//molecular_function;GO:0005198//structural molecule activity;GO:0005488//binding;GO:0005515//protein binding	GO:0000003//reproduction;GO:0006810//transport;GO:0006886//intracellular protein transport;GO:0006892//post-Golgi vesicle-mediated transport;GO:0006896//Golgi to vacuole transport;GO:0007034//vacuolar transport;GO:0007041//lysosomal transport;GO:0007155//cell adhesion;GO:0008104//protein localization;GO:0008150//biological_process;GO:0009987//cellular process;GO:0015031//protein transport;GO:0015…
LG02	15350601	15350800	*	1.22e-11	4.84e-09	-25.1608	g1881	Genebody	Prkag2	PBC28451.1 5'-AMP-activated protein kinase subunit gamma-2 [Apis cerana cerana]	Organismal Systems;Human Diseases;Organismal Systems;Organismal Systems;Environmental Information Processing;Cellular Processes;Environmental Information Processing;Organismal Systems;Environmental Information Processing;Human Diseases;Organismal Systems;Human Diseases;Organismal Systems;Organismal Systems;Organismal Systems	Environmental adaptation;Endocrine and metabolic diseases;Endocrine system;Endocrine system;Signal transduction;Cellular community - eukaryotes;Signal transduction;Endocrine system;Signal transduction;Cardiovascular diseases;Aging;Endocrine and metabolic diseases;Aging;Endocrine system;Environmental adaptation	ko04714//Thermogenesis;ko04932//Non-alcoholic fatty liver disease (NAFLD);ko04910//Insulin signaling pathway;ko04921//Oxytocin signaling pathway;ko04371//Apelin signaling pathway;ko04530//Tight junction;ko04152//AMPK signaling pathway;ko04922//Glucagon signaling pathway;ko04068//FoxO signaling pathway;ko05410//Hypertrophic cardiomyopathy (HCM);ko04213//Longevity regulating pathway - multiple spec…	K07200;K07200;K07200;K07200;K07200;K07200;K07200;K07200;K07200;K07200;K07200;K07200;K07200;K07200;K07200	GO:0005575//cellular_component;GO:0005622//intracellular;GO:0005623//cell;GO:0005634//nucleus;GO:0005635//nuclear envelope;GO:0005641//nuclear envelope lumen;GO:0005737//cytoplasm;GO:0005829//cytosol;GO:0005886//plasma membrane;GO:0009898//cytoplasmic side of plasma membrane;GO:0012505//endomembrane system;GO:0016020//membrane;GO:0031588//nucleotide-activated protein kinase complex;GO:0031967//or…	GO:0000166//nucleotide binding;GO:0003674//molecular_function;GO:0003824//catalytic activity;GO:0003938//IMP dehydrogenase activity;GO:0004122//cystathionine beta-synthase activity;GO:0004672//protein kinase activity;GO:0004674//protein serine/threonine kinase activity;GO:0004679//AMP-activated protein kinase activity;GO:0005488//binding;GO:0005515//protein binding;GO:0005524//ATP binding;GO:0008…	GO:0001302//replicative cell aging;GO:0001932//regulation of protein phosphorylation;GO:0001934//positive regulation of protein phosphorylation;GO:0005975//carbohydrate metabolic process;GO:0006109//regulation of carbohydrate metabolic process;GO:0006111//regulation of gluconeogenesis;GO:0006139//nucleobase-containing compound metabolic process;GO:0006351//transcription, DNA-templated;GO:0006355/…
LG02	15462401	15462600	*	9.96e-28	3.37e-24	-40.8369	g1889	Genebody	ASZ1	XP_028523387.1 ankyrin repeat, SAM and basic leucine zipper domain-containing protein 1 isoform X1 [Apis cerana]	-	-	-	-	GO:0005575//cellular_component;GO:0005622//intracellular;GO:0005623//cell;GO:0005737//cytoplasm;GO:0005739//mitochondrion;GO:0005829//cytosol;GO:0032991//macromolecular complex;GO:0035770//ribonucleoprotein granule;GO:0036464//cytoplasmic ribonucleoprotein granule;GO:0043186//P granule;GO:0043226//organelle;GO:0043227//membrane-bounded organelle;GO:0043228//non-membrane-bounded organelle;GO:00432…	GO:0005515//protein binding	GO:0000003//reproduction;GO:0000280//nuclear division;GO:0003006//developmental process involved in reproduction;GO:0006139//nucleobase-containing compound metabolic process;GO:0006259//DNA metabolic process;GO:0006304//DNA modification;GO:0006305//DNA alkylation;GO:0006306//DNA methylation;GO:0006725//cellular aromatic compound metabolic process;GO:0006807//nitrogen compound metabolic process;GO…
LG02	15462501	15462700	*	4.32e-24	9.22e-21	-35.0515	g1889	Genebody	ASZ1	XP_028523387.1 ankyrin repeat, SAM and basic leucine zipper domain-containing protein 1 isoform X1 [Apis cerana]	-	-	-	-	GO:0005575//cellular_component;GO:0005622//intracellular;GO:0005623//cell;GO:0005737//cytoplasm;GO:0005739//mitochondrion;GO:0005829//cytosol;GO:0032991//macromolecular complex;GO:0035770//ribonucleoprotein granule;GO:0036464//cytoplasmic ribonucleoprotein granule;GO:0043186//P granule;GO:0043226//organelle;GO:0043227//membrane-bounded organelle;GO:0043228//non-membrane-bounded organelle;GO:00432…	GO:0005515//protein binding	GO:0000003//reproduction;GO:0000280//nuclear division;GO:0003006//developmental process involved in reproduction;GO:0006139//nucleobase-containing compound metabolic process;GO:0006259//DNA metabolic process;GO:0006304//DNA modification;GO:0006305//DNA alkylation;GO:0006306//DNA methylation;GO:0006725//cellular aromatic compound metabolic process;GO:0006807//nitrogen compound metabolic process;GO…
LG02	15470401	15470600	*	2.86e-17	2.62e-14	-29.9369	g1890	Genebody	Zmynd11	PBC28460.1 Zinc finger MYND domain-containing protein [Apis cerana cerana]	-	-	-	-	GO:0005575//cellular_component;GO:0005622//intracellular;GO:0005623//cell;GO:0005634//nucleus;GO:0005654//nucleoplasm;GO:0005694//chromosome;GO:0031974//membrane-enclosed lumen;GO:0031981//nuclear lumen;GO:0043226//organelle;GO:0043227//membrane-bounded organelle;GO:0043228//non-membrane-bounded organelle;GO:0043229//intracellular organelle;GO:0043231//intracellular membrane-bounded organelle;GO:…	GO:0000976//transcription regulatory region sequence-specific DNA binding;GO:0000977//RNA polymerase II regulatory region sequence-specific DNA binding;GO:0001012//RNA polymerase II regulatory region DNA binding;GO:0001067//regulatory region nucleic acid binding;GO:0003674//molecular_function;GO:0003676//nucleic acid binding;GO:0003677//DNA binding;GO:0003682//chromatin binding;GO:0003690//double…	GO:0000122//negative regulation of transcription from RNA polymerase II promoter;GO:0001932//regulation of protein phosphorylation;GO:0001933//negative regulation of protein phosphorylation;GO:0002252//immune effector process;GO:0002376//immune system process;GO:0006139//nucleobase-containing compound metabolic process;GO:0006325//chromatin organization;GO:0006351//transcription, DNA-templated;GO…
LG02	15508201	15508400	*	5.2e-11	1.86e-08	-28.3992	g1893	Genebody	Eif4g3	XP_016915132.1 eukaryotic translation initiation factor 4 gamma 3 isoform X2 [Apis cerana]	Genetic Information Processing;Human Diseases	Translation;Cardiovascular diseases	ko03013//RNA transport;ko05416//Viral myocarditis	K03260;K03260	GO:0005575//cellular_component;GO:0005622//intracellular;GO:0005623//cell;GO:0005634//nucleus;GO:0005737//cytoplasm;GO:0005829//cytosol;GO:0010494//cytoplasmic stress granule;GO:0016281//eukaryotic translation initiation factor 4F complex;GO:0032991//macromolecular complex;GO:0035770//ribonucleoprotein granule;GO:0036464//cytoplasmic ribonucleoprotein granule;GO:0043226//organelle;GO:0043227//mem…	GO:0003674//molecular_function;GO:0003676//nucleic acid binding;GO:0003723//RNA binding;GO:0003743//translation initiation factor activity;GO:0005198//structural molecule activity;GO:0005488//binding;GO:0005515//protein binding;GO:0008135//translation factor activity, RNA binding;GO:0097159//organic cyclic compound binding;GO:1901363//heterocyclic compound binding	GO:0002181//cytoplasmic translation;GO:0002183//cytoplasmic translational initiation;GO:0006412//translation;GO:0006413//translational initiation;GO:0006518//peptide metabolic process;GO:0006807//nitrogen compound metabolic process;GO:0008150//biological_process;GO:0008152//metabolic process;GO:0009058//biosynthetic process;GO:0009059//macromolecule biosynthetic process;GO:0009987//cellular proce…
LG02	15511001	15511200	*	1.23e-21	2.01e-18	35.0951	g1893	Genebody	Eif4g3	XP_016915132.1 eukaryotic translation initiation factor 4 gamma 3 isoform X2 [Apis cerana]	Genetic Information Processing;Human Diseases	Translation;Cardiovascular diseases	ko03013//RNA transport;ko05416//Viral myocarditis	K03260;K03260	GO:0005575//cellular_component;GO:0005622//intracellular;GO:0005623//cell;GO:0005634//nucleus;GO:0005737//cytoplasm;GO:0005829//cytosol;GO:0010494//cytoplasmic stress granule;GO:0016281//eukaryotic translation initiation factor 4F complex;GO:0032991//macromolecular complex;GO:0035770//ribonucleoprotein granule;GO:0036464//cytoplasmic ribonucleoprotein granule;GO:0043226//organelle;GO:0043227//mem…	GO:0003674//molecular_function;GO:0003676//nucleic acid binding;GO:0003723//RNA binding;GO:0003743//translation initiation factor activity;GO:0005198//structural molecule activity;GO:0005488//binding;GO:0005515//protein binding;GO:0008135//translation factor activity, RNA binding;GO:0097159//organic cyclic compound binding;GO:1901363//heterocyclic compound binding	GO:0002181//cytoplasmic translation;GO:0002183//cytoplasmic translational initiation;GO:0006412//translation;GO:0006413//translational initiation;GO:0006518//peptide metabolic process;GO:0006807//nitrogen compound metabolic process;GO:0008150//biological_process;GO:0008152//metabolic process;GO:0009058//biosynthetic process;GO:0009059//macromolecule biosynthetic process;GO:0009987//cellular proce…
LG02	15559201	15559400	*	4.75e-19	5.55e-16	25.8929	g1903	Genebody	--	PBC28474.1 Sodium channel protein Nach [Apis cerana cerana]	-	-	-	-	GO:0005575//cellular_component;GO:0016020//membrane;GO:0016021//integral component of membrane;GO:0031224//intrinsic component of membrane;GO:0044425//membrane part	GO:0003674//molecular_function;GO:0005215//transporter activity;GO:0005216//ion channel activity;GO:0005261//cation channel activity;GO:0005272//sodium channel activity;GO:0008324//cation transmembrane transporter activity;GO:0015075//ion transmembrane transporter activity;GO:0015077//monovalent inorganic cation transmembrane transporter activity;GO:0015081//sodium ion transmembrane transporter a…	GO:0006810//transport;GO:0006811//ion transport;GO:0006812//cation transport;GO:0006814//sodium ion transport;GO:0008150//biological_process;GO:0010646//regulation of cell communication;GO:0015672//monovalent inorganic cation transport;GO:0023051//regulation of signaling;GO:0030001//metal ion transport;GO:0034220//ion transmembrane transport;GO:0035725//sodium ion transmembrane transport;GO:00507…
LG02	15650501	15650700	*	8.81e-28	3.01e-24	-37.3671	g1911	Genebody	EMSY	PBC28482.1 hypothetical protein APICC_08293 [Apis cerana cerana]	-	-	-	-	GO:0000118//histone deacetylase complex;GO:0000228//nuclear chromosome;GO:0000785//chromatin;GO:0000790//nuclear chromatin;GO:0005575//cellular_component;GO:0005622//intracellular;GO:0005623//cell;GO:0005634//nucleus;GO:0005654//nucleoplasm;GO:0005694//chromosome;GO:0031974//membrane-enclosed lumen;GO:0031981//nuclear lumen;GO:0032991//macromolecular complex;GO:0043226//organelle;GO:0043227//memb…	GO:0003674//molecular_function;GO:0005488//binding;GO:0005515//protein binding;GO:0042802//identical protein binding;GO:0042803//protein homodimerization activity;GO:0046983//protein dimerization activity	GO:0006139//nucleobase-containing compound metabolic process;GO:0006259//DNA metabolic process;GO:0006281//DNA repair;GO:0006325//chromatin organization;GO:0006351//transcription, DNA-templated;GO:0006355//regulation of transcription, DNA-templated;GO:0006725//cellular aromatic compound metabolic process;GO:0006807//nitrogen compound metabolic process;GO:0006950//response to stress;GO:0006974//ce…
LG02	15650601	15650800	*	1.83e-20	2.56e-17	-30.0906	g1911	Genebody	EMSY	PBC28482.1 hypothetical protein APICC_08293 [Apis cerana cerana]	-	-	-	-	GO:0000118//histone deacetylase complex;GO:0000228//nuclear chromosome;GO:0000785//chromatin;GO:0000790//nuclear chromatin;GO:0005575//cellular_component;GO:0005622//intracellular;GO:0005623//cell;GO:0005634//nucleus;GO:0005654//nucleoplasm;GO:0005694//chromosome;GO:0031974//membrane-enclosed lumen;GO:0031981//nuclear lumen;GO:0032991//macromolecular complex;GO:0043226//organelle;GO:0043227//memb…	GO:0003674//molecular_function;GO:0005488//binding;GO:0005515//protein binding;GO:0042802//identical protein binding;GO:0042803//protein homodimerization activity;GO:0046983//protein dimerization activity	GO:0006139//nucleobase-containing compound metabolic process;GO:0006259//DNA metabolic process;GO:0006281//DNA repair;GO:0006325//chromatin organization;GO:0006351//transcription, DNA-templated;GO:0006355//regulation of transcription, DNA-templated;GO:0006725//cellular aromatic compound metabolic process;GO:0006807//nitrogen compound metabolic process;GO:0006950//response to stress;GO:0006974//ce…
LG02	15803001	15803200	*	3.59e-11	1.32e-08	-27.0729	g1935	Genebody	CD109	XP_016914353.2 CD109 antigen [Apis cerana]	-	-	-	-	GO:0005575//cellular_component;GO:0005576//extracellular region;GO:0005615//extracellular space;GO:0005622//intracellular;GO:0005623//cell;GO:0005737//cytoplasm;GO:0005886//plasma membrane;GO:0012505//endomembrane system;GO:0012506//vesicle membrane;GO:0016020//membrane;GO:0030141//secretory granule;GO:0030659//cytoplasmic vesicle membrane;GO:0030667//secretory granule membrane;GO:0031090//organe…	GO:0003674//molecular_function;GO:0004857//enzyme inhibitor activity;GO:0004866//endopeptidase inhibitor activity;GO:0004867//serine-type endopeptidase inhibitor activity;GO:0005488//binding;GO:0005515//protein binding;GO:0019838//growth factor binding;GO:0019955//cytokine binding;GO:0030234//enzyme regulator activity;GO:0030414//peptidase inhibitor activity;GO:0034073//tetrahymanol cyclase activ…	GO:0000768//syncytium formation by plasma membrane fusion;GO:0001932//regulation of protein phosphorylation;GO:0001933//negative regulation of protein phosphorylation;GO:0001942//hair follicle development;GO:0002376//immune system process;GO:0002520//immune system development;GO:0002521//leukocyte differentiation;GO:0002573//myeloid leukocyte differentiation;GO:0002576//platelet degranulation;GO:…
LG02	15819401	15819600	*	2.05e-10	6.55e-08	-27.9307	g1938	Genebody	RpI135	XP_016914341.1 DNA-directed RNA polymerase I subunit RPA2 isoform X1 [Apis cerana]	-	-	-	-	GO:0000345//cytosolic DNA-directed RNA polymerase complex;GO:0000428//DNA-directed RNA polymerase complex;GO:0005575//cellular_component;GO:0005622//intracellular;GO:0005623//cell;GO:0005634//nucleus;GO:0005654//nucleoplasm;GO:0005730//nucleolus;GO:0005736//DNA-directed RNA polymerase I complex;GO:0005737//cytoplasm;GO:0005829//cytosol;GO:0030127//COPII vesicle coat;GO:0030880//RNA polymerase com…	GO:0001882//nucleoside binding;GO:0003674//molecular_function;GO:0003676//nucleic acid binding;GO:0003677//DNA binding;GO:0003824//catalytic activity;GO:0003899//DNA-directed RNA polymerase activity;GO:0005488//binding;GO:0008270//zinc ion binding;GO:0016740//transferase activity;GO:0016772//transferase activity, transferring phosphorus-containing groups;GO:0016779//nucleotidyltransferase activit…	GO:0000003//reproduction;GO:0006139//nucleobase-containing compound metabolic process;GO:0006351//transcription, DNA-templated;GO:0006352//DNA-templated transcription, initiation;GO:0006353//DNA-templated transcription, termination;GO:0006360//transcription from RNA polymerase I promoter;GO:0006361//transcription initiation from RNA polymerase I promoter;GO:0006363//termination of RNA polymerase …
LG02	15819501	15819700	*	2.05e-10	6.55e-08	-27.9307	g1938	Genebody	RpI135	XP_016914341.1 DNA-directed RNA polymerase I subunit RPA2 isoform X1 [Apis cerana]	-	-	-	-	GO:0000345//cytosolic DNA-directed RNA polymerase complex;GO:0000428//DNA-directed RNA polymerase complex;GO:0005575//cellular_component;GO:0005622//intracellular;GO:0005623//cell;GO:0005634//nucleus;GO:0005654//nucleoplasm;GO:0005730//nucleolus;GO:0005736//DNA-directed RNA polymerase I complex;GO:0005737//cytoplasm;GO:0005829//cytosol;GO:0030127//COPII vesicle coat;GO:0030880//RNA polymerase com…	GO:0001882//nucleoside binding;GO:0003674//molecular_function;GO:0003676//nucleic acid binding;GO:0003677//DNA binding;GO:0003824//catalytic activity;GO:0003899//DNA-directed RNA polymerase activity;GO:0005488//binding;GO:0008270//zinc ion binding;GO:0016740//transferase activity;GO:0016772//transferase activity, transferring phosphorus-containing groups;GO:0016779//nucleotidyltransferase activit…	GO:0000003//reproduction;GO:0006139//nucleobase-containing compound metabolic process;GO:0006351//transcription, DNA-templated;GO:0006352//DNA-templated transcription, initiation;GO:0006353//DNA-templated transcription, termination;GO:0006360//transcription from RNA polymerase I promoter;GO:0006361//transcription initiation from RNA polymerase I promoter;GO:0006363//termination of RNA polymerase …
LG02	15980701	15980900	*	4.4e-31	2.12e-27	25.6432	g1948	Genebody	kto	PBC28522.1 Mediator of RNA polymerase II transcription subunit [Apis cerana cerana]	Organismal Systems	Endocrine system	ko04919//Thyroid hormone signaling pathway	K15162	GO:0000428//DNA-directed RNA polymerase complex;GO:0005575//cellular_component;GO:0005622//intracellular;GO:0005623//cell;GO:0005634//nucleus;GO:0005654//nucleoplasm;GO:0005667//transcription factor complex;GO:0005694//chromosome;GO:0005700//polytene chromosome;GO:0016591//DNA-directed RNA polymerase II, holoenzyme;GO:0016592//mediator complex;GO:0030880//RNA polymerase complex;GO:0031974//membra…	GO:0003674//molecular_function;GO:0003700//transcription factor activity, sequence-specific DNA binding;GO:0003712//transcription cofactor activity;GO:0005488//binding;GO:0005515//protein binding;GO:0008013//beta-catenin binding	GO:0001501//skeletal system development;GO:0001654//eye development;GO:0001655//urogenital system development;GO:0001822//kidney development;GO:0002009//morphogenesis of an epithelium;GO:0002165//instar larval or pupal development;GO:0002682//regulation of immune system process;GO:0002761//regulation of myeloid leukocyte differentiation;GO:0003002//regionalization;GO:0006139//nucleobase-containin…
LG02	15980801	15981000	*	4.44e-47	1.13e-42	34.3083	g1948	Genebody	kto	PBC28522.1 Mediator of RNA polymerase II transcription subunit [Apis cerana cerana]	Organismal Systems	Endocrine system	ko04919//Thyroid hormone signaling pathway	K15162	GO:0000428//DNA-directed RNA polymerase complex;GO:0005575//cellular_component;GO:0005622//intracellular;GO:0005623//cell;GO:0005634//nucleus;GO:0005654//nucleoplasm;GO:0005667//transcription factor complex;GO:0005694//chromosome;GO:0005700//polytene chromosome;GO:0016591//DNA-directed RNA polymerase II, holoenzyme;GO:0016592//mediator complex;GO:0030880//RNA polymerase complex;GO:0031974//membra…	GO:0003674//molecular_function;GO:0003700//transcription factor activity, sequence-specific DNA binding;GO:0003712//transcription cofactor activity;GO:0005488//binding;GO:0005515//protein binding;GO:0008013//beta-catenin binding	GO:0001501//skeletal system development;GO:0001654//eye development;GO:0001655//urogenital system development;GO:0001822//kidney development;GO:0002009//morphogenesis of an epithelium;GO:0002165//instar larval or pupal development;GO:0002682//regulation of immune system process;GO:0002761//regulation of myeloid leukocyte differentiation;GO:0003002//regionalization;GO:0006139//nucleobase-containin…
LG02	16091601	16091800	*	1.18e-31	6.15e-28	47.7818	g1964	Genebody	Rnf123	PBC28540.1 E3 ubiquitin-protein ligase [Apis cerana cerana]	-	-	-	-	GO:0000109//nucleotide-excision repair complex;GO:0000151//ubiquitin ligase complex;GO:0005575//cellular_component;GO:0005622//intracellular;GO:0005623//cell;GO:0005634//nucleus;GO:0005635//nuclear envelope;GO:0005737//cytoplasm;GO:0005829//cytosol;GO:0012505//endomembrane system;GO:0016020//membrane;GO:0016021//integral component of membrane;GO:0031090//organelle membrane;GO:0031224//intrinsic c…	GO:0003674//molecular_function;GO:0003824//catalytic activity;GO:0004842//ubiquitin-protein transferase activity;GO:0005488//binding;GO:0005515//protein binding;GO:0008270//zinc ion binding;GO:0016740//transferase activity;GO:0019787//ubiquitin-like protein transferase activity;GO:0034450//ubiquitin-ubiquitin ligase activity;GO:0043167//ion binding;GO:0043169//cation binding;GO:0046872//metal ion…	GO:0006289//nucleotide-excision repair;GO:0006464//cellular protein modification process;GO:0006508//proteolysis;GO:0006511//ubiquitin-dependent protein catabolic process;GO:0006807//nitrogen compound metabolic process;GO:0008150//biological_process;GO:0008152//metabolic process;GO:0009056//catabolic process;GO:0009057//macromolecule catabolic process;GO:0009605//response to external stimulus;GO:…
LG02	16103701	16103900	*	1.25e-31	6.45e-28	31.441	g1965	Genebody	SRGAP1	PBC28541.1 SLIT-ROBO Rho GTPase-activating protein [Apis cerana cerana]	Organismal Systems	Development	ko04360//Axon guidance	K07526	GO:0005575//cellular_component;GO:0005622//intracellular;GO:0005623//cell;GO:0005737//cytoplasm;GO:0005912//adherens junction;GO:0005938//cell cortex;GO:0030054//cell junction;GO:0044424//intracellular part;GO:0044444//cytoplasmic part;GO:0044464//cell part;GO:0070161//anchoring junction;GO:0071944//cell periphery;GO:0099568//cytoplasmic region	GO:0003674//molecular_function;GO:0004553//hydrolase activity, hydrolyzing O-glycosyl compounds;GO:0005096//GTPase activator activity;GO:0005488//binding;GO:0005515//protein binding;GO:0008047//enzyme activator activity;GO:0017016//Ras GTPase binding;GO:0017048//Rho GTPase binding;GO:0019899//enzyme binding;GO:0030234//enzyme regulator activity;GO:0030695//GTPase regulator activity;GO:0031267//sm…	GO:0005975//carbohydrate metabolic process;GO:0007154//cell communication;GO:0007165//signal transduction;GO:0008150//biological_process;GO:0009987//cellular process;GO:0010470//regulation of gastrulation;GO:0022407//regulation of cell-cell adhesion;GO:0022409//positive regulation of cell-cell adhesion;GO:0022603//regulation of anatomical structure morphogenesis;GO:0023052//signaling;GO:0030100//…
LG02	16209601	16209800	*	1.35e-21	2.19e-18	-32.1261	g1968	Genebody	Claspin	PBC28544.1 Insulinoma-associated protein [Apis cerana cerana]	-	-	-	-	-	-	-
LG02	16209701	16209900	*	2.83e-14	1.71e-11	-25.7849	g1968	Genebody	Claspin	PBC28544.1 Insulinoma-associated protein [Apis cerana cerana]	-	-	-	-	-	-	-
LG02	16268701	16268900	*	9.62e-21	1.4e-17	-27.0388	g1971	Genebody	XPO6	PBC28548.1 Exportin-6 [Apis cerana cerana]	-	-	-	-	GO:0005575//cellular_component;GO:0005622//intracellular;GO:0005623//cell;GO:0005634//nucleus;GO:0005730//nucleolus;GO:0005737//cytoplasm;GO:0005829//cytosol;GO:0005886//plasma membrane;GO:0016020//membrane;GO:0031974//membrane-enclosed lumen;GO:0031981//nuclear lumen;GO:0043226//organelle;GO:0043227//membrane-bounded organelle;GO:0043228//non-membrane-bounded organelle;GO:0043229//intracellular …	GO:0003674//molecular_function;GO:0005215//transporter activity;GO:0005488//binding;GO:0005515//protein binding;GO:0008536//Ran GTPase binding;GO:0008565//protein transporter activity;GO:0017016//Ras GTPase binding;GO:0019899//enzyme binding;GO:0031267//small GTPase binding;GO:0051020//GTPase binding	GO:0003008//system process;GO:0006611//protein export from nucleus;GO:0006810//transport;GO:0006886//intracellular protein transport;GO:0006913//nucleocytoplasmic transport;GO:0007275//multicellular organism development;GO:0007399//nervous system development;GO:0007417//central nervous system development;GO:0007420//brain development;GO:0007610//behavior;GO:0007611//learning or memory;GO:0007613/…
LG02	16268801	16269000	*	1.16e-27	3.91e-24	-31.2601	g1971	Genebody	XPO6	PBC28548.1 Exportin-6 [Apis cerana cerana]	-	-	-	-	GO:0005575//cellular_component;GO:0005622//intracellular;GO:0005623//cell;GO:0005634//nucleus;GO:0005730//nucleolus;GO:0005737//cytoplasm;GO:0005829//cytosol;GO:0005886//plasma membrane;GO:0016020//membrane;GO:0031974//membrane-enclosed lumen;GO:0031981//nuclear lumen;GO:0043226//organelle;GO:0043227//membrane-bounded organelle;GO:0043228//non-membrane-bounded organelle;GO:0043229//intracellular …	GO:0003674//molecular_function;GO:0005215//transporter activity;GO:0005488//binding;GO:0005515//protein binding;GO:0008536//Ran GTPase binding;GO:0008565//protein transporter activity;GO:0017016//Ras GTPase binding;GO:0019899//enzyme binding;GO:0031267//small GTPase binding;GO:0051020//GTPase binding	GO:0003008//system process;GO:0006611//protein export from nucleus;GO:0006810//transport;GO:0006886//intracellular protein transport;GO:0006913//nucleocytoplasmic transport;GO:0007275//multicellular organism development;GO:0007399//nervous system development;GO:0007417//central nervous system development;GO:0007420//brain development;GO:0007610//behavior;GO:0007611//learning or memory;GO:0007613/…
LG02	16862601	16862800	*	3.04e-11	1.13e-08	27.5904	g1986	Genebody	--	XP_016911564.1 uncharacterized protein LOC107997467 [Apis cerana]	-	-	-	-	-	-	-
LG03	15101	15300	*	4.35e-20	5.79e-17	25.6881	g1991	Genebody	RasGAP1	XP_016915049.1 ras GTPase-activating protein 3 isoform X2 [Apis cerana]	Environmental Information Processing;Environmental Information Processing	Signal transduction;Signal transduction	ko04013//MAPK signaling pathway - fly;ko04014//Ras signaling pathway	K12380;K12380	GO:0005575//cellular_component;GO:0005622//intracellular;GO:0005623//cell;GO:0005737//cytoplasm;GO:0005886//plasma membrane;GO:0009898//cytoplasmic side of plasma membrane;GO:0016020//membrane;GO:0031224//intrinsic component of membrane;GO:0031226//intrinsic component of plasma membrane;GO:0031235//intrinsic component of the cytoplasmic side of the plasma membrane;GO:0044424//intracellular part;G…	GO:0003674//molecular_function;GO:0005096//GTPase activator activity;GO:0008047//enzyme activator activity;GO:0030234//enzyme regulator activity;GO:0030695//GTPase regulator activity;GO:0060589//nucleoside-triphosphatase regulator activity;GO:0098772//molecular function regulator	GO:0000578//embryonic axis specification;GO:0002009//morphogenesis of an epithelium;GO:0002165//instar larval or pupal development;GO:0003002//regionalization;GO:0003008//system process;GO:0006355//regulation of transcription, DNA-templated;GO:0006357//regulation of transcription from RNA polymerase II promoter;GO:0007154//cell communication;GO:0007165//signal transduction;GO:0007166//cell surfac…
LG03	415201	415400	*	1.23e-12	5.72e-10	-28.1519	g2004	Genebody	GPHN	PBC28115.1 Molybdenum cofactor synthesis protein cinnamon [Apis cerana cerana]	Metabolism;Organismal Systems;Metabolism	Global and overview maps;Nervous system;Metabolism of cofactors and vitamins	ko01100//Metabolic pathways;ko04727//GABAergic synapse;ko00790//Folate biosynthesis	K15376;K15376;K15376	GO:0005575//cellular_component;GO:0005622//intracellular;GO:0005623//cell;GO:0005737//cytoplasm;GO:0005856//cytoskeleton;GO:0005886//plasma membrane;GO:0009898//cytoplasmic side of plasma membrane;GO:0016020//membrane;GO:0019897//extrinsic component of plasma membrane;GO:0019898//extrinsic component of membrane;GO:0030054//cell junction;GO:0030425//dendrite;GO:0031234//extrinsic component of cyto…	GO:0000166//nucleotide binding;GO:0003674//molecular_function;GO:0003824//catalytic activity;GO:0005102//receptor binding;GO:0005198//structural molecule activity;GO:0005488//binding;GO:0005515//protein binding;GO:0005524//ATP binding;GO:0008092//cytoskeletal protein binding;GO:0008144//drug binding;GO:0008940//nitrate reductase activity;GO:0015631//tubulin binding;GO:0016491//oxidoreductase acti…	GO:0001941//postsynaptic membrane organization;GO:0006139//nucleobase-containing compound metabolic process;GO:0006163//purine nucleotide metabolic process;GO:0006464//cellular protein modification process;GO:0006605//protein targeting;GO:0006725//cellular aromatic compound metabolic process;GO:0006732//coenzyme metabolic process;GO:0006753//nucleoside phosphate metabolic process;GO:0006777//Mo-m…
LG03	430101	430300	*	5.38e-79	1.89e-73	60.9135	g2005	Genebody	Cpt1a	XP_026294634.1 carnitine O-palmitoyltransferase 1, liver isoform isoform X3 [Apis mellifera]	Organismal Systems;Environmental Information Processing;Organismal Systems;Human Diseases;Metabolism;Organismal Systems;Metabolism;Organismal Systems	Environmental adaptation;Signal transduction;Endocrine system;Endocrine and metabolic diseases;Global and overview maps;Endocrine system;Lipid metabolism;Endocrine system	ko04714//Thermogenesis;ko04152//AMPK signaling pathway;ko04922//Glucagon signaling pathway;ko04931//Insulin resistance;ko01212//Fatty acid metabolism;ko03320//PPAR signaling pathway;ko00071//Fatty acid degradation;ko04920//Adipocytokine signaling pathway	K08765;K08765;K08765;K08765;K08765;K08765;K08765;K08765	GO:0005575//cellular_component;GO:0016020//membrane;GO:0016021//integral component of membrane;GO:0031224//intrinsic component of membrane;GO:0044425//membrane part	GO:0003674//molecular_function;GO:0003824//catalytic activity;GO:0016740//transferase activity;GO:0016746//transferase activity, transferring acyl groups	GO:0006950//response to stress;GO:0006979//response to oxidative stress;GO:0008150//biological_process;GO:0009605//response to external stimulus;GO:0009636//response to toxic substance;GO:0009991//response to extracellular stimulus;GO:0010033//response to organic substance;GO:0010035//response to inorganic substance;GO:0010038//response to metal ion;GO:0031667//response to nutrient levels;GO:0042…
LG03	430201	430400	*	2.82e-58	1.88e-53	45.0553	g2005	Genebody	Cpt1a	XP_026294634.1 carnitine O-palmitoyltransferase 1, liver isoform isoform X3 [Apis mellifera]	Organismal Systems;Environmental Information Processing;Organismal Systems;Human Diseases;Metabolism;Organismal Systems;Metabolism;Organismal Systems	Environmental adaptation;Signal transduction;Endocrine system;Endocrine and metabolic diseases;Global and overview maps;Endocrine system;Lipid metabolism;Endocrine system	ko04714//Thermogenesis;ko04152//AMPK signaling pathway;ko04922//Glucagon signaling pathway;ko04931//Insulin resistance;ko01212//Fatty acid metabolism;ko03320//PPAR signaling pathway;ko00071//Fatty acid degradation;ko04920//Adipocytokine signaling pathway	K08765;K08765;K08765;K08765;K08765;K08765;K08765;K08765	GO:0005575//cellular_component;GO:0016020//membrane;GO:0016021//integral component of membrane;GO:0031224//intrinsic component of membrane;GO:0044425//membrane part	GO:0003674//molecular_function;GO:0003824//catalytic activity;GO:0016740//transferase activity;GO:0016746//transferase activity, transferring acyl groups	GO:0006950//response to stress;GO:0006979//response to oxidative stress;GO:0008150//biological_process;GO:0009605//response to external stimulus;GO:0009636//response to toxic substance;GO:0009991//response to extracellular stimulus;GO:0010033//response to organic substance;GO:0010035//response to inorganic substance;GO:0010038//response to metal ion;GO:0031667//response to nutrient levels;GO:0042…
LG03	797201	797400	*	5.85e-10	1.72e-07	27.9577	g2013	Genebody	Nf1	PBC28105.1 Neurofibromin [Apis cerana cerana]	-	-	-	-	GO:0005575//cellular_component;GO:0005622//intracellular;GO:0005623//cell;GO:0005634//nucleus;GO:0005730//nucleolus;GO:0005737//cytoplasm;GO:0005829//cytosol;GO:0005886//plasma membrane;GO:0009898//cytoplasmic side of plasma membrane;GO:0014069//postsynaptic density;GO:0016020//membrane;GO:0030424//axon;GO:0030425//dendrite;GO:0031224//intrinsic component of membrane;GO:0031226//intrinsic compone…	GO:0003674//molecular_function;GO:0005096//GTPase activator activity;GO:0005488//binding;GO:0005515//protein binding;GO:0005543//phospholipid binding;GO:0008017//microtubule binding;GO:0008047//enzyme activator activity;GO:0008092//cytoskeletal protein binding;GO:0008289//lipid binding;GO:0008429//phosphatidylethanolamine binding;GO:0015631//tubulin binding;GO:0030234//enzyme regulator activity;G…	GO:0000165//MAPK cascade;GO:0001503//ossification;GO:0001505//regulation of neurotransmitter levels;GO:0001568//blood vessel development;GO:0001649//osteoblast differentiation;GO:0001654//eye development;GO:0001655//urogenital system development;GO:0001656//metanephros development;GO:0001666//response to hypoxia;GO:0001822//kidney development;GO:0001889//liver development;GO:0001932//regulation o…
LG03	798601	798800	*	3.91e-21	6.03e-18	-25.9259	g2013	Genebody	Nf1	PBC28105.1 Neurofibromin [Apis cerana cerana]	-	-	-	-	GO:0005575//cellular_component;GO:0005622//intracellular;GO:0005623//cell;GO:0005634//nucleus;GO:0005730//nucleolus;GO:0005737//cytoplasm;GO:0005829//cytosol;GO:0005886//plasma membrane;GO:0009898//cytoplasmic side of plasma membrane;GO:0014069//postsynaptic density;GO:0016020//membrane;GO:0030424//axon;GO:0030425//dendrite;GO:0031224//intrinsic component of membrane;GO:0031226//intrinsic compone…	GO:0003674//molecular_function;GO:0005096//GTPase activator activity;GO:0005488//binding;GO:0005515//protein binding;GO:0005543//phospholipid binding;GO:0008017//microtubule binding;GO:0008047//enzyme activator activity;GO:0008092//cytoskeletal protein binding;GO:0008289//lipid binding;GO:0008429//phosphatidylethanolamine binding;GO:0015631//tubulin binding;GO:0030234//enzyme regulator activity;G…	GO:0000165//MAPK cascade;GO:0001503//ossification;GO:0001505//regulation of neurotransmitter levels;GO:0001568//blood vessel development;GO:0001649//osteoblast differentiation;GO:0001654//eye development;GO:0001655//urogenital system development;GO:0001656//metanephros development;GO:0001666//response to hypoxia;GO:0001822//kidney development;GO:0001889//liver development;GO:0001932//regulation o…
LG03	799201	799400	*	1.79e-18	1.93e-15	-30.7916	g2013	Genebody	Nf1	PBC28105.1 Neurofibromin [Apis cerana cerana]	-	-	-	-	GO:0005575//cellular_component;GO:0005622//intracellular;GO:0005623//cell;GO:0005634//nucleus;GO:0005730//nucleolus;GO:0005737//cytoplasm;GO:0005829//cytosol;GO:0005886//plasma membrane;GO:0009898//cytoplasmic side of plasma membrane;GO:0014069//postsynaptic density;GO:0016020//membrane;GO:0030424//axon;GO:0030425//dendrite;GO:0031224//intrinsic component of membrane;GO:0031226//intrinsic compone…	GO:0003674//molecular_function;GO:0005096//GTPase activator activity;GO:0005488//binding;GO:0005515//protein binding;GO:0005543//phospholipid binding;GO:0008017//microtubule binding;GO:0008047//enzyme activator activity;GO:0008092//cytoskeletal protein binding;GO:0008289//lipid binding;GO:0008429//phosphatidylethanolamine binding;GO:0015631//tubulin binding;GO:0030234//enzyme regulator activity;G…	GO:0000165//MAPK cascade;GO:0001503//ossification;GO:0001505//regulation of neurotransmitter levels;GO:0001568//blood vessel development;GO:0001649//osteoblast differentiation;GO:0001654//eye development;GO:0001655//urogenital system development;GO:0001656//metanephros development;GO:0001666//response to hypoxia;GO:0001822//kidney development;GO:0001889//liver development;GO:0001932//regulation o…
LG03	803501	803700	*	7.9e-23	1.46e-19	-34.8055	g2013	Genebody	Nf1	PBC28105.1 Neurofibromin [Apis cerana cerana]	-	-	-	-	GO:0005575//cellular_component;GO:0005622//intracellular;GO:0005623//cell;GO:0005634//nucleus;GO:0005730//nucleolus;GO:0005737//cytoplasm;GO:0005829//cytosol;GO:0005886//plasma membrane;GO:0009898//cytoplasmic side of plasma membrane;GO:0014069//postsynaptic density;GO:0016020//membrane;GO:0030424//axon;GO:0030425//dendrite;GO:0031224//intrinsic component of membrane;GO:0031226//intrinsic compone…	GO:0003674//molecular_function;GO:0005096//GTPase activator activity;GO:0005488//binding;GO:0005515//protein binding;GO:0005543//phospholipid binding;GO:0008017//microtubule binding;GO:0008047//enzyme activator activity;GO:0008092//cytoskeletal protein binding;GO:0008289//lipid binding;GO:0008429//phosphatidylethanolamine binding;GO:0015631//tubulin binding;GO:0030234//enzyme regulator activity;G…	GO:0000165//MAPK cascade;GO:0001503//ossification;GO:0001505//regulation of neurotransmitter levels;GO:0001568//blood vessel development;GO:0001649//osteoblast differentiation;GO:0001654//eye development;GO:0001655//urogenital system development;GO:0001656//metanephros development;GO:0001666//response to hypoxia;GO:0001822//kidney development;GO:0001889//liver development;GO:0001932//regulation o…
LG03	803601	803800	*	3.62e-10	1.11e-07	-27.6918	g2013	Genebody	Nf1	PBC28105.1 Neurofibromin [Apis cerana cerana]	-	-	-	-	GO:0005575//cellular_component;GO:0005622//intracellular;GO:0005623//cell;GO:0005634//nucleus;GO:0005730//nucleolus;GO:0005737//cytoplasm;GO:0005829//cytosol;GO:0005886//plasma membrane;GO:0009898//cytoplasmic side of plasma membrane;GO:0014069//postsynaptic density;GO:0016020//membrane;GO:0030424//axon;GO:0030425//dendrite;GO:0031224//intrinsic component of membrane;GO:0031226//intrinsic compone…	GO:0003674//molecular_function;GO:0005096//GTPase activator activity;GO:0005488//binding;GO:0005515//protein binding;GO:0005543//phospholipid binding;GO:0008017//microtubule binding;GO:0008047//enzyme activator activity;GO:0008092//cytoskeletal protein binding;GO:0008289//lipid binding;GO:0008429//phosphatidylethanolamine binding;GO:0015631//tubulin binding;GO:0030234//enzyme regulator activity;G…	GO:0000165//MAPK cascade;GO:0001503//ossification;GO:0001505//regulation of neurotransmitter levels;GO:0001568//blood vessel development;GO:0001649//osteoblast differentiation;GO:0001654//eye development;GO:0001655//urogenital system development;GO:0001656//metanephros development;GO:0001666//response to hypoxia;GO:0001822//kidney development;GO:0001889//liver development;GO:0001932//regulation o…
LG03	804101	804300	*	6.74e-30	2.88e-26	-32.07	g2013	Genebody	Nf1	PBC28105.1 Neurofibromin [Apis cerana cerana]	-	-	-	-	GO:0005575//cellular_component;GO:0005622//intracellular;GO:0005623//cell;GO:0005634//nucleus;GO:0005730//nucleolus;GO:0005737//cytoplasm;GO:0005829//cytosol;GO:0005886//plasma membrane;GO:0009898//cytoplasmic side of plasma membrane;GO:0014069//postsynaptic density;GO:0016020//membrane;GO:0030424//axon;GO:0030425//dendrite;GO:0031224//intrinsic component of membrane;GO:0031226//intrinsic compone…	GO:0003674//molecular_function;GO:0005096//GTPase activator activity;GO:0005488//binding;GO:0005515//protein binding;GO:0005543//phospholipid binding;GO:0008017//microtubule binding;GO:0008047//enzyme activator activity;GO:0008092//cytoskeletal protein binding;GO:0008289//lipid binding;GO:0008429//phosphatidylethanolamine binding;GO:0015631//tubulin binding;GO:0030234//enzyme regulator activity;G…	GO:0000165//MAPK cascade;GO:0001503//ossification;GO:0001505//regulation of neurotransmitter levels;GO:0001568//blood vessel development;GO:0001649//osteoblast differentiation;GO:0001654//eye development;GO:0001655//urogenital system development;GO:0001656//metanephros development;GO:0001666//response to hypoxia;GO:0001822//kidney development;GO:0001889//liver development;GO:0001932//regulation o…
LG03	804201	804400	*	3.59e-30	1.6e-26	-25.6081	g2013	Genebody	Nf1	PBC28105.1 Neurofibromin [Apis cerana cerana]	-	-	-	-	GO:0005575//cellular_component;GO:0005622//intracellular;GO:0005623//cell;GO:0005634//nucleus;GO:0005730//nucleolus;GO:0005737//cytoplasm;GO:0005829//cytosol;GO:0005886//plasma membrane;GO:0009898//cytoplasmic side of plasma membrane;GO:0014069//postsynaptic density;GO:0016020//membrane;GO:0030424//axon;GO:0030425//dendrite;GO:0031224//intrinsic component of membrane;GO:0031226//intrinsic compone…	GO:0003674//molecular_function;GO:0005096//GTPase activator activity;GO:0005488//binding;GO:0005515//protein binding;GO:0005543//phospholipid binding;GO:0008017//microtubule binding;GO:0008047//enzyme activator activity;GO:0008092//cytoskeletal protein binding;GO:0008289//lipid binding;GO:0008429//phosphatidylethanolamine binding;GO:0015631//tubulin binding;GO:0030234//enzyme regulator activity;G…	GO:0000165//MAPK cascade;GO:0001503//ossification;GO:0001505//regulation of neurotransmitter levels;GO:0001568//blood vessel development;GO:0001649//osteoblast differentiation;GO:0001654//eye development;GO:0001655//urogenital system development;GO:0001656//metanephros development;GO:0001666//response to hypoxia;GO:0001822//kidney development;GO:0001889//liver development;GO:0001932//regulation o…
LG03	806201	806400	*	1.59e-09	4.3e-07	-26.6549	g2013	Genebody	Nf1	PBC28105.1 Neurofibromin [Apis cerana cerana]	-	-	-	-	GO:0005575//cellular_component;GO:0005622//intracellular;GO:0005623//cell;GO:0005634//nucleus;GO:0005730//nucleolus;GO:0005737//cytoplasm;GO:0005829//cytosol;GO:0005886//plasma membrane;GO:0009898//cytoplasmic side of plasma membrane;GO:0014069//postsynaptic density;GO:0016020//membrane;GO:0030424//axon;GO:0030425//dendrite;GO:0031224//intrinsic component of membrane;GO:0031226//intrinsic compone…	GO:0003674//molecular_function;GO:0005096//GTPase activator activity;GO:0005488//binding;GO:0005515//protein binding;GO:0005543//phospholipid binding;GO:0008017//microtubule binding;GO:0008047//enzyme activator activity;GO:0008092//cytoskeletal protein binding;GO:0008289//lipid binding;GO:0008429//phosphatidylethanolamine binding;GO:0015631//tubulin binding;GO:0030234//enzyme regulator activity;G…	GO:0000165//MAPK cascade;GO:0001503//ossification;GO:0001505//regulation of neurotransmitter levels;GO:0001568//blood vessel development;GO:0001649//osteoblast differentiation;GO:0001654//eye development;GO:0001655//urogenital system development;GO:0001656//metanephros development;GO:0001666//response to hypoxia;GO:0001822//kidney development;GO:0001889//liver development;GO:0001932//regulation o…
LG03	1377701	1377900	*	6.73e-11	2.36e-08	-33.7555	g2025	Genebody	GBE1	PBC25379.1 1,4-alpha-glucan-branching enzyme [Apis cerana cerana]	Metabolism;Metabolism	Global and overview maps;Carbohydrate metabolism	ko01100//Metabolic pathways;ko00500//Starch and sucrose metabolism	K00700;K00700	GO:0005575//cellular_component;GO:0005622//intracellular;GO:0005623//cell;GO:0005737//cytoplasm;GO:0005829//cytosol;GO:0044424//intracellular part;GO:0044444//cytoplasmic part;GO:0044464//cell part	GO:0003674//molecular_function;GO:0003824//catalytic activity;GO:0003844//1,4-alpha-glucan branching enzyme activity;GO:0004133//glycogen debranching enzyme activity;GO:0004553//hydrolase activity, hydrolyzing O-glycosyl compounds;GO:0004556//alpha-amylase activity;GO:0005488//binding;GO:0008788//alpha,alpha-phosphotrehalase activity;GO:0016160//amylase activity;GO:0016740//transferase activity;G…	GO:0000271//polysaccharide biosynthetic process;GO:0005975//carbohydrate metabolic process;GO:0005976//polysaccharide metabolic process;GO:0005977//glycogen metabolic process;GO:0005978//glycogen biosynthetic process;GO:0005980//glycogen catabolic process;GO:0005983//starch catabolic process;GO:0005991//trehalose metabolic process;GO:0005992//trehalose biosynthetic process;GO:0006073//cellular gl…
LG03	1429901	1430100	*	9.66e-18	9.41e-15	-27.9813	g2028	Genebody	l(2)tid	PBC25376.1 Protein tumorous imaginal discs [Apis cerana cerana]	Human Diseases	Cancers	ko05203//Viral carcinogenesis	K09504	GO:0005575//cellular_component;GO:0005622//intracellular;GO:0005623//cell;GO:0005634//nucleus;GO:0005737//cytoplasm;GO:0005739//mitochondrion;GO:0005740//mitochondrial envelope;GO:0005741//mitochondrial outer membrane;GO:0005759//mitochondrial matrix;GO:0005829//cytosol;GO:0005856//cytoskeleton;GO:0005884//actin filament;GO:0005886//plasma membrane;GO:0009295//nucleoid;GO:0015629//actin cytoskele…	GO:0000166//nucleotide binding;GO:0003674//molecular_function;GO:0005102//receptor binding;GO:0005113//patched binding;GO:0005126//cytokine receptor binding;GO:0005133//interferon-gamma receptor binding;GO:0005488//binding;GO:0005515//protein binding;GO:0005524//ATP binding;GO:0008134//transcription factor binding;GO:0008144//drug binding;GO:0017076//purine nucleotide binding;GO:0019899//enzyme b…	GO:0000002//mitochondrial genome maintenance;GO:0000122//negative regulation of transcription from RNA polymerase II promoter;GO:0001775//cell activation;GO:0001776//leukocyte homeostasis;GO:0001932//regulation of protein phosphorylation;GO:0001933//negative regulation of protein phosphorylation;GO:0001941//postsynaptic membrane organization;GO:0001959//regulation of cytokine-mediated signaling p…
LG03	1430001	1430200	*	1.63e-12	7.43e-10	-26.6787	g2028	Genebody	l(2)tid	PBC25376.1 Protein tumorous imaginal discs [Apis cerana cerana]	Human Diseases	Cancers	ko05203//Viral carcinogenesis	K09504	GO:0005575//cellular_component;GO:0005622//intracellular;GO:0005623//cell;GO:0005634//nucleus;GO:0005737//cytoplasm;GO:0005739//mitochondrion;GO:0005740//mitochondrial envelope;GO:0005741//mitochondrial outer membrane;GO:0005759//mitochondrial matrix;GO:0005829//cytosol;GO:0005856//cytoskeleton;GO:0005884//actin filament;GO:0005886//plasma membrane;GO:0009295//nucleoid;GO:0015629//actin cytoskele…	GO:0000166//nucleotide binding;GO:0003674//molecular_function;GO:0005102//receptor binding;GO:0005113//patched binding;GO:0005126//cytokine receptor binding;GO:0005133//interferon-gamma receptor binding;GO:0005488//binding;GO:0005515//protein binding;GO:0005524//ATP binding;GO:0008134//transcription factor binding;GO:0008144//drug binding;GO:0017076//purine nucleotide binding;GO:0019899//enzyme b…	GO:0000002//mitochondrial genome maintenance;GO:0000122//negative regulation of transcription from RNA polymerase II promoter;GO:0001775//cell activation;GO:0001776//leukocyte homeostasis;GO:0001932//regulation of protein phosphorylation;GO:0001933//negative regulation of protein phosphorylation;GO:0001941//postsynaptic membrane organization;GO:0001959//regulation of cytokine-mediated signaling p…
LG03	1430301	1430500	*	4.12e-13	2.07e-10	28.2046	g2028	Genebody	l(2)tid	PBC25376.1 Protein tumorous imaginal discs [Apis cerana cerana]	Human Diseases	Cancers	ko05203//Viral carcinogenesis	K09504	GO:0005575//cellular_component;GO:0005622//intracellular;GO:0005623//cell;GO:0005634//nucleus;GO:0005737//cytoplasm;GO:0005739//mitochondrion;GO:0005740//mitochondrial envelope;GO:0005741//mitochondrial outer membrane;GO:0005759//mitochondrial matrix;GO:0005829//cytosol;GO:0005856//cytoskeleton;GO:0005884//actin filament;GO:0005886//plasma membrane;GO:0009295//nucleoid;GO:0015629//actin cytoskele…	GO:0000166//nucleotide binding;GO:0003674//molecular_function;GO:0005102//receptor binding;GO:0005113//patched binding;GO:0005126//cytokine receptor binding;GO:0005133//interferon-gamma receptor binding;GO:0005488//binding;GO:0005515//protein binding;GO:0005524//ATP binding;GO:0008134//transcription factor binding;GO:0008144//drug binding;GO:0017076//purine nucleotide binding;GO:0019899//enzyme b…	GO:0000002//mitochondrial genome maintenance;GO:0000122//negative regulation of transcription from RNA polymerase II promoter;GO:0001775//cell activation;GO:0001776//leukocyte homeostasis;GO:0001932//regulation of protein phosphorylation;GO:0001933//negative regulation of protein phosphorylation;GO:0001941//postsynaptic membrane organization;GO:0001959//regulation of cytokine-mediated signaling p…
LG03	1818101	1818300	*	3.3e-34	2.3e-30	40.9098	g2050	Genebody	CLASRP	PBC25536.1 Splicing factor, arginine/serine-rich [Apis cerana cerana]	-	-	-	-	GO:0005575//cellular_component;GO:0005622//intracellular;GO:0005623//cell;GO:0005634//nucleus;GO:0005654//nucleoplasm;GO:0031974//membrane-enclosed lumen;GO:0031981//nuclear lumen;GO:0043226//organelle;GO:0043227//membrane-bounded organelle;GO:0043229//intracellular organelle;GO:0043231//intracellular membrane-bounded organelle;GO:0043233//organelle lumen;GO:0044422//organelle part;GO:0044424//in…	-	GO:0006139//nucleobase-containing compound metabolic process;GO:0006396//RNA processing;GO:0006397//mRNA processing;GO:0006725//cellular aromatic compound metabolic process;GO:0006807//nitrogen compound metabolic process;GO:0008150//biological_process;GO:0008152//metabolic process;GO:0008380//RNA splicing;GO:0009987//cellular process;GO:0010467//gene expression;GO:0016070//RNA metabolic process;G…
LG03	1818201	1818400	*	1.33e-13	7.25e-11	28.5614	g2050	Genebody	CLASRP	PBC25536.1 Splicing factor, arginine/serine-rich [Apis cerana cerana]	-	-	-	-	GO:0005575//cellular_component;GO:0005622//intracellular;GO:0005623//cell;GO:0005634//nucleus;GO:0005654//nucleoplasm;GO:0031974//membrane-enclosed lumen;GO:0031981//nuclear lumen;GO:0043226//organelle;GO:0043227//membrane-bounded organelle;GO:0043229//intracellular organelle;GO:0043231//intracellular membrane-bounded organelle;GO:0043233//organelle lumen;GO:0044422//organelle part;GO:0044424//in…	-	GO:0006139//nucleobase-containing compound metabolic process;GO:0006396//RNA processing;GO:0006397//mRNA processing;GO:0006725//cellular aromatic compound metabolic process;GO:0006807//nitrogen compound metabolic process;GO:0008150//biological_process;GO:0008152//metabolic process;GO:0008380//RNA splicing;GO:0009987//cellular process;GO:0010467//gene expression;GO:0016070//RNA metabolic process;G…
LG03	1956101	1956300	*	3.59e-30	1.6e-26	52.5097	g2052	Genebody	--	PBC25534.1 hypothetical protein APICC_08525 [Apis cerana cerana]	-	-	-	-	-	GO:0005515//protein binding	-
LG03	1956201	1956400	*	4.37e-37	4e-33	52.4761	g2052	Genebody	--	PBC25534.1 hypothetical protein APICC_08525 [Apis cerana cerana]	-	-	-	-	-	GO:0005515//protein binding	-
LG03	2210501	2210700	*	2.48e-12	1.1e-09	-26.9601	g2067	Genebody	GCN1	XP_016922956.1 eIF-2-alpha kinase activator GCN1 [Apis cerana]	-	-	-	-	GO:0005575//cellular_component;GO:0005622//intracellular;GO:0005623//cell;GO:0005737//cytoplasm;GO:0005739//mitochondrion;GO:0005829//cytosol;GO:0005840//ribosome;GO:0005844//polysome;GO:0022626//cytosolic ribosome;GO:0030117//membrane coat;GO:0032991//macromolecular complex;GO:0043226//organelle;GO:0043227//membrane-bounded organelle;GO:0043228//non-membrane-bounded organelle;GO:0043229//intrace…	GO:0003674//molecular_function;GO:0003676//nucleic acid binding;GO:0003723//RNA binding;GO:0003735//structural constituent of ribosome;GO:0004674//protein serine/threonine kinase activity;GO:0005488//binding;GO:0005515//protein binding;GO:0008047//enzyme activator activity;GO:0008135//translation factor activity, RNA binding;GO:0019207//kinase regulator activity;GO:0019209//kinase activator activ…	GO:0000075//cell cycle checkpoint;GO:0000077//DNA damage checkpoint;GO:0000278//mitotic cell cycle;GO:0000302//response to reactive oxygen species;GO:0001932//regulation of protein phosphorylation;GO:0001934//positive regulation of protein phosphorylation;GO:0006355//regulation of transcription, DNA-templated;GO:0006357//regulation of transcription from RNA polymerase II promoter;GO:0006367//tran…
LG03	3600301	3600500	*	5.53e-42	7.91e-38	39.1304	g2110	Genebody	Efcab2	XP_016911697.1 dynein regulatory complex protein 8-like isoform X1 [Apis cerana]	-	-	-	-	GO:0005575//cellular_component;GO:0005622//intracellular;GO:0005623//cell;GO:0005737//cytoplasm;GO:0005856//cytoskeleton;GO:0005929//cilium;GO:0005930//axoneme;GO:0031514//motile cilium;GO:0032838//cell projection cytoplasm;GO:0042995//cell projection;GO:0043226//organelle;GO:0043228//non-membrane-bounded organelle;GO:0043229//intracellular organelle;GO:0043232//intracellular non-membrane-bounded…	GO:0003674//molecular_function;GO:0005488//binding;GO:0005509//calcium ion binding;GO:0043167//ion binding;GO:0043169//cation binding;GO:0046872//metal ion binding	-
LG03	3600401	3600600	*	5.18e-47	1.3e-42	25.2287	g2110	Genebody	Efcab2	XP_016911697.1 dynein regulatory complex protein 8-like isoform X1 [Apis cerana]	-	-	-	-	GO:0005575//cellular_component;GO:0005622//intracellular;GO:0005623//cell;GO:0005737//cytoplasm;GO:0005856//cytoskeleton;GO:0005929//cilium;GO:0005930//axoneme;GO:0031514//motile cilium;GO:0032838//cell projection cytoplasm;GO:0042995//cell projection;GO:0043226//organelle;GO:0043228//non-membrane-bounded organelle;GO:0043229//intracellular organelle;GO:0043232//intracellular non-membrane-bounded…	GO:0003674//molecular_function;GO:0005488//binding;GO:0005509//calcium ion binding;GO:0043167//ion binding;GO:0043169//cation binding;GO:0046872//metal ion binding	-
LG03	3600901	3601100	*	6.91e-21	1.03e-17	27.3644	g2111	Genebody	Cpsf1	XP_016911712.1 cleavage and polyadenylation specificity factor subunit 1 [Apis cerana]	Genetic Information Processing	Translation	ko03015//mRNA surveillance pathway	K14401	GO:0005575//cellular_component;GO:0005622//intracellular;GO:0005623//cell;GO:0005634//nucleus;GO:0005654//nucleoplasm;GO:0005847//mRNA cleavage and polyadenylation specificity factor complex;GO:0005849//mRNA cleavage factor complex;GO:0031974//membrane-enclosed lumen;GO:0031981//nuclear lumen;GO:0032991//macromolecular complex;GO:0043226//organelle;GO:0043227//membrane-bounded organelle;GO:004322…	GO:0003674//molecular_function;GO:0003676//nucleic acid binding;GO:0003723//RNA binding;GO:0003729//mRNA binding;GO:0003730//mRNA 3'-UTR binding;GO:0005488//binding;GO:0005515//protein binding;GO:0008092//cytoskeletal protein binding;GO:0017022//myosin binding;GO:0017091//AU-rich element binding;GO:0019899//enzyme binding;GO:0035925//mRNA 3'-UTR AU-rich region binding;GO:0097159//organic cyclic c…	GO:0000375//RNA splicing, via transesterification reactions;GO:0000377//RNA splicing, via transesterification reactions with bulged adenosine as nucleophile;GO:0000398//mRNA splicing, via spliceosome;GO:0006139//nucleobase-containing compound metabolic process;GO:0006351//transcription, DNA-templated;GO:0006353//DNA-templated transcription, termination;GO:0006366//transcription from RNA polymeras…
LG03	3601101	3601300	*	2.12e-17	1.98e-14	28.7115	g2111	Genebody	Cpsf1	XP_016911712.1 cleavage and polyadenylation specificity factor subunit 1 [Apis cerana]	Genetic Information Processing	Translation	ko03015//mRNA surveillance pathway	K14401	GO:0005575//cellular_component;GO:0005622//intracellular;GO:0005623//cell;GO:0005634//nucleus;GO:0005654//nucleoplasm;GO:0005847//mRNA cleavage and polyadenylation specificity factor complex;GO:0005849//mRNA cleavage factor complex;GO:0031974//membrane-enclosed lumen;GO:0031981//nuclear lumen;GO:0032991//macromolecular complex;GO:0043226//organelle;GO:0043227//membrane-bounded organelle;GO:004322…	GO:0003674//molecular_function;GO:0003676//nucleic acid binding;GO:0003723//RNA binding;GO:0003729//mRNA binding;GO:0003730//mRNA 3'-UTR binding;GO:0005488//binding;GO:0005515//protein binding;GO:0008092//cytoskeletal protein binding;GO:0017022//myosin binding;GO:0017091//AU-rich element binding;GO:0019899//enzyme binding;GO:0035925//mRNA 3'-UTR AU-rich region binding;GO:0097159//organic cyclic c…	GO:0000375//RNA splicing, via transesterification reactions;GO:0000377//RNA splicing, via transesterification reactions with bulged adenosine as nucleophile;GO:0000398//mRNA splicing, via spliceosome;GO:0006139//nucleobase-containing compound metabolic process;GO:0006351//transcription, DNA-templated;GO:0006353//DNA-templated transcription, termination;GO:0006366//transcription from RNA polymeras…
LG03	3601201	3601400	*	1.71e-13	9.21e-11	28.2229	g2111	Genebody	Cpsf1	XP_016911712.1 cleavage and polyadenylation specificity factor subunit 1 [Apis cerana]	Genetic Information Processing	Translation	ko03015//mRNA surveillance pathway	K14401	GO:0005575//cellular_component;GO:0005622//intracellular;GO:0005623//cell;GO:0005634//nucleus;GO:0005654//nucleoplasm;GO:0005847//mRNA cleavage and polyadenylation specificity factor complex;GO:0005849//mRNA cleavage factor complex;GO:0031974//membrane-enclosed lumen;GO:0031981//nuclear lumen;GO:0032991//macromolecular complex;GO:0043226//organelle;GO:0043227//membrane-bounded organelle;GO:004322…	GO:0003674//molecular_function;GO:0003676//nucleic acid binding;GO:0003723//RNA binding;GO:0003729//mRNA binding;GO:0003730//mRNA 3'-UTR binding;GO:0005488//binding;GO:0005515//protein binding;GO:0008092//cytoskeletal protein binding;GO:0017022//myosin binding;GO:0017091//AU-rich element binding;GO:0019899//enzyme binding;GO:0035925//mRNA 3'-UTR AU-rich region binding;GO:0097159//organic cyclic c…	GO:0000375//RNA splicing, via transesterification reactions;GO:0000377//RNA splicing, via transesterification reactions with bulged adenosine as nucleophile;GO:0000398//mRNA splicing, via spliceosome;GO:0006139//nucleobase-containing compound metabolic process;GO:0006351//transcription, DNA-templated;GO:0006353//DNA-templated transcription, termination;GO:0006366//transcription from RNA polymeras…
LG03	4034101	4034300	*	2.1e-28	7.66e-25	-28.93	g2120	Genebody	abhd17b	PBC28900.1 Abhydrolase domain-containing protein [Apis cerana cerana]	-	-	-	-	GO:0005575//cellular_component;GO:0005622//intracellular;GO:0005623//cell;GO:0005737//cytoplasm;GO:0030425//dendrite;GO:0031410//cytoplasmic vesicle;GO:0031982//vesicle;GO:0036477//somatodendritic compartment;GO:0042995//cell projection;GO:0043005//neuron projection;GO:0043226//organelle;GO:0043227//membrane-bounded organelle;GO:0043229//intracellular organelle;GO:0044424//intracellular part;GO:0…	GO:0008236//serine-type peptidase activity;GO:0016787//hydrolase activity;GO:0047570//3-oxoadipate enol-lactonase activity	GO:0003008//system process;GO:0006508//proteolysis;GO:0006950//response to stress;GO:0007610//behavior;GO:0007611//learning or memory;GO:0007612//learning;GO:0008150//biological_process;GO:0008306//associative learning;GO:0009605//response to external stimulus;GO:0009991//response to extracellular stimulus;GO:0031667//response to nutrient levels;GO:0032501//multicellular organismal process;GO:004…
LG03	4185301	4185500	*	5.26e-32	2.87e-28	50.8133	g2132	Genebody	RPH3A	XP_016911658.1 tricalbin-1-like isoform X1 [Apis cerana]	-	-	-	-	GO:0005882//intermediate filament	GO:0005200//structural constituent of cytoskeleton	-
LG03	4185401	4185600	*	1.53e-30	6.99e-27	36.9698	g2132	Genebody	RPH3A	XP_016911658.1 tricalbin-1-like isoform X1 [Apis cerana]	-	-	-	-	GO:0005882//intermediate filament	GO:0005200//structural constituent of cytoskeleton	-
LG03	4185501	4185700	*	2.72e-23	5.34e-20	28.6273	g2132	Genebody	RPH3A	XP_016911658.1 tricalbin-1-like isoform X1 [Apis cerana]	-	-	-	-	GO:0005882//intermediate filament	GO:0005200//structural constituent of cytoskeleton	-
LG03	4185801	4186000	*	5.89e-25	1.38e-21	39.7728	g2132	Genebody	RPH3A	XP_016911658.1 tricalbin-1-like isoform X1 [Apis cerana]	-	-	-	-	GO:0005882//intermediate filament	GO:0005200//structural constituent of cytoskeleton	-
LG03	4236601	4236800	*	7.98e-14	4.52e-11	28.8272	g2136	Genebody	GCC1	XP_031365684.1 GRIP and coiled-coil domain-containing protein 1 [Apis dorsata]	-	-	-	-	GO:0000138//Golgi trans cisterna;GO:0000139//Golgi membrane;GO:0005575//cellular_component;GO:0005622//intracellular;GO:0005623//cell;GO:0005737//cytoplasm;GO:0005794//Golgi apparatus;GO:0005795//Golgi stack;GO:0005829//cytosol;GO:0005886//plasma membrane;GO:0012505//endomembrane system;GO:0016020//membrane;GO:0031090//organelle membrane;GO:0031984//organelle subcompartment;GO:0031985//Golgi cist…	GO:0003674//molecular_function;GO:0005488//binding;GO:0005515//protein binding;GO:0017016//Ras GTPase binding;GO:0017137//Rab GTPase binding;GO:0019899//enzyme binding;GO:0030306//ADP-ribosylation factor binding;GO:0031267//small GTPase binding;GO:0042802//identical protein binding;GO:0042803//protein homodimerization activity;GO:0046983//protein dimerization activity;GO:0051020//GTPase binding	GO:0006606//protein import into nucleus;GO:0006810//transport;GO:0008150//biological_process;GO:0016192//vesicle-mediated transport;GO:0048193//Golgi vesicle transport;GO:0051179//localization;GO:0051234//establishment of localization
LG03	6054201	6054400	*	6.74e-14	3.86e-11	-30.0683	g2206	Genebody	rudhira	PBC34678.1 Breast carcinoma-amplified sequence [Apis cerana cerana]	-	-	-	-	GO:0000785//chromatin;GO:0005575//cellular_component;GO:0005622//intracellular;GO:0005623//cell;GO:0005634//nucleus;GO:0005694//chromosome;GO:0005730//nucleolus;GO:0005737//cytoplasm;GO:0005856//cytoskeleton;GO:0005874//microtubule;GO:0005881//cytoplasmic microtubule;GO:0015630//microtubule cytoskeleton;GO:0031252//cell leading edge;GO:0031974//membrane-enclosed lumen;GO:0031981//nuclear lumen;GO…	GO:0003674//molecular_function;GO:0003682//chromatin binding;GO:0005102//receptor binding;GO:0005488//binding;GO:0005515//protein binding;GO:0008047//enzyme activator activity;GO:0008092//cytoskeletal protein binding;GO:0008134//transcription factor binding;GO:0010698//acetyltransferase activator activity;GO:0015631//tubulin binding;GO:0019899//enzyme binding;GO:0030234//enzyme regulator activity…	GO:0000226//microtubule cytoskeleton organization;GO:0001525//angiogenesis;GO:0001568//blood vessel development;GO:0001944//vasculature development;GO:0001952//regulation of cell-matrix adhesion;GO:0001953//negative regulation of cell-matrix adhesion;GO:0006139//nucleobase-containing compound metabolic process;GO:0006351//transcription, DNA-templated;GO:0006355//regulation of transcription, DNA-t…
LG03	6642301	6642500	*	8.29e-39	8.95e-35	44.4989	g2247	Genebody	Ttc28	XP_016910588.1 tetratricopeptide repeat protein 28 isoform X1 [Apis cerana]	-	-	-	-	GO:0000922//spindle pole;GO:0005575//cellular_component;GO:0005622//intracellular;GO:0005623//cell;GO:0005737//cytoplasm;GO:0005813//centrosome;GO:0005815//microtubule organizing center;GO:0005819//spindle;GO:0005852//eukaryotic translation initiation factor 3 complex;GO:0005856//cytoskeleton;GO:0015630//microtubule cytoskeleton;GO:0030496//midbody;GO:0043226//organelle;GO:0043228//non-membrane-b…	GO:0003674//molecular_function;GO:0003743//translation initiation factor activity;GO:0005488//binding;GO:0005515//protein binding;GO:0019899//enzyme binding;GO:0019900//kinase binding;GO:0033130//acetylcholine receptor binding;GO:0042802//identical protein binding;GO:0043495//protein anchor	GO:0007049//cell cycle;GO:0007268//synaptic transmission;GO:0007346//regulation of mitotic cell cycle;GO:0008150//biological_process;GO:0009987//cellular process;GO:0050789//regulation of biological process;GO:0050794//regulation of cellular process;GO:0051301//cell division;GO:0051726//regulation of cell cycle;GO:0065007//biological regulation
LG03	6642401	6642600	*	8.29e-39	8.95e-35	44.4989	g2247	Genebody	Ttc28	XP_016910588.1 tetratricopeptide repeat protein 28 isoform X1 [Apis cerana]	-	-	-	-	GO:0000922//spindle pole;GO:0005575//cellular_component;GO:0005622//intracellular;GO:0005623//cell;GO:0005737//cytoplasm;GO:0005813//centrosome;GO:0005815//microtubule organizing center;GO:0005819//spindle;GO:0005852//eukaryotic translation initiation factor 3 complex;GO:0005856//cytoskeleton;GO:0015630//microtubule cytoskeleton;GO:0030496//midbody;GO:0043226//organelle;GO:0043228//non-membrane-b…	GO:0003674//molecular_function;GO:0003743//translation initiation factor activity;GO:0005488//binding;GO:0005515//protein binding;GO:0019899//enzyme binding;GO:0019900//kinase binding;GO:0033130//acetylcholine receptor binding;GO:0042802//identical protein binding;GO:0043495//protein anchor	GO:0007049//cell cycle;GO:0007268//synaptic transmission;GO:0007346//regulation of mitotic cell cycle;GO:0008150//biological_process;GO:0009987//cellular process;GO:0050789//regulation of biological process;GO:0050794//regulation of cellular process;GO:0051301//cell division;GO:0051726//regulation of cell cycle;GO:0065007//biological regulation
LG03	6648301	6648500	*	1.53e-14	9.59e-12	31.8478	g2249	Genebody	Sbf2	PBC34636.1 Myotubularin-related protein [Apis cerana cerana]	-	-	-	-	GO:0000123//histone acetyltransferase complex;GO:0005575//cellular_component;GO:0005622//intracellular;GO:0005623//cell;GO:0005634//nucleus;GO:0005654//nucleoplasm;GO:0005694//chromosome;GO:0005700//polytene chromosome;GO:0005737//cytoplasm;GO:0005768//endosome;GO:0005938//cell cortex;GO:0008023//transcription elongation factor complex;GO:0012505//endomembrane system;GO:0030117//membrane coat;GO:…	GO:0003674//molecular_function;GO:0003682//chromatin binding;GO:0005085//guanyl-nucleotide exchange factor activity;GO:0005088//Ras guanyl-nucleotide exchange factor activity;GO:0005488//binding;GO:0005515//protein binding;GO:0017016//Ras GTPase binding;GO:0017112//Rab guanyl-nucleotide exchange factor activity;GO:0017137//Rab GTPase binding;GO:0019899//enzyme binding;GO:0019900//kinase binding;G…	GO:0000278//mitotic cell cycle;GO:0006325//chromatin organization;GO:0006355//regulation of transcription, DNA-templated;GO:0006357//regulation of transcription from RNA polymerase II promoter;GO:0006464//cellular protein modification process;GO:0006473//protein acetylation;GO:0006475//internal protein amino acid acetylation;GO:0006479//protein methylation;GO:0006807//nitrogen compound metabolic …
LG03	6649801	6650000	*	1.23e-24	2.78e-21	40.9753	g2249	Genebody	Sbf2	PBC34636.1 Myotubularin-related protein [Apis cerana cerana]	-	-	-	-	GO:0000123//histone acetyltransferase complex;GO:0005575//cellular_component;GO:0005622//intracellular;GO:0005623//cell;GO:0005634//nucleus;GO:0005654//nucleoplasm;GO:0005694//chromosome;GO:0005700//polytene chromosome;GO:0005737//cytoplasm;GO:0005768//endosome;GO:0005938//cell cortex;GO:0008023//transcription elongation factor complex;GO:0012505//endomembrane system;GO:0030117//membrane coat;GO:…	GO:0003674//molecular_function;GO:0003682//chromatin binding;GO:0005085//guanyl-nucleotide exchange factor activity;GO:0005088//Ras guanyl-nucleotide exchange factor activity;GO:0005488//binding;GO:0005515//protein binding;GO:0017016//Ras GTPase binding;GO:0017112//Rab guanyl-nucleotide exchange factor activity;GO:0017137//Rab GTPase binding;GO:0019899//enzyme binding;GO:0019900//kinase binding;G…	GO:0000278//mitotic cell cycle;GO:0006325//chromatin organization;GO:0006355//regulation of transcription, DNA-templated;GO:0006357//regulation of transcription from RNA polymerase II promoter;GO:0006464//cellular protein modification process;GO:0006473//protein acetylation;GO:0006475//internal protein amino acid acetylation;GO:0006479//protein methylation;GO:0006807//nitrogen compound metabolic …
LG03	6649901	6650100	*	2.37e-16	1.91e-13	38.8049	g2249	Genebody	Sbf2	PBC34636.1 Myotubularin-related protein [Apis cerana cerana]	-	-	-	-	GO:0000123//histone acetyltransferase complex;GO:0005575//cellular_component;GO:0005622//intracellular;GO:0005623//cell;GO:0005634//nucleus;GO:0005654//nucleoplasm;GO:0005694//chromosome;GO:0005700//polytene chromosome;GO:0005737//cytoplasm;GO:0005768//endosome;GO:0005938//cell cortex;GO:0008023//transcription elongation factor complex;GO:0012505//endomembrane system;GO:0030117//membrane coat;GO:…	GO:0003674//molecular_function;GO:0003682//chromatin binding;GO:0005085//guanyl-nucleotide exchange factor activity;GO:0005088//Ras guanyl-nucleotide exchange factor activity;GO:0005488//binding;GO:0005515//protein binding;GO:0017016//Ras GTPase binding;GO:0017112//Rab guanyl-nucleotide exchange factor activity;GO:0017137//Rab GTPase binding;GO:0019899//enzyme binding;GO:0019900//kinase binding;G…	GO:0000278//mitotic cell cycle;GO:0006325//chromatin organization;GO:0006355//regulation of transcription, DNA-templated;GO:0006357//regulation of transcription from RNA polymerase II promoter;GO:0006464//cellular protein modification process;GO:0006473//protein acetylation;GO:0006475//internal protein amino acid acetylation;GO:0006479//protein methylation;GO:0006807//nitrogen compound metabolic …
LG03	6653401	6653600	*	1.73e-20	2.43e-17	38.7313	g2249	Genebody	Sbf2	PBC34636.1 Myotubularin-related protein [Apis cerana cerana]	-	-	-	-	GO:0000123//histone acetyltransferase complex;GO:0005575//cellular_component;GO:0005622//intracellular;GO:0005623//cell;GO:0005634//nucleus;GO:0005654//nucleoplasm;GO:0005694//chromosome;GO:0005700//polytene chromosome;GO:0005737//cytoplasm;GO:0005768//endosome;GO:0005938//cell cortex;GO:0008023//transcription elongation factor complex;GO:0012505//endomembrane system;GO:0030117//membrane coat;GO:…	GO:0003674//molecular_function;GO:0003682//chromatin binding;GO:0005085//guanyl-nucleotide exchange factor activity;GO:0005088//Ras guanyl-nucleotide exchange factor activity;GO:0005488//binding;GO:0005515//protein binding;GO:0017016//Ras GTPase binding;GO:0017112//Rab guanyl-nucleotide exchange factor activity;GO:0017137//Rab GTPase binding;GO:0019899//enzyme binding;GO:0019900//kinase binding;G…	GO:0000278//mitotic cell cycle;GO:0006325//chromatin organization;GO:0006355//regulation of transcription, DNA-templated;GO:0006357//regulation of transcription from RNA polymerase II promoter;GO:0006464//cellular protein modification process;GO:0006473//protein acetylation;GO:0006475//internal protein amino acid acetylation;GO:0006479//protein methylation;GO:0006807//nitrogen compound metabolic …
LG03	6667301	6667500	*	1.07e-10	3.62e-08	-30.7136	g2251	Genebody	Ubr2	PBC34634.1 E3 ubiquitin-protein ligase [Apis cerana cerana]	-	-	-	-	GO:0000151//ubiquitin ligase complex;GO:0005575//cellular_component;GO:0005622//intracellular;GO:0005623//cell;GO:0005737//cytoplasm;GO:0008023//transcription elongation factor complex;GO:0032991//macromolecular complex;GO:0044424//intracellular part;GO:0044464//cell part;GO:1902494//catalytic complex;GO:1990234//transferase complex	GO:0003674//molecular_function;GO:0003824//catalytic activity;GO:0004842//ubiquitin-protein transferase activity;GO:0005488//binding;GO:0008270//zinc ion binding;GO:0016740//transferase activity;GO:0019787//ubiquitin-like protein transferase activity;GO:0043167//ion binding;GO:0043169//cation binding;GO:0046872//metal ion binding;GO:0046914//transition metal ion binding;GO:0061630//ubiquitin prot…	GO:0006368//transcription elongation from RNA polymerase II promoter;GO:0006464//cellular protein modification process;GO:0006508//proteolysis;GO:0006511//ubiquitin-dependent protein catabolic process;GO:0006807//nitrogen compound metabolic process;GO:0008150//biological_process;GO:0008152//metabolic process;GO:0009056//catabolic process;GO:0009057//macromolecule catabolic process;GO:0009987//cel…
LG03	6667401	6667600	*	3.48e-11	1.28e-08	-26.8087	g2251	Genebody	Ubr2	PBC34634.1 E3 ubiquitin-protein ligase [Apis cerana cerana]	-	-	-	-	GO:0000151//ubiquitin ligase complex;GO:0005575//cellular_component;GO:0005622//intracellular;GO:0005623//cell;GO:0005737//cytoplasm;GO:0008023//transcription elongation factor complex;GO:0032991//macromolecular complex;GO:0044424//intracellular part;GO:0044464//cell part;GO:1902494//catalytic complex;GO:1990234//transferase complex	GO:0003674//molecular_function;GO:0003824//catalytic activity;GO:0004842//ubiquitin-protein transferase activity;GO:0005488//binding;GO:0008270//zinc ion binding;GO:0016740//transferase activity;GO:0019787//ubiquitin-like protein transferase activity;GO:0043167//ion binding;GO:0043169//cation binding;GO:0046872//metal ion binding;GO:0046914//transition metal ion binding;GO:0061630//ubiquitin prot…	GO:0006368//transcription elongation from RNA polymerase II promoter;GO:0006464//cellular protein modification process;GO:0006508//proteolysis;GO:0006511//ubiquitin-dependent protein catabolic process;GO:0006807//nitrogen compound metabolic process;GO:0008150//biological_process;GO:0008152//metabolic process;GO:0009056//catabolic process;GO:0009057//macromolecule catabolic process;GO:0009987//cel…
LG03	6668501	6668700	*	2.96e-09	7.56e-07	-25.3243	g2251	Genebody	Ubr2	PBC34634.1 E3 ubiquitin-protein ligase [Apis cerana cerana]	-	-	-	-	GO:0000151//ubiquitin ligase complex;GO:0005575//cellular_component;GO:0005622//intracellular;GO:0005623//cell;GO:0005737//cytoplasm;GO:0008023//transcription elongation factor complex;GO:0032991//macromolecular complex;GO:0044424//intracellular part;GO:0044464//cell part;GO:1902494//catalytic complex;GO:1990234//transferase complex	GO:0003674//molecular_function;GO:0003824//catalytic activity;GO:0004842//ubiquitin-protein transferase activity;GO:0005488//binding;GO:0008270//zinc ion binding;GO:0016740//transferase activity;GO:0019787//ubiquitin-like protein transferase activity;GO:0043167//ion binding;GO:0043169//cation binding;GO:0046872//metal ion binding;GO:0046914//transition metal ion binding;GO:0061630//ubiquitin prot…	GO:0006368//transcription elongation from RNA polymerase II promoter;GO:0006464//cellular protein modification process;GO:0006508//proteolysis;GO:0006511//ubiquitin-dependent protein catabolic process;GO:0006807//nitrogen compound metabolic process;GO:0008150//biological_process;GO:0008152//metabolic process;GO:0009056//catabolic process;GO:0009057//macromolecule catabolic process;GO:0009987//cel…
LG03	7819301	7819500	*	3.59e-12	1.56e-09	30.3851	g2270	Genebody	MBTPS2	PBC34618.1 Membrane-bound transcription factor site-2 protease [Apis cerana cerana]	Genetic Information Processing	Folding, sorting and degradation	ko04141//Protein processing in endoplasmic reticulum	K07765	GO:0000139//Golgi membrane;GO:0005575//cellular_component;GO:0005622//intracellular;GO:0005623//cell;GO:0005737//cytoplasm;GO:0005783//endoplasmic reticulum;GO:0005789//endoplasmic reticulum membrane;GO:0005794//Golgi apparatus;GO:0012505//endomembrane system;GO:0016020//membrane;GO:0016021//integral component of membrane;GO:0031090//organelle membrane;GO:0031224//intrinsic component of membrane;…	GO:0003674//molecular_function;GO:0003824//catalytic activity;GO:0004175//endopeptidase activity;GO:0004222//metalloendopeptidase activity;GO:0005488//binding;GO:0008233//peptidase activity;GO:0008237//metallopeptidase activity;GO:0015078//hydrogen ion transmembrane transporter activity;GO:0016787//hydrolase activity;GO:0043167//ion binding;GO:0043169//cation binding;GO:0046872//metal ion binding…	GO:0006066//alcohol metabolic process;GO:0006355//regulation of transcription, DNA-templated;GO:0006357//regulation of transcription from RNA polymerase II promoter;GO:0006508//proteolysis;GO:0006629//lipid metabolic process;GO:0006807//nitrogen compound metabolic process;GO:0006950//response to stress;GO:0006970//response to osmotic stress;GO:0006972//hyperosmotic response;GO:0006984//ER-nucleus…
LG03	7819401	7819600	*	2.9e-11	1.08e-08	25.8949	g2270	Genebody	MBTPS2	PBC34618.1 Membrane-bound transcription factor site-2 protease [Apis cerana cerana]	Genetic Information Processing	Folding, sorting and degradation	ko04141//Protein processing in endoplasmic reticulum	K07765	GO:0000139//Golgi membrane;GO:0005575//cellular_component;GO:0005622//intracellular;GO:0005623//cell;GO:0005737//cytoplasm;GO:0005783//endoplasmic reticulum;GO:0005789//endoplasmic reticulum membrane;GO:0005794//Golgi apparatus;GO:0012505//endomembrane system;GO:0016020//membrane;GO:0016021//integral component of membrane;GO:0031090//organelle membrane;GO:0031224//intrinsic component of membrane;…	GO:0003674//molecular_function;GO:0003824//catalytic activity;GO:0004175//endopeptidase activity;GO:0004222//metalloendopeptidase activity;GO:0005488//binding;GO:0008233//peptidase activity;GO:0008237//metallopeptidase activity;GO:0015078//hydrogen ion transmembrane transporter activity;GO:0016787//hydrolase activity;GO:0043167//ion binding;GO:0043169//cation binding;GO:0046872//metal ion binding…	GO:0006066//alcohol metabolic process;GO:0006355//regulation of transcription, DNA-templated;GO:0006357//regulation of transcription from RNA polymerase II promoter;GO:0006508//proteolysis;GO:0006629//lipid metabolic process;GO:0006807//nitrogen compound metabolic process;GO:0006950//response to stress;GO:0006970//response to osmotic stress;GO:0006972//hyperosmotic response;GO:0006984//ER-nucleus…
LG03	7834901	7835100	*	1.39e-08	3.11e-06	25.8192	g2273	Genebody	Pgap6	PBC34615.1 TransmembraneA [Apis cerana cerana]	-	-	-	-	GO:0016021//integral component of membrane	-	-
LG03	9037101	9037300	*	9.11e-19	1.02e-15	-27.7559	g2295	Genebody	Itpr	PBC34595.1 Inositol 1,4,5-trisphosphate receptor [Apis cerana cerana]	Human Diseases;Human Diseases;Human Diseases;Human Diseases;Cellular Processes;Environmental Information Processing;Human Diseases;Human Diseases;Human Diseases;Environmental Information Processing;Organismal Systems;Organismal Systems;Cellular Processes;Cellular Processes;Organismal Systems;Organismal Systems;Organismal Systems;Environmental Information Processing;Organismal Systems;Organismal S…	Neurodegenerative diseases;Neurodegenerative diseases;Infectious diseases;Cancers;Transport and catabolism;Signal transduction;Endocrine and metabolic diseases;Infectious diseases;Infectious disease: viral;Signal transduction;Nervous system;Endocrine system;Cell growth and death;Cell growth and death;Nervous system;Endocrine system;Digestive system;Signal transduction;Endocrine system;Endocrine s…	ko05016//Huntington disease;ko05010//Alzheimer disease;ko05131//Shigellosis;ko05205//Proteoglycans in cancer;ko04140//Autophagy - animal;ko04022//cGMP - PKG signaling pathway;ko04934//Cushing syndrome;ko05163//Human cytomegalovirus infection;ko05170//Human immunodeficiency virus 1 infection;ko04020//Calcium signaling pathway;ko04723//Retrograde endocannabinoid signaling;ko04921//Oxytocin signalin…	K04958;K04958;K04958;K04958;K04958;K04958;K04958;K04958;K04958;K04958;K04958;K04958;K04958;K04958;K04958;K04958;K04958;K04958;K04958;K04958;K04958;K04958;K04958;K04958;K04958;K04958;K04958;K04958;K04958;K04958;K04958;K04958;K04958;K04958;K04958;K04958;K04958;K04958;K04958;K04958;K04958;K04958;K04958;K04958;K04958;K04958	GO:0005575//cellular_component;GO:0005622//intracellular;GO:0005623//cell;GO:0005634//nucleus;GO:0005635//nuclear envelope;GO:0005637//nuclear inner membrane;GO:0005730//nucleolus;GO:0005737//cytoplasm;GO:0005783//endoplasmic reticulum;GO:0005789//endoplasmic reticulum membrane;GO:0005790//smooth endoplasmic reticulum;GO:0005791//rough endoplasmic reticulum;GO:0005886//plasma membrane;GO:0005955/…	GO:0003674//molecular_function;GO:0005215//transporter activity;GO:0005216//ion channel activity;GO:0005217//intracellular ligand-gated ion channel activity;GO:0005220//inositol 1,4,5-trisphosphate-sensitive calcium-release channel activity;GO:0005246//calcium channel regulator activity;GO:0005261//cation channel activity;GO:0005262//calcium channel activity;GO:0005488//binding;GO:0005509//calciu…	GO:0000003//reproduction;GO:0000280//nuclear division;GO:0001556//oocyte maturation;GO:0001666//response to hypoxia;GO:0001775//cell activation;GO:0002165//instar larval or pupal development;GO:0002791//regulation of peptide secretion;GO:0003006//developmental process involved in reproduction;GO:0003008//system process;GO:0003012//muscle system process;GO:0006810//transport;GO:0006811//ion transp…
LG03	9336101	9336300	*	4.79e-75	1.2e-69	35.2161	g2318	Genebody	--	PBC34572.1 30S ribosomal protein S6 [Apis cerana cerana]	-	-	-	-	-	GO:0003700//transcription factor activity, sequence-specific DNA binding	GO:0006355//regulation of transcription, DNA-templated
LG03	9336201	9336400	*	1.58e-70	3.47e-65	33.4966	g2318	Genebody	--	PBC34572.1 30S ribosomal protein S6 [Apis cerana cerana]	-	-	-	-	-	GO:0003700//transcription factor activity, sequence-specific DNA binding	GO:0006355//regulation of transcription, DNA-templated
LG03	9336301	9336500	*	6.1e-25	1.42e-21	26.6502	g2318	Genebody	--	PBC34572.1 30S ribosomal protein S6 [Apis cerana cerana]	-	-	-	-	-	GO:0003700//transcription factor activity, sequence-specific DNA binding	GO:0006355//regulation of transcription, DNA-templated
LG03	9819201	9819400	*	6.97e-25	1.61e-21	-25.8348	g2364	Genebody	SPG11	PBC28068.1 Spatacsin [Apis cerana cerana]	-	-	-	-	GO:0005575//cellular_component;GO:0005622//intracellular;GO:0005623//cell;GO:0005634//nucleus;GO:0005730//nucleolus;GO:0005737//cytoplasm;GO:0005829//cytosol;GO:0005886//plasma membrane;GO:0016020//membrane;GO:0030054//cell junction;GO:0030424//axon;GO:0030425//dendrite;GO:0031410//cytoplasmic vesicle;GO:0031974//membrane-enclosed lumen;GO:0031981//nuclear lumen;GO:0031982//vesicle;GO:0036477//so…	GO:0003674//molecular_function	GO:0000902//cell morphogenesis;GO:0000904//cell morphogenesis involved in differentiation;GO:0001845//phagolysosome assembly;GO:0006810//transport;GO:0006897//endocytosis;GO:0006906//vesicle fusion;GO:0006909//phagocytosis;GO:0006928//movement of cell or subcellular component;GO:0006996//organelle organization;GO:0007017//microtubule-based process;GO:0007018//microtubule-based movement;GO:0007033…
LG03	9819301	9819500	*	8.97e-22	1.48e-18	-29.2293	g2364	Genebody	SPG11	PBC28068.1 Spatacsin [Apis cerana cerana]	-	-	-	-	GO:0005575//cellular_component;GO:0005622//intracellular;GO:0005623//cell;GO:0005634//nucleus;GO:0005730//nucleolus;GO:0005737//cytoplasm;GO:0005829//cytosol;GO:0005886//plasma membrane;GO:0016020//membrane;GO:0030054//cell junction;GO:0030424//axon;GO:0030425//dendrite;GO:0031410//cytoplasmic vesicle;GO:0031974//membrane-enclosed lumen;GO:0031981//nuclear lumen;GO:0031982//vesicle;GO:0036477//so…	GO:0003674//molecular_function	GO:0000902//cell morphogenesis;GO:0000904//cell morphogenesis involved in differentiation;GO:0001845//phagolysosome assembly;GO:0006810//transport;GO:0006897//endocytosis;GO:0006906//vesicle fusion;GO:0006909//phagocytosis;GO:0006928//movement of cell or subcellular component;GO:0006996//organelle organization;GO:0007017//microtubule-based process;GO:0007018//microtubule-based movement;GO:0007033…
LG03	9843701	9843900	*	7.04e-25	1.63e-21	33.4332	g2368	Genebody	gek	PBC28072.1 Serine/threonine-protein kinase Genghis Khan [Apis cerana cerana]	-	-	-	-	GO:0005575//cellular_component;GO:0005622//intracellular;GO:0005623//cell;GO:0005737//cytoplasm;GO:0016459//myosin complex;GO:0030424//axon;GO:0030426//growth cone;GO:0030427//site of polarized growth;GO:0033267//axon part;GO:0042995//cell projection;GO:0043005//neuron projection;GO:0044424//intracellular part;GO:0044463//cell projection part;GO:0044464//cell part;GO:0097458//neuron part	GO:0000166//nucleotide binding;GO:0003674//molecular_function;GO:0003824//catalytic activity;GO:0004672//protein kinase activity;GO:0004674//protein serine/threonine kinase activity;GO:0004697//protein kinase C activity;GO:0005488//binding;GO:0005515//protein binding;GO:0005524//ATP binding;GO:0008144//drug binding;GO:0016301//kinase activity;GO:0016740//transferase activity;GO:0016772//transfera…	GO:0002009//morphogenesis of an epithelium;GO:0002119//nematode larval development;GO:0002164//larval development;GO:0006464//cellular protein modification process;GO:0006468//protein phosphorylation;GO:0006793//phosphorus metabolic process;GO:0006796//phosphate-containing compound metabolic process;GO:0006807//nitrogen compound metabolic process;GO:0006996//organelle organization;GO:0007010//cyt…
LG03	9843801	9844000	*	1.6e-33	1.04e-29	38.6145	g2368	Genebody	gek	PBC28072.1 Serine/threonine-protein kinase Genghis Khan [Apis cerana cerana]	-	-	-	-	GO:0005575//cellular_component;GO:0005622//intracellular;GO:0005623//cell;GO:0005737//cytoplasm;GO:0016459//myosin complex;GO:0030424//axon;GO:0030426//growth cone;GO:0030427//site of polarized growth;GO:0033267//axon part;GO:0042995//cell projection;GO:0043005//neuron projection;GO:0044424//intracellular part;GO:0044463//cell projection part;GO:0044464//cell part;GO:0097458//neuron part	GO:0000166//nucleotide binding;GO:0003674//molecular_function;GO:0003824//catalytic activity;GO:0004672//protein kinase activity;GO:0004674//protein serine/threonine kinase activity;GO:0004697//protein kinase C activity;GO:0005488//binding;GO:0005515//protein binding;GO:0005524//ATP binding;GO:0008144//drug binding;GO:0016301//kinase activity;GO:0016740//transferase activity;GO:0016772//transfera…	GO:0002009//morphogenesis of an epithelium;GO:0002119//nematode larval development;GO:0002164//larval development;GO:0006464//cellular protein modification process;GO:0006468//protein phosphorylation;GO:0006793//phosphorus metabolic process;GO:0006796//phosphate-containing compound metabolic process;GO:0006807//nitrogen compound metabolic process;GO:0006996//organelle organization;GO:0007010//cyt…
LG03	9902801	9903000	*	1.01e-12	4.79e-10	27.3684	g2376	Genebody	lid	XP_006615259.1 lysine-specific demethylase lid isoform X1 [Apis dorsata]	-	-	-	-	GO:0000118//histone deacetylase complex;GO:0000228//nuclear chromosome;GO:0000785//chromatin;GO:0000790//nuclear chromatin;GO:0005575//cellular_component;GO:0005622//intracellular;GO:0005623//cell;GO:0005634//nucleus;GO:0005654//nucleoplasm;GO:0005694//chromosome;GO:0005737//cytoplasm;GO:0031974//membrane-enclosed lumen;GO:0031981//nuclear lumen;GO:0032991//macromolecular complex;GO:0043226//orga…	GO:0000287//magnesium ion binding;GO:0003674//molecular_function;GO:0003676//nucleic acid binding;GO:0003677//DNA binding;GO:0003824//catalytic activity;GO:0004721//phosphoprotein phosphatase activity;GO:0005488//binding;GO:0005515//protein binding;GO:0016491//oxidoreductase activity;GO:0016705//oxidoreductase activity, acting on paired donors, with incorporation or reduction of molecular oxygen;…	GO:0000003//reproduction;GO:0000122//negative regulation of transcription from RNA polymerase II promoter;GO:0000183//chromatin silencing at rDNA;GO:0002164//larval development;GO:0003006//developmental process involved in reproduction;GO:0006139//nucleobase-containing compound metabolic process;GO:0006325//chromatin organization;GO:0006342//chromatin silencing;GO:0006351//transcription, DNA-temp…
LG03	10072501	10072700	*	2.14e-10	6.82e-08	-25.1304	g2388	Genebody	COPA	XP_016910279.2 coatomer subunit alpha [Apis cerana]	-	-	-	-	GO:0000139//Golgi membrane;GO:0005575//cellular_component;GO:0005576//extracellular region;GO:0005615//extracellular space;GO:0005622//intracellular;GO:0005623//cell;GO:0005737//cytoplasm;GO:0005783//endoplasmic reticulum;GO:0005789//endoplasmic reticulum membrane;GO:0005793//endoplasmic reticulum-Golgi intermediate compartment;GO:0005794//Golgi apparatus;GO:0005798//Golgi-associated vesicle;GO:0…	GO:0003674//molecular_function;GO:0005102//receptor binding;GO:0005179//hormone activity;GO:0005198//structural molecule activity;GO:0005488//binding;GO:0005515//protein binding;GO:0030545//receptor regulator activity;GO:0032182//ubiquitin-like protein binding;GO:0043130//ubiquitin binding;GO:0048018//receptor agonist activity;GO:0098772//molecular function regulator	GO:0000003//reproduction;GO:0000280//nuclear division;GO:0000902//cell morphogenesis;GO:0000910//cytokinesis;GO:0003008//system process;GO:0006810//transport;GO:0006886//intracellular protein transport;GO:0006888//ER to Golgi vesicle-mediated transport;GO:0006890//retrograde vesicle-mediated transport, Golgi to ER;GO:0006891//intra-Golgi vesicle-mediated transport;GO:0006996//organelle organizati…
LG03	10158901	10159100	*	8.28e-15	5.42e-12	-33.9918	g2392	Genebody	sub	PBC28094.1 Kinesin protein KIF20A [Apis cerana cerana]	-	-	-	-	-	GO:0005524//ATP binding;GO:0008017//microtubule binding	GO:0007018//microtubule-based movement;GO:0007059//chromosome segregation;GO:0030261//chromosome condensation
LG03	12076001	12076200	*	6.3e-20	8.2e-17	-42.9659	g2473	Genebody	Kdm2	XP_006622409.1 jmjC domain-containing histone demethylation protein 1-like [Apis dorsata]	-	-	-	-	GO:0000151//ubiquitin ligase complex;GO:0005575//cellular_component;GO:0005622//intracellular;GO:0005623//cell;GO:0005634//nucleus;GO:0019005//SCF ubiquitin ligase complex;GO:0031461//cullin-RING ubiquitin ligase complex;GO:0031519//PcG protein complex;GO:0032991//macromolecular complex;GO:0043226//organelle;GO:0043227//membrane-bounded organelle;GO:0043229//intracellular organelle;GO:0043231//in…	GO:0003674//molecular_function;GO:0003676//nucleic acid binding;GO:0003677//DNA binding;GO:0003824//catalytic activity;GO:0005488//binding;GO:0005515//protein binding;GO:0008168//methyltransferase activity;GO:0008270//zinc ion binding;GO:0016491//oxidoreductase activity;GO:0016705//oxidoreductase activity, acting on paired donors, with incorporation or reduction of molecular oxygen;GO:0016706//ox…	GO:0002164//larval development;GO:0003002//regionalization;GO:0006139//nucleobase-containing compound metabolic process;GO:0006325//chromatin organization;GO:0006351//transcription, DNA-templated;GO:0006355//regulation of transcription, DNA-templated;GO:0006464//cellular protein modification process;GO:0006482//protein demethylation;GO:0006508//proteolysis;GO:0006511//ubiquitin-dependent protein …
LG03	12976201	12976400	*	1.23e-07	2.24e-05	-26.2881	g2521	Genebody	PCF11	PBC34320.1 Pre-mRNA cleavage complex [Apis cerana cerana]	Genetic Information Processing	Translation	ko03015//mRNA surveillance pathway	K14400	GO:0005849//mRNA cleavage factor complex	-	GO:0006369//termination of RNA polymerase II transcription;GO:0006378//mRNA polyadenylation;GO:0006379//mRNA cleavage
LG03	13277401	13277600	*	1.29e-09	3.55e-07	26.3275	g2534	Genebody	UBN1	XP_016920345.1 ubinuclein-1 isoform X1 [Apis cerana]	-	-	-	-	GO:0000775//chromosome, centromeric region;GO:0000776//kinetochore;GO:0001674//female germ cell nucleus;GO:0001940//male pronucleus;GO:0005575//cellular_component;GO:0005622//intracellular;GO:0005623//cell;GO:0005634//nucleus;GO:0005694//chromosome;GO:0032991//macromolecular complex;GO:0042585//germinal vesicle;GO:0043073//germ cell nucleus;GO:0043226//organelle;GO:0043227//membrane-bounded organ…	GO:0003674//molecular_function;GO:0003676//nucleic acid binding;GO:0003677//DNA binding;GO:0005488//binding;GO:0097159//organic cyclic compound binding;GO:1901363//heterocyclic compound binding	GO:0000003//reproduction;GO:0000280//nuclear division;GO:0006325//chromatin organization;GO:0006338//chromatin remodeling;GO:0006996//organelle organization;GO:0006997//nucleus organization;GO:0007049//cell cycle;GO:0007143//female meiotic division;GO:0007276//gamete generation;GO:0007292//female gamete generation;GO:0007338//single fertilization;GO:0008150//biological_process;GO:0009566//fertili…
LG03	13279901	13280100	*	1.26e-28	4.71e-25	30.6078	g2534	Genebody	UBN1	XP_016920345.1 ubinuclein-1 isoform X1 [Apis cerana]	-	-	-	-	GO:0000775//chromosome, centromeric region;GO:0000776//kinetochore;GO:0001674//female germ cell nucleus;GO:0001940//male pronucleus;GO:0005575//cellular_component;GO:0005622//intracellular;GO:0005623//cell;GO:0005634//nucleus;GO:0005694//chromosome;GO:0032991//macromolecular complex;GO:0042585//germinal vesicle;GO:0043073//germ cell nucleus;GO:0043226//organelle;GO:0043227//membrane-bounded organ…	GO:0003674//molecular_function;GO:0003676//nucleic acid binding;GO:0003677//DNA binding;GO:0005488//binding;GO:0097159//organic cyclic compound binding;GO:1901363//heterocyclic compound binding	GO:0000003//reproduction;GO:0000280//nuclear division;GO:0006325//chromatin organization;GO:0006338//chromatin remodeling;GO:0006996//organelle organization;GO:0006997//nucleus organization;GO:0007049//cell cycle;GO:0007143//female meiotic division;GO:0007276//gamete generation;GO:0007292//female gamete generation;GO:0007338//single fertilization;GO:0008150//biological_process;GO:0009566//fertili…
LG03	13880001	13880200	*	3.51e-25	8.38e-22	-26.0163	g2580	Genebody	--	XP_016920298.1 uncharacterized protein LOC108002863 isoform X1 [Apis cerana]	-	-	-	-	-	-	-
LG03	14588201	14588400	*	3.4e-11	1.26e-08	-30.5131	g2623	Genebody	ATP10D	PBC34235.1 phospholipid-transporting ATPase VD [Apis cerana cerana]	-	-	-	-	GO:0005575//cellular_component;GO:0005623//cell;GO:0005886//plasma membrane;GO:0016020//membrane;GO:0016021//integral component of membrane;GO:0031004//potassium ion-transporting ATPase complex;GO:0031224//intrinsic component of membrane;GO:0044425//membrane part;GO:0044464//cell part;GO:0071944//cell periphery	GO:0000166//nucleotide binding;GO:0000287//magnesium ion binding;GO:0003674//molecular_function;GO:0003824//catalytic activity;GO:0004008//copper-exporting ATPase activity;GO:0004012//phospholipid-translocating ATPase activity;GO:0004647//phosphoserine phosphatase activity;GO:0005215//transporter activity;GO:0005319//lipid transporter activity;GO:0005375//copper ion transmembrane transporter acti…	GO:0006545//glycine biosynthetic process;GO:0006564//L-serine biosynthetic process;GO:0006810//transport;GO:0006811//ion transport;GO:0006813//potassium ion transport;GO:0006816//calcium ion transport;GO:0006820//anion transport;GO:0006825//copper ion transport;GO:0006869//lipid transport;GO:0006886//intracellular protein transport;GO:0006950//response to stress;GO:0006996//organelle organization…
LG03	14610101	14610300	*	6.3e-13	3.08e-10	33.3091	g2625	Genebody	Aasdh	PBC34233.1 Acyl-CoA synthetase family member [Apis cerana cerana]	-	-	-	-	GO:0009279//cell outer membrane	GO:0000166//nucleotide binding;GO:0003674//molecular_function;GO:0003824//catalytic activity;GO:0004043//L-aminoadipate-semialdehyde dehydrogenase activity;GO:0005488//binding;GO:0005515//protein binding;GO:0005524//ATP binding;GO:0008144//drug binding;GO:0008168//methyltransferase activity;GO:0008668//(2,3-dihydroxybenzoyl)adenylate synthase activity;GO:0008756//o-succinylbenzoate-CoA ligase act…	GO:0001505//regulation of neurotransmitter levels;GO:0006082//organic acid metabolic process;GO:0006518//peptide metabolic process;GO:0006520//cellular amino acid metabolic process;GO:0006629//lipid metabolic process;GO:0006631//fatty acid metabolic process;GO:0006807//nitrogen compound metabolic process;GO:0008150//biological_process;GO:0008152//metabolic process;GO:0009058//biosynthetic process…
LG03	14664701	14664900	*	2.02e-29	8.15e-26	47.4171	g2636	Genebody	--	XP_003696891.1 uncharacterized protein LOC100864681 isoform X1 [Apis florea]	-	-	-	-	-	-	-
LG03	14664801	14665000	*	8.88e-18	8.7e-15	31.3547	g2636	Genebody	--	XP_003696891.1 uncharacterized protein LOC100864681 isoform X1 [Apis florea]	-	-	-	-	-	-	-
LG03	14739101	14739300	*	3.38e-29	1.32e-25	-30.3434	g2647	Genebody	--	PBC34209.1 HIRA-interacting protein [Apis cerana cerana]	-	-	-	-	GO:0005575//cellular_component;GO:0005622//intracellular;GO:0005623//cell;GO:0005634//nucleus;GO:0005730//nucleolus;GO:0031974//membrane-enclosed lumen;GO:0031981//nuclear lumen;GO:0043226//organelle;GO:0043227//membrane-bounded organelle;GO:0043228//non-membrane-bounded organelle;GO:0043229//intracellular organelle;GO:0043231//intracellular membrane-bounded organelle;GO:0043232//intracellular no…	-	GO:0006325//chromatin organization;GO:0006333//chromatin assembly or disassembly;GO:0006996//organelle organization;GO:0008150//biological_process;GO:0009987//cellular process;GO:0016043//cellular component organization;GO:0051276//chromosome organization;GO:0071840//cellular component organization or biogenesis
LG03	14796901	14797100	*	2.68e-34	1.88e-30	45.9089	g2661	Genebody	Nrde2	PBC34195.1 hypothetical protein APICC_03127 [Apis cerana cerana]	-	-	-	-	GO:0005575//cellular_component;GO:0005622//intracellular;GO:0005623//cell;GO:0005634//nucleus;GO:0005681//spliceosomal complex;GO:0032991//macromolecular complex;GO:0043226//organelle;GO:0043227//membrane-bounded organelle;GO:0043229//intracellular organelle;GO:0043231//intracellular membrane-bounded organelle;GO:0044422//organelle part;GO:0044424//intracellular part;GO:0044428//nuclear part;GO:0…	-	GO:0000375//RNA splicing, via transesterification reactions;GO:0000377//RNA splicing, via transesterification reactions with bulged adenosine as nucleophile;GO:0000398//mRNA splicing, via spliceosome;GO:0001672//regulation of chromatin assembly or disassembly;GO:0006139//nucleobase-containing compound metabolic process;GO:0006325//chromatin organization;GO:0006342//chromatin silencing;GO:0006355/…
LG03	14797001	14797200	*	2.68e-34	1.88e-30	45.9089	g2661	Genebody	Nrde2	PBC34195.1 hypothetical protein APICC_03127 [Apis cerana cerana]	-	-	-	-	GO:0005575//cellular_component;GO:0005622//intracellular;GO:0005623//cell;GO:0005634//nucleus;GO:0005681//spliceosomal complex;GO:0032991//macromolecular complex;GO:0043226//organelle;GO:0043227//membrane-bounded organelle;GO:0043229//intracellular organelle;GO:0043231//intracellular membrane-bounded organelle;GO:0044422//organelle part;GO:0044424//intracellular part;GO:0044428//nuclear part;GO:0…	-	GO:0000375//RNA splicing, via transesterification reactions;GO:0000377//RNA splicing, via transesterification reactions with bulged adenosine as nucleophile;GO:0000398//mRNA splicing, via spliceosome;GO:0001672//regulation of chromatin assembly or disassembly;GO:0006139//nucleobase-containing compound metabolic process;GO:0006325//chromatin organization;GO:0006342//chromatin silencing;GO:0006355/…
LG03	14980401	14980600	*	3.86e-15	2.63e-12	31.3582	g2670	Genebody	Rasa1	XP_012346509.1 ras GTPase-activating protein 1 [Apis florea]	Environmental Information Processing;Environmental Information Processing;Environmental Information Processing;Organismal Systems	Signal transduction;Signal transduction;Signal transduction;Development	ko04010//MAPK signaling pathway;ko04013//MAPK signaling pathway - fly;ko04014//Ras signaling pathway;ko04360//Axon guidance	K04352;K04352;K04352;K04352	GO:0001726//ruffle;GO:0005575//cellular_component;GO:0005622//intracellular;GO:0005623//cell;GO:0005634//nucleus;GO:0005635//nuclear envelope;GO:0005737//cytoplasm;GO:0005829//cytosol;GO:0005886//plasma membrane;GO:0009898//cytoplasmic side of plasma membrane;GO:0012505//endomembrane system;GO:0016020//membrane;GO:0031090//organelle membrane;GO:0031224//intrinsic component of membrane;GO:0031226/…	GO:0001784//phosphotyrosine binding;GO:0003674//molecular_function;GO:0003824//catalytic activity;GO:0003924//GTPase activity;GO:0004146//dihydrofolate reductase activity;GO:0005096//GTPase activator activity;GO:0005102//receptor binding;GO:0005161//platelet-derived growth factor receptor binding;GO:0005488//binding;GO:0005515//protein binding;GO:0008047//enzyme activator activity;GO:0008134//tra…	GO:0000003//reproduction;GO:0000165//MAPK cascade;GO:0000278//mitotic cell cycle;GO:0000281//mitotic cytokinesis;GO:0000910//cytokinesis;GO:0001568//blood vessel development;GO:0001570//vasculogenesis;GO:0001932//regulation of protein phosphorylation;GO:0001933//negative regulation of protein phosphorylation;GO:0001934//positive regulation of protein phosphorylation;GO:0001944//vasculature develo…
LG03	15049701	15049900	*	1.97e-17	1.85e-14	-36.7091	g2674	Genebody	Ero1L	XP_016920040.1 ero1-like protein [Apis cerana]	Genetic Information Processing;Human Diseases	Folding, sorting and degradation;Infectious diseases	ko04141//Protein processing in endoplasmic reticulum;ko05110//Vibrio cholerae infection	K10950;K10950	GO:0005575//cellular_component;GO:0005622//intracellular;GO:0005623//cell;GO:0005737//cytoplasm;GO:0005783//endoplasmic reticulum;GO:0005789//endoplasmic reticulum membrane;GO:0012505//endomembrane system;GO:0016020//membrane;GO:0031984//organelle subcompartment;GO:0042175//nuclear outer membrane-endoplasmic reticulum membrane network;GO:0043226//organelle;GO:0043227//membrane-bounded organelle;G…	GO:0003674//molecular_function;GO:0003756//protein disulfide isomerase activity;GO:0003824//catalytic activity;GO:0015035//protein disulfide oxidoreductase activity;GO:0015036//disulfide oxidoreductase activity;GO:0016491//oxidoreductase activity;GO:0016667//oxidoreductase activity, acting on a sulfur group of donors;GO:0016670//oxidoreductase activity, acting on a sulfur group of donors, oxygen …	GO:0006457//protein folding;GO:0006458//'de novo' protein folding;GO:0006464//cellular protein modification process;GO:0006807//nitrogen compound metabolic process;GO:0006950//response to stress;GO:0008150//biological_process;GO:0008152//metabolic process;GO:0008593//regulation of Notch signaling pathway;GO:0009966//regulation of signal transduction;GO:0009987//cellular process;GO:0010467//gene e…
LG03	15049801	15050000	*	1.59e-32	9.26e-29	-38.0242	g2674	Genebody	Ero1L	XP_016920040.1 ero1-like protein [Apis cerana]	Genetic Information Processing;Human Diseases	Folding, sorting and degradation;Infectious diseases	ko04141//Protein processing in endoplasmic reticulum;ko05110//Vibrio cholerae infection	K10950;K10950	GO:0005575//cellular_component;GO:0005622//intracellular;GO:0005623//cell;GO:0005737//cytoplasm;GO:0005783//endoplasmic reticulum;GO:0005789//endoplasmic reticulum membrane;GO:0012505//endomembrane system;GO:0016020//membrane;GO:0031984//organelle subcompartment;GO:0042175//nuclear outer membrane-endoplasmic reticulum membrane network;GO:0043226//organelle;GO:0043227//membrane-bounded organelle;G…	GO:0003674//molecular_function;GO:0003756//protein disulfide isomerase activity;GO:0003824//catalytic activity;GO:0015035//protein disulfide oxidoreductase activity;GO:0015036//disulfide oxidoreductase activity;GO:0016491//oxidoreductase activity;GO:0016667//oxidoreductase activity, acting on a sulfur group of donors;GO:0016670//oxidoreductase activity, acting on a sulfur group of donors, oxygen …	GO:0006457//protein folding;GO:0006458//'de novo' protein folding;GO:0006464//cellular protein modification process;GO:0006807//nitrogen compound metabolic process;GO:0006950//response to stress;GO:0008150//biological_process;GO:0008152//metabolic process;GO:0008593//regulation of Notch signaling pathway;GO:0009966//regulation of signal transduction;GO:0009987//cellular process;GO:0010467//gene e…
LG03	15075801	15076000	*	3.14e-13	1.61e-10	-27.0135	g2679	Genebody	Zmym3	PBC27204.1 Zinc finger MYM-type protein [Apis cerana cerana]	-	-	-	-	GO:0000781//chromosome, telomeric region;GO:0000785//chromatin;GO:0000791//euchromatin;GO:0000792//heterochromatin;GO:0005575//cellular_component;GO:0005622//intracellular;GO:0005623//cell;GO:0005634//nucleus;GO:0005654//nucleoplasm;GO:0005694//chromosome;GO:0005700//polytene chromosome;GO:0005705//polytene chromosome interband;GO:0005737//cytoplasm;GO:0031974//membrane-enclosed lumen;GO:0031981/…	GO:0000981//RNA polymerase II transcription factor activity, sequence-specific DNA binding;GO:0003674//molecular_function;GO:0003676//nucleic acid binding;GO:0003677//DNA binding;GO:0003700//transcription factor activity, sequence-specific DNA binding;GO:0005488//binding;GO:0005515//protein binding;GO:0008270//zinc ion binding;GO:0043167//ion binding;GO:0043169//cation binding;GO:0046872//metal i…	GO:0000723//telomere maintenance;GO:0002165//instar larval or pupal development;GO:0006066//alcohol metabolic process;GO:0006139//nucleobase-containing compound metabolic process;GO:0006259//DNA metabolic process;GO:0006355//regulation of transcription, DNA-templated;GO:0006357//regulation of transcription from RNA polymerase II promoter;GO:0006629//lipid metabolic process;GO:0006694//steroid bio…
LG03	15075901	15076100	*	9.66e-08	1.81e-05	-26.6421	g2679	Genebody	Zmym3	PBC27204.1 Zinc finger MYM-type protein [Apis cerana cerana]	-	-	-	-	GO:0000781//chromosome, telomeric region;GO:0000785//chromatin;GO:0000791//euchromatin;GO:0000792//heterochromatin;GO:0005575//cellular_component;GO:0005622//intracellular;GO:0005623//cell;GO:0005634//nucleus;GO:0005654//nucleoplasm;GO:0005694//chromosome;GO:0005700//polytene chromosome;GO:0005705//polytene chromosome interband;GO:0005737//cytoplasm;GO:0031974//membrane-enclosed lumen;GO:0031981/…	GO:0000981//RNA polymerase II transcription factor activity, sequence-specific DNA binding;GO:0003674//molecular_function;GO:0003676//nucleic acid binding;GO:0003677//DNA binding;GO:0003700//transcription factor activity, sequence-specific DNA binding;GO:0005488//binding;GO:0005515//protein binding;GO:0008270//zinc ion binding;GO:0043167//ion binding;GO:0043169//cation binding;GO:0046872//metal i…	GO:0000723//telomere maintenance;GO:0002165//instar larval or pupal development;GO:0006066//alcohol metabolic process;GO:0006139//nucleobase-containing compound metabolic process;GO:0006259//DNA metabolic process;GO:0006355//regulation of transcription, DNA-templated;GO:0006357//regulation of transcription from RNA polymerase II promoter;GO:0006629//lipid metabolic process;GO:0006694//steroid bio…
LG03	15082701	15082900	*	1.27e-27	4.26e-24	-38.4917	g2680	Genebody	mkrn1	XP_003696935.1 probable E3 ubiquitin-protein ligase makorin-1 isoform X1 [Apis florea]	-	-	-	-	GO:0005575//cellular_component;GO:0005622//intracellular;GO:0005623//cell;GO:0005737//cytoplasm;GO:0005829//cytosol;GO:0044424//intracellular part;GO:0044444//cytoplasmic part;GO:0044464//cell part	GO:0003674//molecular_function;GO:0003676//nucleic acid binding;GO:0003677//DNA binding;GO:0003682//chromatin binding;GO:0003824//catalytic activity;GO:0004842//ubiquitin-protein transferase activity;GO:0005488//binding;GO:0008270//zinc ion binding;GO:0016740//transferase activity;GO:0019787//ubiquitin-like protein transferase activity;GO:0043167//ion binding;GO:0043169//cation binding;GO:0046872…	GO:0000209//protein polyubiquitination;GO:0006464//cellular protein modification process;GO:0006807//nitrogen compound metabolic process;GO:0008150//biological_process;GO:0008152//metabolic process;GO:0009987//cellular process;GO:0010033//response to organic substance;GO:0016567//protein ubiquitination;GO:0019538//protein metabolic process;GO:0032446//protein modification by small protein conjuga…
LG03	15082801	15083000	*	9.11e-50	2.67e-45	-50.2236	g2680	Genebody	mkrn1	XP_003696935.1 probable E3 ubiquitin-protein ligase makorin-1 isoform X1 [Apis florea]	-	-	-	-	GO:0005575//cellular_component;GO:0005622//intracellular;GO:0005623//cell;GO:0005737//cytoplasm;GO:0005829//cytosol;GO:0044424//intracellular part;GO:0044444//cytoplasmic part;GO:0044464//cell part	GO:0003674//molecular_function;GO:0003676//nucleic acid binding;GO:0003677//DNA binding;GO:0003682//chromatin binding;GO:0003824//catalytic activity;GO:0004842//ubiquitin-protein transferase activity;GO:0005488//binding;GO:0008270//zinc ion binding;GO:0016740//transferase activity;GO:0019787//ubiquitin-like protein transferase activity;GO:0043167//ion binding;GO:0043169//cation binding;GO:0046872…	GO:0000209//protein polyubiquitination;GO:0006464//cellular protein modification process;GO:0006807//nitrogen compound metabolic process;GO:0008150//biological_process;GO:0008152//metabolic process;GO:0009987//cellular process;GO:0010033//response to organic substance;GO:0016567//protein ubiquitination;GO:0019538//protein metabolic process;GO:0032446//protein modification by small protein conjuga…
LG03	15191501	15191700	*	8.84e-38	8.54e-34	30.7837	g2693	Genebody	--	PBC27194.1 Rab11 family-interacting protein [Apis cerana cerana]	Cellular Processes	Transport and catabolism	ko04144//Endocytosis	K12484	GO:0005575//cellular_component;GO:0005622//intracellular;GO:0005623//cell;GO:0005634//nucleus;GO:0005654//nucleoplasm;GO:0005737//cytoplasm;GO:0005768//endosome;GO:0005886//plasma membrane;GO:0010008//endosome membrane;GO:0012505//endomembrane system;GO:0012506//vesicle membrane;GO:0016020//membrane;GO:0030659//cytoplasmic vesicle membrane;GO:0031090//organelle membrane;GO:0031410//cytoplasmic ve…	GO:0003674//molecular_function;GO:0005488//binding;GO:0005515//protein binding;GO:0017016//Ras GTPase binding;GO:0017137//Rab GTPase binding;GO:0019899//enzyme binding;GO:0019900//kinase binding;GO:0019901//protein kinase binding;GO:0031267//small GTPase binding;GO:0042802//identical protein binding;GO:0042803//protein homodimerization activity;GO:0046983//protein dimerization activity;GO:0051020…	GO:0001678//cellular glucose homeostasis;GO:0002790//peptide secretion;GO:0003008//system process;GO:0003014//renal system process;GO:0003091//renal water homeostasis;GO:0006810//transport;GO:0006887//exocytosis;GO:0007154//cell communication;GO:0007163//establishment or maintenance of cell polarity;GO:0007267//cell-cell signaling;GO:0008104//protein localization;GO:0008150//biological_process;GO…
LG03	15284301	15284500	*	1.78e-10	5.77e-08	-26.2237	g2697	Genebody	UBXN7	PBC27189.1 UBX domain-containing protein [Apis cerana cerana]	-	-	-	-	GO:0005575//cellular_component;GO:0005622//intracellular;GO:0005623//cell;GO:0005634//nucleus;GO:0005654//nucleoplasm;GO:0005737//cytoplasm;GO:0005783//endoplasmic reticulum;GO:0005789//endoplasmic reticulum membrane;GO:0005829//cytosol;GO:0012505//endomembrane system;GO:0016020//membrane;GO:0016604//nuclear body;GO:0031974//membrane-enclosed lumen;GO:0031981//nuclear lumen;GO:0031984//organelle …	GO:0003674//molecular_function;GO:0005488//binding;GO:0005515//protein binding;GO:0008134//transcription factor binding;GO:0019899//enzyme binding;GO:0031625//ubiquitin protein ligase binding;GO:0032182//ubiquitin-like protein binding;GO:0043130//ubiquitin binding;GO:0044389//ubiquitin-like protein ligase binding	GO:0006464//cellular protein modification process;GO:0006508//proteolysis;GO:0006511//ubiquitin-dependent protein catabolic process;GO:0006807//nitrogen compound metabolic process;GO:0008150//biological_process;GO:0008152//metabolic process;GO:0009056//catabolic process;GO:0009057//macromolecule catabolic process;GO:0009987//cellular process;GO:0010498//proteasomal protein catabolic process;GO:00…
LG03	15375601	15375800	*	4.96e-24	1.05e-20	-26.3942	g2707	Genebody	Lrig1	XP_016903827.1 leucine-rich repeats and immunoglobulin-like domains protein 3 [Apis cerana]	-	-	-	-	GO:0005575//cellular_component;GO:0005622//intracellular;GO:0005623//cell;GO:0005737//cytoplasm;GO:0005886//plasma membrane;GO:0005887//integral component of plasma membrane;GO:0012506//vesicle membrane;GO:0016020//membrane;GO:0016021//integral component of membrane;GO:0030659//cytoplasmic vesicle membrane;GO:0031090//organelle membrane;GO:0031224//intrinsic component of membrane;GO:0031225//anch…	GO:0003674//molecular_function;GO:0005102//receptor binding;GO:0005114//type II transforming growth factor beta receptor binding;GO:0005126//cytokine receptor binding;GO:0005160//transforming growth factor beta receptor binding;GO:0005488//binding;GO:0005515//protein binding;GO:0034713//type I transforming growth factor beta receptor binding	GO:0007154//cell communication;GO:0007165//signal transduction;GO:0007166//cell surface receptor signaling pathway;GO:0007167//enzyme linked receptor protein signaling pathway;GO:0007178//transmembrane receptor protein serine/threonine kinase signaling pathway;GO:0007179//transforming growth factor beta receptor signaling pathway;GO:0008150//biological_process;GO:0009719//response to endogenous s…
LG03	15375701	15375900	*	9.11e-20	1.16e-16	-33.0056	g2707	Genebody	Lrig1	XP_016903827.1 leucine-rich repeats and immunoglobulin-like domains protein 3 [Apis cerana]	-	-	-	-	GO:0005575//cellular_component;GO:0005622//intracellular;GO:0005623//cell;GO:0005737//cytoplasm;GO:0005886//plasma membrane;GO:0005887//integral component of plasma membrane;GO:0012506//vesicle membrane;GO:0016020//membrane;GO:0016021//integral component of membrane;GO:0030659//cytoplasmic vesicle membrane;GO:0031090//organelle membrane;GO:0031224//intrinsic component of membrane;GO:0031225//anch…	GO:0003674//molecular_function;GO:0005102//receptor binding;GO:0005114//type II transforming growth factor beta receptor binding;GO:0005126//cytokine receptor binding;GO:0005160//transforming growth factor beta receptor binding;GO:0005488//binding;GO:0005515//protein binding;GO:0034713//type I transforming growth factor beta receptor binding	GO:0007154//cell communication;GO:0007165//signal transduction;GO:0007166//cell surface receptor signaling pathway;GO:0007167//enzyme linked receptor protein signaling pathway;GO:0007178//transmembrane receptor protein serine/threonine kinase signaling pathway;GO:0007179//transforming growth factor beta receptor signaling pathway;GO:0008150//biological_process;GO:0009719//response to endogenous s…
LG03	15407601	15407800	*	3.6e-21	5.57e-18	-33.2584	g2711	Genebody	ttc39b	PBC27177.1 Tetratricopeptide repeat9B [Apis cerana cerana]	-	-	-	-	GO:0005575//cellular_component;GO:0045203//integral component of cell outer membrane	GO:0003674//molecular_function;GO:0005215//transporter activity;GO:0005515//protein binding	GO:0015774//polysaccharide transport;GO:0042710//biofilm formation
LG03	15407701	15407900	*	1.23e-34	8.93e-31	-35.2871	g2711	Genebody	ttc39b	PBC27177.1 Tetratricopeptide repeat9B [Apis cerana cerana]	-	-	-	-	GO:0005575//cellular_component;GO:0045203//integral component of cell outer membrane	GO:0003674//molecular_function;GO:0005215//transporter activity;GO:0005515//protein binding	GO:0015774//polysaccharide transport;GO:0042710//biofilm formation
LG03	15445101	15445300	*	4.28e-12	1.83e-09	25.078	g2714	Genebody	Borcs6	XP_016903822.1 BLOC-1-related complex subunit 6 isoform X1 [Apis cerana]	-	-	-	-	GO:0000323//lytic vacuole;GO:0005575//cellular_component;GO:0005622//intracellular;GO:0005623//cell;GO:0005737//cytoplasm;GO:0005764//lysosome;GO:0005765//lysosomal membrane;GO:0005773//vacuole;GO:0005774//vacuolar membrane;GO:0005829//cytosol;GO:0005869//dynactin complex;GO:0016020//membrane;GO:0031090//organelle membrane;GO:0032991//macromolecular complex;GO:0043226//organelle;GO:0043227//membr…	GO:0003677//DNA binding	GO:0007017//microtubule-based process;GO:0008150//biological_process;GO:0019082//viral protein processing;GO:0032418//lysosome localization;GO:0051179//localization;GO:0051640//organelle localization;GO:0051641//cellular localization
LG03	15500801	15501000	*	6.62e-21	9.89e-18	25.5283	g2723	Genebody	PDHB	PBC25522.1 Pyruvate dehydrogenase E1 component subunit beta [Apis cerana cerana]	Metabolism;Metabolism;Organismal Systems;Environmental Information Processing;Metabolism;Human Diseases;Metabolism;Metabolism	Global and overview maps;Global and overview maps;Endocrine system;Signal transduction;Carbohydrate metabolism;Cancers;Carbohydrate metabolism;Carbohydrate metabolism	ko01100//Metabolic pathways;ko01200//Carbon metabolism;ko04922//Glucagon signaling pathway;ko04066//HIF-1 signaling pathway;ko00010//Glycolysis / Gluconeogenesis;ko05230//Central carbon metabolism in cancer;ko00020//Citrate cycle (TCA cycle);ko00620//Pyruvate metabolism	K00162;K00162;K00162;K00162;K00162;K00162;K00162;K00162	GO:0005737//cytoplasm	GO:0008661//1-deoxy-D-xylulose-5-phosphate synthase activity	GO:0008615//pyridoxine biosynthetic process;GO:0009228//thiamine biosynthetic process;GO:0009240//isopentenyl diphosphate biosynthetic process
LG03	15500901	15501100	*	1.05e-18	1.17e-15	37.0786	g2723	Genebody	PDHB	PBC25522.1 Pyruvate dehydrogenase E1 component subunit beta [Apis cerana cerana]	Metabolism;Metabolism;Organismal Systems;Environmental Information Processing;Metabolism;Human Diseases;Metabolism;Metabolism	Global and overview maps;Global and overview maps;Endocrine system;Signal transduction;Carbohydrate metabolism;Cancers;Carbohydrate metabolism;Carbohydrate metabolism	ko01100//Metabolic pathways;ko01200//Carbon metabolism;ko04922//Glucagon signaling pathway;ko04066//HIF-1 signaling pathway;ko00010//Glycolysis / Gluconeogenesis;ko05230//Central carbon metabolism in cancer;ko00020//Citrate cycle (TCA cycle);ko00620//Pyruvate metabolism	K00162;K00162;K00162;K00162;K00162;K00162;K00162;K00162	GO:0005737//cytoplasm	GO:0008661//1-deoxy-D-xylulose-5-phosphate synthase activity	GO:0008615//pyridoxine biosynthetic process;GO:0009228//thiamine biosynthetic process;GO:0009240//isopentenyl diphosphate biosynthetic process
LG03	15502501	15502700	*	1.46e-14	9.19e-12	-27.8548	g2724	Genebody	FIBP	XP_016903857.1 acidic fibroblast growth factor intracellular-binding protein isoform X1 [Apis cerana]	-	-	-	-	GO:0005575//cellular_component;GO:0005622//intracellular;GO:0005623//cell;GO:0005634//nucleus;GO:0005654//nucleoplasm;GO:0005737//cytoplasm;GO:0005739//mitochondrion;GO:0012505//endomembrane system;GO:0016020//membrane;GO:0016604//nuclear body;GO:0016607//nuclear speck;GO:0031974//membrane-enclosed lumen;GO:0031981//nuclear lumen;GO:0043226//organelle;GO:0043227//membrane-bounded organelle;GO:004…	GO:0003674//molecular_function;GO:0005488//binding;GO:0005515//protein binding;GO:0017134//fibroblast growth factor binding;GO:0019838//growth factor binding	GO:0007154//cell communication;GO:0007165//signal transduction;GO:0007166//cell surface receptor signaling pathway;GO:0007167//enzyme linked receptor protein signaling pathway;GO:0007169//transmembrane receptor protein tyrosine kinase signaling pathway;GO:0008150//biological_process;GO:0008543//fibroblast growth factor receptor signaling pathway;GO:0009719//response to endogenous stimulus;GO:0009…
LG03	15562901	15563100	*	1.21e-14	7.69e-12	-25.7067	g2733	Genebody	FGD4	PBC25511.1 FYVE, RhoGEF and PH domain-containing protein [Apis cerana cerana]	-	-	-	-	GO:0005575//cellular_component;GO:0005622//intracellular;GO:0005623//cell;GO:0005737//cytoplasm;GO:0005856//cytoskeleton;GO:0005938//cell cortex;GO:0015629//actin cytoskeleton;GO:0042995//cell projection;GO:0043226//organelle;GO:0043228//non-membrane-bounded organelle;GO:0043229//intracellular organelle;GO:0043232//intracellular non-membrane-bounded organelle;GO:0044297//cell body;GO:0044424//int…	GO:0003674//molecular_function;GO:0005085//guanyl-nucleotide exchange factor activity;GO:0005088//Ras guanyl-nucleotide exchange factor activity;GO:0005089//Rho guanyl-nucleotide exchange factor activity;GO:0005488//binding;GO:0005515//protein binding;GO:0017016//Ras GTPase binding;GO:0017048//Rho GTPase binding;GO:0019899//enzyme binding;GO:0030269//tetrahydromethanopterin S-methyltransferase ac…	GO:0000902//cell morphogenesis;GO:0002064//epithelial cell development;GO:0008150//biological_process;GO:0009653//anatomical structure morphogenesis;GO:0009888//tissue development;GO:0009966//regulation of signal transduction;GO:0009987//cellular process;GO:0010646//regulation of cell communication;GO:0015948//methanogenesis;GO:0016043//cellular component organization;GO:0023051//regulation of si…
LG04	33401	33600	*	5.72e-18	5.76e-15	25.1248	g2742	Genebody	DRG2	XP_003698168.1 developmentally-regulated GTP-binding protein 2 [Apis florea]	-	-	-	-	GO:0005575//cellular_component;GO:0005622//intracellular;GO:0005623//cell;GO:0005634//nucleus;GO:0005654//nucleoplasm;GO:0005737//cytoplasm;GO:0005829//cytosol;GO:0031410//cytoplasmic vesicle;GO:0031974//membrane-enclosed lumen;GO:0031981//nuclear lumen;GO:0031982//vesicle;GO:0043226//organelle;GO:0043227//membrane-bounded organelle;GO:0043229//intracellular organelle;GO:0043231//intracellular me…	GO:0000166//nucleotide binding;GO:0001882//nucleoside binding;GO:0001883//purine nucleoside binding;GO:0003674//molecular_function;GO:0003824//catalytic activity;GO:0003924//GTPase activity;GO:0005488//binding;GO:0005515//protein binding;GO:0005525//GTP binding;GO:0005543//phospholipid binding;GO:0008289//lipid binding;GO:0015639//ferrous iron uptake transmembrane transporter activity;GO:0016462/…	GO:0002181//cytoplasmic translation;GO:0006400//tRNA modification;GO:0006412//translation;GO:0006518//peptide metabolic process;GO:0006807//nitrogen compound metabolic process;GO:0007154//cell communication;GO:0007165//signal transduction;GO:0008150//biological_process;GO:0008152//metabolic process;GO:0009058//biosynthetic process;GO:0009059//macromolecule biosynthetic process;GO:0009987//cellula…
LG04	33501	33700	*	9.18e-13	4.36e-10	25.3634	g2742	Genebody	DRG2	XP_003698168.1 developmentally-regulated GTP-binding protein 2 [Apis florea]	-	-	-	-	GO:0005575//cellular_component;GO:0005622//intracellular;GO:0005623//cell;GO:0005634//nucleus;GO:0005654//nucleoplasm;GO:0005737//cytoplasm;GO:0005829//cytosol;GO:0031410//cytoplasmic vesicle;GO:0031974//membrane-enclosed lumen;GO:0031981//nuclear lumen;GO:0031982//vesicle;GO:0043226//organelle;GO:0043227//membrane-bounded organelle;GO:0043229//intracellular organelle;GO:0043231//intracellular me…	GO:0000166//nucleotide binding;GO:0001882//nucleoside binding;GO:0001883//purine nucleoside binding;GO:0003674//molecular_function;GO:0003824//catalytic activity;GO:0003924//GTPase activity;GO:0005488//binding;GO:0005515//protein binding;GO:0005525//GTP binding;GO:0005543//phospholipid binding;GO:0008289//lipid binding;GO:0015639//ferrous iron uptake transmembrane transporter activity;GO:0016462/…	GO:0002181//cytoplasmic translation;GO:0006400//tRNA modification;GO:0006412//translation;GO:0006518//peptide metabolic process;GO:0006807//nitrogen compound metabolic process;GO:0007154//cell communication;GO:0007165//signal transduction;GO:0008150//biological_process;GO:0008152//metabolic process;GO:0009058//biosynthetic process;GO:0009059//macromolecule biosynthetic process;GO:0009987//cellula…
LG04	298301	298500	*	1.08e-13	6.01e-11	27.4442	g2763	Genebody	VPS52	XP_016915847.1 vacuolar protein sorting-associated protein 52 homolog [Apis cerana]	-	-	-	-	GO:0000138//Golgi trans cisterna;GO:0000139//Golgi membrane;GO:0000145//exocyst;GO:0000938//GARP complex;GO:0005575//cellular_component;GO:0005622//intracellular;GO:0005623//cell;GO:0005737//cytoplasm;GO:0005768//endosome;GO:0005794//Golgi apparatus;GO:0005795//Golgi stack;GO:0005797//Golgi medial cisterna;GO:0005802//trans-Golgi network;GO:0005829//cytosol;GO:0005856//cytoskeleton;GO:0010008//en…	GO:0000149//SNARE binding;GO:0003674//molecular_function;GO:0005488//binding;GO:0005515//protein binding;GO:0017016//Ras GTPase binding;GO:0017137//Rab GTPase binding;GO:0019899//enzyme binding;GO:0019905//syntaxin binding;GO:0031267//small GTPase binding;GO:0051020//GTPase binding	GO:0006810//transport;GO:0006886//intracellular protein transport;GO:0006887//exocytosis;GO:0006892//post-Golgi vesicle-mediated transport;GO:0006896//Golgi to vacuole transport;GO:0007034//vacuolar transport;GO:0007041//lysosomal transport;GO:0007275//multicellular organism development;GO:0007398//ectoderm development;GO:0007439//ectodermal digestive tract development;GO:0008104//protein localiz…
LG04	490701	490900	*	4.39e-12	1.87e-09	25.8548	g2774	Genebody	RPTOR	PBC25421.1 Regulatory-associated protein of mTOR [Apis cerana cerana]	Organismal Systems;Human Diseases;Environmental Information Processing;Cellular Processes;Environmental Information Processing;Organismal Systems;Human Diseases;Environmental Information Processing;Organismal Systems;Organismal Systems;Cellular Processes	Environmental adaptation;Infectious diseases;Signal transduction;Transport and catabolism;Signal transduction;Endocrine system;Cancers;Signal transduction;Aging;Aging;Transport and catabolism	ko04714//Thermogenesis;ko05131//Shigellosis;ko04151//PI3K-Akt signaling pathway;ko04140//Autophagy - animal;ko04150//mTOR signaling pathway;ko04910//Insulin signaling pathway;ko05206//MicroRNAs in cancer;ko04152//AMPK signaling pathway;ko04213//Longevity regulating pathway - multiple species;ko04211//Longevity regulating pathway - mammal;ko04136//Autophagy - other eukaryotes	K07204;K07204;K07204;K07204;K07204;K07204;K07204;K07204;K07204;K07204;K07204	-	GO:0005515//protein binding	-
LG04	490801	491000	*	2.78e-17	2.56e-14	32.9662	g2774	Genebody	RPTOR	PBC25421.1 Regulatory-associated protein of mTOR [Apis cerana cerana]	Organismal Systems;Human Diseases;Environmental Information Processing;Cellular Processes;Environmental Information Processing;Organismal Systems;Human Diseases;Environmental Information Processing;Organismal Systems;Organismal Systems;Cellular Processes	Environmental adaptation;Infectious diseases;Signal transduction;Transport and catabolism;Signal transduction;Endocrine system;Cancers;Signal transduction;Aging;Aging;Transport and catabolism	ko04714//Thermogenesis;ko05131//Shigellosis;ko04151//PI3K-Akt signaling pathway;ko04140//Autophagy - animal;ko04150//mTOR signaling pathway;ko04910//Insulin signaling pathway;ko05206//MicroRNAs in cancer;ko04152//AMPK signaling pathway;ko04213//Longevity regulating pathway - multiple species;ko04211//Longevity regulating pathway - mammal;ko04136//Autophagy - other eukaryotes	K07204;K07204;K07204;K07204;K07204;K07204;K07204;K07204;K07204;K07204;K07204	-	GO:0005515//protein binding	-
LG04	556801	557000	*	3.37e-17	3.07e-14	-28.2956	g2781	Genebody	RBBP6	XP_031775487.1 LOW QUALITY PROTEIN: E3 ubiquitin-protein ligase RBBP6 [Apis florea]	-	-	-	-	GO:0000151//ubiquitin ligase complex;GO:0000152//nuclear ubiquitin ligase complex;GO:0000228//nuclear chromosome;GO:0000785//chromatin;GO:0000790//nuclear chromatin;GO:0000791//euchromatin;GO:0000792//heterochromatin;GO:0000803//sex chromosome;GO:0001739//sex chromatin;GO:0005575//cellular_component;GO:0005622//intracellular;GO:0005623//cell;GO:0005634//nucleus;GO:0005654//nucleoplasm;GO:0005694/…	GO:0003674//molecular_function;GO:0003676//nucleic acid binding;GO:0003682//chromatin binding;GO:0003723//RNA binding;GO:0003824//catalytic activity;GO:0004842//ubiquitin-protein transferase activity;GO:0005488//binding;GO:0005515//protein binding;GO:0008270//zinc ion binding;GO:0016740//transferase activity;GO:0019787//ubiquitin-like protein transferase activity;GO:0019899//enzyme binding;GO:001…	GO:0000003//reproduction;GO:0000122//negative regulation of transcription from RNA polymerase II promoter;GO:0000209//protein polyubiquitination;GO:0000278//mitotic cell cycle;GO:0001654//eye development;GO:0001701//in utero embryonic development;GO:0001702//gastrulation with mouth forming second;GO:0001745//compound eye morphogenesis;GO:0003002//regionalization;GO:0003006//developmental process …
LG04	556901	557100	*	1.61e-18	1.74e-15	-25.732	g2781	Genebody	RBBP6	XP_031775487.1 LOW QUALITY PROTEIN: E3 ubiquitin-protein ligase RBBP6 [Apis florea]	-	-	-	-	GO:0000151//ubiquitin ligase complex;GO:0000152//nuclear ubiquitin ligase complex;GO:0000228//nuclear chromosome;GO:0000785//chromatin;GO:0000790//nuclear chromatin;GO:0000791//euchromatin;GO:0000792//heterochromatin;GO:0000803//sex chromosome;GO:0001739//sex chromatin;GO:0005575//cellular_component;GO:0005622//intracellular;GO:0005623//cell;GO:0005634//nucleus;GO:0005654//nucleoplasm;GO:0005694/…	GO:0003674//molecular_function;GO:0003676//nucleic acid binding;GO:0003682//chromatin binding;GO:0003723//RNA binding;GO:0003824//catalytic activity;GO:0004842//ubiquitin-protein transferase activity;GO:0005488//binding;GO:0005515//protein binding;GO:0008270//zinc ion binding;GO:0016740//transferase activity;GO:0019787//ubiquitin-like protein transferase activity;GO:0019899//enzyme binding;GO:001…	GO:0000003//reproduction;GO:0000122//negative regulation of transcription from RNA polymerase II promoter;GO:0000209//protein polyubiquitination;GO:0000278//mitotic cell cycle;GO:0001654//eye development;GO:0001701//in utero embryonic development;GO:0001702//gastrulation with mouth forming second;GO:0001745//compound eye morphogenesis;GO:0003002//regionalization;GO:0003006//developmental process …
LG04	628701	628900	*	8.83e-12	3.58e-09	-31.3245	g2789	Genebody	--	PBC25170.1 hypothetical protein APICC_05011 [Apis cerana cerana]	-	-	-	-	-	-	-
LG04	2607101	2607300	*	1.34e-51	5e-47	-45.6673	g2835	Genebody	XPR1	PBC25345.1 Xenotropic and polytropic retrovirus receptor [Apis cerana cerana]	-	-	-	-	GO:0005575//cellular_component;GO:0005622//intracellular;GO:0005623//cell;GO:0005737//cytoplasm;GO:0016020//membrane;GO:0016021//integral component of membrane;GO:0031224//intrinsic component of membrane;GO:0044424//intracellular part;GO:0044425//membrane part;GO:0044464//cell part	-	-
LG04	2607201	2607400	*	7.08e-51	2.44e-46	-59.222	g2835	Genebody	XPR1	PBC25345.1 Xenotropic and polytropic retrovirus receptor [Apis cerana cerana]	-	-	-	-	GO:0005575//cellular_component;GO:0005622//intracellular;GO:0005623//cell;GO:0005737//cytoplasm;GO:0016020//membrane;GO:0016021//integral component of membrane;GO:0031224//intrinsic component of membrane;GO:0044424//intracellular part;GO:0044425//membrane part;GO:0044464//cell part	-	-
LG04	2608301	2608500	*	1.04e-13	5.79e-11	33.6793	g2835	Genebody	XPR1	PBC25345.1 Xenotropic and polytropic retrovirus receptor [Apis cerana cerana]	-	-	-	-	GO:0005575//cellular_component;GO:0005622//intracellular;GO:0005623//cell;GO:0005737//cytoplasm;GO:0016020//membrane;GO:0016021//integral component of membrane;GO:0031224//intrinsic component of membrane;GO:0044424//intracellular part;GO:0044425//membrane part;GO:0044464//cell part	-	-
LG04	4212301	4212500	*	1.99e-11	7.6e-09	30.5143	g2858	Genebody	RECQL4	PBC30688.1 ATP-dependent DNA helicase Q4 [Apis cerana cerana]	-	-	-	-	-	GO:0003676//nucleic acid binding;GO:0003677//DNA binding;GO:0004003//ATP-dependent DNA helicase activity;GO:0004386//helicase activity;GO:0004527//exonuclease activity;GO:0005524//ATP binding;GO:0008026//ATP-dependent helicase activity;GO:0016787//hydrolase activity	GO:0006139//nucleobase-containing compound metabolic process;GO:0006268//DNA unwinding involved in DNA replication;GO:0006281//DNA repair;GO:0006310//DNA recombination
LG04	4213701	4213900	*	2.22e-14	1.36e-11	28.6966	g2858	Genebody	RECQL4	PBC30688.1 ATP-dependent DNA helicase Q4 [Apis cerana cerana]	-	-	-	-	-	GO:0003676//nucleic acid binding;GO:0003677//DNA binding;GO:0004003//ATP-dependent DNA helicase activity;GO:0004386//helicase activity;GO:0004527//exonuclease activity;GO:0005524//ATP binding;GO:0008026//ATP-dependent helicase activity;GO:0016787//hydrolase activity	GO:0006139//nucleobase-containing compound metabolic process;GO:0006268//DNA unwinding involved in DNA replication;GO:0006281//DNA repair;GO:0006310//DNA recombination
LG04	4247001	4247200	*	6.89e-06	0.000834833	25.2989	g2861	Genebody	Btbd10	XP_016911115.1 BTB/POZ domain-containing protein KCTD20 isoform X1 [Apis cerana]	-	-	-	-	GO:0005575//cellular_component	-	GO:0003008//system process;GO:0007600//sensory perception;GO:0008150//biological_process;GO:0032501//multicellular organismal process;GO:0050877//neurological system process;GO:0050954//sensory perception of mechanical stimulus;GO:0050975//sensory perception of touch;GO:0051260//protein homooligomerization
LG04	4247101	4247300	*	1.93e-16	1.58e-13	26.8608	g2861	Genebody	Btbd10	XP_016911115.1 BTB/POZ domain-containing protein KCTD20 isoform X1 [Apis cerana]	-	-	-	-	GO:0005575//cellular_component	-	GO:0003008//system process;GO:0007600//sensory perception;GO:0008150//biological_process;GO:0032501//multicellular organismal process;GO:0050877//neurological system process;GO:0050954//sensory perception of mechanical stimulus;GO:0050975//sensory perception of touch;GO:0051260//protein homooligomerization
LG04	4247201	4247400	*	8.87e-14	4.98e-11	26.3517	g2861	Genebody	Btbd10	XP_016911115.1 BTB/POZ domain-containing protein KCTD20 isoform X1 [Apis cerana]	-	-	-	-	GO:0005575//cellular_component	-	GO:0003008//system process;GO:0007600//sensory perception;GO:0008150//biological_process;GO:0032501//multicellular organismal process;GO:0050877//neurological system process;GO:0050954//sensory perception of mechanical stimulus;GO:0050975//sensory perception of touch;GO:0051260//protein homooligomerization
LG04	4268001	4268200	*	4.19e-13	2.1e-10	34.6923	g2864	Genebody	Vars1	XP_016911113.1 valine--tRNA ligase isoform X1 [Apis cerana]	Genetic Information Processing	Translation	ko00970//Aminoacyl-tRNA biosynthesis	K01873	GO:0005575//cellular_component;GO:0005622//intracellular;GO:0005623//cell;GO:0005737//cytoplasm;GO:0005739//mitochondrion;GO:0043226//organelle;GO:0043227//membrane-bounded organelle;GO:0043229//intracellular organelle;GO:0043231//intracellular membrane-bounded organelle;GO:0044424//intracellular part;GO:0044444//cytoplasmic part;GO:0044464//cell part	GO:0000166//nucleotide binding;GO:0002161//aminoacyl-tRNA editing activity;GO:0003674//molecular_function;GO:0003824//catalytic activity;GO:0004812//aminoacyl-tRNA ligase activity;GO:0004814//arginine-tRNA ligase activity;GO:0004822//isoleucine-tRNA ligase activity;GO:0004823//leucine-tRNA ligase activity;GO:0004825//methionine-tRNA ligase activity;GO:0004832//valine-tRNA ligase activity;GO:00054…	GO:0000959//mitochondrial RNA metabolic process;GO:0006082//organic acid metabolic process;GO:0006139//nucleobase-containing compound metabolic process;GO:0006399//tRNA metabolic process;GO:0006412//translation;GO:0006418//tRNA aminoacylation for protein translation;GO:0006420//arginyl-tRNA aminoacylation;GO:0006428//isoleucyl-tRNA aminoacylation;GO:0006429//leucyl-tRNA aminoacylation;GO:0006431/…
LG04	4276801	4277000	*	2.27e-27	7.35e-24	-29.3178	g2865	Genebody	PPP6R3	XP_028522207.1 serine/threonine-protein phosphatase 6 regulatory subunit 3 [Apis cerana]	-	-	-	-	-	GO:0019903//protein phosphatase binding	GO:0001932//regulation of protein phosphorylation;GO:0001933//negative regulation of protein phosphorylation;GO:0008150//biological_process;GO:0009892//negative regulation of metabolic process;GO:0009966//regulation of signal transduction;GO:0009968//negative regulation of signal transduction;GO:0010563//negative regulation of phosphorus metabolic process;GO:0010605//negative regulation of macrom…
LG04	4276901	4277100	*	1.48e-29	6.01e-26	-33.9581	g2865	Genebody	PPP6R3	XP_028522207.1 serine/threonine-protein phosphatase 6 regulatory subunit 3 [Apis cerana]	-	-	-	-	-	GO:0019903//protein phosphatase binding	GO:0001932//regulation of protein phosphorylation;GO:0001933//negative regulation of protein phosphorylation;GO:0008150//biological_process;GO:0009892//negative regulation of metabolic process;GO:0009966//regulation of signal transduction;GO:0009968//negative regulation of signal transduction;GO:0010563//negative regulation of phosphorus metabolic process;GO:0010605//negative regulation of macrom…
LG04	4475701	4475900	*	4.32e-14	2.54e-11	37.227	g2882	Genebody	Llgl1	PBC30662.1 Lethal(2) giant larvae protein [Apis cerana cerana]	Human Diseases;Cellular Processes;Environmental Information Processing;Environmental Information Processing	Infectious diseases;Cellular community - eukaryotes;Signal transduction;Signal transduction	ko05165//Human papillomavirus infection;ko04530//Tight junction;ko04390//Hippo signaling pathway;ko04391//Hippo signaling pathway -fly	K06094;K06094;K06094;K06094	GO:0005575//cellular_component;GO:0005576//extracellular region;GO:0005622//intracellular;GO:0005623//cell;GO:0005737//cytoplasm;GO:0005829//cytosol;GO:0005856//cytoskeleton;GO:0005886//plasma membrane;GO:0005911//cell-cell junction;GO:0005918//septate junction;GO:0005920//smooth septate junction;GO:0005938//cell cortex;GO:0008021//synaptic vesicle;GO:0012505//endomembrane system;GO:0016020//memb…	GO:0000149//SNARE binding;GO:0003674//molecular_function;GO:0004857//enzyme inhibitor activity;GO:0004860//protein kinase inhibitor activity;GO:0005096//GTPase activator activity;GO:0005488//binding;GO:0005515//protein binding;GO:0008047//enzyme activator activity;GO:0008092//cytoskeletal protein binding;GO:0017016//Ras GTPase binding;GO:0017022//myosin binding;GO:0017137//Rab GTPase binding;GO:0…	GO:0000003//reproduction;GO:0000132//establishment of mitotic spindle orientation;GO:0000226//microtubule cytoskeleton organization;GO:0000278//mitotic cell cycle;GO:0000578//embryonic axis specification;GO:0001505//regulation of neurotransmitter levels;GO:0001700//embryonic development via the syncytial blastoderm;GO:0001709//cell fate determination;GO:0001738//morphogenesis of a polarized epith…
LG04	5609901	5610100	*	3.07e-25	7.36e-22	28.5192	g2928	Genebody	--	PBC28912.1 hypothetical protein APICC_03522 [Apis cerana cerana]	-	-	-	-	-	-	-
LG04	5612901	5613100	*	1.43e-10	4.71e-08	-25.7138	g2929	Genebody	BRCA2	XP_016913284.2 breast cancer type 2 susceptibility protein [Apis cerana]	Human Diseases;Human Diseases;Human Diseases;Genetic Information Processing;Genetic Information Processing	Cancers;Cancers;Cancers;Replication and repair;Replication and repair	ko05200//Pathways in cancer;ko05224//Breast cancer;ko05212//Pancreatic cancer;ko03460//Fanconi anemia pathway;ko03440//Homologous recombination	K08775;K08775;K08775;K08775;K08775	GO:0000228//nuclear chromosome;GO:0000781//chromosome, telomeric region;GO:0000784//nuclear chromosome, telomeric region;GO:0000793//condensed chromosome;GO:0000794//condensed nuclear chromosome;GO:0000795//synaptonemal complex;GO:0000800//lateral element;GO:0005575//cellular_component;GO:0005622//intracellular;GO:0005623//cell;GO:0005634//nucleus;GO:0005654//nucleoplasm;GO:0005694//chromosome;GO…	GO:0002020//protease binding;GO:0003674//molecular_function;GO:0003676//nucleic acid binding;GO:0003677//DNA binding;GO:0003697//single-stranded DNA binding;GO:0003824//catalytic activity;GO:0004402//histone acetyltransferase activity;GO:0005488//binding;GO:0005515//protein binding;GO:0008022//protein C-terminus binding;GO:0008080//N-acetyltransferase activity;GO:0008092//cytoskeletal protein bin…	GO:0000003//reproduction;GO:0000075//cell cycle checkpoint;GO:0000226//microtubule cytoskeleton organization;GO:0000278//mitotic cell cycle;GO:0000280//nuclear division;GO:0000281//mitotic cytokinesis;GO:0000711//meiotic DNA repair synthesis;GO:0000722//telomere maintenance via recombination;GO:0000723//telomere maintenance;GO:0000724//double-strand break repair via homologous recombination;GO:00…
LG04	5875501	5875700	*	3.65e-23	7.02e-20	-29.7792	g2940	Genebody	K12H4.7	PBC26304.1 Putative serine protease K12H4.7 [Apis cerana cerana]	-	-	-	-	-	GO:0003674//molecular_function;GO:0003824//catalytic activity;GO:0004177//aminopeptidase activity;GO:0008233//peptidase activity;GO:0008236//serine-type peptidase activity;GO:0008238//exopeptidase activity;GO:0008239//dipeptidyl-peptidase activity;GO:0016787//hydrolase activity;GO:0017171//serine hydrolase activity;GO:0070011//peptidase activity, acting on L-amino acid peptides	GO:0006508//proteolysis;GO:0006807//nitrogen compound metabolic process;GO:0008150//biological_process;GO:0008152//metabolic process;GO:0019538//protein metabolic process;GO:0043170//macromolecule metabolic process;GO:0044238//primary metabolic process;GO:0071704//organic substance metabolic process;GO:1901564//organonitrogen compound metabolic process
LG04	6193901	6194100	*	1.61e-18	1.75e-15	28.8005	g2967	Genebody	Rich	XP_026299558.1 guanine nucleotide exchange factor subunit Rich isoform X1 [Apis mellifera]	-	-	-	-	GO:0000139//Golgi membrane;GO:0005575//cellular_component;GO:0005622//intracellular;GO:0005623//cell;GO:0005737//cytoplasm;GO:0005794//Golgi apparatus;GO:0005802//trans-Golgi network;GO:0005829//cytosol;GO:0012505//endomembrane system;GO:0016020//membrane;GO:0016021//integral component of membrane;GO:0031090//organelle membrane;GO:0031224//intrinsic component of membrane;GO:0031410//cytoplasmic v…	GO:0003674//molecular_function;GO:0005085//guanyl-nucleotide exchange factor activity;GO:0005088//Ras guanyl-nucleotide exchange factor activity;GO:0005488//binding;GO:0005515//protein binding;GO:0017016//Ras GTPase binding;GO:0017112//Rab guanyl-nucleotide exchange factor activity;GO:0017137//Rab GTPase binding;GO:0019899//enzyme binding;GO:0031267//small GTPase binding;GO:0051020//GTPase bindin…	GO:0000902//cell morphogenesis;GO:0000904//cell morphogenesis involved in differentiation;GO:0001654//eye development;GO:0001745//compound eye morphogenesis;GO:0001751//compound eye photoreceptor cell differentiation;GO:0001754//eye photoreceptor cell differentiation;GO:0006810//transport;GO:0006886//intracellular protein transport;GO:0006928//movement of cell or subcellular component;GO:0006935/…
LG04	6295001	6295200	*	1.81e-10	5.85e-08	-28.6004	g2976	Genebody	LanB2	PBC26266.1 Laminin subunit gamma-1 [Apis cerana cerana]	Human Diseases;Human Diseases;Environmental Information Processing;Cellular Processes;Human Diseases;Human Diseases;Human Diseases;Environmental Information Processing;Human Diseases	Cancers;Infectious diseases;Signal transduction;Cellular community - eukaryotes;Infectious diseases;Infectious diseases;Cancers;Signaling molecules and interaction;Neurodegenerative diseases	ko05200//Pathways in cancer;ko05165//Human papillomavirus infection;ko04151//PI3K-Akt signaling pathway;ko04510//Focal adhesion;ko05145//Toxoplasmosis;ko05146//Amoebiasis;ko05222//Small cell lung cancer;ko04512//ECM-receptor interaction;ko05020//Prion diseases	K05635;K05635;K05635;K05635;K05635;K05635;K05635;K05635;K05635	GO:0005575//cellular_component;GO:0005576//extracellular region;GO:0005604//basement membrane;GO:0005605//basal lamina;GO:0005789//endoplasmic reticulum membrane;GO:0016021//integral component of membrane;GO:0031012//extracellular matrix;GO:0042597//periplasmic space;GO:0044420//extracellular matrix component;GO:0044421//extracellular region part	GO:0005506//iron ion binding;GO:0005524//ATP binding;GO:0009055//electron carrier activity;GO:0020037//heme binding	GO:0000902//cell morphogenesis;GO:0000904//cell morphogenesis involved in differentiation;GO:0007059//chromosome segregation;GO:0007155//cell adhesion;GO:0007275//multicellular organism development;GO:0007431//salivary gland development;GO:0007435//salivary gland morphogenesis;GO:0007494//midgut development;GO:0008150//biological_process;GO:0009653//anatomical structure morphogenesis;GO:0009887//…
LG04	6315001	6315200	*	2.14e-07	3.71e-05	25.5045	g2980	Genebody	Lrsam1	PBC26262.1 E3 ubiquitin-protein ligase LRSAM1 [Apis cerana cerana]	-	-	-	-	GO:0005575//cellular_component;GO:0005622//intracellular;GO:0005623//cell;GO:0005737//cytoplasm;GO:0005829//cytosol;GO:0005886//plasma membrane;GO:0016020//membrane;GO:0044424//intracellular part;GO:0044444//cytoplasmic part;GO:0044464//cell part;GO:0071944//cell periphery	GO:0003674//molecular_function;GO:0003824//catalytic activity;GO:0004842//ubiquitin-protein transferase activity;GO:0005488//binding;GO:0005515//protein binding;GO:0016740//transferase activity;GO:0019787//ubiquitin-like protein transferase activity;GO:0043167//ion binding;GO:0043169//cation binding;GO:0046872//metal ion binding;GO:0061630//ubiquitin protein ligase activity;GO:0061659//ubiquitin-…	GO:0000209//protein polyubiquitination;GO:0002831//regulation of response to biotic stimulus;GO:0002833//positive regulation of response to biotic stimulus;GO:0006464//cellular protein modification process;GO:0006807//nitrogen compound metabolic process;GO:0006810//transport;GO:0006897//endocytosis;GO:0006914//autophagy;GO:0007154//cell communication;GO:0007165//signal transduction;GO:0008104//pr…
LG04	9190401	9190600	*	1.55e-17	1.47e-14	29.8638	g3072	Genebody	--	PBC28944.1 hypothetical protein APICC_09140 [Apis cerana cerana]	-	-	-	-	-	-	-
LG04	9190501	9190700	*	1.29e-26	3.76e-23	33.2089	g3072	Genebody	--	PBC28944.1 hypothetical protein APICC_09140 [Apis cerana cerana]	-	-	-	-	-	-	-
LG04	9196901	9197100	*	6.75e-09	1.61e-06	-26.0264	g3074	Genebody	CG13604	PBC28942.1 Ubiquitin-associated and SH3 domain-containing protein B [Apis cerana cerana]	-	-	-	-	GO:0005575//cellular_component;GO:0005622//intracellular;GO:0005623//cell;GO:0005737//cytoplasm;GO:0005829//cytosol;GO:0009379//Holliday junction helicase complex;GO:0044424//intracellular part;GO:0044444//cytoplasmic part;GO:0044464//cell part	GO:0003674//molecular_function;GO:0003824//catalytic activity;GO:0005515//protein binding;GO:0005524//ATP binding;GO:0008969//phosphohistidine phosphatase activity;GO:0009378//four-way junction helicase activity;GO:0016787//hydrolase activity;GO:0016788//hydrolase activity, acting on ester bonds;GO:0016791//phosphatase activity;GO:0042578//phosphoric ester hydrolase activity	GO:0000160//phosphorelay signal transduction system;GO:0006281//DNA repair;GO:0006310//DNA recombination;GO:0006793//phosphorus metabolic process;GO:0006796//phosphate-containing compound metabolic process;GO:0008150//biological_process;GO:0008152//metabolic process;GO:0009236//cobalamin biosynthetic process;GO:0009987//cellular process;GO:0016311//dephosphorylation;GO:0044237//cellular metabolic…
LG04	9197001	9197200	*	3.58e-11	1.32e-08	-32.0885	g3074	Genebody	CG13604	PBC28942.1 Ubiquitin-associated and SH3 domain-containing protein B [Apis cerana cerana]	-	-	-	-	GO:0005575//cellular_component;GO:0005622//intracellular;GO:0005623//cell;GO:0005737//cytoplasm;GO:0005829//cytosol;GO:0009379//Holliday junction helicase complex;GO:0044424//intracellular part;GO:0044444//cytoplasmic part;GO:0044464//cell part	GO:0003674//molecular_function;GO:0003824//catalytic activity;GO:0005515//protein binding;GO:0005524//ATP binding;GO:0008969//phosphohistidine phosphatase activity;GO:0009378//four-way junction helicase activity;GO:0016787//hydrolase activity;GO:0016788//hydrolase activity, acting on ester bonds;GO:0016791//phosphatase activity;GO:0042578//phosphoric ester hydrolase activity	GO:0000160//phosphorelay signal transduction system;GO:0006281//DNA repair;GO:0006310//DNA recombination;GO:0006793//phosphorus metabolic process;GO:0006796//phosphate-containing compound metabolic process;GO:0008150//biological_process;GO:0008152//metabolic process;GO:0009236//cobalamin biosynthetic process;GO:0009987//cellular process;GO:0016311//dephosphorylation;GO:0044237//cellular metabolic…
LG04	9340001	9340200	*	1.35e-14	8.54e-12	-29.7912	g3090	Genebody	Axn	XP_003698450.1 axin-2 isoform X1 [Apis florea]	Human Diseases;Human Diseases;Human Diseases;Human Diseases;Environmental Information Processing;Human Diseases;Environmental Information Processing;Cellular Processes;Human Diseases;Human Diseases;Human Diseases;Human Diseases;Human Diseases	Neurodegenerative diseases;Cancers;Infectious diseases;Endocrine and metabolic diseases;Signal transduction;Cancers;Signal transduction;Cellular community - eukaryotes;Cancers;Cancers;Cancers;Cancers;Cancers	ko05010//Alzheimer disease;ko05200//Pathways in cancer;ko05165//Human papillomavirus infection;ko04934//Cushing syndrome;ko04310//Wnt signaling pathway;ko05225//Hepatocellular carcinoma;ko04390//Hippo signaling pathway;ko04550//Signaling pathways regulating pluripotency of stem cells;ko05224//Breast cancer;ko05226//Gastric cancer;ko05210//Colorectal cancer;ko05213//Endometrial cancer;ko05217//Bas…	K02157;K02157;K02157;K02157;K02157;K02157;K02157;K02157;K02157;K02157;K02157;K02157;K02157	GO:0005575//cellular_component;GO:0005622//intracellular;GO:0005623//cell;GO:0005634//nucleus;GO:0005737//cytoplasm;GO:0005886//plasma membrane;GO:0016020//membrane;GO:0030877//beta-catenin destruction complex;GO:0032991//macromolecular complex;GO:0043226//organelle;GO:0043227//membrane-bounded organelle;GO:0043229//intracellular organelle;GO:0043231//intracellular membrane-bounded organelle;GO:0…	GO:0003674//molecular_function;GO:0005096//GTPase activator activity;GO:0005102//receptor binding;GO:0005198//structural molecule activity;GO:0005488//binding;GO:0005515//protein binding;GO:0008013//beta-catenin binding;GO:0008047//enzyme activator activity;GO:0019899//enzyme binding;GO:0019900//kinase binding;GO:0019901//protein kinase binding;GO:0030159//receptor signaling complex scaffold acti…	GO:0000003//reproduction;GO:0002009//morphogenesis of an epithelium;GO:0002164//larval development;GO:0002165//instar larval or pupal development;GO:0002168//instar larval development;GO:0003002//regionalization;GO:0003006//developmental process involved in reproduction;GO:0006950//response to stress;GO:0007275//multicellular organism development;GO:0007276//gamete generation;GO:0007281//germ cel…
LG04	9381701	9381900	*	4.92e-22	8.27e-19	32.8134	g3094	Genebody	Khc	PBC28924.1 Kinesin heavy chain [Apis cerana cerana]	Human Diseases;Human Diseases;Cellular Processes;Organismal Systems	Neurodegenerative diseases;Neurodegenerative diseases;Transport and catabolism;Nervous system	ko05016//Huntington disease;ko05010//Alzheimer disease;ko04144//Endocytosis;ko04728//Dopaminergic synapse	K10396;K10396;K10396;K10396	GO:0005575//cellular_component;GO:0005622//intracellular;GO:0005623//cell;GO:0005737//cytoplasm;GO:0005856//cytoskeleton;GO:0005871//kinesin complex;GO:0005874//microtubule;GO:0005875//microtubule associated complex;GO:0005881//cytoplasmic microtubule;GO:0005938//cell cortex;GO:0015629//actin cytoskeleton;GO:0015630//microtubule cytoskeleton;GO:0030424//axon;GO:0030478//actin cap;GO:0030863//cort…	GO:0000166//nucleotide binding;GO:0003674//molecular_function;GO:0003774//motor activity;GO:0003777//microtubule motor activity;GO:0003824//catalytic activity;GO:0005488//binding;GO:0005515//protein binding;GO:0005523//tropomyosin binding;GO:0005524//ATP binding;GO:0008017//microtubule binding;GO:0008092//cytoskeletal protein binding;GO:0008144//drug binding;GO:0008574//ATP-dependent microtubule …	GO:0000003//reproduction;GO:0000226//microtubule cytoskeleton organization;GO:0000301//retrograde transport, vesicle recycling within Golgi;GO:0000578//embryonic axis specification;GO:0000902//cell morphogenesis;GO:0000904//cell morphogenesis involved in differentiation;GO:0001654//eye development;GO:0001754//eye photoreceptor cell differentiation;GO:0002064//epithelial cell development;GO:000206…
LG04	9861701	9861900	*	1.95e-20	2.71e-17	-30.6371	g3111	Genebody	--	PBC29689.1 hypothetical protein APICC_03851 [Apis cerana cerana]	-	-	-	-	-	-	-
LG04	9892901	9893100	*	9.65e-21	1.4e-17	-35.0165	g3117	Genebody	Map3k9	XP_006623021.1 mitogen-activated protein kinase kinase kinase 10-like isoform X3 [Apis dorsata]	Environmental Information Processing;Organismal Systems	Signal transduction;Development and regeneration	ko04013//MAPK signaling pathway - fly;ko04361//Axon regeneration	K04417;K04417	GO:0005575//cellular_component;GO:0005622//intracellular;GO:0005623//cell;GO:0005737//cytoplasm;GO:0005938//cell cortex;GO:0044424//intracellular part;GO:0044444//cytoplasmic part;GO:0044464//cell part;GO:0071944//cell periphery;GO:0099568//cytoplasmic region	GO:0000166//nucleotide binding;GO:0003674//molecular_function;GO:0003824//catalytic activity;GO:0004521//endoribonuclease activity;GO:0004672//protein kinase activity;GO:0004674//protein serine/threonine kinase activity;GO:0004706//JUN kinase kinase kinase activity;GO:0004709//MAP kinase kinase kinase activity;GO:0005080//protein kinase C binding;GO:0005102//receptor binding;GO:0005488//binding;G…	GO:0000003//reproduction;GO:0000165//MAPK cascade;GO:0000186//activation of MAPKK activity;GO:0000187//activation of MAPK activity;GO:0000902//cell morphogenesis;GO:0001558//regulation of cell growth;GO:0001700//embryonic development via the syncytial blastoderm;GO:0001932//regulation of protein phosphorylation;GO:0001934//positive regulation of protein phosphorylation;GO:0002009//morphogenesis o…
LG04	9894201	9894400	*	2.83e-08	5.94e-06	-27.5328	g3117	Genebody	Map3k9	XP_006623021.1 mitogen-activated protein kinase kinase kinase 10-like isoform X3 [Apis dorsata]	Environmental Information Processing;Organismal Systems	Signal transduction;Development and regeneration	ko04013//MAPK signaling pathway - fly;ko04361//Axon regeneration	K04417;K04417	GO:0005575//cellular_component;GO:0005622//intracellular;GO:0005623//cell;GO:0005737//cytoplasm;GO:0005938//cell cortex;GO:0044424//intracellular part;GO:0044444//cytoplasmic part;GO:0044464//cell part;GO:0071944//cell periphery;GO:0099568//cytoplasmic region	GO:0000166//nucleotide binding;GO:0003674//molecular_function;GO:0003824//catalytic activity;GO:0004521//endoribonuclease activity;GO:0004672//protein kinase activity;GO:0004674//protein serine/threonine kinase activity;GO:0004706//JUN kinase kinase kinase activity;GO:0004709//MAP kinase kinase kinase activity;GO:0005080//protein kinase C binding;GO:0005102//receptor binding;GO:0005488//binding;G…	GO:0000003//reproduction;GO:0000165//MAPK cascade;GO:0000186//activation of MAPKK activity;GO:0000187//activation of MAPK activity;GO:0000902//cell morphogenesis;GO:0001558//regulation of cell growth;GO:0001700//embryonic development via the syncytial blastoderm;GO:0001932//regulation of protein phosphorylation;GO:0001934//positive regulation of protein phosphorylation;GO:0002009//morphogenesis o…
LG04	9894301	9894500	*	2.83e-08	5.94e-06	-27.5328	g3117	Genebody	Map3k9	XP_006623021.1 mitogen-activated protein kinase kinase kinase 10-like isoform X3 [Apis dorsata]	Environmental Information Processing;Organismal Systems	Signal transduction;Development and regeneration	ko04013//MAPK signaling pathway - fly;ko04361//Axon regeneration	K04417;K04417	GO:0005575//cellular_component;GO:0005622//intracellular;GO:0005623//cell;GO:0005737//cytoplasm;GO:0005938//cell cortex;GO:0044424//intracellular part;GO:0044444//cytoplasmic part;GO:0044464//cell part;GO:0071944//cell periphery;GO:0099568//cytoplasmic region	GO:0000166//nucleotide binding;GO:0003674//molecular_function;GO:0003824//catalytic activity;GO:0004521//endoribonuclease activity;GO:0004672//protein kinase activity;GO:0004674//protein serine/threonine kinase activity;GO:0004706//JUN kinase kinase kinase activity;GO:0004709//MAP kinase kinase kinase activity;GO:0005080//protein kinase C binding;GO:0005102//receptor binding;GO:0005488//binding;G…	GO:0000003//reproduction;GO:0000165//MAPK cascade;GO:0000186//activation of MAPKK activity;GO:0000187//activation of MAPK activity;GO:0000902//cell morphogenesis;GO:0001558//regulation of cell growth;GO:0001700//embryonic development via the syncytial blastoderm;GO:0001932//regulation of protein phosphorylation;GO:0001934//positive regulation of protein phosphorylation;GO:0002009//morphogenesis o…
LG04	9904101	9904300	*	1.3e-13	7.1e-11	31.5017	g3118	Genebody	PCNX1	PBC29678.1 Pecanex protein [Apis cerana cerana]	-	-	-	-	GO:0005575//cellular_component;GO:0005622//intracellular;GO:0005623//cell;GO:0005737//cytoplasm;GO:0005783//endoplasmic reticulum;GO:0012505//endomembrane system;GO:0016020//membrane;GO:0016021//integral component of membrane;GO:0031224//intrinsic component of membrane;GO:0043226//organelle;GO:0043227//membrane-bounded organelle;GO:0043229//intracellular organelle;GO:0043231//intracellular membra…	-	GO:0006996//organelle organization;GO:0007029//endoplasmic reticulum organization;GO:0007154//cell communication;GO:0007165//signal transduction;GO:0007166//cell surface receptor signaling pathway;GO:0007219//Notch signaling pathway;GO:0008150//biological_process;GO:0009987//cellular process;GO:0010256//endomembrane system organization;GO:0016043//cellular component organization;GO:0023052//signa…
LG04	9904201	9904400	*	1.3e-13	7.1e-11	31.5017	g3118	Genebody	PCNX1	PBC29678.1 Pecanex protein [Apis cerana cerana]	-	-	-	-	GO:0005575//cellular_component;GO:0005622//intracellular;GO:0005623//cell;GO:0005737//cytoplasm;GO:0005783//endoplasmic reticulum;GO:0012505//endomembrane system;GO:0016020//membrane;GO:0016021//integral component of membrane;GO:0031224//intrinsic component of membrane;GO:0043226//organelle;GO:0043227//membrane-bounded organelle;GO:0043229//intracellular organelle;GO:0043231//intracellular membra…	-	GO:0006996//organelle organization;GO:0007029//endoplasmic reticulum organization;GO:0007154//cell communication;GO:0007165//signal transduction;GO:0007166//cell surface receptor signaling pathway;GO:0007219//Notch signaling pathway;GO:0008150//biological_process;GO:0009987//cellular process;GO:0010256//endomembrane system organization;GO:0016043//cellular component organization;GO:0023052//signa…
LG04	9956201	9956400	*	1.74e-59	1.39e-54	-67.721	g3125	Genebody	Rm62	XP_028522450.1 ATP-dependent RNA helicase p62 isoform X1 [Apis cerana]	Genetic Information Processing;Human Diseases;Human Diseases	Transcription;Cancers;Cancers	ko03040//Spliceosome;ko05205//Proteoglycans in cancer;ko05202//Transcriptional misregulation in cancers	K12823;K12823;K12823	GO:0005575//cellular_component;GO:0005622//intracellular;GO:0005623//cell;GO:0005634//nucleus;GO:0005658//alpha DNA polymerase:primase complex;GO:0005694//chromosome;GO:0005700//polytene chromosome;GO:0005703//polytene chromosome puff;GO:0005730//nucleolus;GO:0009380//excinuclease repair complex;GO:0031974//membrane-enclosed lumen;GO:0031981//nuclear lumen;GO:0043226//organelle;GO:0043227//membra…	GO:0000166//nucleotide binding;GO:0003674//molecular_function;GO:0003676//nucleic acid binding;GO:0003677//DNA binding;GO:0003688//DNA replication origin binding;GO:0003690//double-stranded DNA binding;GO:0003723//RNA binding;GO:0003724//RNA helicase activity;GO:0003729//mRNA binding;GO:0003824//catalytic activity;GO:0004003//ATP-dependent DNA helicase activity;GO:0004004//ATP-dependent RNA helic…	GO:0000375//RNA splicing, via transesterification reactions;GO:0000377//RNA splicing, via transesterification reactions with bulged adenosine as nucleophile;GO:0000398//mRNA splicing, via spliceosome;GO:0002376//immune system process;GO:0002682//regulation of immune system process;GO:0002697//regulation of immune effector process;GO:0002831//regulation of response to biotic stimulus;GO:0006139//n…
LG04	9956301	9956500	*	1.87e-96	3.3e-90	-47.8339	g3125	Genebody	Rm62	XP_028522450.1 ATP-dependent RNA helicase p62 isoform X1 [Apis cerana]	Genetic Information Processing;Human Diseases;Human Diseases	Transcription;Cancers;Cancers	ko03040//Spliceosome;ko05205//Proteoglycans in cancer;ko05202//Transcriptional misregulation in cancers	K12823;K12823;K12823	GO:0005575//cellular_component;GO:0005622//intracellular;GO:0005623//cell;GO:0005634//nucleus;GO:0005658//alpha DNA polymerase:primase complex;GO:0005694//chromosome;GO:0005700//polytene chromosome;GO:0005703//polytene chromosome puff;GO:0005730//nucleolus;GO:0009380//excinuclease repair complex;GO:0031974//membrane-enclosed lumen;GO:0031981//nuclear lumen;GO:0043226//organelle;GO:0043227//membra…	GO:0000166//nucleotide binding;GO:0003674//molecular_function;GO:0003676//nucleic acid binding;GO:0003677//DNA binding;GO:0003688//DNA replication origin binding;GO:0003690//double-stranded DNA binding;GO:0003723//RNA binding;GO:0003724//RNA helicase activity;GO:0003729//mRNA binding;GO:0003824//catalytic activity;GO:0004003//ATP-dependent DNA helicase activity;GO:0004004//ATP-dependent RNA helic…	GO:0000375//RNA splicing, via transesterification reactions;GO:0000377//RNA splicing, via transesterification reactions with bulged adenosine as nucleophile;GO:0000398//mRNA splicing, via spliceosome;GO:0002376//immune system process;GO:0002682//regulation of immune system process;GO:0002697//regulation of immune effector process;GO:0002831//regulation of response to biotic stimulus;GO:0006139//n…
LG04	9956401	9956600	*	3.74e-46	8.34e-42	-30.9346	g3125	Genebody	Rm62	XP_028522450.1 ATP-dependent RNA helicase p62 isoform X1 [Apis cerana]	Genetic Information Processing;Human Diseases;Human Diseases	Transcription;Cancers;Cancers	ko03040//Spliceosome;ko05205//Proteoglycans in cancer;ko05202//Transcriptional misregulation in cancers	K12823;K12823;K12823	GO:0005575//cellular_component;GO:0005622//intracellular;GO:0005623//cell;GO:0005634//nucleus;GO:0005658//alpha DNA polymerase:primase complex;GO:0005694//chromosome;GO:0005700//polytene chromosome;GO:0005703//polytene chromosome puff;GO:0005730//nucleolus;GO:0009380//excinuclease repair complex;GO:0031974//membrane-enclosed lumen;GO:0031981//nuclear lumen;GO:0043226//organelle;GO:0043227//membra…	GO:0000166//nucleotide binding;GO:0003674//molecular_function;GO:0003676//nucleic acid binding;GO:0003677//DNA binding;GO:0003688//DNA replication origin binding;GO:0003690//double-stranded DNA binding;GO:0003723//RNA binding;GO:0003724//RNA helicase activity;GO:0003729//mRNA binding;GO:0003824//catalytic activity;GO:0004003//ATP-dependent DNA helicase activity;GO:0004004//ATP-dependent RNA helic…	GO:0000375//RNA splicing, via transesterification reactions;GO:0000377//RNA splicing, via transesterification reactions with bulged adenosine as nucleophile;GO:0000398//mRNA splicing, via spliceosome;GO:0002376//immune system process;GO:0002682//regulation of immune system process;GO:0002697//regulation of immune effector process;GO:0002831//regulation of response to biotic stimulus;GO:0006139//n…
LG04	9956601	9956800	*	4.73e-23	8.98e-20	-26.4228	g3125	Genebody	Rm62	XP_028522450.1 ATP-dependent RNA helicase p62 isoform X1 [Apis cerana]	Genetic Information Processing;Human Diseases;Human Diseases	Transcription;Cancers;Cancers	ko03040//Spliceosome;ko05205//Proteoglycans in cancer;ko05202//Transcriptional misregulation in cancers	K12823;K12823;K12823	GO:0005575//cellular_component;GO:0005622//intracellular;GO:0005623//cell;GO:0005634//nucleus;GO:0005658//alpha DNA polymerase:primase complex;GO:0005694//chromosome;GO:0005700//polytene chromosome;GO:0005703//polytene chromosome puff;GO:0005730//nucleolus;GO:0009380//excinuclease repair complex;GO:0031974//membrane-enclosed lumen;GO:0031981//nuclear lumen;GO:0043226//organelle;GO:0043227//membra…	GO:0000166//nucleotide binding;GO:0003674//molecular_function;GO:0003676//nucleic acid binding;GO:0003677//DNA binding;GO:0003688//DNA replication origin binding;GO:0003690//double-stranded DNA binding;GO:0003723//RNA binding;GO:0003724//RNA helicase activity;GO:0003729//mRNA binding;GO:0003824//catalytic activity;GO:0004003//ATP-dependent DNA helicase activity;GO:0004004//ATP-dependent RNA helic…	GO:0000375//RNA splicing, via transesterification reactions;GO:0000377//RNA splicing, via transesterification reactions with bulged adenosine as nucleophile;GO:0000398//mRNA splicing, via spliceosome;GO:0002376//immune system process;GO:0002682//regulation of immune system process;GO:0002697//regulation of immune effector process;GO:0002831//regulation of response to biotic stimulus;GO:0006139//n…
LG04	10346101	10346300	*	4.44e-20	5.89e-17	31.477	g3135	Genebody	aldh4a1	PBC31285.1 Delta-1-pyrroline-5-carboxylate dehydrogenase [Apis cerana cerana]	Metabolism;Metabolism;Metabolism	Global and overview maps;Amino acid metabolism;Amino acid metabolism	ko01100//Metabolic pathways;ko00330//Arginine and proline metabolism;ko00250//Alanine, aspartate and glutamate metabolism	K00294;K00294;K00294	GO:0005575//cellular_component;GO:0005622//intracellular;GO:0005623//cell;GO:0005737//cytoplasm;GO:0005739//mitochondrion;GO:0005759//mitochondrial matrix;GO:0005886//plasma membrane;GO:0016020//membrane;GO:0016021//integral component of membrane;GO:0031224//intrinsic component of membrane;GO:0031974//membrane-enclosed lumen;GO:0043226//organelle;GO:0043227//membrane-bounded organelle;GO:0043229/…	GO:0003674//molecular_function;GO:0003824//catalytic activity;GO:0003842//1-pyrroline-5-carboxylate dehydrogenase activity;GO:0004029//aldehyde dehydrogenase (NAD) activity;GO:0004491//methylmalonate-semialdehyde dehydrogenase (acylating) activity;GO:0004777//succinate-semialdehyde dehydrogenase (NAD+) activity;GO:0004888//transmembrane signaling receptor activity;GO:0004930//G-protein coupled re…	GO:0003008//system process;GO:0006081//cellular aldehyde metabolic process;GO:0006082//organic acid metabolic process;GO:0006091//generation of precursor metabolites and energy;GO:0006520//cellular amino acid metabolic process;GO:0006527//arginine catabolic process;GO:0006536//glutamate metabolic process;GO:0006560//proline metabolic process;GO:0006562//proline catabolic process;GO:0006574//valin…
LG04	10346201	10346400	*	3.73e-26	1.03e-22	25.5117	g3135	Genebody	aldh4a1	PBC31285.1 Delta-1-pyrroline-5-carboxylate dehydrogenase [Apis cerana cerana]	Metabolism;Metabolism;Metabolism	Global and overview maps;Amino acid metabolism;Amino acid metabolism	ko01100//Metabolic pathways;ko00330//Arginine and proline metabolism;ko00250//Alanine, aspartate and glutamate metabolism	K00294;K00294;K00294	GO:0005575//cellular_component;GO:0005622//intracellular;GO:0005623//cell;GO:0005737//cytoplasm;GO:0005739//mitochondrion;GO:0005759//mitochondrial matrix;GO:0005886//plasma membrane;GO:0016020//membrane;GO:0016021//integral component of membrane;GO:0031224//intrinsic component of membrane;GO:0031974//membrane-enclosed lumen;GO:0043226//organelle;GO:0043227//membrane-bounded organelle;GO:0043229/…	GO:0003674//molecular_function;GO:0003824//catalytic activity;GO:0003842//1-pyrroline-5-carboxylate dehydrogenase activity;GO:0004029//aldehyde dehydrogenase (NAD) activity;GO:0004491//methylmalonate-semialdehyde dehydrogenase (acylating) activity;GO:0004777//succinate-semialdehyde dehydrogenase (NAD+) activity;GO:0004888//transmembrane signaling receptor activity;GO:0004930//G-protein coupled re…	GO:0003008//system process;GO:0006081//cellular aldehyde metabolic process;GO:0006082//organic acid metabolic process;GO:0006091//generation of precursor metabolites and energy;GO:0006520//cellular amino acid metabolic process;GO:0006527//arginine catabolic process;GO:0006536//glutamate metabolic process;GO:0006560//proline metabolic process;GO:0006562//proline catabolic process;GO:0006574//valin…
LG04	10405601	10405800	*	3.88e-15	2.64e-12	34.3699	g3144	Genebody	XPO4	PBC31277.1 Exportin-4 [Apis cerana cerana]	-	-	-	-	GO:0005575//cellular_component;GO:0005622//intracellular;GO:0005623//cell;GO:0005634//nucleus;GO:0005635//nuclear envelope;GO:0005643//nuclear pore;GO:0005654//nucleoplasm;GO:0005737//cytoplasm;GO:0005829//cytosol;GO:0012505//endomembrane system;GO:0031967//organelle envelope;GO:0031974//membrane-enclosed lumen;GO:0031975//envelope;GO:0031981//nuclear lumen;GO:0032991//macromolecular complex;GO:0…	GO:0003674//molecular_function;GO:0005049//nuclear export signal receptor activity;GO:0005488//binding;GO:0005515//protein binding;GO:0008536//Ran GTPase binding;GO:0017016//Ras GTPase binding;GO:0019899//enzyme binding;GO:0031267//small GTPase binding;GO:0051020//GTPase binding	GO:0006611//protein export from nucleus;GO:0006810//transport;GO:0006886//intracellular protein transport;GO:0006913//nucleocytoplasmic transport;GO:0008104//protein localization;GO:0008150//biological_process;GO:0015031//protein transport;GO:0015833//peptide transport;GO:0032386//regulation of intracellular transport;GO:0032388//positive regulation of intracellular transport;GO:0032879//regulati…
LG04	10405701	10405900	*	3.88e-15	2.64e-12	34.3699	g3144	Genebody	XPO4	PBC31277.1 Exportin-4 [Apis cerana cerana]	-	-	-	-	GO:0005575//cellular_component;GO:0005622//intracellular;GO:0005623//cell;GO:0005634//nucleus;GO:0005635//nuclear envelope;GO:0005643//nuclear pore;GO:0005654//nucleoplasm;GO:0005737//cytoplasm;GO:0005829//cytosol;GO:0012505//endomembrane system;GO:0031967//organelle envelope;GO:0031974//membrane-enclosed lumen;GO:0031975//envelope;GO:0031981//nuclear lumen;GO:0032991//macromolecular complex;GO:0…	GO:0003674//molecular_function;GO:0005049//nuclear export signal receptor activity;GO:0005488//binding;GO:0005515//protein binding;GO:0008536//Ran GTPase binding;GO:0017016//Ras GTPase binding;GO:0019899//enzyme binding;GO:0031267//small GTPase binding;GO:0051020//GTPase binding	GO:0006611//protein export from nucleus;GO:0006810//transport;GO:0006886//intracellular protein transport;GO:0006913//nucleocytoplasmic transport;GO:0008104//protein localization;GO:0008150//biological_process;GO:0015031//protein transport;GO:0015833//peptide transport;GO:0032386//regulation of intracellular transport;GO:0032388//positive regulation of intracellular transport;GO:0032879//regulati…
[truncated: 1,531 more rows]
