# Supplementary material for: Roles of DNA Methylation in Color Alternation of Eastern Honey Bees (Apis cerana) Induced by the Royal Jelly of Western Honey Bees (Apis mellifera)
Source: Int J Mol Sci. 2024 Mar 16;25(6):3368. doi: 10.3390/ijms25063368 (PMC10969989; doi:10.3390/ijms25063368)
Supplement: Supplementary file 1 [file ijms-25-03368-s001.zip › Table S5.xlsx]

## Sheet: Table S 4 ACQ-VS-NCQ.path
Table S5 KEGG pathway enrichment
KEGG_A_class	KEGG_B_class	Pathway	CQ-VS-NQ (404)	All (3533)	Pvalue	Qvalue	Pathway ID	Genes	K_IDs	Table S 4 DMRs KEGG pathway enrichment analysis
Genetic Information Processing	Translation	mRNA surveillance pathway	18	63	0.000148681	0.0257476	ko03015	g10465;g1752;g1761;g2111;g2521;g3281;g3342;g3356;g3411;g3482;g5113;g6074;g7159;g7160;g7940;g8064;g8299;g873	K14284+K14398+K11125+K14401+K14400+K13917+K03267+K12882+K14326+K06100+K14323+K11124+K14407+K14407+K14404+K14328+K08873+K14376
Metabolism	Carbohydrate metabolism	Inositol phosphate metabolism	15	48	0.00017757	0.0257476	ko00562	g10104;g10140;g10601;g384;g4952;g5118;g5651;g5730;g6303;g6489;g7629;g765;g9167;g9173;g9820	K01106+K13711+K20278+K00923+K22913+K05858+K01110+K18081+K00888+K18082+K00921+K20279+K19801+K01099+K21798
Environmental Information Processing	Signal transduction	Phosphatidylinositol signaling system	15	57	0.00135464	0.130949	ko04070	g10104;g10140;g10601;g2295;g384;g5118;g5651;g5730;g6303;g6489;g7629;g765;g9167;g9173;g9820	K01106+K13711+K20278+K04958+K00923+K05858+K01110+K18081+K00888+K18082+K00921+K20279+K19801+K01099+K21798
Genetic Information Processing	Replication and repair	Homologous recombination	9	27	0.00217071	0.157376	ko03440	g10255;g1713;g2929;g3874;g3903;g4829;g5794;g6028;g9793	K10683+K02327+K08775+K02328+K02328+K10881+K11864+K20773+K10875
Genetic Information Processing	Translation	RNA transport	23	122	0.00971786	0.528474	ko03013	g10226;g10378;g10465;g1631;g1717;g1893;g1985;g3356;g3411;g3427;g3453;g5113;g5196;g5752;g588;g5970;g655;g6670;g6771;g6917;g7781;g8064;g8764	K15516+K03242+K14284+K05749+K03260+K03260+K14318+K12882+K14326+K14300+K14310+K14323+K03236+K14317+K14312+K14523+K03246+K12879+K03252+K03257+K12172+K14328+K03253
Metabolism	Biosynthesis of other secondary metabolites	Caffeine metabolism	2	2	0.0130473	0.528474	ko00232	g6893;g7181	K00106+K00106
Metabolism	Metabolism of other amino acids	Selenocompound metabolism	4	9	0.0132715	0.528474	ko00450	g1365;g3318;g9109;g9852	K01874+K01008+K01758+K03341
Environmental Information Processing	Signal transduction	mTOR signaling pathway	16	82	0.0210973	0.644263	ko04150	g10648;g2774;g3384;g3477;g3627;g4301;g4368;g4473;g5651;g5831;g5871;g6979;g7727;g9203;g9548;g9807	K20401+K07204+K07203+K04456+K20408+K04373+K02148+K06519+K01110+K04688+K10421+K03068+K15728+K07298+K02353+K20396
Genetic Information Processing	Folding, sorting and degradation	Protein processing in endoplasmic reticulum	21	117	0.0223454	0.644263	ko04141	g10261;g2131;g2270;g2674;g3454;g4215;g4366;g4545;g5627;g5984;g6752;g6815;g7028;g7029;g758;g760;g807;g8233;g9198;g9994;g9995	K14007+K14014+K07765+K10950+K07151+K14000+K08653+K10601+K12667+K14005+K10956+K14018+K10636+K12668+K10100+K08056+K05546+K08852+K14007+K04426+K04426
Genetic Information Processing	Translation	Ribosome biogenesis in eukaryotes	14	70	0.024557	0.644263	ko03008	g10465;g2319;g3183;g41;g4793;g5251;g5763;g5970;g6204;g6621;g6842;g7736;g8607;g9782	K14284+K14563+K14550+K14570+K11128+K14554+K03685+K14523+K11131+K14572+K12618+K14569+K14571+K14560
Human Diseases	Drug resistance	Antifolate resistance	5	16	0.028596	0.644263	ko01523	g3419;g3420;g3485;g3486;g5467	K05673+K05673+K05673+K05673+K05665
Cellular Processes	Transport and catabolism	Regulation of autophagy	16	85	0.0288807	0.644263	ko04140	g1008;g10246;g1362;g2295;g2774;g3384;g3477;g4417;g4576;g4739;g5651;g5831;g6489;g8233;g8766;g9203	K08333+K17908+K08803+K04958+K07204+K07203+K04456+K07874+K17906+K10802+K01110+K04688+K18082+K08852+K11248+K07298
Genetic Information Processing	Replication and repair	Base excision repair	6	22	0.0326115	0.675524	ko03410	g1713;g3874;g3903;g4739;g654;g7866	K02327+K02328+K02328+K10802+K24070+K02324
Human Diseases	Endocrine and metabolic diseases	Insulin resistance	11	54	0.0386496	0.747226	ko04931	g10303;g10343;g1221;g1881;g2005;g3384;g3477;g3800;g4301;g5651;g5831	K08745+K08745+K07197+K07200+K08765+K07203+K04456+K05696+K04373+K01110+K04688
Environmental Information Processing	Signal transduction	Sphingolipid signaling pathway	10	49	0.046924	0.800468	ko04071	g1192;g3477;g5025;g5118;g5335;g5467;g5651;g6899;g9994;g9995	K17388+K04456+K04716+K05858+K04392+K05665+K01110+K04441+K04426+K04426
Genetic Information Processing	Folding, sorting and degradation	RNA degradation	12	63	0.0501099	0.807327	ko03018	g10537;g10553;g1309;g1464;g2853;g294;g3343;g3945;g5673;g5674;g6842;g719	K12591+K12606+K04043+K03514+K12624+K12614+K12585+K12604+K03679+K03679+K12618+K12617
Genetic Information Processing	Folding, sorting and degradation	Ubiquitin mediated proteolysis	15	87	0.0659495	0.988982	ko04120	g1226;g1398;g1834;g3422;g4433;g4545;g4680;g496;g502;g5393;g6340;g752;g7915;g8430;g9853	K03354+K10587+K10571+K10593+K10590+K10601+K10586+K10260+K10596+K10686+K10592+K16061+K10685+K03870+K03348
Human Diseases	Neurodegenerative diseases	Amyotrophic lateral sclerosis (ALS)	6	26	0.0682057	0.988982	ko05014	g5335;g6899;g6982;g7709;g9994;g9995	K04392+K04441+K04575+K11518+K04426+K04426
Cellular Processes	Cell growth and death	Apoptosis	10	54	0.0819993	0.99907	ko04210	g1902;g2295;g3477;g4695;g5470;g654;g8233;g9113;g9994;g9995	K04398+K04958+K04456+K01373+K07374+K24070+K08852+K07611+K04426+K04426
Cellular Processes	Transport and catabolism	Autophagy - other eukaryotes	5	22	0.0977612	0.99907	ko04136	g1008;g10246;g2774;g3384;g4576	K08333+K17908+K07204+K07203+K17906
Cellular Processes	Cellular commiunity	Tight junction	11	65	0.11672	0.99907	ko04530	g1192;g1881;g2128;g2882;g3482;g5335;g5470;g5485;g9203;g9994;g9995	K17388+K07200+K21066+K06094+K06100+K04392+K07374+K16175+K07298+K04426+K04426
Human Diseases	Cancers	Pancreatic cancer	6	30	0.119843	0.99907	ko05212	g10070;g2929;g3384;g3477;g5335;g5831	K04501+K08775+K07203+K04456+K04392+K04688
Environmental Information Processing	Membrane transport	ABC transporters	6	31	0.135125	0.99907	ko02010	g3419;g3420;g3485;g3486;g5467;g8568	K05673+K05673+K05673+K05673+K05665+K05661
Metabolism	Amino acid metabolism	Cysteine and methionine metabolism	7	38	0.135941	0.99907	ko00270	g213;g214;g4369;g6475;g7591;g9109;g95	K00547+K00547+K00772+K00058+K00558+K01758+K21456
Cellular Processes	Transport and catabolism	Endocytosis	18	120	0.136149	0.99907	ko04144	g103;g1554;g1794;g2693;g3094;g3344;g3445;g3621;g3894;g4169;g4329;g5616;g6415;g6779;g8008;g8496;g8766;g8973	K04646+K12493+K11824+K12484+K10396+K04679+K12480+K12198+K12472+K10365+K10364+K12199+K18442+K19475+K18464+K12182+K11248+K18462
Human Diseases	Cardiovascular diseases	Viral myocarditis	4	18	0.141871	0.99907	ko05416	g1717;g1893;g1902;g5335	K03260+K03260+K04398+K04392
Organismal Systems	Endocrine system	Adipocytokine signaling pathway	5	25	0.149316	0.99907	ko04920	g1881;g2005;g3384;g3477;g9203	K07200+K08765+K07203+K04456+K07298
Organismal Systems	Excretory system	Collecting duct acid secretion	3	12	0.149746	0.99907	ko04966	g10173;g1718;g4368	K02153+K02155+K02148
Human Diseases	Infectious diseases	Human papillomavirus infection	20	138	0.154893	0.99907	ko05165	g10112;g10173;g1398;g1718;g1902;g2882;g2976;g3090;g3384;g3477;g4368;g5195;g5485;g5651;g5831;g6780;g7475;g8226;g8362;g9548	K08957+K02153+K10587+K02155+K04398+K06094+K05635+K02157+K07203+K04456+K02148+K00873+K16175+K01110+K04688+K11643+K06067+K10691+K06640+K02353
Human Diseases	Cancers	Breast cancer	9	54	0.157236	0.99907	ko05224	g10112;g2929;g3090;g3384;g3477;g5651;g5831;g6979;g9548	K08957+K08775+K02157+K07203+K04456+K01110+K04688+K03068+K02353
Environmental Information Processing	Signal transduction	AMPK signaling pathway	10	63	0.176848	0.99907	ko04152	g1221;g1881;g2005;g2774;g3384;g3477;g4340;g5831;g7528;g9203	K07197+K07200+K08765+K07204+K07203+K04456+K03234+K04688+K00665+K07298
Genetic Information Processing	Replication and repair	Nucleotide excision repair	6	34	0.185961	0.99907	ko03420	g1713;g3874;g3903;g4893;g6018;g7866	K02327+K02328+K02328+K10846+K10841+K02324
Metabolism	Amino acid metabolism	Histidine metabolism	2	7	0.1862	0.99907	ko00340	g1972;g3628	K14085+K00128
Metabolism	Glycan biosynthesis and metabolism	Glycosphingolipid biosynthesis - globo series	2	7	0.1862	0.99907	ko00603	g10030;g4850	K00718+K01204
Human Diseases	Infectious diseases	Salmonella infection	15	104	0.20356	0.99907	ko05132	g10446;g1192;g1631;g1902;g3477;g3478;g5089;g5335;g6476;g6888;g6899;g749;g7737;g8525;g8778	K15348+K17388+K05749+K04398+K04456+K17637+K20180+K04392+K10089+K10418+K04441+K10413+K04437+K20179+K20181
Metabolism	Carbohydrate metabolism	Pyruvate metabolism	6	35	0.204374	0.99907	ko00620	g1972;g2723;g3628;g3886;g5195;g9239	K14085+K00162+K00128+K01069+K00873+K00161
Cellular Processes	Transport and catabolism	Phagosome	11	73	0.206842	0.99907	ko04145	g10173;g1718;g3408;g4368;g5335;g5470;g6476;g6752;g749;g7629;g8496	K02153+K02155+K08492+K02148+K04392+K07374+K10089+K10956+K10413+K00921+K12182
Human Diseases	Cancers	Central carbon metabolism in cancer	6	36	0.223412	0.99907	ko05230	g2723;g3384;g3477;g5195;g5651;g9239	K00162+K07203+K04456+K00873+K01110+K00161
Genetic Information Processing	Transcription	Spliceosome	15	106	0.225235	0.99907	ko03040	g10051;g10128;g10463;g2187;g2853;g3125;g3356;g3421;g3451;g4427;g5818;g6035;g6670;g6924;g8384	K12861+K12838+K12826+K12822+K12624+K12823+K12882+K12830+K12855+K12874+K12867+K12828+K12879+K12815+K12858
Metabolism	Glycan biosynthesis and metabolism	Glycosphingolipid biosynthesis - lacto and neolacto series	2	8	0.230401	0.99907	ko00601	g10030;g9354	K00718+K07819
Metabolism	Glycan biosynthesis and metabolism	N-Glycan biosynthesis	5	29	0.231651	0.99907	ko00510	g3454;g5627;g6385;g7029;g807	K07151+K12667+K00726+K12668+K05546
Human Diseases	Drug resistance	Platinum drug resistance	5	30	0.254012	0.99907	ko01524	g1902;g3477;g6284;g9994;g9995	K04398+K04456+K03164+K04426+K04426
Organismal Systems	Immune system	Leukocyte transendothelial migration	5	30	0.254012	0.99907	ko04670	g10172;g1192;g5335;g6899;g929	K05691+K17388+K04392+K04441+K13709
Organismal Systems	Endocrine system	Progesterone-mediated oocyte maturation	8	53	0.254892	0.99907	ko04914	g1226;g2854;g3477;g4301;g6572;g6899;g789;g9853	K03354+K04367+K04456+K04373+K06679+K04441+K02178+K03348
Organismal Systems	Endocrine system	Glucagon signaling pathway	9	62	0.273734	0.99907	ko04922	g1881;g2005;g2295;g2723;g3477;g5118;g5195;g8117;g9239	K07200+K08765+K04958+K00162+K04456+K05858+K00873+K16311+K00161
Cellular Processes	Cell growth and death	Apoptosis - multiple species	3	16	0.273907	0.99907	ko04215	g1902;g4680;g752	K04398+K10586+K16061
Human Diseases	Cancers	Viral carcinogenesis	12	86	0.274389	0.99907	ko05203	g10599;g1398;g1902;g2028;g2269;g5195;g5335;g5485;g6572;g6780;g7475;g8226	K11838+K10587+K04398+K09504+K03123+K00873+K04392+K16175+K06679+K11643+K06067+K10691
Metabolism	Glycan biosynthesis and metabolism	Various types of N-glycan biosynthesis	5	31	0.276875	0.99907	ko00513	g3454;g3526;g5627;g6385;g7029	K07151+K09673+K12667+K00726+K12668
Genetic Information Processing	Translation	Aminoacyl-tRNA biosynthesis	6	39	0.283562	0.99907	ko00970	g1365;g2864;g3428;g4995;g8869;g9852	K01874+K01873+K01873+K01890+K01875+K03341
Human Diseases	Infectious diseases	Toxoplasmosis	6	39	0.283562	0.99907	ko05145	g1902;g2976;g3477;g6899;g698;g752	K04398+K05635+K04456+K04441+K09565+K16061
Organismal Systems	Aging	Longevity regulating pathway - worm	9	63	0.289882	0.99907	ko04212	g1309;g3141;g3384;g3477;g5651;g5831;g654;g6899;g7877	K04043+K04564+K07203+K04456+K01110+K04688+K24070+K04441+K09414
Human Diseases	Cancers	Colorectal cancer	6	40	0.304381	0.99907	ko05210	g10070;g3090;g3384;g3477;g5335;g5831	K04501+K02157+K07203+K04456+K04392+K04688
Environmental Information Processing	Signal transduction	Wnt signaling pathway	11	81	0.318493	0.99907	ko04310	g10070;g10112;g1192;g3090;g3310;g5118;g5335;g6289;g6759;g6979;g9548	K04501+K08957+K17388+K02157+K23491+K05858+K04392+K05122+K04499+K03068+K02353
Metabolism	Lipid metabolism	Fatty acid degradation	4	25	0.318681	0.99907	ko00071	g1972;g2005;g2635;g3628	K14085+K08765+K00248+K00128
Human Diseases	Infectious diseases	Shigellosis	14	106	0.323602	0.99907	ko05131	g1008;g10246;g1192;g2295;g2539;g2774;g3384;g3477;g5118;g5335;g5831;g615;g6899;g8574	K08333+K17908+K17388+K04958+K05864+K07204+K07203+K04456+K05858+K04392+K04688+K17988+K04441+K11253
Human Diseases	Endocrine and metabolic diseases	AGE-RAGE signaling pathway in diabetic complications	5	33	0.323687	0.99907	ko04933	g10070;g3477;g5118;g5335;g6899	K04501+K04456+K05858+K04392+K04441
Cellular Processes	Cell growth and death	Cell cycle	10	74	0.336602	0.99907	ko04110	g10070;g1226;g3202;g5563;g6572;g7475;g789;g8362;g8941;g9853	K04501+K03354+K02213+K06642+K06679+K06067+K02178+K06640+K02214+K03348
Metabolism	Carbohydrate metabolism	Ascorbate and aldarate metabolism	3	18	0.339724	0.99907	ko00053	g1972;g3628;g6754	K14085+K00128+K01053
Organismal Systems	Immune system	RIG-I-like receptor signaling pathway	3	18	0.339724	0.99907	ko04622	g1902;g1955;g6899	K04398+K09578+K04441
Cellular Processes	Cell growth and death	Apoptosis - fly	7	50	0.344919	0.99907	ko04214	g1902;g4680;g654;g8362;g9113;g9994;g9995	K04398+K10586+K24070+K06640+K07611+K04426+K04426
Human Diseases	Infectious diseases	Herpes simplex infection	13	100	0.354402	0.99907	ko05168	g10465;g1902;g3384;g3467;g3477;g4161;g4531;g4778;g5295;g6019;g7070;g760;g8789	K14284+K04398+K07203+K09228+K04456+K09228+K09228+K09228+K09228+K09228+K09228+K08056+K09228
Human Diseases	Infectious diseases	Epstein-Barr virus infection	9	67	0.356558	0.99907	ko05169	g10599;g1902;g3477;g4829;g5335;g6203;g6899;g7475;g760	K11838+K04398+K04456+K10881+K04392+K03030+K04441+K06067+K08056
Environmental Information Processing	Signal transduction	FoxO signaling pathway	8	59	0.360566	0.99907	ko04068	g10070;g10599;g1881;g3141;g3477;g5651;g6899;g9203	K04501+K11838+K07200+K04564+K04456+K01110+K04441+K07298
Organismal Systems	Aging	Longevity regulating pathway - mammal	7	51	0.364471	0.99907	ko04211	g1881;g2774;g3141;g3384;g3477;g5831;g9203	K07200+K07204+K04564+K07203+K04456+K04688+K07298
Metabolism	Lipid metabolism	Glycerolipid metabolism	6	43	0.368134	0.99907	ko00561	g10006;g1972;g3628;g6041;g7727;g9957	K00629+K14085+K00128+K00864+K15728+K13506
Metabolism	Carbohydrate metabolism	Citrate cycle (TCA cycle)	5	35	0.371276	0.99907	ko00020	g2723;g7752;g8569;g8959;g9239	K00162+K00164+K01648+K01647+K00161
Environmental Information Processing	Signal transduction	TNF signaling pathway	5	35	0.371276	0.99907	ko04668	g1902;g3477;g6899;g9994;g9995	K04398+K04456+K04441+K04426+K04426
Metabolism	Carbohydrate metabolism	Starch and sucrose metabolism	3	19	0.372589	0.99907	ko00500	g2025;g7576;g9200	K00700+K12316+K01196
Genetic Information Processing	Replication and repair	Mismatch repair	3	19	0.372589	0.99907	ko03430	g1713;g3874;g3903	K02327+K02328+K02328
Human Diseases	Immune diseases	Rheumatoid arthritis	3	19	0.372589	0.99907	ko05323	g10173;g1718;g4368	K02153+K02155+K02148
Environmental Information Processing	Signal transduction	MAPK signaling pathway - fly	12	93	0.373521	0.99907	ko04013	g1015;g1991;g2670;g3117;g3141;g5335;g5793;g6899;g7686;g7984;g9994;g9995	K20223+K12380+K04352+K04417+K04564+K04392+K18529+K04441+K08840+K17608+K04426+K04426
Metabolism	Metabolism of other amino acids	Phosphonate and phosphinate metabolism	1	4	0.384891	0.99907	ko00440	g9773	K13644
Metabolism	Glycan biosynthesis and metabolism	Glycosphingolipid biosynthesis - ganglio series	1	4	0.384891	0.99907	ko00604	g9318	K03372
Genetic Information Processing	Folding, sorting and degradation	Sulfur relay system	1	4	0.384891	0.99907	ko04122	g6031	K14168
Human Diseases	Infectious diseases	Vibrio cholerae infection	5	36	0.395125	0.99907	ko05110	g10173;g1718;g2674;g4368;g6752	K02153+K02155+K10950+K02148+K10956
Human Diseases	Neurodegenerative diseases	Alzheimer's disease	23	188	0.396864	0.99907	ko05010	g1008;g10112;g10246;g1902;g2295;g2539;g3090;g3094;g3384;g3477;g4576;g5118;g5399;g5470;g5608;g6388;g6979;g698;g8233;g8381;g9548;g9994;g9995	K08333+K08957+K17908+K04398+K04958+K05864+K02157+K10396+K07203+K04456+K17906+K05858+K06172+K07374+K03934+K03953+K03068+K09565+K08852+K02133+K02353+K04426+K04426
Cellular Processes	Cellular commiunity	Signaling pathways regulating pluripotency of stem cells	8	61	0.397008	0.99907	ko04550	g10070;g3090;g3477;g6899;g8727;g8801;g9206;g9548	K04501+K02157+K04456+K04441+K11138+K04675+K11421+K02353
Environmental Information Processing	Signal transduction	HIF-1 signaling pathway	7	53	0.403767	0.99907	ko04066	g2723;g3384;g3477;g3696;g5831;g8430;g9239	K00162+K07203+K04456+K09097+K04688+K03870+K00161
Metabolism	Glycan biosynthesis and metabolism	Glycosaminoglycan biosynthesis - chondroitin sulfate / dermatan sulfate	2	12	0.40645	0.99907	ko00532	g3362;g7916	K03419+K01017
Metabolism	Metabolism of cofactors and vitamins	Pantothenate and CoA biosynthesis	2	12	0.40645	0.99907	ko00770	g10031;g5088	K09680+K01922
Cellular Processes	Cell growth and death	Oocyte meiosis	9	70	0.407785	0.99907	ko04114	g1226;g2295;g2854;g4174;g4301;g6572;g6899;g789;g9853	K03354+K04958+K04367+K13054+K04373+K06679+K04441+K02178+K03348
Metabolism	Amino acid metabolism	Lysine degradation	6	45	0.411023	0.99907	ko00310	g1972;g3628;g6919;g7270;g9206;g9675	K14085+K00128+K11423+K11424+K11421+K09188
Environmental Information Processing	Signal transduction	TGF-beta signaling pathway	5	37	0.418894	0.99907	ko04350	g10070;g3344;g5831;g8365;g8801	K04501+K04679+K04688+K06766+K04675
Organismal Systems	Aging	Longevity regulating pathway - multiple species	7	54	0.42341	0.99907	ko04213	g1881;g2774;g3141;g3384;g3477;g5831;g7475	K07200+K07204+K04564+K07203+K04456+K04688+K06067
Human Diseases	Infectious diseases	Pathogenic Escherichia coli infection	10	80	0.433198	0.99907	ko05130	g10261;g1192;g1631;g1902;g4417;g5335;g5470;g6779;g6899;g9198	K14007+K17388+K05749+K04398+K07874+K04392+K07374+K19475+K04441+K14007
Cellular Processes	Cell growth and death	p53 signaling pathway	3	21	0.437158	0.99907	ko04115	g1902;g5651;g8362	K04398+K01110+K06640
Metabolism	Amino acid metabolism	Glycine, serine and threonine metabolism	4	30	0.454234	0.99907	ko00260	g1972;g6475;g6760;g9109	K14085+K00058+K00281+K01758
Metabolism	Amino acid metabolism	Arginine and proline metabolism	4	30	0.454234	0.99907	ko00330	g1972;g3135;g3628;g92	K14085+K00294+K00128+K00318
Organismal Systems	Immune system	Toll-like receptor signaling pathway	4	30	0.454234	0.99907	ko04620	g1902;g3477;g5335;g6899	K04398+K04456+K04392+K04441
Environmental Information Processing	Signal transduction	VEGF signaling pathway	3	22	0.468516	0.99907	ko04370	g3477;g5335;g6899	K04456+K04392+K04441
Organismal Systems	Immune system	Th17 cell differentiation	3	22	0.468516	0.99907	ko04659	g10070;g3384;g6899	K04501+K07203+K04441
Organismal Systems	Immune system	Fc epsilon RI signaling pathway	3	22	0.468516	0.99907	ko04664	g3477;g5335;g6899	K04456+K04392+K04441
Human Diseases	Infectious diseases	Legionellosis	3	22	0.468516	0.99907	ko05134	g1902;g4417;g7877	K04398+K07874+K09414
Metabolism	Glycan biosynthesis and metabolism	Glycosaminoglycan biosynthesis - heparan sulfate / heparin	2	14	0.487469	0.99907	ko00534	g7809;g7949	K02366+K02370
Organismal Systems	Endocrine system	Thyroid hormone signaling pathway	8	66	0.487712	0.99907	ko04919	g1691;g1948;g3384;g3477;g5118;g5400;g7475;g8508	K15164+K15162+K07203+K04456+K05858+K15133+K06067+K15167
Human Diseases	Infectious diseases	Epithelial cell signaling in Helicobacter pylori infection	5	40	0.488946	0.99907	ko05120	g10173;g1718;g4368;g5335;g6899	K02153+K02155+K02148+K04392+K04441
Organismal Systems	Endocrine system	Insulin signaling pathway	9	75	0.492852	0.99907	ko04910	g10104;g1221;g1881;g2774;g3384;g3477;g3800;g5831;g7528	K01106+K07197+K07200+K07204+K07203+K04456+K05696+K04688+K00665
Metabolism	Carbohydrate metabolism	Glycolysis / Gluconeogenesis	6	49	0.495495	0.99907	ko00010	g1972;g2723;g3466;g3628;g5195;g9239	K14085+K00162+K08074+K00128+K00873+K00161
Environmental Information Processing	Signal transduction	Apelin signaling pathway	8	67	0.505496	0.99907	ko04371	g10070;g1008;g1881;g2295;g3384;g3477;g5118;g5831	K04501+K08333+K07200+K04958+K07203+K04456+K05858+K04688
Human Diseases	Drug resistance	EGFR tyrosine kinase inhibitor resistance	4	32	0.506278	0.99907	ko01521	g3384;g3477;g5651;g5831	K07203+K04456+K01110+K04688
Human Diseases	Cancers	Endometrial cancer	4	32	0.506278	0.99907	ko05213	g10172;g3090;g3477;g5651	K05691+K02157+K04456+K01110
Organismal Systems	Environmental adaptation	Circadian rhythm	2	15	0.525315	0.99907	ko04710	g1881;g3914	K07200+K02223
Human Diseases	Cancers	Melanoma	2	15	0.525315	0.99907	ko05218	g3477;g5651	K04456+K01110
Metabolism	Lipid metabolism	Glycerophospholipid metabolism	7	60	0.538398	0.99907	ko00564	g10006;g5747;g6775;g7727;g8765;g9773;g9957	K00629+K14676+K00111+K15728+K00995+K13644+K13506
Genetic Information Processing	Replication and repair	DNA replication	4	34	0.556	0.99907	ko03030	g1713;g3874;g3903;g7866	K02327+K02328+K02328+K02324
Human Diseases	Cancers	Acute myeloid leukemia	3	25	0.557352	0.99907	ko05221	g3384;g3477;g5831	K07203+K04456+K04688
Human Diseases	Cancers	MicroRNAs in cancer	8	70	0.557571	0.99907	ko05206	g10552;g2774;g3384;g5467;g5651;g7475;g7591;g8456	K17391+K07204+K07203+K05665+K01110+K06067+K00558+K17387
Metabolism	Lipid metabolism	Ether lipid metabolism	2	16	0.56123	0.99907	ko00565	g72;g9773	K00803+K13644
Metabolism	Glycan biosynthesis and metabolism	Mucin type O-glycan biosynthesis	1	7	0.572929	0.99907	ko00512	g175	K00710
Metabolism	Metabolism of cofactors and vitamins	Riboflavin metabolism	1	7	0.572929	0.99907	ko00740	g3564	K00953
Human Diseases	Infectious diseases	African trypanosomiasis	1	7	0.572929	0.99907	ko05143	g5118	K05858
Human Diseases	Cardiovascular diseases	Fluid shear stress and atherosclerosis	6	53	0.575522	0.99907	ko05418	g3477;g5335;g6899;g8801;g9994;g9995	K04456+K04392+K04441+K04675+K04426+K04426
Organismal Systems	Immune system	NOD-like receptor signaling pathway	5	44	0.577058	0.99907	ko04621	g1902;g2295;g5118;g5794;g6899	K04398+K04958+K05858+K11864+K04441
Organismal Systems	Digestive system	Bile secretion	5	44	0.577058	0.99907	ko04976	g2855;g3419;g3420;g3485;g3486	K13855+K05673+K05673+K05673+K05673
Organismal Systems	Endocrine system	PPAR signaling pathway	4	35	0.579835	0.99907	ko03320	g10303;g10343;g2005;g6041	K08745+K08745+K08765+K00864
Human Diseases	Endocrine and metabolic diseases	Non-alcoholic fatty liver disease (NAFLD)	10	90	0.589523	0.99907	ko04932	g1221;g1881;g1902;g3477;g5335;g5608;g6388;g8233;g9994;g9995	K07197+K07200+K04398+K04456+K04392+K03934+K03953+K08852+K04426+K04426
Human Diseases	Neurodegenerative diseases	Huntington's disease	22	198	0.593852	0.99907	ko05016	g1008;g10246;g103;g1794;g1902;g2295;g3094;g3141;g3384;g4576;g5118;g5470;g5608;g6388;g698;g7475;g8233;g8381;g8873;g9123;g9994;g9995	K08333+K17908+K04646+K11824+K04398+K04958+K10396+K04564+K07203+K17906+K05858+K07374+K03934+K03953+K09565+K06067+K08852+K02133+K03010+K10409+K04426+K04426
Metabolism	Glycan biosynthesis and metabolism	Glycosylphosphatidylinositol(GPI)-anchor biosynthesis	2	17	0.595161	0.99907	ko00563	g2479;g6719	K03434+K03857
Human Diseases	Infectious diseases	Chagas disease (American trypanosomiasis)	4	36	0.602924	0.99907	ko05142	g1902;g3477;g5118;g6899	K04398+K04456+K05858+K04441
Human Diseases	Cancers	Small cell lung cancer	4	36	0.602924	0.99907	ko05222	g2976;g3477;g5651;g752	K05635+K04456+K01110+K16061
Environmental Information Processing	Signal transduction	Hippo signaling pathway	7	64	0.609661	0.99907	ko04390	g10070;g10172;g2882;g3090;g5351;g5485;g9548	K04501+K05691+K06094+K02157+K16685+K16175+K02353
Human Diseases	Infectious diseases	Kaposi's sarcoma-associated herpesvirus infection	6	55	0.613093	0.99907	ko05167	g1902;g2295;g3384;g3477;g5335;g6899	K04398+K04958+K07203+K04456+K04392+K04441
Genetic Information Processing	Translation	Ribosome	12	110	0.615823	0.99907	ko03010	g10052;g10462;g1055;g1218;g1877;g197;g4953;g5203;g6923;g7708;g8767;g98	K02930+K02900+K02990+K02889+K02936+K02881+K02927+K02974+K02893+K02874+K02964+K02902
Cellular Processes	Transport and catabolism	Lysosome	9	83	0.620499	0.99907	ko04142	g103;g1718;g3511;g4695;g4850;g5268;g6476;g7576;g9021	K04646+K02155+K12385+K01373+K01204+K12394+K10089+K12316+K12391
Genetic Information Processing	Replication and repair	Non-homologous end-joining	1	8	0.621862	0.99907	ko03450	g5563	K06642
Cellular Processes	Cell growth and death	Ferroptosis	2	18	0.627091	0.99907	ko04216	g4473;g95	K06519+K21456
Environmental Information Processing	Signal transduction	Notch signaling pathway	3	28	0.636682	0.99907	ko04330	g5399;g7475;g9548	K06172+K06067+K02353
Human Diseases	Cancers	Proteoglycans in cancer	10	94	0.646433	0.99907	ko05205	g1192;g2295;g3125;g3384;g3477;g5335;g5763;g5831;g6899;g7737	K17388+K04958+K12823+K07203+K04456+K04392+K03685+K04688+K04441+K04437
Organismal Systems	Nervous system	Neurotrophin signaling pathway	6	57	0.648747	0.99907	ko04722	g3477;g4301;g5335;g6899;g9994;g9995	K04456+K04373+K04392+K04441+K04426+K04426
Human Diseases	Infectious diseases	Tuberculosis	5	48	0.656491	0.99907	ko05152	g1309;g1718;g1902;g3477;g6899	K04043+K02155+K04398+K04456+K04441
Metabolism	Metabolism of other amino acids	beta-Alanine metabolism	3	29	0.660814	0.99907	ko00410	g1972;g2635;g3628	K14085+K00248+K00128
Human Diseases	Cancers	Chronic myeloid leukemia	3	29	0.660814	0.99907	ko05220	g10070;g3477;g7475	K04501+K04456+K06067
Genetic Information Processing	Folding, sorting and degradation	Proteasome	4	39	0.667397	0.99907	ko03050	g1219;g4523;g4829;g6203	K02725+K06699+K10881+K03030				Table S.4 DMRs KEGG pathway enrichment analysis
Metabolism	Global and Overview	Carbon metabolism	10	96	0.673208	0.99907	ko01200	g2635;g2723;g3466;g5195;g6475;g6754;g6760;g7752;g8959;g9239	K00248+K00162+K08074+K00873+K00058+K01053+K00281+K00164+K01647+K00161
Human Diseases	Cancers	Pathways in cancer	20	188	0.673262	0.99907	ko05200	g10070;g10172;g1192;g1362;g1902;g2929;g2976;g3090;g3384;g3477;g3696;g5118;g5335;g5651;g5831;g6979;g7475;g752;g8430;g9548	K04501+K05691+K17388+K08803+K04398+K08775+K05635+K02157+K07203+K04456+K09097+K05858+K04392+K01110+K04688+K03068+K06067+K16061+K03870+K02353
Cellular Processes	Cell growth and death	Necroptosis	5	49	0.674786	0.99907	ko04217	g1902;g2539;g3621;g4739;g654	K04398+K05864+K12198+K10802+K24070
Organismal Systems	Immune system	Platelet activation	5	49	0.674786	0.99907	ko04611	g1192;g2295;g3477;g5118;g6899	K17388+K04958+K04456+K05858+K04441
Organismal Systems	Excretory system	Endocrine and other factor-regulated calcium reabsorption	3	30	0.683768	0.99907	ko04961	g103;g1794;g5118	K04646+K11824+K05858
Human Diseases	Cancers	Glioma	3	30	0.683768	0.99907	ko05214	g3384;g3477;g5651	K07203+K04456+K01110
Metabolism	Metabolism of cofactors and vitamins	Nicotinate and nicotinamide metabolism	2	20	0.685022	0.99907	ko00760	g10455;g6756	K01950+K01239
Environmental Information Processing	Signal transduction	MAPK signaling pathway	10	97	0.686142	0.99907	ko04010	g2670;g3477;g3938;g4301;g5335;g6816;g6899;g7737;g9994;g9995	K04352+K04456+K04422+K04373+K04392+K04459+K04441+K04437+K04426+K04426
Metabolism	Glycan biosynthesis and metabolism	Mannose type O-glycan biosyntheis	1	10	0.703583	0.99907	ko00515	g1194	K00728
Organismal Systems	Development	Osteoclast differentiation	3	31	0.705545	0.99907	ko04380	g3477;g5335;g6899	K04456+K04392+K04441
Metabolism	Amino acid metabolism	Tryptophan metabolism	2	21	0.711113	0.99907	ko00380	g1972;g3628	K14085+K00128
Metabolism	Lipid metabolism	Sphingolipid metabolism	2	21	0.711113	0.99907	ko00600	g5025;g5866	K04716+K12353
Environmental Information Processing	Signal transduction	Hedgehog signaling pathway	2	21	0.711113	0.99907	ko04340	g10112;g6470	K08957+K06233
Organismal Systems	Immune system	IL-17 signaling pathway	2	21	0.711113	0.99907	ko04657	g1902;g6899	K04398+K04441
Organismal Systems	Digestive system	Carbohydrate digestion and absorption	2	21	0.711113	0.99907	ko04973	g3477;g5118	K04456+K05858
Organismal Systems	Digestive system	Vitamin digestion and absorption	2	21	0.711113	0.99907	ko04977	g5467;g5867	K05665+K14611
Human Diseases	Cancers	Chemical carcinogenesis	2	21	0.711113	0.99907	ko05204	g3696;g5545	K09097+K04097
Cellular Processes	Transport and catabolism	Peroxisome	6	61	0.713782	0.99907	ko04146	g2109;g3141;g3345;g6893;g7181;g72	K12663+K04564+K00308+K00106+K00106+K00803
Metabolism	Glycan biosynthesis and metabolism	Other types of O-glycan biosynthesis	2	22	0.735372	0.99907	ko00514	g1194;g175	K00728+K00710
Environmental Information Processing	Signal transduction	Jak-STAT signaling pathway	2	22	0.735372	0.99907	ko04630	g3384;g3477	K07203+K04456
Human Diseases	Cancers	Basal cell carcinoma	2	22	0.735372	0.99907	ko05217	g3090;g9548	K02157+K02353
Metabolism	Lipid metabolism	Fatty acid biosynthesis	1	11	0.737574	0.99907	ko00061	g7528	K00665
Metabolism	Metabolism of cofactors and vitamins	One carbon pool by folate	1	11	0.737574	0.99907	ko00670	g3112	K01934
Organismal Systems	Immune system	Antigen processing and presentation	1	11	0.737574	0.99907	ko04612	g760	K08056
Organismal Systems	Environmental adaptation	Circadian rhythm - fly	1	11	0.737574	0.99907	ko04711	g3914	K02223
Human Diseases	Cancers	Bladder cancer	1	11	0.737574	0.99907	ko05219	g1362	K08803
Human Diseases	Infectious diseases	Influenza A	5	53	0.741359	0.99907	ko05164	g10465;g1902;g3477;g5554;g7940	K14284+K04398+K04456+K15042+K14404
Human Diseases	Drug resistance	Endocrine resistance	4	43	0.74163	0.99907	ko01522	g3384;g3477;g5831;g6899	K07203+K04456+K04688+K04441
Human Diseases	Cancers	Renal cell carcinoma	4	43	0.74163	0.99907	ko05211	g3477;g3696;g5335;g8430	K04456+K09097+K04392+K03870
Organismal Systems	Sensory system	Phototransduction - fly	3	33	0.745629	0.99907	ko04745	g2295;g5118;g7795	K04958+K05858+K13805
Cellular Processes	Cell growth and death	Cellular senescence	7	73	0.745791	0.99907	ko04218	g2295;g2539;g3384;g3477;g5651;g6899;g8362	K04958+K05864+K07203+K04456+K01110+K04441+K06640
Metabolism	Carbohydrate metabolism	Galactose metabolism	2	23	0.757877	0.99907	ko00052	g4973;g7576	K01784+K12316
Human Diseases	Endocrine and metabolic diseases	Type II diabetes mellitus	2	23	0.757877	0.99907	ko04930	g3384;g5195	K07203+K00873
Metabolism	Amino acid metabolism	Valine, leucine and isoleucine degradation	3	34	0.76398	0.99907	ko00280	g1972;g2635;g3628	K14085+K00248+K00128
Environmental Information Processing	Signal transduction	ErbB signaling pathway	3	34	0.76398	0.99907	ko04012	g3384;g3477;g5831	K07203+K04456+K04688
Organismal Systems	Immune system	Fc gamma R-mediated phagocytosis	3	34	0.76398	0.99907	ko04666	g3477;g5335;g5831	K04456+K04392+K04688
Organismal Systems	Endocrine system	Thyroid hormone synthesis	3	34	0.76398	0.99907	ko04918	g2295;g5118;g6470	K04958+K05858+K06233
Metabolism	Carbohydrate metabolism	Glyoxylate and dicarboxylate metabolism	2	24	0.77871	0.99907	ko00630	g6760;g8959	K00281+K01647
Genetic Information Processing	Transcription	Basal transcription factors	3	35	0.781244	0.99907	ko03022	g1170;g2269;g3882	K03130+K03123+K03125
Cellular Processes	Cellular commiunity	Focal adhesion	7	77	0.794257	0.99907	ko04510	g1192;g2976;g3477;g5335;g5651;g7737;g929	K17388+K05635+K04456+K04392+K01110+K04437+K13709
Human Diseases	Endocrine and metabolic diseases	Maturity onset diabetes of the young	1	13	0.794333	0.99907	ko04950	g3902	K08040
Human Diseases	Neurodegenerative diseases	Prion diseases	1	13	0.794333	0.99907	ko05020	g2976	K05635
Organismal Systems	Immune system	B cell receptor signaling pathway	2	25	0.797959	0.99907	ko04662	g3477;g5335	K04456+K04392
Metabolism	Carbohydrate metabolism	Amino sugar and nucleotide sugar metabolism	4	47	0.802604	0.99907	ko00520	g4145;g4973;g7952;g8643	K01183+K01784+K08678+K00966
Cellular Processes	Cellular commiunity	Adherens junction	4	47	0.802604	0.99907	ko04520	g10070;g10172;g3800;g5335	K04501+K05691+K05696+K04392
Organismal Systems	Development	Dorso-ventral axis formation	3	37	0.812651	0.99907	ko04320	g4067;g4841;g9612	K03102+K02098+K02156
Organismal Systems	Nervous system	Long-term potentiation	3	37	0.812651	0.99907	ko04720	g2295;g4301;g5118	K04958+K04373+K05858
Metabolism	Global and Overview	Metabolic pathways	97	909	0.815646	0.99907	ko01100	g10006;g10030;g10031;g10104;g10140;g10173;g10455;g10601;g1194;g1365;g1718;g175;g1972;g2004;g2025;g213;g214;g2479;g2635;g2723;g3112;g3135;g3318;g3362;g3454;g3466;g3526;g3564;g3628;g384;g3886;g4145;g4317;g4368;g4369;g4849;g4850;g4952;g4973;g5025;g5088;g5118;g5195;g5545;g5608;g5627;g5651;g5730;g5866;g6041;g6303;g6345;g6385;g6388;g6475;g6489;g6719;g6754;g6756;g6760;g6893;g6919;g7029;g7181;g72;g7270;g…	K00629+K00718+K09680+K01106+K13711+K02153+K01950+K20278+K00728+K01874+K02155+K00710+K14085+K15376+K00700+K00547+K00547+K03434+K00248+K00162+K01934+K00294+K01008+K03419+K07151+K08074+K09673+K00953+K00128+K00923+K01069+K01183+K10258+K02148+K00772+K01952+K01204+K22913+K01784+K04716+K01922+K05858+K00873+K04097+K03934+K12667+K01110+K18081+K12353+K00864+K00888+K01937+K00726+K03953+K00058+K18082+K03857+…
Environmental Information Processing	Signal transduction	Hedgehog signaling pathway - fly	2	26	0.815712	0.99907	ko04341	g10112;g3447	K08957+K20245
Organismal Systems	Nervous system	Dopaminergic synapse	6	69	0.817709	0.99907	ko04728	g2295;g3094;g3477;g3914;g5118;g6899	K04958+K10396+K04456+K02223+K05858+K04441
Metabolism	Carbohydrate metabolism	Butanoate metabolism	1	14	0.817938	0.99907	ko00650	g2635	K00248
Human Diseases	Infectious diseases	Bacterial invasion of epithelial cells	3	38	0.826873	0.99907	ko05100	g10172;g103;g5335	K05691+K04646+K04392
Metabolism	Global and Overview	Biosynthesis of amino acids	4	49	0.828429	0.99907	ko01230	g5195;g6475;g8959;g9109	K00873+K00058+K01647+K01758
Organismal Systems	Nervous system	Synaptic vesicle cycle	5	60	0.832798	0.99907	ko04721	g10173;g103;g1718;g1794;g4368	K02153+K04646+K02155+K11824+K02148
Metabolism	Global and Overview	2-Oxocarboxylic acid metabolism	1	15	0.83884	0.99907	ko01210	g8959	K01647
Environmental Information Processing	Signaling molecules and interaction	Cytokine-cytokine receptor interaction	1	15	0.83884	0.99907	ko04060	g8801	K04675
Metabolism	Metabolism of terpenoids and polyketides	Terpenoid backbone biosynthesis	2	28	0.847087	0.99907	ko00900	g1310;g6836	K05955+K00587
Organismal Systems	Endocrine system	Prolactin signaling pathway	2	28	0.847087	0.99907	ko04917	g3477;g6899	K04456+K04441
Organismal Systems	Endocrine system	Regulation of lipolysis in adipocyte	2	28	0.847087	0.99907	ko04923	g3477;g4844	K04456+K13699
Human Diseases	Cancers	Prostate cancer	3	40	0.852562	0.99907	ko05215	g3384;g3477;g5651	K07203+K04456+K01110
Genetic Information Processing	Replication and repair	Fanconi anemia pathway	2	29	0.860885	0.99907	ko03460	g2929;g8362	K08775+K06640
Metabolism	Global and Overview	Fatty acid metabolism	4	52	0.861865	0.99907	ko01212	g2005;g2635;g4317;g7528	K08765+K00248+K10258+K00665
Organismal Systems	Digestive system	Gastric acid secretion	3	41	0.864117	0.99907	ko04971	g2295;g2855;g5118	K04958+K13855+K05858
Metabolism	Energy metabolism	Oxidative phosphorylation	7	85	0.869792	0.99907	ko00190	g10173;g1718;g4368;g5471;g5608;g6388;g8381	K02153+K02155+K02148+K11726+K03934+K03953+K02133
Organismal Systems	Nervous system	Long-term depression	2	30	0.873536	0.99907	ko04730	g2295;g5118	K04958+K05858
Metabolism	Lipid metabolism	Arachidonic acid metabolism	1	17	0.873734	0.99907	ko00590	g5545	K04097
Environmental Information Processing	Signal transduction	Hippo signaling pathway - multiple species	1	17	0.873734	0.99907	ko04392	g5351	K16685
Organismal Systems	Development	Axon guidance	5	65	0.880507	0.99907	ko04360	g1192;g1965;g2670;g5335;g8365	K17388+K07526+K04352+K04392+K06766
Environmental Information Processing	Signal transduction	Hippo signaling pathway -fly	4	54	0.88093	0.99907	ko04391	g2882;g5351;g5485;g8196	K06094+K16685+K16175+K16675
Human Diseases	Infectious diseases	Hepatitis B	4	54	0.88093	0.99907	ko05161	g10070;g1902;g3477;g6899	K04501+K04398+K04456+K04441
Human Diseases	Cancers	Choline metabolism in cancer	4	54	0.88093	0.99907	ko05231	g3384;g3477;g5335;g5831	K07203+K04456+K04392+K04688
Cellular Processes	Cell motility	Regulation of actin cytoskeleton	6	76	0.882015	0.99907	ko04810	g1192;g1631;g2854;g5335;g710;g7629	K17388+K05749+K04367+K04392+K13710+K00921
Genetic Information Processing	Folding, sorting and degradation	Protein export	1	18	0.888242	0.99907	ko03060	g6752	K10956
Human Diseases	Infectious diseases	Leishmaniasis	1	18	0.888242	0.99907	ko05140	g6899	K04441
Organismal Systems	Excretory system	Vasopressin-regulated water reabsorption	2	32	0.89572	0.99907	ko04962	g6888;g749	K10418+K10413
Organismal Systems	Immune system	Chemokine signaling pathway	4	56	0.897674	0.99907	ko04062	g1192;g3477;g5118;g5335	K17388+K04456+K05858+K04392
Metabolism	Xenobiotics biodegradation and metabolism	Drug metabolism - cytochrome P450	1	19	0.901087	0.99907	ko00982	g5545	K04097
Environmental Information Processing	Signal transduction	NF-kappa B signaling pathway	1	19	0.901087	0.99907	ko04064	g654	K24070
Metabolism	Xenobiotics biodegradation and metabolism	Metabolism of xenobiotics by cytochrome P450	1	20	0.912459	0.99907	ko00980	g5545	K04097
Environmental Information Processing	Signal transduction	Ras signaling pathway	6	81	0.915264	0.99907	ko04014	g1991;g2670;g3477;g3478;g5335;g5793	K12380+K04352+K04456+K17637+K04392+K18529
Organismal Systems	Immune system	T cell receptor signaling pathway	2	35	0.922302	0.99907	ko04660	g3477;g6899	K04456+K04441
Metabolism	Carbohydrate metabolism	Fructose and mannose metabolism	1	21	0.922526	0.99907	ko00051	g8643	K00966
Metabolism	Metabolism of cofactors and vitamins	Folate biosynthesis	1	21	0.922526	0.99907	ko00790	g2004	K15376
Organismal Systems	Immune system	Th1 and Th2 cell differentiation	1	21	0.922526	0.99907	ko04658	g6899	K04441
Environmental Information Processing	Signal transduction	PI3K-Akt signaling pathway	8	105	0.926537	0.99907	ko04151	g2774;g2976;g3384;g3477;g5335;g5651;g5831;g9203	K07204+K05635+K07203+K04456+K04392+K01110+K04688+K07298
Human Diseases	Infectious diseases	Amoebiasis	2	36	0.929646	0.99907	ko05146	g2976;g5118	K05635+K05858
Organismal Systems	Sensory system	Inflammatory mediator regulation of TRP channels	3	49	0.931179	0.99907	ko04750	g2295;g5118;g6899	K04958+K05858+K04441
Genetic Information Processing	Folding, sorting and degradation	SNARE interactions in vesicular transport	1	22	0.931438	0.99907	ko04130	g3408	K08492
Organismal Systems	Immune system	Natural killer cell mediated cytotoxicity	1	22	0.931438	0.99907	ko04650	g5335	K04392
Human Diseases	Cancers	Non-small cell lung cancer	1	22	0.931438	0.99907	ko05223	g3477	K04456
Human Diseases	Cancers	Transcriptional misregulation in cancers	4	62	0.936123	0.99907	ko05202	g3125;g7270;g7475;g8574	K12823+K11424+K06067+K11253
Metabolism	Metabolism of other amino acids	Glutathione metabolism	2	37	0.936332	0.99907	ko00480	g5545;g95	K04097+K21456
Organismal Systems	Digestive system	Salivary secretion	3	50	0.936983	0.99907	ko04970	g2295;g2855;g5118	K04958+K13855+K05858
Organismal Systems	Endocrine system	Oxytocin signaling pathway	5	74	0.937518	0.99907	ko04921	g1192;g1881;g2295;g4340;g5118	K17388+K07200+K04958+K03234+K05858
Metabolism	Metabolism of terpenoids and polyketides	Insect hormone biosynthesis	1	23	0.939328	0.99907	ko00981	g3628	K00128
Genetic Information Processing	Transcription	RNA polymerase	1	23	0.939328	0.99907	ko03020	g8873	K03010
Organismal Systems	Nervous system	Retrograde endocannabinoid signaling	5	75	0.942042	0.99907	ko04723	g2295;g5118;g5608;g6388;g6899	K04958+K05858+K03934+K03953+K04441
Metabolism	Xenobiotics biodegradation and metabolism	Drug metabolism - other enzymes	2	38	0.942413	0.99907	ko00983	g6893;g7181	K00106+K00106
Human Diseases	Infectious diseases	Measles	2	38	0.942413	0.99907	ko05162	g1902;g3477	K04398+K04456
Metabolism	Carbohydrate metabolism	Pentose phosphate pathway	1	24	0.946311	0.99907	ko00030	g6754	K01053
Metabolism	Lipid metabolism	Fatty acid elongation	1	24	0.946311	0.99907	ko00062	g4317	K10258
Cellular Processes	Cellular commiunity	Gap junction	3	52	0.947259	0.99907	ko04540	g2295;g5118;g5470	K04958+K05858+K07374
Organismal Systems	Endocrine system	GnRH signaling pathway	3	52	0.947259	0.99907	ko04912	g2295;g5118;g6899	K04958+K05858+K04441
Organismal Systems	Endocrine system	Renin secretion	2	39	0.94794	0.99907	ko04924	g2295;g5118	K04958+K05858
Human Diseases	Immune diseases	Systemic lupus erythematosus	1	25	0.952492	0.99907	ko05322	g8574	K11253
Metabolism	Amino acid metabolism	Alanine, aspartate and glutamate metabolism	1	26	0.957964	0.99907	ko00250	g3135	K00294
Human Diseases	Infectious diseases	Pertussis	1	26	0.957964	0.99907	ko05133	g6899	K04441
Organismal Systems	Digestive system	Pancreatic secretion	4	68	0.960997	0.99907	ko04972	g2295;g2855;g5118;g5335	K04958+K13855+K05858+K04392
Environmental Information Processing	Signaling molecules and interaction	Cell adhesion molecules (CAMs)	1	27	0.962806	0.99907	ko04514	g8365	K06766
Metabolism	Lipid metabolism	Biosynthesis of unsaturated fatty acids	1	28	0.967092	0.99907	ko01040	g4317	K10258
Human Diseases	Infectious diseases	HTLV-I infection	7	106	0.967405	0.99907	ko05166	g10070;g1226;g3477;g5651;g6572;g8362;g9853	K04501+K03354+K04456+K01110+K06679+K06640+K03348
Organismal Systems	Nervous system	Serotonergic synapse	2	44	0.968787	0.99907	ko04726	g2295;g5118	K04958+K05858
Environmental Information Processing	Signal transduction	cGMP - PKG signaling pathway	5	83	0.968857	0.99907	ko04022	g1192;g2295;g3477;g5118;g698	K17388+K04958+K04456+K05858+K09565
Metabolism	Nucleotide metabolism	Purine metabolism	5	84	0.97125	0.99907	ko00230	g4849;g5195;g6756;g6893;g7181	K01952+K00873+K01239+K00106+K00106
Environmental Information Processing	Signal transduction	cAMP signaling pathway	7	108	0.97177	0.99907	ko04024	g1192;g3419;g3420;g3477;g3485;g3486;g5335	K17388+K05673+K05673+K04456+K05673+K05673+K04392
Organismal Systems	Immune system	Toll and Imd signaling pathway	2	45	0.971859	0.99907	ko04624	g1902;g6899	K04398+K04441
Organismal Systems	Circulatory system	Vascular smooth muscle contraction	3	59	0.972199	0.99907	ko04270	g1192;g2295;g5118	K17388+K04958+K05858
Organismal Systems	Nervous system	Cholinergic synapse	3	59	0.972199	0.99907	ko04725	g2295;g3477;g5118	K04958+K04456+K05858
Environmental Information Processing	Signal transduction	Rap1 signaling pathway	4	74	0.976638	0.99907	ko04015	g3477;g5118;g5335;g6899	K04456+K05858+K04392+K04441
Organismal Systems	Endocrine system	Estrogen signaling pathway	3	61	0.97695	0.99907	ko04915	g2295;g3477;g5118	K04958+K04456+K05858
Human Diseases	Infectious diseases	Hepatitis C	2	47	0.977152	0.99907	ko05160	g1902;g3477	K04398+K04456
Metabolism	Carbohydrate metabolism	Propanoate metabolism	1	32	0.979842	0.99907	ko00640	g2635	K00248
Organismal Systems	Sensory system	Olfactory transduction	1	32	0.979842	0.99907	ko04740	g699	K13752
Environmental Information Processing	Signal transduction	Phospholipase D signaling pathway	3	64	0.982657	0.99907	ko04072	g3384;g3477;g5118	K07203+K04456+K05858
Organismal Systems	Nervous system	Glutamatergic synapse	2	50	0.983332	0.99907	ko04724	g2295;g5118	K04958+K05858
Environmental Information Processing	Signaling molecules and interaction	ECM-receptor interaction	1	34	0.984226	0.99907	ko04512	g2976	K05635
Metabolism	Nucleotide metabolism	Pyrimidine metabolism	1	35	0.986047	0.99907	ko00240	g6345	K01937
Organismal Systems	Endocrine system	Melanogenesis	2	53	0.987877	0.99907	ko04916	g5118;g9548	K05858+K02353
Human Diseases	Cardiovascular diseases	Arrhythmogenic right ventricular cardiomyopathy (ARVC)	1	38	0.990346	0.99907	ko05412	g10172	K05691
Human Diseases	Neurodegenerative diseases	Parkinson's disease	4	88	0.993361	0.99907	ko05012	g5608;g6388;g698;g8381	K03934+K03953+K09565+K02133
Organismal Systems	Environmental adaptation	Circadian entrainment	2	59	0.993638	0.99907	ko04713	g2295;g5118	K04958+K05858
Organismal Systems	Circulatory system	Adrenergic signaling in cardiomyocytes	3	75	0.99407	0.99907	ko04261	g3477;g5118;g6899	K04456+K05858+K04441
Human Diseases	Substance dependence	Amphetamine addiction	1	44	0.995383	0.99907	ko05031	g7475	K06067
Environmental Information Processing	Signal transduction	Calcium signaling pathway	3	80	0.996408	0.99907	ko04020	g2295;g5118;g698	K04958+K05858+K09565
Organismal Systems	Nervous system	GABAergic synapse	1	47	0.996808	0.99907	ko04727	g2004	K15376
Organismal Systems	Endocrine system	Aldosterone synthesis and secretion	2	68	0.997623	0.99907	ko04925	g2295;g5118	K04958+K05858
Human Diseases	Substance dependence	Alcoholism	2	73	0.998635	0.99907	ko05034	g7475;g8574	K06067+K11253
Organismal Systems	Digestive system	Protein digestion and absorption	1	56	0.998948	0.99907	ko04974	g4473	K06519
Organismal Systems	Endocrine system	Insulin secretion	1	57	0.99907	0.99907	ko04911	g5118	K05858
Human Diseases	Cardiovascular diseases	Hypertrophic cardiomyopathy (HCM)	1	57	0.99907	0.99907	ko05410	g1881	K07200
