# Supplementary material for: Roles of DNA Methylation in Color Alternation of Eastern Honey Bees (Apis cerana) Induced by the Royal Jelly of Western Honey Bees (Apis mellifera)
Source: Int J Mol Sci. 2024 Mar 16;25(6):3368. doi: 10.3390/ijms25063368 (PMC10969989; doi:10.3390/ijms25063368)
Supplement: Supplementary file 1 [file ijms-25-03368-s001.zip › Table S6.xlsx]

## Sheet: Sheet1
Table S6 Top 20 KEGG pathways
KEGG_A_class	KEGG_B_class	Pathway	ACQ-VS-NCQ (404)	All (3533)	Pvalue	Qvalue	Pathway ID	Genes	K_IDs
Genetic Information Processing	Translation	mRNA surveillance pathway	18	63	0.000148681	0.0257476	ko03015	g10465;g1752;g1761;g2111;g2521;g3281;g3342;g3356;g3411;g3482;g5113;g6074;g7159;g7160;g7940;g8064;g8299;g873	K14284+K14398+K11125+K14401+K14400+K13917+K03267+K12882+K14326+K06100+K14323+K11124+K14407+K14407+K14404+K14328+K08873+K14376
Metabolism	Carbohydrate metabolism	Inositol phosphate metabolism	15	48	0.00017757	0.0257476	ko00562	g10104;g10140;g10601;g384;g4952;g5118;g5651;g5730;g6303;g6489;g7629;g765;g9167;g9173;g9820	K01106+K13711+K20278+K00923+K22913+K05858+K01110+K18081+K00888+K18082+K00921+K20279+K19801+K01099+K21798
Environmental Information Processing	Signal transduction	Phosphatidylinositol signaling system	15	57	0.00135464	0.130949	ko04070	g10104;g10140;g10601;g2295;g384;g5118;g5651;g5730;g6303;g6489;g7629;g765;g9167;g9173;g9820	K01106+K13711+K20278+K04958+K00923+K05858+K01110+K18081+K00888+K18082+K00921+K20279+K19801+K01099+K21798
Genetic Information Processing	Replication and repair	Homologous recombination	9	27	0.00217071	0.157376	ko03440	g10255;g1713;g2929;g3874;g3903;g4829;g5794;g6028;g9793	K10683+K02327+K08775+K02328+K02328+K10881+K11864+K20773+K10875
Genetic Information Processing	Translation	RNA transport	23	122	0.00971786	0.528474	ko03013	g10226;g10378;g10465;g1631;g1717;g1893;g1985;g3356;g3411;g3427;g3453;g5113;g5196;g5752;g588;g5970;g655;g6670;g6771;g6917;g7781;g8064;g8764	K15516+K03242+K14284+K05749+K03260+K03260+K14318+K12882+K14326+K14300+K14310+K14323+K03236+K14317+K14312+K14523+K03246+K12879+K03252+K03257+K12172+K14328+K03253
Metabolism	Biosynthesis of other secondary metabolites	Caffeine metabolism	2	2	0.0130473	0.528474	ko00232	g6893;g7181	K00106+K00106
Metabolism	Metabolism of other amino acids	Selenocompound metabolism	4	9	0.0132715	0.528474	ko00450	g1365;g3318;g9109;g9852	K01874+K01008+K01758+K03341
Environmental Information Processing	Signal transduction	mTOR signaling pathway	16	82	0.0210973	0.644263	ko04150	g10648;g2774;g3384;g3477;g3627;g4301;g4368;g4473;g5651;g5831;g5871;g6979;g7727;g9203;g9548;g9807	K20401+K07204+K07203+K04456+K20408+K04373+K02148+K06519+K01110+K04688+K10421+K03068+K15728+K07298+K02353+K20396
Genetic Information Processing	Folding, sorting and degradation	Protein processing in endoplasmic reticulum	21	117	0.0223454	0.644263	ko04141	g10261;g2131;g2270;g2674;g3454;g4215;g4366;g4545;g5627;g5984;g6752;g6815;g7028;g7029;g758;g760;g807;g8233;g9198;g9994;g9995	K14007+K14014+K07765+K10950+K07151+K14000+K08653+K10601+K12667+K14005+K10956+K14018+K10636+K12668+K10100+K08056+K05546+K08852+K14007+K04426+K04426
Genetic Information Processing	Translation	Ribosome biogenesis in eukaryotes	14	70	0.024557	0.644263	ko03008	g10465;g2319;g3183;g41;g4793;g5251;g5763;g5970;g6204;g6621;g6842;g7736;g8607;g9782	K14284+K14563+K14550+K14570+K11128+K14554+K03685+K14523+K11131+K14572+K12618+K14569+K14571+K14560
Human Diseases	Drug resistance	Antifolate resistance	5	16	0.028596	0.644263	ko01523	g3419;g3420;g3485;g3486;g5467	K05673+K05673+K05673+K05673+K05665
Cellular Processes	Transport and catabolism	Regulation of autophagy	16	85	0.0288807	0.644263	ko04140	g1008;g10246;g1362;g2295;g2774;g3384;g3477;g4417;g4576;g4739;g5651;g5831;g6489;g8233;g8766;g9203	K08333+K17908+K08803+K04958+K07204+K07203+K04456+K07874+K17906+K10802+K01110+K04688+K18082+K08852+K11248+K07298
Genetic Information Processing	Replication and repair	Base excision repair	6	22	0.0326115	0.675524	ko03410	g1713;g3874;g3903;g4739;g654;g7866	K02327+K02328+K02328+K10802+K24070+K02324
Human Diseases	Endocrine and metabolic diseases	Insulin resistance	11	54	0.0386496	0.747226	ko04931	g10303;g10343;g1221;g1881;g2005;g3384;g3477;g3800;g4301;g5651;g5831	K08745+K08745+K07197+K07200+K08765+K07203+K04456+K05696+K04373+K01110+K04688
Environmental Information Processing	Signal transduction	Sphingolipid signaling pathway	10	49	0.046924	0.800468	ko04071	g1192;g3477;g5025;g5118;g5335;g5467;g5651;g6899;g9994;g9995	K17388+K04456+K04716+K05858+K04392+K05665+K01110+K04441+K04426+K04426
Genetic Information Processing	Folding, sorting and degradation	RNA degradation	12	63	0.0501099	0.807327	ko03018	g10537;g10553;g1309;g1464;g2853;g294;g3343;g3945;g5673;g5674;g6842;g719	K12591+K12606+K04043+K03514+K12624+K12614+K12585+K12604+K03679+K03679+K12618+K12617
Genetic Information Processing	Folding, sorting and degradation	Ubiquitin mediated proteolysis	15	87	0.0659495	0.988982	ko04120	g1226;g1398;g1834;g3422;g4433;g4545;g4680;g496;g502;g5393;g6340;g752;g7915;g8430;g9853	K03354+K10587+K10571+K10593+K10590+K10601+K10586+K10260+K10596+K10686+K10592+K16061+K10685+K03870+K03348
Human Diseases	Neurodegenerative diseases	Amyotrophic lateral sclerosis (ALS)	6	26	0.0682057	0.988982	ko05014	g5335;g6899;g6982;g7709;g9994;g9995	K04392+K04441+K04575+K11518+K04426+K04426
Cellular Processes	Cell growth and death	Apoptosis	10	54	0.0819993	0.99907	ko04210	g1902;g2295;g3477;g4695;g5470;g654;g8233;g9113;g9994;g9995	K04398+K04958+K04456+K01373+K07374+K24070+K08852+K07611+K04426+K04426
Cellular Processes	Transport and catabolism	Autophagy - other eukaryotes	5	22	0.0977612	0.99907	ko04136	g1008;g10246;g2774;g3384;g4576	K08333+K17908+K07204+K07203+K17906
