# Supplementary material for: Roles of DNA Methylation in Color Alternation of Eastern Honey Bees (Apis cerana) Induced by the Royal Jelly of Western Honey Bees (Apis mellifera)
Source: Int J Mol Sci. 2024 Mar 16;25(6):3368. doi: 10.3390/ijms25063368 (PMC10969989; doi:10.3390/ijms25063368)
Supplement: Supplementary file 1 [file ijms-25-03368-s001.zip › Table S7.xlsx]

## Sheet: Sheet1
Table S7 Candidate key DMGs involved in four key pathways
Tryptophan metabolism
chr	start	end	strand	Log 2	pvalue	qvalue	meth.diff	GeneID	position	Symbol	Description	KEGG_A_class	KEGG_B_class	Pathway	K_ID	GO Component	GO Function	GO Process
LG02	16268701	16268900	*	-66.4939	9.62358e-21	1.40044e-17	-27.0388	g1972	Upstream	ALDH7A1	XP_016914288.1 alpha-aminoadipic semialdehyde dehydrogenase [Apis cerana]	Metabolism;Metabolism;Metabolism;Metabolism;Metabolism;Metabolism;Metabolism;Metabolism;Metabolism;Metabolism;Metabolism;Metabolism;Metabolism	Global and overview maps;Carbohydrate metabolism;Amino acid metabolism;Lipid metabolism;Carbohydrate metabolism;Amino acid metabolism;Amino acid metabolism;Amino acid metabolism;Metabolism of other amino acids;Lipid metabolism;Amino acid metabolism;Carbohydrate metabolism;Amino acid metabolism	ko01100//Metabolic pathways;ko00010//Glycolysis / Gluconeogenesis;ko00310//Lysine degradation;ko00561//Glycerolipid metabolism;ko00620//Pyruvate metabolism;ko00280//Valine, leucine and isoleucine degradation;ko00260//Glycine, serine and threonine metabolism;ko00330//Arginine and proline metabolism;ko00410//beta-Alanine metabolism;ko00071//Fatty acid degradation;ko00380//Tryptophan metabolism;ko00…	K14085;K14085;K14085;K14085;K14085;K14085;K14085;K14085;K14085;K14085;K14085;K14085;K14085	GO:0005575//cellular_component;GO:0005622//intracellular;GO:0005623//cell;GO:0005634//nucleus;GO:0005737//cytoplasm;GO:0005739//mitochondrion;GO:0005759//mitochondrial matrix;GO:0005829//cytosol;GO:0031974//membrane-enclosed lumen;GO:0043226//organelle;GO:0043227//membrane-bounded organelle;GO:0043229//intracellular organelle;GO:0043231//intracellular membrane-bounded organelle;GO:0043233//organe…	GO:0003674//molecular_function;GO:0003824//catalytic activity;GO:0003842//1-pyrroline-5-carboxylate dehydrogenase activity;GO:0004029//aldehyde dehydrogenase (NAD) activity;GO:0004043//L-aminoadipate-semialdehyde dehydrogenase activity;GO:0004350//glutamate-5-semialdehyde dehydrogenase activity;GO:0004491//methylmalonate-semialdehyde dehydrogenase (acylating) activity;GO:0004777//succinate-semial…	GO:0001101//response to acid chemical;GO:0001505//regulation of neurotransmitter levels;GO:0003008//system process;GO:0006081//cellular aldehyde metabolic process;GO:0006082//organic acid metabolic process;GO:0006520//cellular amino acid metabolic process;GO:0006527//arginine catabolic process;GO:0006553//lysine metabolic process;GO:0006554//lysine catabolic process;GO:0006561//proline biosynthet…
LG02	16268801	16269000	*	-89.4742	1.16301e-27	3.91232e-24	-31.2601	g1972	Upstream	ALDH7A1	XP_016914288.1 alpha-aminoadipic semialdehyde dehydrogenase [Apis cerana]	Metabolism;Metabolism;Metabolism;Metabolism;Metabolism;Metabolism;Metabolism;Metabolism;Metabolism;Metabolism;Metabolism;Metabolism;Metabolism	Global and overview maps;Carbohydrate metabolism;Amino acid metabolism;Lipid metabolism;Carbohydrate metabolism;Amino acid metabolism;Amino acid metabolism;Amino acid metabolism;Metabolism of other amino acids;Lipid metabolism;Amino acid metabolism;Carbohydrate metabolism;Amino acid metabolism	ko01100//Metabolic pathways;ko00010//Glycolysis / Gluconeogenesis;ko00310//Lysine degradation;ko00561//Glycerolipid metabolism;ko00620//Pyruvate metabolism;ko00280//Valine, leucine and isoleucine degradation;ko00260//Glycine, serine and threonine metabolism;ko00330//Arginine and proline metabolism;ko00410//beta-Alanine metabolism;ko00071//Fatty acid degradation;ko00380//Tryptophan metabolism;ko00…	K14085;K14085;K14085;K14085;K14085;K14085;K14085;K14085;K14085;K14085;K14085;K14085;K14085	GO:0005575//cellular_component;GO:0005622//intracellular;GO:0005623//cell;GO:0005634//nucleus;GO:0005737//cytoplasm;GO:0005739//mitochondrion;GO:0005759//mitochondrial matrix;GO:0005829//cytosol;GO:0031974//membrane-enclosed lumen;GO:0043226//organelle;GO:0043227//membrane-bounded organelle;GO:0043229//intracellular organelle;GO:0043231//intracellular membrane-bounded organelle;GO:0043233//organe…	GO:0003674//molecular_function;GO:0003824//catalytic activity;GO:0003842//1-pyrroline-5-carboxylate dehydrogenase activity;GO:0004029//aldehyde dehydrogenase (NAD) activity;GO:0004043//L-aminoadipate-semialdehyde dehydrogenase activity;GO:0004350//glutamate-5-semialdehyde dehydrogenase activity;GO:0004491//methylmalonate-semialdehyde dehydrogenase (acylating) activity;GO:0004777//succinate-semial…	GO:0001101//response to acid chemical;GO:0001505//regulation of neurotransmitter levels;GO:0003008//system process;GO:0006081//cellular aldehyde metabolic process;GO:0006082//organic acid metabolic process;GO:0006520//cellular amino acid metabolic process;GO:0006527//arginine catabolic process;GO:0006553//lysine metabolic process;GO:0006554//lysine catabolic process;GO:0006561//proline biosynthet…
LG05	1525701	1525900	*	-46.3187	1.13945e-14	7.28717e-12	27.2275	g3628	Downstream	ALDH2	PBC31442.1 Aldehyde dehydrogenase [Apis cerana cerana]	Metabolism;Metabolism;Metabolism;Metabolism;Metabolism;Metabolism;Metabolism;Metabolism;Metabolism;Metabolism;Metabolism;Metabolism;Metabolism	Global and overview maps;Carbohydrate metabolism;Amino acid metabolism;Lipid metabolism;Carbohydrate metabolism;Amino acid metabolism;Amino acid metabolism;Metabolism of other amino acids;Lipid metabolism;Metabolism of terpenoids and polyketides;Amino acid metabolism;Carbohydrate metabolism;Amino acid metabolism	ko01100//Metabolic pathways;ko00010//Glycolysis / Gluconeogenesis;ko00310//Lysine degradation;ko00561//Glycerolipid metabolism;ko00620//Pyruvate metabolism;ko00280//Valine, leucine and isoleucine degradation;ko00330//Arginine and proline metabolism;ko00410//beta-Alanine metabolism;ko00071//Fatty acid degradation;ko00981//Insect hormone biosynthesis;ko00380//Tryptophan metabolism;ko00053//Ascorbat…	..	GO:0005575//cellular_component;GO:0005622//intracellular;GO:0005623//cell;GO:0005737//cytoplasm;GO:0005739//mitochondrion;GO:0005759//mitochondrial matrix;GO:0031974//membrane-enclosed lumen;GO:0043226//organelle;GO:0043227//membrane-bounded organelle;GO:0043229//intracellular organelle;GO:0043231//intracellular membrane-bounded organelle;GO:0043233//organelle lumen;GO:0044422//organelle part;GO:…	GO:0003674//molecular_function;GO:0003824//catalytic activity;GO:0003842//1-pyrroline-5-carboxylate dehydrogenase activity;GO:0004029//aldehyde dehydrogenase (NAD) activity;GO:0004491//methylmalonate-semialdehyde dehydrogenase (acylating) activity;GO:0004777//succinate-semialdehyde dehydrogenase (NAD+) activity;GO:0008774//acetaldehyde dehydrogenase (acetylating) activity;GO:0008802//betaine-alde…	GO:0006081//cellular aldehyde metabolic process;GO:0006082//organic acid metabolic process;GO:0006090//pyruvate metabolic process;GO:0006117//acetaldehyde metabolic process;GO:0006527//arginine catabolic process;GO:0006562//proline catabolic process;GO:0006574//valine catabolic process;GO:0006578//amino-acid betaine biosynthetic process;GO:0008150//biological_process;GO:0008152//metabolic process…
LG11	2374501	2374700	*	-41.9022	2.43327e-13	1.27221e-10	36.3994	g7752	Genebody	OGDH	PBC28616.1 2-oxoglutarate dehydrogenase [Apis cerana cerana]	Metabolism;Metabolism;Metabolism	Global and overview maps;Global and overview maps;Carbohydrate metabolism	ko01100//Metabolic pathways;ko01200//Carbon metabolism;ko00020//Citrate cycle (TCA cycle)	K00164;K00164;K00164	GO:0005575//cellular_component;GO:0005622//intracellular;GO:0005623//cell;GO:0005737//cytoplasm;GO:0005739//mitochondrion;GO:0005740//mitochondrial envelope;GO:0005759//mitochondrial matrix;GO:0005947//mitochondrial alpha-ketoglutarate dehydrogenase complex;GO:0009353//mitochondrial oxoglutarate dehydrogenase complex;GO:0016020//membrane;GO:0030062//mitochondrial tricarboxylic acid cycle enzyme c…	GO:0003674//molecular_function;GO:0003824//catalytic activity;GO:0004591//oxoglutarate dehydrogenase (succinyl-transferring) activity;GO:0004739//pyruvate dehydrogenase (acetyl-transferring) activity;GO:0005488//binding;GO:0016491//oxidoreductase activity;GO:0016624//oxidoreductase activity, acting on the aldehyde or oxo group of donors, disulfide as acceptor;GO:0016903//oxidoreductase activity, …	GO:0005975//carbohydrate metabolic process;GO:0006082//organic acid metabolic process;GO:0006086//acetyl-CoA biosynthetic process from pyruvate;GO:0006090//pyruvate metabolic process;GO:0006091//generation of precursor metabolites and energy;GO:0006096//glycolytic process;GO:0006099//tricarboxylic acid cycle;GO:0006101//citrate metabolic process;GO:0006139//nucleobase-containing compound metaboli…
LG13	10497001	10497200	*	-101.959	2.02853e-31	1.02261e-27	-44.9306	g9239	Genebody	T05H10.6	PBC25441.1 pyruvate dehydrogenase E1 component subunit alpha [Apis cerana cerana]	Metabolism;Metabolism;Organismal Systems;Environmental Information Processing;Metabolism;Human Diseases;Metabolism;Metabolism	Global and overview maps;Global and overview maps;Endocrine system;Signal transduction;Carbohydrate metabolism;Cancers;Carbohydrate metabolism;Carbohydrate metabolism	ko01100//Metabolic pathways;ko01200//Carbon metabolism;ko04922//Glucagon signaling pathway;ko04066//HIF-1 signaling pathway;ko00010//Glycolysis / Gluconeogenesis;ko05230//Central carbon metabolism in cancer;ko00020//Citrate cycle (TCA cycle);ko00620//Pyruvate metabolism	K00161;K00161;K00161;K00161;K00161;K00161;K00161;K00161	GO:0005575//cellular_component;GO:0005622//intracellular;GO:0005623//cell;GO:0005634//nucleus;GO:0005730//nucleolus;GO:0005737//cytoplasm;GO:0005739//mitochondrion;GO:0005759//mitochondrial matrix;GO:0005967//mitochondrial pyruvate dehydrogenase complex;GO:0009295//nucleoid;GO:0031974//membrane-enclosed lumen;GO:0031981//nuclear lumen;GO:0032991//macromolecular complex;GO:0042645//mitochondrial n…	GO:0003674//molecular_function;GO:0003824//catalytic activity;GO:0004591//oxoglutarate dehydrogenase (succinyl-transferring) activity;GO:0004738//pyruvate dehydrogenase activity;GO:0004739//pyruvate dehydrogenase (acetyl-transferring) activity;GO:0008661//1-deoxy-D-xylulose-5-phosphate synthase activity;GO:0016491//oxidoreductase activity;GO:0016620//oxidoreductase activity, acting on the aldehyd…	GO:0005975//carbohydrate metabolic process;GO:0005996//monosaccharide metabolic process;GO:0006006//glucose metabolic process;GO:0006082//organic acid metabolic process;GO:0006084//acetyl-CoA metabolic process;GO:0006085//acetyl-CoA biosynthetic process;GO:0006086//acetyl-CoA biosynthetic process from pyruvate;GO:0006090//pyruvate metabolic process;GO:0006091//generation of precursor metabolites …
LG13	10497001	10497200	*	-101.959	2.02853e-31	1.02261e-27	-44.9306	g9239	Downstream	T05H10.6	PBC25441.1 pyruvate dehydrogenase E1 component subunit alpha [Apis cerana cerana]	Metabolism;Metabolism;Organismal Systems;Environmental Information Processing;Metabolism;Human Diseases;Metabolism;Metabolism	Global and overview maps;Global and overview maps;Endocrine system;Signal transduction;Carbohydrate metabolism;Cancers;Carbohydrate metabolism;Carbohydrate metabolism	ko01100//Metabolic pathways;ko01200//Carbon metabolism;ko04922//Glucagon signaling pathway;ko04066//HIF-1 signaling pathway;ko00010//Glycolysis / Gluconeogenesis;ko05230//Central carbon metabolism in cancer;ko00020//Citrate cycle (TCA cycle);ko00620//Pyruvate metabolism	K00161;K00161;K00161;K00161;K00161;K00161;K00161;K00161	GO:0005575//cellular_component;GO:0005622//intracellular;GO:0005623//cell;GO:0005634//nucleus;GO:0005730//nucleolus;GO:0005737//cytoplasm;GO:0005739//mitochondrion;GO:0005759//mitochondrial matrix;GO:0005967//mitochondrial pyruvate dehydrogenase complex;GO:0009295//nucleoid;GO:0031974//membrane-enclosed lumen;GO:0031981//nuclear lumen;GO:0032991//macromolecular complex;GO:0042645//mitochondrial n…	GO:0003674//molecular_function;GO:0003824//catalytic activity;GO:0004591//oxoglutarate dehydrogenase (succinyl-transferring) activity;GO:0004738//pyruvate dehydrogenase activity;GO:0004739//pyruvate dehydrogenase (acetyl-transferring) activity;GO:0008661//1-deoxy-D-xylulose-5-phosphate synthase activity;GO:0016491//oxidoreductase activity;GO:0016620//oxidoreductase activity, acting on the aldehyd…	GO:0005975//carbohydrate metabolic process;GO:0005996//monosaccharide metabolic process;GO:0006006//glucose metabolic process;GO:0006082//organic acid metabolic process;GO:0006084//acetyl-CoA metabolic process;GO:0006085//acetyl-CoA biosynthetic process;GO:0006086//acetyl-CoA biosynthetic process from pyruvate;GO:0006090//pyruvate metabolic process;GO:0006091//generation of precursor metabolites …
LG15	5642901	5643100	*	-74.0339	5.17098e-23	9.76137e-20	25.8629	g9995	Downstream	Map3k15	XP_016909832.1 mitogen-activated protein kinase kinase kinase 15 isoform X1 [Apis cerana]	Human Diseases;Human Diseases;Organismal Systems;Genetic Information Processing;Environmental Information Processing;Environmental Information Processing;Human Diseases;Cellular Processes;Organismal Systems;Cellular Processes;Human Diseases;Cellular Processes;Environmental Information Processing;Human Diseases;Environmental Information Processing;Human Diseases;Human Diseases	Neurodegenerative diseases;Neurodegenerative diseases;Environmental adaptation;Folding, sorting and degradation;Signal transduction;Signal transduction;Endocrine and metabolic diseases;Cellular community - eukaryotes;Nervous system;Cell growth and death;Cardiovascular diseases;Cell growth and death;Signal transduction;Neurodegenerative disease;Signal transduction;Drug resistance;Neurodegenerative…	ko05016//Huntington disease;ko05010//Alzheimer disease;ko04714//Thermogenesis;ko04141//Protein processing in endoplasmic reticulum;ko04010//MAPK signaling pathway;ko04013//MAPK signaling pathway - fly;ko04932//Non-alcoholic fatty liver disease (NAFLD);ko04530//Tight junction;ko04722//Neurotrophin signaling pathway;ko04210//Apoptosis;ko05418//Fluid shear stress and atherosclerosis;ko04214//Apoptos…	K04426;K04426;K04426;K04426;K04426;K04426;K04426;K04426;K04426;K04426;K04426;K04426;K04426;K04426;K04426;K04426;K04426	GO:0005575//cellular_component;GO:0005622//intracellular;GO:0005623//cell;GO:0005737//cytoplasm;GO:0014069//postsynaptic density;GO:0030424//axon;GO:0032279//asymmetric synapse;GO:0032838//cell projection cytoplasm;GO:0032991//macromolecular complex;GO:0033267//axon part;GO:0036477//somatodendritic compartment;GO:0042995//cell projection;GO:0043005//neuron projection;GO:0043025//neuronal cell bod…	GO:0000166//nucleotide binding;GO:0003674//molecular_function;GO:0003824//catalytic activity;GO:0004061//arylformamidase activity;GO:0004672//protein kinase activity;GO:0004674//protein serine/threonine kinase activity;GO:0004709//MAP kinase kinase kinase activity;GO:0005488//binding;GO:0005515//protein binding;GO:0005524//ATP binding;GO:0008144//drug binding;GO:0016301//kinase activity;GO:001674…	GO:0000003//reproduction;GO:0000165//MAPK cascade;GO:0000186//activation of MAPKK activity;GO:0000187//activation of MAPK activity;GO:0001932//regulation of protein phosphorylation;GO:0001934//positive regulation of protein phosphorylation;GO:0002225//positive regulation of antimicrobial peptide production;GO:0002376//immune system process;GO:0002682//regulation of immune system process;GO:000268…
LG11	494001	494200	*	-96.9374	6.59077e-30	2.82129e-26	-52.718	g7612	Downstream	get1	PBC27554.1 Tryptophan-rich protein [Apis cerana cerana]	-	-	-	-	GO:0000139//Golgi membrane;GO:0005575//cellular_component;GO:0005622//intracellular;GO:0005623//cell;GO:0005634//nucleus;GO:0005737//cytoplasm;GO:0005783//endoplasmic reticulum;GO:0005789//endoplasmic reticulum membrane;GO:0005794//Golgi apparatus;GO:0005829//cytosol;GO:0005840//ribosome;GO:0005886//plasma membrane;GO:0012505//endomembrane system;GO:0015935//small ribosomal subunit;GO:0016020//me…	GO:0003674//molecular_function;GO:0003735//structural constituent of ribosome;GO:0005198//structural molecule activity;GO:0022857//transmembrane transporter activity	GO:0000003//reproduction;GO:0001654//eye development;GO:0002181//cytoplasmic translation;GO:0003006//developmental process involved in reproduction;GO:0006412//translation;GO:0006464//cellular protein modification process;GO:0006486//protein glycosylation;GO:0006518//peptide metabolic process;GO:0006807//nitrogen compound metabolic process;GO:0006810//transport;GO:0006873//cellular ion homeostasi…
LG10	5848601	5848800	*	-65.3979	2.05718e-20	2.85434e-17	37.7299	g7181	Genebody	XDH	XP_026298538.1 xanthine dehydrogenase isoform X1 [Apis mellifera]	Metabolism;Metabolism;Cellular Processes;Metabolism;Metabolism	Global and overview maps;Nucleotide metabolism;Transport and catabolism;Xenobiotics biodegradation and metabolism;Biosynthesis of other secondary metabolites	ko01100//Metabolic pathways;ko00230//Purine metabolism;ko04146//Peroxisome;ko00983//Drug metabolism - other enzymes;ko00232//Caffeine metabolism	K00106;K00106;K00106;K00106;K00106	GO:0005575//cellular_component;GO:0005622//intracellular;GO:0005623//cell;GO:0005737//cytoplasm;GO:0005777//peroxisome;GO:0005829//cytosol;GO:0042579//microbody;GO:0043226//organelle;GO:0043227//membrane-bounded organelle;GO:0043229//intracellular organelle;GO:0043231//intracellular membrane-bounded organelle;GO:0044424//intracellular part;GO:0044444//cytoplasmic part;GO:0044464//cell part	GO:0000166//nucleotide binding;GO:0003674//molecular_function;GO:0003676//nucleic acid binding;GO:0003824//catalytic activity;GO:0004854//xanthine dehydrogenase activity;GO:0004855//xanthine oxidase activity;GO:0005488//binding;GO:0005506//iron ion binding;GO:0009055//electron carrier activity;GO:0016491//oxidoreductase activity;GO:0016614//oxidoreductase activity, acting on CH-OH group of donors…	GO:0006082//organic acid metabolic process;GO:0006091//generation of precursor metabolites and energy;GO:0006139//nucleobase-containing compound metabolic process;GO:0006144//purine nucleobase metabolic process;GO:0006145//purine nucleobase catabolic process;GO:0006206//pyrimidine nucleobase metabolic process;GO:0006520//cellular amino acid metabolic process;GO:0006525//arginine metabolic process…
Tyrosine
chr	start	end	strand	Log 2	pvalue	qvalue	meth.diff	GeneID	position	Symbol	Description	KEGG_A_class	KEGG_B_class	Pathway	K_ID	GO Component	GO Function	GO Process
LG04	14017901	14018100	*	-100.997	3.95209e-31	1.92076e-27	37.1402	g3384	Genebody	MTOR	XP_016909071.1 serine/threonine-protein kinase mTOR [Apis cerana]	Human Diseases;Human Diseases;Human Diseases;Organismal Systems;Human Diseases;Human Diseases;Environmental Information Processing;Human Diseases;Human Diseases;Organismal Systems;Cellular Processes;Environmental Information Processing;Human Diseases;Human Diseases;Organismal Systems;Cellular Processes;Human Diseases;Human Diseases;Environmental Information Processing;Organismal Systems;Environme…	Neurodegenerative diseases;Neurodegenerative diseases;Cancers;Environmental adaptation;Infectious diseases;Infectious diseases;Signal transduction;Infectious diseases;Cancers;Development and regeneration;Transport and catabolism;Signal transduction;Infectious diseases;Infectious disease: viral;Endocrine system;Cell growth and death;Cancers;Cancers;Signal transduction;Endocrine system;Signal trans…	ko05016//Huntington disease;ko05010//Alzheimer disease;ko05200//Pathways in cancer;ko04714//Thermogenesis;ko05165//Human papillomavirus infection;ko05131//Shigellosis;ko04151//PI3K-Akt signaling pathway;ko05168//Herpes simplex infection;ko05205//Proteoglycans in cancer;ko04361//Axon regeneration;ko04140//Autophagy - animal;ko04150//mTOR signaling pathway;ko05163//Human cytomegalovirus infection;k…	K07203;K07203;K07203;K07203;K07203;K07203;K07203;K07203;K07203;K07203;K07203;K07203;K07203;K07203;K07203;K07203;K07203;K07203;K07203;K07203;K07203;K07203;K07203;K07203;K07203;K07203;K07203;K07203;K07203;K07203;K07203;K07203;K07203;K07203;K07203;K07203;K07203;K07203;K07203;K07203;K07203;K07203;K07203;K07203;K07203;K07203;K07203;K07203	GO:0000139//Golgi membrane;GO:0000323//lytic vacuole;GO:0005575//cellular_component;GO:0005622//intracellular;GO:0005623//cell;GO:0005634//nucleus;GO:0005654//nucleoplasm;GO:0005737//cytoplasm;GO:0005739//mitochondrion;GO:0005740//mitochondrial envelope;GO:0005741//mitochondrial outer membrane;GO:0005764//lysosome;GO:0005773//vacuole;GO:0005783//endoplasmic reticulum;GO:0005789//endoplasmic retic…	GO:0000166//nucleotide binding;GO:0000182//rDNA binding;GO:0001016//RNA polymerase III regulatory region DNA binding;GO:0001025//RNA polymerase III transcription factor binding;GO:0001030//RNA polymerase III type 1 promoter DNA binding;GO:0001031//RNA polymerase III type 2 promoter DNA binding;GO:0001032//RNA polymerase III type 3 promoter DNA binding;GO:0001067//regulatory region nucleic acid bi…	GO:0000003//reproduction;GO:0000491//small nucleolar ribonucleoprotein complex assembly;GO:0000492//box C/D snoRNP assembly;GO:0000768//syncytium formation by plasma membrane fusion;GO:0000902//cell morphogenesis;GO:0000904//cell morphogenesis involved in differentiation;GO:0001101//response to acid chemical;GO:0001505//regulation of neurotransmitter levels;GO:0001558//regulation of cell growth;G…
LG04	14018001	14018200	*	-81.4416	3.04531e-25	7.31938e-22	38.3657	g3384	Genebody	MTOR	XP_016909071.1 serine/threonine-protein kinase mTOR [Apis cerana]	Human Diseases;Human Diseases;Human Diseases;Organismal Systems;Human Diseases;Human Diseases;Environmental Information Processing;Human Diseases;Human Diseases;Organismal Systems;Cellular Processes;Environmental Information Processing;Human Diseases;Human Diseases;Organismal Systems;Cellular Processes;Human Diseases;Human Diseases;Environmental Information Processing;Organismal Systems;Environme…	Neurodegenerative diseases;Neurodegenerative diseases;Cancers;Environmental adaptation;Infectious diseases;Infectious diseases;Signal transduction;Infectious diseases;Cancers;Development and regeneration;Transport and catabolism;Signal transduction;Infectious diseases;Infectious disease: viral;Endocrine system;Cell growth and death;Cancers;Cancers;Signal transduction;Endocrine system;Signal trans…	ko05016//Huntington disease;ko05010//Alzheimer disease;ko05200//Pathways in cancer;ko04714//Thermogenesis;ko05165//Human papillomavirus infection;ko05131//Shigellosis;ko04151//PI3K-Akt signaling pathway;ko05168//Herpes simplex infection;ko05205//Proteoglycans in cancer;ko04361//Axon regeneration;ko04140//Autophagy - animal;ko04150//mTOR signaling pathway;ko05163//Human cytomegalovirus infection;k…	K07203;K07203;K07203;K07203;K07203;K07203;K07203;K07203;K07203;K07203;K07203;K07203;K07203;K07203;K07203;K07203;K07203;K07203;K07203;K07203;K07203;K07203;K07203;K07203;K07203;K07203;K07203;K07203;K07203;K07203;K07203;K07203;K07203;K07203;K07203;K07203;K07203;K07203;K07203;K07203;K07203;K07203;K07203;K07203;K07203;K07203;K07203;K07203	GO:0000139//Golgi membrane;GO:0000323//lytic vacuole;GO:0005575//cellular_component;GO:0005622//intracellular;GO:0005623//cell;GO:0005634//nucleus;GO:0005654//nucleoplasm;GO:0005737//cytoplasm;GO:0005739//mitochondrion;GO:0005740//mitochondrial envelope;GO:0005741//mitochondrial outer membrane;GO:0005764//lysosome;GO:0005773//vacuole;GO:0005783//endoplasmic reticulum;GO:0005789//endoplasmic retic…	GO:0000166//nucleotide binding;GO:0000182//rDNA binding;GO:0001016//RNA polymerase III regulatory region DNA binding;GO:0001025//RNA polymerase III transcription factor binding;GO:0001030//RNA polymerase III type 1 promoter DNA binding;GO:0001031//RNA polymerase III type 2 promoter DNA binding;GO:0001032//RNA polymerase III type 3 promoter DNA binding;GO:0001067//regulatory region nucleic acid bi…	GO:0000003//reproduction;GO:0000491//small nucleolar ribonucleoprotein complex assembly;GO:0000492//box C/D snoRNP assembly;GO:0000768//syncytium formation by plasma membrane fusion;GO:0000902//cell morphogenesis;GO:0000904//cell morphogenesis involved in differentiation;GO:0001101//response to acid chemical;GO:0001505//regulation of neurotransmitter levels;GO:0001558//regulation of cell growth;G…
LG04	14020101	14020300	*	-29.5077	1.31009e-09	3.59524e-07	25.5122	g3384	Genebody	MTOR	XP_016909071.1 serine/threonine-protein kinase mTOR [Apis cerana]	Human Diseases;Human Diseases;Human Diseases;Organismal Systems;Human Diseases;Human Diseases;Environmental Information Processing;Human Diseases;Human Diseases;Organismal Systems;Cellular Processes;Environmental Information Processing;Human Diseases;Human Diseases;Organismal Systems;Cellular Processes;Human Diseases;Human Diseases;Environmental Information Processing;Organismal Systems;Environme…	Neurodegenerative diseases;Neurodegenerative diseases;Cancers;Environmental adaptation;Infectious diseases;Infectious diseases;Signal transduction;Infectious diseases;Cancers;Development and regeneration;Transport and catabolism;Signal transduction;Infectious diseases;Infectious disease: viral;Endocrine system;Cell growth and death;Cancers;Cancers;Signal transduction;Endocrine system;Signal trans…	ko05016//Huntington disease;ko05010//Alzheimer disease;ko05200//Pathways in cancer;ko04714//Thermogenesis;ko05165//Human papillomavirus infection;ko05131//Shigellosis;ko04151//PI3K-Akt signaling pathway;ko05168//Herpes simplex infection;ko05205//Proteoglycans in cancer;ko04361//Axon regeneration;ko04140//Autophagy - animal;ko04150//mTOR signaling pathway;ko05163//Human cytomegalovirus infection;k…	K07203;K07203;K07203;K07203;K07203;K07203;K07203;K07203;K07203;K07203;K07203;K07203;K07203;K07203;K07203;K07203;K07203;K07203;K07203;K07203;K07203;K07203;K07203;K07203;K07203;K07203;K07203;K07203;K07203;K07203;K07203;K07203;K07203;K07203;K07203;K07203;K07203;K07203;K07203;K07203;K07203;K07203;K07203;K07203;K07203;K07203;K07203;K07203	GO:0000139//Golgi membrane;GO:0000323//lytic vacuole;GO:0005575//cellular_component;GO:0005622//intracellular;GO:0005623//cell;GO:0005634//nucleus;GO:0005654//nucleoplasm;GO:0005737//cytoplasm;GO:0005739//mitochondrion;GO:0005740//mitochondrial envelope;GO:0005741//mitochondrial outer membrane;GO:0005764//lysosome;GO:0005773//vacuole;GO:0005783//endoplasmic reticulum;GO:0005789//endoplasmic retic…	GO:0000166//nucleotide binding;GO:0000182//rDNA binding;GO:0001016//RNA polymerase III regulatory region DNA binding;GO:0001025//RNA polymerase III transcription factor binding;GO:0001030//RNA polymerase III type 1 promoter DNA binding;GO:0001031//RNA polymerase III type 2 promoter DNA binding;GO:0001032//RNA polymerase III type 3 promoter DNA binding;GO:0001067//regulatory region nucleic acid bi…	GO:0000003//reproduction;GO:0000491//small nucleolar ribonucleoprotein complex assembly;GO:0000492//box C/D snoRNP assembly;GO:0000768//syncytium formation by plasma membrane fusion;GO:0000902//cell morphogenesis;GO:0000904//cell morphogenesis involved in differentiation;GO:0001101//response to acid chemical;GO:0001505//regulation of neurotransmitter levels;GO:0001558//regulation of cell growth;G…
LG04	14021501	14021700	*	-35.9778	1.47776e-11	5.77439e-09	-29.2635	g3384	Genebody	MTOR	XP_016909071.1 serine/threonine-protein kinase mTOR [Apis cerana]	Human Diseases;Human Diseases;Human Diseases;Organismal Systems;Human Diseases;Human Diseases;Environmental Information Processing;Human Diseases;Human Diseases;Organismal Systems;Cellular Processes;Environmental Information Processing;Human Diseases;Human Diseases;Organismal Systems;Cellular Processes;Human Diseases;Human Diseases;Environmental Information Processing;Organismal Systems;Environme…	Neurodegenerative diseases;Neurodegenerative diseases;Cancers;Environmental adaptation;Infectious diseases;Infectious diseases;Signal transduction;Infectious diseases;Cancers;Development and regeneration;Transport and catabolism;Signal transduction;Infectious diseases;Infectious disease: viral;Endocrine system;Cell growth and death;Cancers;Cancers;Signal transduction;Endocrine system;Signal trans…	ko05016//Huntington disease;ko05010//Alzheimer disease;ko05200//Pathways in cancer;ko04714//Thermogenesis;ko05165//Human papillomavirus infection;ko05131//Shigellosis;ko04151//PI3K-Akt signaling pathway;ko05168//Herpes simplex infection;ko05205//Proteoglycans in cancer;ko04361//Axon regeneration;ko04140//Autophagy - animal;ko04150//mTOR signaling pathway;ko05163//Human cytomegalovirus infection;k…	K07203;K07203;K07203;K07203;K07203;K07203;K07203;K07203;K07203;K07203;K07203;K07203;K07203;K07203;K07203;K07203;K07203;K07203;K07203;K07203;K07203;K07203;K07203;K07203;K07203;K07203;K07203;K07203;K07203;K07203;K07203;K07203;K07203;K07203;K07203;K07203;K07203;K07203;K07203;K07203;K07203;K07203;K07203;K07203;K07203;K07203;K07203;K07203	GO:0000139//Golgi membrane;GO:0000323//lytic vacuole;GO:0005575//cellular_component;GO:0005622//intracellular;GO:0005623//cell;GO:0005634//nucleus;GO:0005654//nucleoplasm;GO:0005737//cytoplasm;GO:0005739//mitochondrion;GO:0005740//mitochondrial envelope;GO:0005741//mitochondrial outer membrane;GO:0005764//lysosome;GO:0005773//vacuole;GO:0005783//endoplasmic reticulum;GO:0005789//endoplasmic retic…	GO:0000166//nucleotide binding;GO:0000182//rDNA binding;GO:0001016//RNA polymerase III regulatory region DNA binding;GO:0001025//RNA polymerase III transcription factor binding;GO:0001030//RNA polymerase III type 1 promoter DNA binding;GO:0001031//RNA polymerase III type 2 promoter DNA binding;GO:0001032//RNA polymerase III type 3 promoter DNA binding;GO:0001067//regulatory region nucleic acid bi…	GO:0000003//reproduction;GO:0000491//small nucleolar ribonucleoprotein complex assembly;GO:0000492//box C/D snoRNP assembly;GO:0000768//syncytium formation by plasma membrane fusion;GO:0000902//cell morphogenesis;GO:0000904//cell morphogenesis involved in differentiation;GO:0001101//response to acid chemical;GO:0001505//regulation of neurotransmitter levels;GO:0001558//regulation of cell growth;G…
LG04	14593001	14593200	*	-51.8889	2.39815e-16	1.93808e-13	33.0998	g3455	Genebody	PTPN23	PBC32547.1 Tyrosine-protein phosphatase non-receptor type [Apis cerana cerana]	-	-	-	-	GO:0000815//ESCRT III complex;GO:0005575//cellular_component;GO:0005622//intracellular;GO:0005623//cell;GO:0005634//nucleus;GO:0005654//nucleoplasm;GO:0005737//cytoplasm;GO:0005768//endosome;GO:0005769//early endosome;GO:0005815//microtubule organizing center;GO:0005829//cytosol;GO:0005856//cytoskeleton;GO:0005929//cilium;GO:0010008//endosome membrane;GO:0012505//endomembrane system;GO:0015630//m…	GO:0003674//molecular_function;GO:0003824//catalytic activity;GO:0004721//phosphoprotein phosphatase activity;GO:0004725//protein tyrosine phosphatase activity;GO:0005488//binding;GO:0005515//protein binding;GO:0008047//enzyme activator activity;GO:0016504//peptidase activator activity;GO:0016787//hydrolase activity;GO:0016788//hydrolase activity, acting on ester bonds;GO:0016791//phosphatase act…	GO:0000003//reproduction;GO:0000226//microtubule cytoskeleton organization;GO:0002064//epithelial cell development;GO:0002065//columnar/cuboidal epithelial cell differentiation;GO:0002066//columnar/cuboidal epithelial cell development;GO:0002376//immune system process;GO:0002440//production of molecular mediator of immune response;GO:0002775//antimicrobial peptide production;GO:0002791//regulatio…
LG08	1543801	1544000	*	-116.274	9.95808e-36	7.92751e-32	-50.5877	g5651	Genebody	PTEN	XP_028522909.1 phosphatidylinositol 3,4,5-trisphosphate 3-phosphatase and dual-specificity protein phosphatase PTEN isoform X1 [Apis cerana]	Metabolism;Human Diseases;Human Diseases;Human Diseases;Environmental Information Processing;Organismal Systems;Cellular Processes;Environmental Information Processing;Cellular Processes;Cellular Processes;Human Diseases;Human Diseases;Organismal Systems;Environmental Information Processing;Environmental Information Processing;Human Diseases;Human Diseases;Environmental Information Processing;Met…	Global and overview maps;Cancers;Infectious diseases;Infectious diseases;Signal transduction;Development and regeneration;Transport and catabolism;Signal transduction;Cellular community - eukaryotes;Cell growth and death;Cancers;Cancers;Aging;Signal transduction;Signal transduction;Endocrine and metabolic diseases;Cancers;Signal transduction;Carbohydrate metabolism;Cancers;Cancers;Cancers;Drug re…	ko01100//Metabolic pathways;ko05200//Pathways in cancer;ko05165//Human papillomavirus infection;ko05166//HTLV-I infection;ko04151//PI3K-Akt signaling pathway;ko04361//Axon regeneration;ko04140//Autophagy - animal;ko04150//mTOR signaling pathway;ko04510//Focal adhesion;ko04218//Cellular senescence;ko05206//MicroRNAs in cancer;ko05225//Hepatocellular carcinoma;ko04212//Longevity regulating pathway …	K01110;K01110;K01110;K01110;K01110;K01110;K01110;K01110;K01110;K01110;K01110;K01110;K01110;K01110;K01110;K01110;K01110;K01110;K01110;K01110;K01110;K01110;K01110;K01110;K01110;K01110;K01110;K01110	GO:0001931//uropod;GO:0005575//cellular_component;GO:0005576//extracellular region;GO:0005622//intracellular;GO:0005623//cell;GO:0005634//nucleus;GO:0005654//nucleoplasm;GO:0005737//cytoplasm;GO:0005739//mitochondrion;GO:0005829//cytosol;GO:0005886//plasma membrane;GO:0005938//cell cortex;GO:0009898//cytoplasmic side of plasma membrane;GO:0016020//membrane;GO:0016324//apical plasma membrane;GO:00…	GO:0002020//protease binding;GO:0003674//molecular_function;GO:0003779//actin binding;GO:0003824//catalytic activity;GO:0004438//phosphatidylinositol-3-phosphatase activity;GO:0004721//phosphoprotein phosphatase activity;GO:0004722//protein serine/threonine phosphatase activity;GO:0004725//protein tyrosine phosphatase activity;GO:0005102//receptor binding;GO:0005161//platelet-derived growth facto…	GO:0000003//reproduction;GO:0000079//regulation of cyclin-dependent protein serine/threonine kinase activity;GO:0000278//mitotic cell cycle;GO:0000281//mitotic cytokinesis;GO:0000902//cell morphogenesis;GO:0000904//cell morphogenesis involved in differentiation;GO:0000910//cytokinesis;GO:0001525//angiogenesis;GO:0001558//regulation of cell growth;GO:0001568//blood vessel development;GO:0001654//e…
LG08	4595701	4595900	*	-61.7103	2.65065e-19	3.18323e-16	28.7461	g5831	Genebody	RPS6KB1	XP_016906045.1 ribosomal protein S6 kinase beta-1 [Apis cerana]	Human Diseases;Organismal Systems;Human Diseases;Human Diseases;Environmental Information Processing;Human Diseases;Organismal Systems;Cellular Processes;Environmental Information Processing;Human Diseases;Human Diseases;Organismal Systems;Human Diseases;Environmental Information Processing;Environmental Information Processing;Organismal Systems;Organismal Systems;Human Diseases;Human Diseases;Hu…	Cancers;Environmental adaptation;Infectious diseases;Infectious diseases;Signal transduction;Cancers;Development and regeneration;Transport and catabolism;Signal transduction;Infectious diseases;Infectious disease: viral;Endocrine system;Cancers;Signal transduction;Signal transduction;Aging;Aging;Endocrine and metabolic diseases;Cancers;Cancers;Signal transduction;Cancers;Aging;Drug resistance;Ca…	ko05200//Pathways in cancer;ko04714//Thermogenesis;ko05165//Human papillomavirus infection;ko05131//Shigellosis;ko04151//PI3K-Akt signaling pathway;ko05205//Proteoglycans in cancer;ko04361//Axon regeneration;ko04140//Autophagy - animal;ko04150//mTOR signaling pathway;ko05163//Human cytomegalovirus infection;ko05170//Human immunodeficiency virus 1 infection;ko04910//Insulin signaling pathway;ko052…	K04688;K04688;K04688;K04688;K04688;K04688;K04688;K04688;K04688;K04688;K04688;K04688;K04688;K04688;K04688;K04688;K04688;K04688;K04688;K04688;K04688;K04688;K04688;K04688;K04688;K04688;K04688;K04688;K04688;K04688;K04688;K04688	-	GO:0004672//protein kinase activity;GO:0004674//protein serine/threonine kinase activity;GO:0005524//ATP binding	GO:0006468//protein phosphorylation
LG04	14777801	14778000	*	-82.8051	1.18356e-25	3.01782e-22	-32.1267	g3477	Downstream	Akt1	XP_006621574.1 RAC serine/threonine-protein kinase [Apis dorsata]	Human Diseases;Human Diseases;Human Diseases;Environmental Information Processing;Human Diseases;Human Diseases;Environmental Information Processing;Human Diseases;Human Diseases;Environmental Information Processing;Human Diseases;Human Diseases;Cellular Processes;Environmental Information Processing;Environmental Information Processing;Human Diseases;Environmental Information Processing;Human Di…	Neurodegenerative diseases;Cancers;Infectious diseases;Signal transduction;Infectious diseases;Infectious diseases;Signal transduction;Infectious diseases;Infectious diseases;Signal transduction;Cancers;Endocrine and metabolic diseases;Transport and catabolism;Signal transduction;Signal transduction;Infectious diseases;Signal transduction;Infectious disease: viral;Cellular community - eukaryotes;…	ko05010//Alzheimer disease;ko05200//Pathways in cancer;ko05165//Human papillomavirus infection;ko04024//cAMP signaling pathway;ko05131//Shigellosis;ko05166//HTLV-I infection;ko04151//PI3K-Akt signaling pathway;ko05132//Salmonella infection;ko05168//Herpes simplex infection;ko04010//MAPK signaling pathway;ko05205//Proteoglycans in cancer;ko04932//Non-alcoholic fatty liver disease (NAFLD);ko04140//…	K04456;K04456;K04456;K04456;K04456;K04456;K04456;K04456;K04456;K04456;K04456;K04456;K04456;K04456;K04456;K04456;K04456;K04456;K04456;K04456;K04456;K04456;K04456;K04456;K04456;K04456;K04456;K04456;K04456;K04456;K04456;K04456;K04456;K04456;K04456;K04456;K04456;K04456;K04456;K04456;K04456;K04456;K04456;K04456;K04456;K04456;K04456;K04456;K04456;K04456;K04456;K04456;K04456;K04456;K04456;K04456;K04456;…	GO:0005575//cellular_component;GO:0005622//intracellular;GO:0005623//cell;GO:0005634//nucleus;GO:0005737//cytoplasm;GO:0005829//cytosol;GO:0005938//cell cortex;GO:0036477//somatodendritic compartment;GO:0043025//neuronal cell body;GO:0043226//organelle;GO:0043227//membrane-bounded organelle;GO:0043229//intracellular organelle;GO:0043231//intracellular membrane-bounded organelle;GO:0044297//cell b…	GO:0000166//nucleotide binding;GO:0003674//molecular_function;GO:0003824//catalytic activity;GO:0004672//protein kinase activity;GO:0004674//protein serine/threonine kinase activity;GO:0005488//binding;GO:0005515//protein binding;GO:0005524//ATP binding;GO:0005543//phospholipid binding;GO:0008144//drug binding;GO:0008289//lipid binding;GO:0016301//kinase activity;GO:0016740//transferase activity;…	GO:0000003//reproduction;GO:0000768//syncytium formation by plasma membrane fusion;GO:0001558//regulation of cell growth;GO:0001667//ameboidal-type cell migration;GO:0002682//regulation of immune system process;GO:0002791//regulation of peptide secretion;GO:0002792//negative regulation of peptide secretion;GO:0003006//developmental process involved in reproduction;GO:0006464//cellular protein mod…
LG04	14778301	14778500	*	-63.462	7.8709e-20	1.01005e-16	34.612	g3477	Downstream	Akt1	XP_006621574.1 RAC serine/threonine-protein kinase [Apis dorsata]	Human Diseases;Human Diseases;Human Diseases;Environmental Information Processing;Human Diseases;Human Diseases;Environmental Information Processing;Human Diseases;Human Diseases;Environmental Information Processing;Human Diseases;Human Diseases;Cellular Processes;Environmental Information Processing;Environmental Information Processing;Human Diseases;Environmental Information Processing;Human Di…	Neurodegenerative diseases;Cancers;Infectious diseases;Signal transduction;Infectious diseases;Infectious diseases;Signal transduction;Infectious diseases;Infectious diseases;Signal transduction;Cancers;Endocrine and metabolic diseases;Transport and catabolism;Signal transduction;Signal transduction;Infectious diseases;Signal transduction;Infectious disease: viral;Cellular community - eukaryotes;…	ko05010//Alzheimer disease;ko05200//Pathways in cancer;ko05165//Human papillomavirus infection;ko04024//cAMP signaling pathway;ko05131//Shigellosis;ko05166//HTLV-I infection;ko04151//PI3K-Akt signaling pathway;ko05132//Salmonella infection;ko05168//Herpes simplex infection;ko04010//MAPK signaling pathway;ko05205//Proteoglycans in cancer;ko04932//Non-alcoholic fatty liver disease (NAFLD);ko04140//…	K04456;K04456;K04456;K04456;K04456;K04456;K04456;K04456;K04456;K04456;K04456;K04456;K04456;K04456;K04456;K04456;K04456;K04456;K04456;K04456;K04456;K04456;K04456;K04456;K04456;K04456;K04456;K04456;K04456;K04456;K04456;K04456;K04456;K04456;K04456;K04456;K04456;K04456;K04456;K04456;K04456;K04456;K04456;K04456;K04456;K04456;K04456;K04456;K04456;K04456;K04456;K04456;K04456;K04456;K04456;K04456;K04456;…	GO:0005575//cellular_component;GO:0005622//intracellular;GO:0005623//cell;GO:0005634//nucleus;GO:0005737//cytoplasm;GO:0005829//cytosol;GO:0005938//cell cortex;GO:0036477//somatodendritic compartment;GO:0043025//neuronal cell body;GO:0043226//organelle;GO:0043227//membrane-bounded organelle;GO:0043229//intracellular organelle;GO:0043231//intracellular membrane-bounded organelle;GO:0044297//cell b…	GO:0000166//nucleotide binding;GO:0003674//molecular_function;GO:0003824//catalytic activity;GO:0004672//protein kinase activity;GO:0004674//protein serine/threonine kinase activity;GO:0005488//binding;GO:0005515//protein binding;GO:0005524//ATP binding;GO:0005543//phospholipid binding;GO:0008144//drug binding;GO:0008289//lipid binding;GO:0016301//kinase activity;GO:0016740//transferase activity;…	GO:0000003//reproduction;GO:0000768//syncytium formation by plasma membrane fusion;GO:0001558//regulation of cell growth;GO:0001667//ameboidal-type cell migration;GO:0002682//regulation of immune system process;GO:0002791//regulation of peptide secretion;GO:0002792//negative regulation of peptide secretion;GO:0003006//developmental process involved in reproduction;GO:0006464//cellular protein mod…
Dopamine
chr	start	end	strand	Log 2	pvalue	qvalue	meth.diff	GeneID	position	Symbol	Description	KEGG_A_class	KEGG_B_class	Pathway	K_ID	GO Component	GO Function	GO Process
LG01	10384501	10384700	*	-30.4931	6.61684e-10	1.92292e-07	27.2513	g521	Downstream	--	XP_016912329.1 uncharacterized protein LOC107997900 [Apis cerana]	-	-	-	-	GO:0005575//cellular_component;GO:0005622//intracellular;GO:0005623//cell;GO:0005737//cytoplasm;GO:0005829//cytosol;GO:0044424//intracellular part;GO:0044444//cytoplasmic part;GO:0044464//cell part	GO:0003674//molecular_function;GO:0003824//catalytic activity;GO:0003832//beta-alanyl-dopamine hydrolase activity;GO:0016787//hydrolase activity;GO:0031964//beta-alanyl-histamine hydrolase activity	GO:0001505//regulation of neurotransmitter levels;GO:0001692//histamine metabolic process;GO:0001694//histamine biosynthetic process;GO:0003008//system process;GO:0006576//cellular biogenic amine metabolic process;GO:0006584//catecholamine metabolic process;GO:0006725//cellular aromatic compound metabolic process;GO:0006807//nitrogen compound metabolic process;GO:0007275//multicellular organism d…		cell 305
LG03	9035001	9035200	*	-57.1887	6.08833e-18	6.09302e-15	28.4215	g2295	Downstream	Itpr	PBC34595.1 Inositol 1,4,5-trisphosphate receptor [Apis cerana cerana]	Human Diseases;Human Diseases;Human Diseases;Human Diseases;Cellular Processes;Environmental Information Processing;Human Diseases;Human Diseases;Human Diseases;Environmental Information Processing;Organismal Systems;Organismal Systems;Cellular Processes;Cellular Processes;Organismal Systems;Organismal Systems;Organismal Systems;Environmental Information Processing;Organismal Systems;Organismal S…	Neurodegenerative diseases;Neurodegenerative diseases;Infectious diseases;Cancers;Transport and catabolism;Signal transduction;Endocrine and metabolic diseases;Infectious diseases;Infectious disease: viral;Signal transduction;Nervous system;Endocrine system;Cell growth and death;Cell growth and death;Nervous system;Endocrine system;Digestive system;Signal transduction;Endocrine system;Endocrine s…	ko05016//Huntington disease;ko05010//Alzheimer disease;ko05131//Shigellosis;ko05205//Proteoglycans in cancer;ko04140//Autophagy - animal;ko04022//cGMP - PKG signaling pathway;ko04934//Cushing syndrome;ko05163//Human cytomegalovirus infection;ko05170//Human immunodeficiency virus 1 infection;ko04020//Calcium signaling pathway;ko04723//Retrograde endocannabinoid signaling;ko04921//Oxytocin signalin…	K04958;K04958;K04958;K04958;K04958;K04958;K04958;K04958;K04958;K04958;K04958;K04958;K04958;K04958;K04958;K04958;K04958;K04958;K04958;K04958;K04958;K04958;K04958;K04958;K04958;K04958;K04958;K04958;K04958;K04958;K04958;K04958;K04958;K04958;K04958;K04958;K04958;K04958;K04958;K04958;K04958;K04958;K04958;K04958;K04958;K04958	GO:0005575//cellular_component;GO:0005622//intracellular;GO:0005623//cell;GO:0005634//nucleus;GO:0005635//nuclear envelope;GO:0005637//nuclear inner membrane;GO:0005730//nucleolus;GO:0005737//cytoplasm;GO:0005783//endoplasmic reticulum;GO:0005789//endoplasmic reticulum membrane;GO:0005790//smooth endoplasmic reticulum;GO:0005791//rough endoplasmic reticulum;GO:0005886//plasma membrane;GO:0005955/…	GO:0003674//molecular_function;GO:0005215//transporter activity;GO:0005216//ion channel activity;GO:0005217//intracellular ligand-gated ion channel activity;GO:0005220//inositol 1,4,5-trisphosphate-sensitive calcium-release channel activity;GO:0005246//calcium channel regulator activity;GO:0005261//cation channel activity;GO:0005262//calcium channel activity;GO:0005488//binding;GO:0005509//calciu…	GO:0000003//reproduction;GO:0000280//nuclear division;GO:0001556//oocyte maturation;GO:0001666//response to hypoxia;GO:0001775//cell activation;GO:0002165//instar larval or pupal development;GO:0002791//regulation of peptide secretion;GO:0003006//developmental process involved in reproduction;GO:0003008//system process;GO:0003012//muscle system process;GO:0006810//transport;GO:0006811//ion transp…		cell 1422
LG04	14777801	14778000	*	-82.8051	1.18356e-25	3.01782e-22	-32.1267	g3477	Downstream	Akt1	XP_006621574.1 RAC serine/threonine-protein kinase [Apis dorsata]	Human Diseases;Human Diseases;Human Diseases;Environmental Information Processing;Human Diseases;Human Diseases;Environmental Information Processing;Human Diseases;Human Diseases;Environmental Information Processing;Human Diseases;Human Diseases;Cellular Processes;Environmental Information Processing;Environmental Information Processing;Human Diseases;Environmental Information Processing;Human Di…	Neurodegenerative diseases;Cancers;Infectious diseases;Signal transduction;Infectious diseases;Infectious diseases;Signal transduction;Infectious diseases;Infectious diseases;Signal transduction;Cancers;Endocrine and metabolic diseases;Transport and catabolism;Signal transduction;Signal transduction;Infectious diseases;Signal transduction;Infectious disease: viral;Cellular community - eukaryotes;…	ko05010//Alzheimer disease;ko05200//Pathways in cancer;ko05165//Human papillomavirus infection;ko04024//cAMP signaling pathway;ko05131//Shigellosis;ko05166//HTLV-I infection;ko04151//PI3K-Akt signaling pathway;ko05132//Salmonella infection;ko05168//Herpes simplex infection;ko04010//MAPK signaling pathway;ko05205//Proteoglycans in cancer;ko04932//Non-alcoholic fatty liver disease (NAFLD);ko04140//…	K04456;K04456;K04456;K04456;K04456;K04456;K04456;K04456;K04456;K04456;K04456;K04456;K04456;K04456;K04456;K04456;K04456;K04456;K04456;K04456;K04456;K04456;K04456;K04456;K04456;K04456;K04456;K04456;K04456;K04456;K04456;K04456;K04456;K04456;K04456;K04456;K04456;K04456;K04456;K04456;K04456;K04456;K04456;K04456;K04456;K04456;K04456;K04456;K04456;K04456;K04456;K04456;K04456;K04456;K04456;K04456;K04456;…	GO:0005575//cellular_component;GO:0005622//intracellular;GO:0005623//cell;GO:0005634//nucleus;GO:0005737//cytoplasm;GO:0005829//cytosol;GO:0005938//cell cortex;GO:0036477//somatodendritic compartment;GO:0043025//neuronal cell body;GO:0043226//organelle;GO:0043227//membrane-bounded organelle;GO:0043229//intracellular organelle;GO:0043231//intracellular membrane-bounded organelle;GO:0044297//cell b…	GO:0000166//nucleotide binding;GO:0003674//molecular_function;GO:0003824//catalytic activity;GO:0004672//protein kinase activity;GO:0004674//protein serine/threonine kinase activity;GO:0005488//binding;GO:0005515//protein binding;GO:0005524//ATP binding;GO:0005543//phospholipid binding;GO:0008144//drug binding;GO:0008289//lipid binding;GO:0016301//kinase activity;GO:0016740//transferase activity;…	GO:0000003//reproduction;GO:0000768//syncytium formation by plasma membrane fusion;GO:0001558//regulation of cell growth;GO:0001667//ameboidal-type cell migration;GO:0002682//regulation of immune system process;GO:0002791//regulation of peptide secretion;GO:0002792//negative regulation of peptide secretion;GO:0003006//developmental process involved in reproduction;GO:0006464//cellular protein mod…		cell 1501
LG05	6642001	6642200	*	-48.4157	2.66331e-15	1.84914e-12	-27.6943	g3914	Downstream	Npas2	PBC31589.1 Neuronal PAS domain-containing protein [Apis cerana cerana]	Organismal Systems;Organismal Systems;Organismal Systems	Nervous system;Environmental adaptation;Environmental adaptation	ko04728//Dopaminergic synapse;ko04710//Circadian rhythm;ko04711//Circadian rhythm - fly	K02223;K02223;K02223	-	GO:0004871//signal transducer activity;GO:0005515//protein binding	GO:0006355//regulation of transcription, DNA-templated;GO:0007165//signal transduction		cell 1529
LG06	9654701	9654900	*	-48.7422	2.12384e-15	1.50003e-12	-34.4316	g4584	Downstream	--	XP_016906734.1 G-protein coupled receptor 143-like [Apis cerana]	-	-	-	-	GO:0000323//lytic vacuole;GO:0005575//cellular_component;GO:0005622//intracellular;GO:0005623//cell;GO:0005737//cytoplasm;GO:0005764//lysosome;GO:0005765//lysosomal membrane;GO:0005773//vacuole;GO:0005774//vacuolar membrane;GO:0005794//Golgi apparatus;GO:0005886//plasma membrane;GO:0012505//endomembrane system;GO:0012506//vesicle membrane;GO:0016020//membrane;GO:0016021//integral component of mem…	GO:0001653//peptide receptor activity;GO:0003674//molecular_function;GO:0004888//transmembrane signaling receptor activity;GO:0004930//G-protein coupled receptor activity;GO:0005488//binding;GO:0008144//drug binding;GO:0008188//neuropeptide receptor activity;GO:0008528//G-protein coupled peptide receptor activity;GO:0016597//amino acid binding;GO:0031406//carboxylic acid binding;GO:0035240//dopam…	GO:0003008//system process;GO:0006726//eye pigment biosynthetic process;GO:0006810//transport;GO:0006996//organelle organization;GO:0007154//cell communication;GO:0007165//signal transduction;GO:0007186//G-protein coupled receptor signaling pathway;GO:0007218//neuropeptide signaling pathway;GO:0007600//sensory perception;GO:0007601//visual perception;GO:0008150//biological_process;GO:0008152//met…		cell 1536
LG03	9037101	9037300	*	-59.9294	9.10842e-19	1.02249e-15	-27.7559	g2295	Genebody	Itpr	PBC34595.1 Inositol 1,4,5-trisphosphate receptor [Apis cerana cerana]	Human Diseases;Human Diseases;Human Diseases;Human Diseases;Cellular Processes;Environmental Information Processing;Human Diseases;Human Diseases;Human Diseases;Environmental Information Processing;Organismal Systems;Organismal Systems;Cellular Processes;Cellular Processes;Organismal Systems;Organismal Systems;Organismal Systems;Environmental Information Processing;Organismal Systems;Organismal S…	Neurodegenerative diseases;Neurodegenerative diseases;Infectious diseases;Cancers;Transport and catabolism;Signal transduction;Endocrine and metabolic diseases;Infectious diseases;Infectious disease: viral;Signal transduction;Nervous system;Endocrine system;Cell growth and death;Cell growth and death;Nervous system;Endocrine system;Digestive system;Signal transduction;Endocrine system;Endocrine s…	ko05016//Huntington disease;ko05010//Alzheimer disease;ko05131//Shigellosis;ko05205//Proteoglycans in cancer;ko04140//Autophagy - animal;ko04022//cGMP - PKG signaling pathway;ko04934//Cushing syndrome;ko05163//Human cytomegalovirus infection;ko05170//Human immunodeficiency virus 1 infection;ko04020//Calcium signaling pathway;ko04723//Retrograde endocannabinoid signaling;ko04921//Oxytocin signalin…	K04958;K04958;K04958;K04958;K04958;K04958;K04958;K04958;K04958;K04958;K04958;K04958;K04958;K04958;K04958;K04958;K04958;K04958;K04958;K04958;K04958;K04958;K04958;K04958;K04958;K04958;K04958;K04958;K04958;K04958;K04958;K04958;K04958;K04958;K04958;K04958;K04958;K04958;K04958;K04958;K04958;K04958;K04958;K04958;K04958;K04958	GO:0005575//cellular_component;GO:0005622//intracellular;GO:0005623//cell;GO:0005634//nucleus;GO:0005635//nuclear envelope;GO:0005637//nuclear inner membrane;GO:0005730//nucleolus;GO:0005737//cytoplasm;GO:0005783//endoplasmic reticulum;GO:0005789//endoplasmic reticulum membrane;GO:0005790//smooth endoplasmic reticulum;GO:0005791//rough endoplasmic reticulum;GO:0005886//plasma membrane;GO:0005955/…	GO:0003674//molecular_function;GO:0005215//transporter activity;GO:0005216//ion channel activity;GO:0005217//intracellular ligand-gated ion channel activity;GO:0005220//inositol 1,4,5-trisphosphate-sensitive calcium-release channel activity;GO:0005246//calcium channel regulator activity;GO:0005261//cation channel activity;GO:0005262//calcium channel activity;GO:0005488//binding;GO:0005509//calciu…	GO:0000003//reproduction;GO:0000280//nuclear division;GO:0001556//oocyte maturation;GO:0001666//response to hypoxia;GO:0001775//cell activation;GO:0002165//instar larval or pupal development;GO:0002791//regulation of peptide secretion;GO:0003006//developmental process involved in reproduction;GO:0003008//system process;GO:0003012//muscle system process;GO:0006810//transport;GO:0006811//ion transp…		cell 253
LG04	9381701	9381900	*	-70.7843	4.91811e-22	8.27219e-19	32.8134	g3094	Genebody	Khc	PBC28924.1 Kinesin heavy chain [Apis cerana cerana]	Human Diseases;Human Diseases;Cellular Processes;Organismal Systems	Neurodegenerative diseases;Neurodegenerative diseases;Transport and catabolism;Nervous system	ko05016//Huntington disease;ko05010//Alzheimer disease;ko04144//Endocytosis;ko04728//Dopaminergic synapse	K10396;K10396;K10396;K10396	GO:0005575//cellular_component;GO:0005622//intracellular;GO:0005623//cell;GO:0005737//cytoplasm;GO:0005856//cytoskeleton;GO:0005871//kinesin complex;GO:0005874//microtubule;GO:0005875//microtubule associated complex;GO:0005881//cytoplasmic microtubule;GO:0005938//cell cortex;GO:0015629//actin cytoskeleton;GO:0015630//microtubule cytoskeleton;GO:0030424//axon;GO:0030478//actin cap;GO:0030863//cort…	GO:0000166//nucleotide binding;GO:0003674//molecular_function;GO:0003774//motor activity;GO:0003777//microtubule motor activity;GO:0003824//catalytic activity;GO:0005488//binding;GO:0005515//protein binding;GO:0005523//tropomyosin binding;GO:0005524//ATP binding;GO:0008017//microtubule binding;GO:0008092//cytoskeletal protein binding;GO:0008144//drug binding;GO:0008574//ATP-dependent microtubule …	GO:0000003//reproduction;GO:0000226//microtubule cytoskeleton organization;GO:0000301//retrograde transport, vesicle recycling within Golgi;GO:0000578//embryonic axis specification;GO:0000902//cell morphogenesis;GO:0000904//cell morphogenesis involved in differentiation;GO:0001654//eye development;GO:0001754//eye photoreceptor cell differentiation;GO:0002064//epithelial cell development;GO:000206…		cell 325
LG05	6639101	6639300	*	-43.936	5.942e-14	3.42982e-11	-25.4536	g3914	Genebody	Npas2	PBC31589.1 Neuronal PAS domain-containing protein [Apis cerana cerana]	Organismal Systems;Organismal Systems;Organismal Systems	Nervous system;Environmental adaptation;Environmental adaptation	ko04728//Dopaminergic synapse;ko04710//Circadian rhythm;ko04711//Circadian rhythm - fly	K02223;K02223;K02223	-	GO:0004871//signal transducer activity;GO:0005515//protein binding	GO:0006355//regulation of transcription, DNA-templated;GO:0007165//signal transduction		cell 485
LG07	1841201	1841400	*	-22.749	1.41858e-07	2.55455e-05	25.0602	g5118	Genebody	Plc21C	PBC29897.1 1-phosphatidylinositol-4,5-bisphosphate phosphodiesterase classes I and II [Apis cerana cerana]	Metabolism;Human Diseases;Human Diseases;Human Diseases;Human Diseases;Organismal Systems;Environmental Information Processing;Human Diseases;Human Diseases;Environmental Information Processing;Environmental Information Processing;Organismal Systems;Organismal Systems;Environmental Information Processing;Organismal Systems;Organismal Systems;Organismal Systems;Organismal Systems;Environmental Inf…	Global and overview maps;Neurodegenerative diseases;Neurodegenerative diseases;Cancers;Infectious diseases;Development and regeneration;Signal transduction;Endocrine and metabolic diseases;Infectious diseases;Signal transduction;Signal transduction;Circulatory system;Nervous system;Signal transduction;Endocrine system;Nervous system;Endocrine system;Digestive system;Signal transduction;Endocrine …	ko01100//Metabolic pathways;ko05016//Huntington disease;ko05010//Alzheimer disease;ko05200//Pathways in cancer;ko05131//Shigellosis;ko04361//Axon regeneration;ko04022//cGMP - PKG signaling pathway;ko04934//Cushing syndrome;ko05163//Human cytomegalovirus infection;ko04310//Wnt signaling pathway;ko04020//Calcium signaling pathway;ko04261//Adrenergic signaling in cardiomyocytes;ko04723//Retrograde e…	K05858;K05858;K05858;K05858;K05858;K05858;K05858;K05858;K05858;K05858;K05858;K05858;K05858;K05858;K05858;K05858;K05858;K05858;K05858;K05858;K05858;K05858;K05858;K05858;K05858;K05858;K05858;K05858;K05858;K05858;K05858;K05858;K05858;K05858;K05858;K05858;K05858;K05858;K05858;K05858;K05858;K05858;K05858;K05858;K05858;K05858;K05858;K05858;K05858;K05858;K05858;K05858;K05858;K05858;K05858;K05858;K05858;…	GO:0005575//cellular_component;GO:0005622//intracellular;GO:0005623//cell;GO:0044464//cell part	GO:0003674//molecular_function;GO:0003824//catalytic activity;GO:0004435//phosphatidylinositol phospholipase C activity;GO:0004620//phospholipase activity;GO:0004629//phospholipase C activity;GO:0005488//binding;GO:0005509//calcium ion binding;GO:0008081//phosphoric diester hydrolase activity;GO:0016298//lipase activity;GO:0016491//oxidoreductase activity;GO:0016787//hydrolase activity;GO:0016788…	GO:0006629//lipid metabolic process;GO:0007154//cell communication;GO:0007165//signal transduction;GO:0007610//behavior;GO:0007626//locomotory behavior;GO:0007629//flight behavior;GO:0008150//biological_process;GO:0008152//metabolic process;GO:0008344//adult locomotory behavior;GO:0009056//catabolic process;GO:0009314//response to radiation;GO:0009416//response to light stimulus;GO:0009605//respo…		cell 609
Phenylalanine
chr	start	end	strand	Log 2	pvalue	qvalue	meth.diff	GeneID	position	Symbol	Description	KEGG_A_class	KEGG_B_class	Pathway	K_ID	GO Component	GO Function	GO Process
LG07	11250601	11250800	*	-29.3035	1.50927e-09	4.09712e-07	-27.3092	g5545	Downstream	GstS1	XP_028521355.1 probable elongation factor 1-gamma 2 [Apis cerana]	Metabolism;Metabolism;Human Diseases;Metabolism;Metabolism;Metabolism	Global and overview maps;Metabolism of other amino acids;Cancers;Xenobiotics biodegradation and metabolism;Xenobiotics biodegradation and metabolism;Lipid metabolism	ko01100//Metabolic pathways;ko00480//Glutathione metabolism;ko05204//Chemical carcinogenesis;ko00980//Metabolism of xenobiotics by cytochrome P450;ko00982//Drug metabolism - cytochrome P450;ko00590//Arachidonic acid metabolism	K04097;K04097;K04097;K04097;K04097;K04097	GO:0001401//mitochondrial sorting and assembly machinery complex;GO:0005575//cellular_component;GO:0005622//intracellular;GO:0005623//cell;GO:0005737//cytoplasm;GO:0044424//intracellular part;GO:0044464//cell part	GO:0003674//molecular_function;GO:0003824//catalytic activity;GO:0004364//glutathione transferase activity;GO:0004601//peroxidase activity;GO:0004602//glutathione peroxidase activity;GO:0004667//prostaglandin-D synthase activity;GO:0005515//protein binding;GO:0016034//maleylacetoacetate isomerase activity;GO:0016209//antioxidant activity;GO:0016491//oxidoreductase activity;GO:0016684//oxidoreduct…	GO:0006518//peptide metabolic process;GO:0006559//L-phenylalanine catabolic process;GO:0006572//tyrosine catabolic process;GO:0006575//cellular modified amino acid metabolic process;GO:0006749//glutathione metabolic process;GO:0006790//sulfur compound metabolic process;GO:0006807//nitrogen compound metabolic process;GO:0006950//response to stress;GO:0006979//response to oxidative stress;GO:000815…		cell 1618
LG07	693401	693600	*	-36.8529	8.05697e-12	3.28736e-09	30.8903	g4995	Genebody	beta-PheRS	PBC30024.1 phenylalanyl-tRNA synthetase beta chain [Apis cerana cerana]	Genetic Information Processing	Translation	ko00970//Aminoacyl-tRNA biosynthesis	K01890	GO:0005575//cellular_component;GO:0005622//intracellular;GO:0005623//cell;GO:0005737//cytoplasm;GO:0005829//cytosol;GO:0009328//phenylalanine-tRNA ligase complex;GO:0016020//membrane;GO:0016021//integral component of membrane;GO:0032991//macromolecular complex;GO:0044424//intracellular part;GO:0044444//cytoplasmic part;GO:0044464//cell part;GO:1902494//catalytic complex	GO:0000166//nucleotide binding;GO:0000287//magnesium ion binding;GO:0002161//aminoacyl-tRNA editing activity;GO:0003674//molecular_function;GO:0003676//nucleic acid binding;GO:0003723//RNA binding;GO:0003824//catalytic activity;GO:0004812//aminoacyl-tRNA ligase activity;GO:0004826//phenylalanine-tRNA ligase activity;GO:0005488//binding;GO:0005524//ATP binding;GO:0008144//drug binding;GO:0015095//…	GO:0002181//cytoplasmic translation;GO:0006082//organic acid metabolic process;GO:0006139//nucleobase-containing compound metabolic process;GO:0006399//tRNA metabolic process;GO:0006412//translation;GO:0006418//tRNA aminoacylation for protein translation;GO:0006432//phenylalanyl-tRNA aminoacylation;GO:0006450//regulation of translational fidelity;GO:0006518//peptide metabolic process;GO:0006520//…		cell 604
LG07	11250601	11250800	*	-29.3035	1.50927e-09	4.09712e-07	-27.3092	g5545	Genebody	GstS1	XP_028521355.1 probable elongation factor 1-gamma 2 [Apis cerana]	Metabolism;Metabolism;Human Diseases;Metabolism;Metabolism;Metabolism	Global and overview maps;Metabolism of other amino acids;Cancers;Xenobiotics biodegradation and metabolism;Xenobiotics biodegradation and metabolism;Lipid metabolism	ko01100//Metabolic pathways;ko00480//Glutathione metabolism;ko05204//Chemical carcinogenesis;ko00980//Metabolism of xenobiotics by cytochrome P450;ko00982//Drug metabolism - cytochrome P450;ko00590//Arachidonic acid metabolism	K04097;K04097;K04097;K04097;K04097;K04097	GO:0001401//mitochondrial sorting and assembly machinery complex;GO:0005575//cellular_component;GO:0005622//intracellular;GO:0005623//cell;GO:0005737//cytoplasm;GO:0044424//intracellular part;GO:0044464//cell part	GO:0003674//molecular_function;GO:0003824//catalytic activity;GO:0004364//glutathione transferase activity;GO:0004601//peroxidase activity;GO:0004602//glutathione peroxidase activity;GO:0004667//prostaglandin-D synthase activity;GO:0005515//protein binding;GO:0016034//maleylacetoacetate isomerase activity;GO:0016209//antioxidant activity;GO:0016491//oxidoreductase activity;GO:0016684//oxidoreduct…	GO:0006518//peptide metabolic process;GO:0006559//L-phenylalanine catabolic process;GO:0006572//tyrosine catabolic process;GO:0006575//cellular modified amino acid metabolic process;GO:0006749//glutathione metabolic process;GO:0006790//sulfur compound metabolic process;GO:0006807//nitrogen compound metabolic process;GO:0006950//response to stress;GO:0006979//response to oxidative stress;GO:000815…		cell 650
LG13	1458601	1458800	*	-34.3669	4.51378e-11	1.63133e-08	27.6278	g8869	Downstream	SARS2	XP_016904197.1 serine--tRNA ligase, mitochondrial isoform X1 [Apis cerana]	Genetic Information Processing	Translation	ko00970//Aminoacyl-tRNA biosynthesis	K01875	GO:0005575//cellular_component;GO:0005622//intracellular;GO:0005623//cell;GO:0005737//cytoplasm;GO:0005739//mitochondrion;GO:0005759//mitochondrial matrix;GO:0009328//phenylalanine-tRNA ligase complex;GO:0009345//glycine-tRNA ligase complex;GO:0031974//membrane-enclosed lumen;GO:0043226//organelle;GO:0043227//membrane-bounded organelle;GO:0043229//intracellular organelle;GO:0043231//intracellular…	GO:0000049//tRNA binding;GO:0000166//nucleotide binding;GO:0003674//molecular_function;GO:0003824//catalytic activity;GO:0004812//aminoacyl-tRNA ligase activity;GO:0004820//glycine-tRNA ligase activity;GO:0004826//phenylalanine-tRNA ligase activity;GO:0004827//proline-tRNA ligase activity;GO:0004828//serine-tRNA ligase activity;GO:0004829//threonine-tRNA ligase activity;GO:0005488//binding;GO:000…	GO:0000959//mitochondrial RNA metabolic process;GO:0006082//organic acid metabolic process;GO:0006139//nucleobase-containing compound metabolic process;GO:0006399//tRNA metabolic process;GO:0006412//translation;GO:0006418//tRNA aminoacylation for protein translation;GO:0006426//glycyl-tRNA aminoacylation;GO:0006432//phenylalanyl-tRNA aminoacylation;GO:0006433//prolyl-tRNA aminoacylation;GO:000643…		cell 1792
