# Supplementary material for: Roles of DNA Methylation in Color Alternation of Eastern Honey Bees (Apis cerana) Induced by the Royal Jelly of Western Honey Bees (Apis mellifera)
Source: Int J Mol Sci. 2024 Mar 16;25(6):3368. doi: 10.3390/ijms25063368 (PMC10969989; doi:10.3390/ijms25063368)
Supplement: Supplementary file 1 [file ijms-25-03368-s001.zip › Table S8.xlsx]

## Sheet: Sheet1
Ontology	Class	Gene Number	Gene ID		The top enriched and classification of Go terms identified between NQs and CQs.
Biological Process	cellular component organization or biogenesis	554	g63;g69;g73;g103;g198;g201;g294;g308;g316;g384;g496;g509;g522;g527;g563;g579;g580;g615;g618;g655;g657;g710;g719;g728;g749;g753;g765;g789;g806;g807;g829;g929;g932;g945;g955;g1008;g1015;g1107;g1192;g1221;g1278;g1292;g1335;g1398;g1462;g1464;g1493;g1495;g1499;g1500;g1524;g1554;g1588;g1600;g1631;g1637;g1713;g1716;g1717;g1742;g1752;g1758;g1761;g1794;g1819;g1845;g1877;g1881;g1889;g1890;g1893;g1911;g1938…
Biological Process	biological regulation	649	g63;g73;g83;g103;g198;g201;g294;g384;g496;g509;g527;g563;g579;g580;g587;g618;g624;g657;g699;g710;g719;g728;g749;g753;g765;g771;g789;g806;g873;g929;g932;g945;g955;g1008;g1015;g1107;g1192;g1193;g1217;g1221;g1278;g1292;g1335;g1362;g1365;g1380;g1398;g1462;g1464;g1480;g1493;g1495;g1499;g1500;g1554;g1588;g1600;g1631;g1637;g1691;g1713;g1716;g1717;g1752;g1758;g1761;g1794;g1819;g1845;g1877;g1878;g1881;g18…
Biological Process	reproductive process	239	g103;g201;g294;g496;g710;g728;g749;g784;g789;g806;g807;g1192;g1221;g1278;g1398;g1462;g1464;g1493;g1554;g1588;g1600;g1631;g1691;g1716;g1742;g1758;g1794;g1878;g1889;g1938;g2295;g2376;g2388;g2534;g2670;g2781;g2882;g2929;g3090;g3094;g3117;g3260;g3312;g3335;g3356;g3384;g3410;g3411;g3422;g3444;g3455;g3478;g3511;g3529;g3537;g3696;g3875;g3886;g3898;g3938;g3945;g3952;g3987;g4067;g4174;g4205;g4226;g4374;g4…
Biological Process	reproduction	255	g103;g201;g294;g496;g657;g710;g728;g749;g784;g789;g806;g807;g932;g1192;g1221;g1278;g1398;g1462;g1464;g1493;g1500;g1554;g1588;g1600;g1631;g1691;g1716;g1742;g1758;g1794;g1878;g1889;g1938;g2295;g2376;g2388;g2534;g2625;g2670;g2781;g2882;g2929;g3090;g3094;g3117;g3260;g3310;g3312;g3335;g3356;g3384;g3410;g3411;g3422;g3444;g3455;g3478;g3511;g3526;g3529;g3537;g3696;g3875;g3886;g3898;g3938;g3945;g3952;g398…
Biological Process	multi-organism process	269	g73;g103;g175;g201;g294;g496;g657;g749;g784;g789;g806;g807;g873;g955;g1008;g1192;g1278;g1398;g1462;g1493;g1554;g1588;g1600;g1631;g1691;g1716;g1742;g1758;g1794;g1878;g1889;g1890;g1935;g1938;g1964;g2295;g2376;g2388;g2534;g2711;g2714;g2781;g2882;g2929;g2980;g3090;g3094;g3117;g3125;g3260;g3281;g3312;g3335;g3343;g3356;g3384;g3410;g3411;g3422;g3427;g3444;g3453;g3455;g3478;g3486;g3511;g3529;g3696;g3725;…
Biological Process	developmental process	462	g63;g103;g201;g294;g384;g496;g527;g563;g618;g624;g655;g657;g710;g719;g728;g749;g765;g784;g789;g806;g807;g929;g932;g1008;g1015;g1107;g1192;g1193;g1217;g1221;g1278;g1335;g1362;g1398;g1462;g1464;g1480;g1493;g1495;g1500;g1554;g1588;g1631;g1637;g1691;g1717;g1742;g1758;g1794;g1845;g1878;g1881;g1889;g1935;g1938;g1948;g1965;g1971;g1991;g2004;g2013;g2025;g2028;g2206;g2295;g2364;g2368;g2376;g2388;g2473;g26…
Biological Process	response to stimulus	514	g63;g73;g83;g103;g198;g201;g294;g384;g496;g502;g527;g563;g580;g587;g624;g655;g657;g710;g728;g749;g765;g771;g789;g806;g807;g929;g932;g955;g981;g1008;g1015;g1107;g1192;g1217;g1221;g1278;g1335;g1362;g1365;g1380;g1398;g1495;g1500;g1554;g1588;g1600;g1631;g1637;g1691;g1713;g1716;g1819;g1845;g1878;g1881;g1890;g1911;g1935;g1948;g1964;g1965;g1991;g2004;g2005;g2013;g2028;g2067;g2120;g2206;g2249;g2270;g2295…
Biological Process	multicellular organismal process	476	g63;g103;g201;g294;g384;g496;g527;g563;g618;g624;g655;g657;g710;g719;g728;g749;g765;g784;g789;g806;g807;g929;g932;g955;g1008;g1015;g1107;g1192;g1193;g1217;g1221;g1278;g1335;g1362;g1398;g1462;g1464;g1480;g1493;g1554;g1588;g1600;g1631;g1637;g1691;g1716;g1717;g1742;g1758;g1794;g1845;g1878;g1889;g1935;g1938;g1948;g1965;g1971;g1991;g2004;g2013;g2025;g2028;g2120;g2206;g2295;g2364;g2368;g2376;g2388;g247…
Biological Process	metabolic process	744	g41;g63;g69;g73;g83;g95;g99;g103;g175;g198;g201;g213;g294;g384;g496;g497;g502;g509;g514;g522;g527;g563;g579;g580;g615;g618;g624;g655;g657;g710;g719;g728;g749;g753;g765;g789;g806;g807;g829;g873;g929;g932;g945;g955;g981;g1008;g1015;g1088;g1107;g1192;g1193;g1217;g1221;g1278;g1292;g1335;g1362;g1365;g1380;g1398;g1462;g1464;g1480;g1499;g1500;g1524;g1554;g1588;g1600;g1637;g1691;g1713;g1716;g1717;g1742;g…
Biological Process	growth	129	g63;g103;g496;g527;g563;g657;g710;g719;g765;g1192;g1221;g1335;g1398;g1499;g1691;g1717;g2013;g2364;g2670;g2707;g2781;g2882;g2929;g3117;g3356;g3384;g3422;g3455;g3627;g3701;g3831;g3853;g3898;g3909;g3938;g3945;g3952;g4374;g4415;g4545;g4601;g4792;g4893;g5251;g5356;g5485;g5651;g5862;g6018;g6032;g6093;g6122;g6170;g6273;g6303;g6327;g6379;g6470;g6759;g6775;g6815;g6842;g6899;g6924;g6979;g7028;g7319;g7635;g…
Biological Process	cellular process	851	g41;g63;g69;g73;g83;g95;g99;g103;g175;g198;g201;g213;g294;g308;g316;g384;g496;g497;g502;g509;g514;g522;g527;g563;g579;g580;g587;g615;g618;g624;g655;g657;g699;g710;g719;g728;g749;g753;g765;g771;g789;g806;g807;g829;g873;g929;g932;g945;g955;g981;g1008;g1015;g1049;g1088;g1107;g1192;g1193;g1217;g1221;g1278;g1292;g1335;g1362;g1365;g1380;g1398;g1462;g1464;g1480;g1493;g1495;g1499;g1500;g1524;g1554;g1588;…
Biological Process	single-organism process	799	g63;g69;g73;g83;g99;g103;g175;g198;g201;g213;g294;g308;g316;g384;g496;g502;g509;g522;g527;g563;g579;g580;g587;g615;g618;g624;g655;g657;g699;g710;g719;g728;g749;g753;g765;g771;g784;g789;g806;g807;g829;g929;g932;g945;g981;g1008;g1015;g1088;g1107;g1192;g1193;g1217;g1221;g1278;g1292;g1335;g1362;g1365;g1380;g1398;g1462;g1464;g1480;g1493;g1495;g1499;g1500;g1554;g1588;g1600;g1631;g1637;g1691;g1713;g1716…
Biological Process	immune system process	131	g73;g201;g294;g496;g749;g1008;g1107;g1217;g1362;g1493;g1588;g1819;g1890;g1935;g1948;g2013;g2028;g2929;g3125;g3216;g3343;g3375;g3384;g3407;g3410;g3455;g3456;g3478;g3909;g4205;g4226;g4340;g4415;g4601;g4973;g4993;g5132;g5203;g5627;g5651;g5763;g5793;g5953;g6032;g6098;g6203;g6285;g6327;g6340;g6345;g6356;g6379;g6385;g6565;g6572;g6759;g6839;g6899;g6924;g6982;g7391;g7528;g7576;g7748;g7877;g8226;g8384;g85…
Biological Process	localization	438	g63;g69;g103;g201;g294;g384;g496;g509;g618;g657;g699;g710;g749;g757;g765;g771;g789;g806;g829;g932;g955;g981;g1008;g1015;g1107;g1192;g1217;g1221;g1335;g1398;g1493;g1495;g1500;g1554;g1588;g1600;g1631;g1691;g1716;g1742;g1752;g1758;g1761;g1794;g1819;g1845;g1877;g1878;g1881;g1903;g1935;g1938;g1965;g1971;g2004;g2013;g2028;g2067;g2111;g2136;g2206;g2249;g2270;g2295;g2364;g2368;g2388;g2623;g2670;g2693;g27…
Biological Process	signaling	313	g63;g73;g103;g198;g384;g496;g509;g527;g563;g580;g587;g624;g710;g749;g765;g771;g789;g929;g1008;g1015;g1107;g1192;g1217;g1221;g1335;g1362;g1380;g1398;g1495;g1588;g1600;g1691;g1716;g1819;g1845;g1881;g1890;g1903;g1935;g1948;g1965;g1991;g2013;g2028;g2067;g2247;g2249;g2270;g2295;g2364;g2368;g2388;g2670;g2674;g2693;g2707;g2724;g2733;g2742;g2865;g2882;g2929;g2967;g2980;g3074;g3090;g3117;g3118;g3135;g3281…
Biological Process	cell aggregation	6	g103;g1554;g1691;g5651;g6899;g5335
Biological Process	biological adhesion	55	g103;g1192;g1554;g1631;g1878;g1965;g2013;g2028;g2206;g2670;g2976;g3310;g3384;g3455;g3482;g3529;g3725;g4204;g4601;g5126;g5485;g5651;g5763;g5984;g6102;g6345;g6511;g6572;g6800;g7635;g8008;g8365;g8381;g8801;g8973;g9198;g9254;g9791;g10006;g10172;g10447;g10450;g5563;g3766;g4739;g5819;g6308;g6673;g6770;g6816;g6835;g7015;g7518;g9203;g10153
Biological Process	locomotion	130	g63;g201;g384;g496;g527;g563;g710;g749;g765;g806;g1217;g1221;g1398;g1493;g1495;g1600;g1631;g1691;g1878;g1965;g2013;g2206;g2295;g2763;g2967;g2976;g3094;g3312;g3384;g3453;g3455;g3478;g3696;g3725;g3800;g3909;g3938;g4067;g4205;g4374;g4517;g4601;g4738;g4805;g4897;g4993;g5089;g5429;g5621;g5622;g5651;g5953;g6025;g6093;g6122;g6289;g6422;g6470;g6511;g6752;g6807;g6815;g6899;g6924;g7283;g7319;g7391;g7635;g7…
Biological Process	detoxification	9	g981;g5467;g5545;g7528;g8568;g3141;g7474;g6754;g8594
Biological Process	behavior	81	g294;g563;g765;g932;g1217;g1398;g1495;g1600;g1631;g1637;g1878;g1971;g1991;g2013;g2120;g2295;g2364;g2376;g2670;g2763;g3094;g3312;g3384;g3696;g3701;g3898;g3909;g3938;g4205;g4301;g4601;g4952;g5118;g5429;g5485;g5621;g5622;g5650;g5651;g6025;g6093;g6122;g6295;g6385;g6775;g6899;g6979;g6982;g7028;g7391;g7576;g7952;g8365;g8381;g8548;g8778;g8868;g8942;g9011;g9229;g9548;g9779;g9820;g9994;g10226;g10264;g1045…
Biological Process	cell killing	2	g6295;g9021
Biological Process	presynaptic process involved in synaptic transmission	13	g103;g765;g1716;g2013;g2882;g3339;g3478;g4641;g7319;g8496;g1255;g7227;g1256
Biological Process	rhythmic process	24	g1398;g2013;g2295;g2376;g4301;g4433;g5118;g5651;g6014;g6284;g6295;g6899;g6903;g9229;g10070;g10128;g10226;g10264;g5563;g760;g1955;g3452;g3477;g6388
Molecular Function	binding	796	g19;g41;g63;g69;g73;g83;g95;g99;g103;g175;g198;g201;g294;g308;g316;g384;g496;g497;g509;g514;g522;g527;g563;g579;g580;g615;g618;g624;g655;g657;g710;g719;g728;g749;g753;g757;g765;g771;g784;g789;g806;g807;g829;g832;g873;g929;g932;g945;g955;g1008;g1015;g1049;g1107;g1192;g1193;g1217;g1221;g1278;g1292;g1335;g1362;g1365;g1380;g1398;g1462;g1464;g1480;g1493;g1495;g1499;g1500;g1524;g1554;g1588;g1600;g1631;…
Molecular Function	catalytic activity	495	g41;g63;g69;g73;g83;g95;g99;g175;g213;g294;g384;g496;g502;g514;g522;g527;g563;g579;g580;g624;g657;g710;g728;g749;g753;g765;g789;g807;g829;g873;g929;g932;g981;g1008;g1088;g1107;g1192;g1217;g1278;g1292;g1362;g1365;g1380;g1398;g1464;g1493;g1499;g1500;g1637;g1713;g1761;g1819;g1881;g1935;g1938;g1964;g1965;g2004;g2005;g2025;g2067;g2120;g2251;g2270;g2368;g2376;g2473;g2623;g2625;g2670;g2674;g2680;g2723;g…
Molecular Function	molecular function regulator	91	g496;g527;g624;g710;g771;g929;g1554;g1881;g1935;g1965;g1991;g2013;g2028;g2067;g2206;g2249;g2295;g2388;g2670;g2733;g2882;g2967;g3090;g3312;g3343;g3407;g3429;g3445;g3455;g3537;g3945;g4523;g4552;g4680;g4805;g4842;g5356;g5375;g5429;g5466;g5862;g6015;g6018;g6170;g6203;g6327;g6379;g6755;g6800;g6815;g6982;g7315;g7391;g7781;g7949;g8229;g8607;g9173;g9805;g10100;g10270;g10638;g10650;g526;g1056;g1310;g3342;…
Molecular Function	structural molecule activity	76	g103;g657;g710;g749;g1495;g1600;g1713;g1716;g1758;g1819;g1877;g1878;g1893;g2004;g2067;g2132;g2388;g3090;g3125;g3220;g3427;g3453;g3540;g3620;g3945;g4950;g5113;g5126;g5203;g5356;g5429;g5650;g5752;g5984;g6565;g6621;g6759;g6800;g7576;g8548;g8607;g8764;g9113;g9221;g9548;g10052;g10450;g197;g588;g1255;g98;g1055;g1170;g1218;g1256;g1492;g1985;g4317;g4478;g4953;g5628;g6042;g6416;g6923;g7612;g7613;g7708;g77…
Molecular Function	translation regulator activity	4	g294;g719;g1107;g10226
Molecular Function	chemoattractant activity	1	g4739
Molecular Function	transcription factor activity, protein binding	43	g198;g955;g1292;g1398;g1691;g1890;g1948;g3407;g3882;g5137;g5340;g5398;g5400;g5575;g5752;g6759;g7290;g7304;g7756;g8226;g8508;g8525;g8822;g8972;g9675;g10070;g526;g3451;g4974;g6028;g6066;g711;g1170;g1336;g1337;g2269;g2579;g4862;g6067;g7475;g7727;g9022;g10390
Molecular Function	electron carrier activity	11	g829;g2976;g3135;g3529;g5608;g6475;g6893;g7181;g6760;g3073;g6668
Molecular Function	protein tag	1	g4953
Molecular Function	antioxidant activity	6	g3345;g5545;g6775;g3141;g760;g8594
Molecular Function	metallochaperone activity	1	g6621
Molecular Function	transporter activity	103	g201;g699;g749;g806;g829;g932;g1015;g1107;g1495;g1691;g1794;g1819;g1881;g1903;g1971;g2270;g2295;g2623;g2711;g2742;g3144;g3419;g3486;g3511;g3853;g3886;g4178;g4995;g5139;g5429;g5467;g5554;g5752;g5996;g6007;g6093;g6369;g6449;g6470;g6621;g6752;g6894;g6924;g7028;g7079;g7576;g8226;g8381;g8390;g8566;g8568;g8607;g8640;g8822;g9021;g9033;g9214;g9221;g9229;g9230;g9318;g9760;g10012;g10261;g588;g980;g3420;g34…
Molecular Function	nucleic acid binding transcription factor activity	53	g496;g580;g1221;g1278;g1890;g1948;g2318;g2679;g3375;g3393;g3447;g3696;g4565;g4971;g5027;g5356;g5747;g6128;g6521;g6766;g6776;g6839;g7283;g7687;g7756;g7877;g8301;g8525;g8657;g8732;g8789;g9283;g9675;g9791;g10070;g3217;g3691;g6838;g654;g1170;g1174;g1291;g2579;g3408;g3423;g3452;g3885;g3891;g4739;g5392;g8429;g9782;g10008
Molecular Function	signal transducer activity	34	g728;g2295;g2388;g3117;g3135;g3376;g3445;g3696;g3701;g3914;g3938;g4552;g4584;g5400;g6289;g6476;g6621;g6766;g6807;g6899;g6979;g7028;g8365;g8508;g8801;g9994;g10070;g7686;g1849;g3311;g3355;g4739;g8363;g9995
Molecular Function	molecular transducer activity	24	g728;g1794;g2295;g3135;g3376;g4584;g5387;g5400;g6289;g6369;g6470;g6476;g6766;g6807;g6979;g7028;g8365;g8381;g8508;g8801;g10070;g3311;g3355;g8363
Cellular Component	organelle part	576	g41;g63;g69;g73;g103;g175;g198;g294;g308;g384;g496;g509;g615;g618;g655;g657;g710;g719;g728;g749;g753;g765;g784;g789;g806;g807;g829;g873;g945;g955;g1008;g1015;g1107;g1217;g1221;g1278;g1292;g1335;g1365;g1380;g1462;g1464;g1480;g1493;g1499;g1524;g1554;g1588;g1600;g1637;g1691;g1713;g1752;g1758;g1761;g1794;g1845;g1877;g1878;g1881;g1890;g1911;g1935;g1938;g1948;g1964;g1971;g2013;g2028;g2050;g2110;g2111;g…
Cellular Component	organelle	702	g41;g63;g69;g73;g103;g175;g198;g201;g294;g308;g384;g496;g502;g509;g563;g579;g580;g615;g618;g655;g657;g710;g719;g728;g749;g753;g765;g784;g789;g806;g807;g829;g873;g932;g945;g955;g1008;g1015;g1107;g1192;g1217;g1221;g1278;g1292;g1335;g1362;g1365;g1380;g1398;g1462;g1464;g1480;g1493;g1499;g1500;g1524;g1554;g1588;g1600;g1637;g1691;g1713;g1716;g1733;g1742;g1752;g1758;g1761;g1794;g1845;g1877;g1878;g1881;g…
Cellular Component	macromolecular complex	474	g69;g99;g103;g198;g201;g294;g384;g496;g502;g655;g657;g710;g719;g728;g749;g765;g784;g789;g807;g829;g873;g932;g945;g955;g1008;g1015;g1107;g1193;g1221;g1278;g1365;g1398;g1462;g1464;g1480;g1495;g1500;g1524;g1554;g1588;g1631;g1691;g1713;g1716;g1717;g1742;g1752;g1758;g1761;g1794;g1845;g1877;g1878;g1881;g1889;g1893;g1911;g1938;g1948;g1964;g2013;g2067;g2111;g2206;g2247;g2249;g2251;g2295;g2368;g2376;g2388…
Cellular Component	cell	810	g41;g63;g69;g73;g83;g99;g103;g175;g198;g201;g294;g308;g384;g496;g502;g509;g527;g563;g579;g580;g615;g618;g655;g657;g699;g710;g719;g728;g749;g753;g765;g771;g784;g789;g806;g807;g829;g873;g929;g932;g945;g955;g1008;g1015;g1107;g1192;g1193;g1217;g1221;g1278;g1292;g1335;g1362;g1365;g1380;g1398;g1462;g1464;g1480;g1493;g1495;g1499;g1500;g1524;g1554;g1588;g1600;g1631;g1637;g1691;g1713;g1716;g1717;g1733;g17…
Cellular Component	cell part	809	g41;g63;g69;g73;g83;g99;g103;g175;g198;g201;g294;g308;g384;g496;g502;g509;g527;g563;g579;g580;g615;g618;g655;g657;g699;g710;g719;g728;g749;g753;g765;g771;g784;g789;g806;g807;g829;g873;g929;g932;g945;g955;g1008;g1015;g1107;g1192;g1193;g1217;g1221;g1278;g1292;g1335;g1362;g1365;g1380;g1398;g1462;g1464;g1480;g1493;g1495;g1499;g1500;g1524;g1554;g1588;g1600;g1631;g1637;g1691;g1713;g1716;g1717;g1733;g17…
Cellular Component	membrane-enclosed lumen	343	g41;g73;g198;g294;g496;g615;g655;g710;g719;g728;g749;g753;g784;g789;g807;g829;g873;g955;g1015;g1107;g1217;g1221;g1292;g1335;g1365;g1462;g1464;g1493;g1588;g1691;g1713;g1752;g1758;g1881;g1890;g1911;g1938;g1948;g1971;g2013;g2028;g2050;g2111;g2206;g2249;g2251;g2295;g2364;g2376;g2521;g2647;g2679;g2693;g2697;g2724;g2742;g2781;g2929;g3125;g3135;g3144;g3183;g3216;g3281;g3335;g3343;g3356;g3375;g3377;g3384…
Cellular Component	symplast	9	g3411;g4738;g8362;g9206;g588;g1219;g3140;g6204;g7915
Cellular Component	cell junction	55	g294;g710;g765;g932;g1192;g1631;g1965;g2004;g2028;g2364;g2882;g3310;g3411;g3478;g3482;g3909;g3938;g4601;g4738;g4805;g5126;g5219;g5387;g5398;g5467;g5485;g5650;g5752;g6014;g6289;g6815;g7629;g7635;g8362;g8390;g8548;g9206;g9805;g10128;g10666;g588;g1219;g6066;g10173;g2269;g3140;g3311;g3901;g4169;g6067;g6204;g7915;g7939;g9022;g10153
Cellular Component	nucleoid	7	g1292;g2028;g8381;g9239;g3141;g1309;g3207
Cellular Component	supramolecular fiber	44	g103;g294;g749;g1192;g1758;g2028;g2132;g2206;g3094;g3260;g3335;g3444;g3620;g4738;g4993;g5089;g5356;g5554;g5621;g5622;g6800;g6842;g7319;g8525;g8778;g9113;g10052;g10112;g9123;g1054;g1987;g4169;g4329;g4481;g4994;g5348;g5620;g6204;g6888;g7015;g9022;g9639;g10031;g10649
Cellular Component	viral occlusion body	3	g4974;g3621;g10302
Cellular Component	other organism	2	g2270;g6303
Cellular Component	other organism part	2	g2270;g6303
Cellular Component	synapse	47	g63;g103;g710;g749;g765;g932;g1600;g1631;g1794;g2004;g2013;g2028;g2295;g2364;g2882;g3339;g3725;g3938;g4301;g4641;g5485;g5650;g5651;g5763;g5862;g6289;g6815;g6842;g6982;g7635;g7918;g8496;g8548;g8778;g9229;g9779;g9994;g10447;g2743;g1555;g3311;g3408;g3894;g4169;g7939;g9022;g9995
Cellular Component	synapse part	34	g63;g103;g710;g765;g932;g1600;g1794;g2004;g2013;g2028;g2295;g2882;g3339;g4301;g4641;g5650;g5651;g5763;g6982;g7635;g7918;g8496;g8548;g9229;g9779;g9994;g10447;g2743;g1555;g3311;g4169;g7939;g9022;g9995
Cellular Component	membrane	432	g63;g69;g83;g103;g175;g201;g294;g384;g496;g527;g615;g657;g699;g728;g749;g765;g771;g806;g829;g932;g1008;g1015;g1088;g1107;g1192;g1221;g1335;g1365;g1380;g1493;g1495;g1499;g1554;g1588;g1600;g1637;g1691;g1716;g1752;g1794;g1845;g1877;g1878;g1881;g1903;g1935;g1938;g1964;g1971;g1991;g2004;g2005;g2013;g2028;g2067;g2136;g2249;g2270;g2273;g2295;g2364;g2388;g2623;g2625;g2670;g2674;g2693;g2697;g2707;g2711;g2…
Cellular Component	membrane part	308	g83;g103;g175;g201;g294;g384;g496;g527;g615;g657;g699;g749;g765;g771;g806;g829;g932;g1008;g1015;g1088;g1107;g1192;g1221;g1335;g1365;g1493;g1495;g1499;g1554;g1637;g1691;g1716;g1752;g1794;g1845;g1881;g1903;g1935;g1938;g1964;g1991;g2004;g2005;g2013;g2028;g2067;g2249;g2270;g2273;g2295;g2388;g2623;g2670;g2674;g2697;g2707;g2711;g2835;g2882;g2967;g2976;g3118;g3135;g3183;g3281;g3310;g3335;g3339;g3358;g33…
Cellular Component	extracellular matrix component	1	g2976
Cellular Component	virion part	5	g1878;g2270;g7308;g10564;g10302
Cellular Component	virion	5	g1878;g2270;g7308;g10564;g10302
Cellular Component	extracellular matrix	3	g2882;g2976;g1309
Cellular Component	extracellular region part	22	g1493;g1588;g1637;g1819;g1935;g2388;g2882;g2976;g3312;g6470;g6815;g8037;g10006;g4974;g760;g1309;g1849;g4695;g4739;g7680;g7727;g8941
Cellular Component	extracellular region	51	g19;g510;g749;g1493;g1588;g1637;g1819;g1935;g2388;g2882;g2976;g3312;g4145;g4204;g4340;g4850;g5651;g6170;g6203;g6340;g6356;g6470;g6815;g6899;g8037;g8569;g9960;g10006;g10391;g4864;g4974;g6812;g10195;g760;g1309;g1849;g3457;g3746;g4369;g4695;g4739;g4775;g6754;g7156;g7680;g7727;g7939;g8574;g8941;g9109;g9200
ACQ-VS-NCQ significant and enrichment GO (Cellular Component)
#	GO ID	Description	GeneRatio (870)	BgRatio (7632)	pvalue	p.adjust	geneID
1	GO:0044424	intracellular part	774 (88.97%)	6154 (80.63%)	1.84971e-12	1.87547e-09	g41;g63;g69;g73;g83;g99;g103;g175;g198;g201;g294;g308;g384;g496;g502;g509;g527;g563;g579;g580;g615;g618;g655;g657;g710;g719;g728;g749;g753;g765;g771;g784;g789;g806;g807;g829;g873;g929;g932;g945;g955;g1008;g1015;g1107;g1192;g1193;g1217;g1221;g1278;g1292;g1335;g1362;g1365;g1380;g1398;g1462;g1464;g1480;g1493;g1495;g1499;g1500;g1524;g1554;g1588;g1600;g1631;g1637;g1691;g1713;g1716;g1717;g1742;g1752;g1…
2	GO:0005622	intracellular	778 (89.43%)	6205 (81.3%)	3.12578e-12	1.87547e-09	g41;g63;g69;g73;g83;g99;g103;g175;g198;g201;g294;g308;g384;g496;g502;g509;g527;g563;g579;g580;g615;g618;g655;g657;g710;g719;g728;g749;g753;g765;g771;g784;g789;g806;g807;g829;g873;g929;g932;g945;g955;g1008;g1015;g1107;g1192;g1193;g1217;g1221;g1278;g1292;g1335;g1362;g1365;g1380;g1398;g1462;g1464;g1480;g1493;g1495;g1499;g1500;g1524;g1554;g1588;g1600;g1631;g1637;g1691;g1713;g1716;g1717;g1742;g1752;g1…
3	GO:0044446	intracellular organelle part	570 (65.52%)	4274 (56%)	8.33255e-10	3.33302e-07	g41;g63;g69;g73;g103;g175;g198;g294;g308;g384;g496;g509;g615;g618;g655;g657;g710;g719;g728;g749;g753;g784;g789;g806;g807;g829;g873;g945;g955;g1008;g1015;g1107;g1217;g1221;g1278;g1292;g1335;g1365;g1380;g1462;g1464;g1480;g1493;g1499;g1524;g1554;g1588;g1600;g1637;g1691;g1713;g1752;g1758;g1761;g1794;g1845;g1877;g1878;g1881;g1890;g1911;g1935;g1938;g1948;g1964;g1971;g2013;g2028;g2050;g2110;g2111;g2132;…
4	GO:0043229	intracellular organelle	699 (80.34%)	5505 (72.13%)	2.11893e-09	4.62459e-07	g41;g63;g69;g73;g103;g175;g198;g201;g294;g308;g384;g496;g502;g509;g563;g579;g580;g615;g618;g655;g657;g710;g719;g728;g749;g753;g765;g784;g789;g806;g807;g829;g873;g932;g945;g955;g1008;g1015;g1107;g1192;g1217;g1221;g1278;g1292;g1335;g1362;g1365;g1380;g1398;g1462;g1464;g1480;g1493;g1499;g1500;g1524;g1554;g1588;g1600;g1637;g1691;g1713;g1716;g1742;g1752;g1758;g1761;g1794;g1845;g1877;g1878;g1881;g1889;g…
5	GO:0044422	organelle part	576 (66.21%)	4349 (56.98%)	2.31202e-09	4.62459e-07	g41;g63;g69;g73;g103;g175;g198;g294;g308;g384;g496;g509;g615;g618;g655;g657;g710;g719;g728;g749;g753;g765;g784;g789;g806;g807;g829;g873;g945;g955;g1008;g1015;g1107;g1217;g1221;g1278;g1292;g1335;g1365;g1380;g1462;g1464;g1480;g1493;g1499;g1524;g1554;g1588;g1600;g1637;g1691;g1713;g1752;g1758;g1761;g1794;g1845;g1877;g1878;g1881;g1890;g1911;g1935;g1938;g1948;g1964;g1971;g2013;g2028;g2050;g2110;g2111;g…
6	GO:0043232	intracellular non-membrane-bounded organelle	359 (41.26%)	2466 (32.31%)	2.3123e-09	4.62459e-07	g41;g73;g103;g198;g201;g294;g308;g496;g563;g618;g655;g710;g719;g728;g749;g784;g789;g932;g955;g1008;g1107;g1192;g1221;g1278;g1292;g1362;g1365;g1462;g1464;g1480;g1493;g1713;g1716;g1742;g1752;g1758;g1877;g1889;g1890;g1893;g1911;g1938;g1948;g1971;g2004;g2013;g2028;g2067;g2110;g2132;g2206;g2247;g2249;g2295;g2364;g2368;g2376;g2534;g2647;g2679;g2714;g2733;g2763;g2781;g2882;g2929;g3094;g3125;g3183;g3220;…
7	GO:0005737	cytoplasm	643 (73.91%)	4976 (65.2%)	3.22223e-09	1e-06	g63;g69;g73;g83;g99;g103;g175;g201;g294;g308;g384;g496;g502;g509;g563;g615;g655;g657;g710;g719;g749;g765;g771;g789;g806;g807;g829;g873;g929;g955;g1008;g1015;g1107;g1192;g1193;g1217;g1221;g1292;g1335;g1362;g1365;g1380;g1398;g1464;g1480;g1493;g1495;g1499;g1524;g1554;g1588;g1600;g1631;g1637;g1713;g1716;g1717;g1742;g1752;g1758;g1761;g1794;g1819;g1845;g1877;g1878;g1881;g1889;g1893;g1935;g1938;g1964;g1…
8	GO:0005829	cytosol	307 (35.29%)	2055 (26.93%)	5.02457e-09	1e-06	g103;g201;g294;g496;g509;g655;g657;g719;g749;g765;g789;g873;g955;g1008;g1015;g1107;g1193;g1217;g1335;g1362;g1365;g1380;g1398;g1499;g1588;g1713;g1717;g1742;g1758;g1761;g1845;g1877;g1878;g1881;g1889;g1893;g1938;g1964;g1971;g2013;g2025;g2028;g2067;g2136;g2364;g2388;g2670;g2680;g2697;g2714;g2742;g2763;g2781;g2882;g2929;g2967;g2980;g3074;g3144;g3220;g3260;g3339;g3343;g3344;g3356;g3377;g3384;g3410;g341…
9	GO:0043226	organelle	702 (80.69%)	5557 (72.81%)	6.94255e-09	1e-06	g41;g63;g69;g73;g103;g175;g198;g201;g294;g308;g384;g496;g502;g509;g563;g579;g580;g615;g618;g655;g657;g710;g719;g728;g749;g753;g765;g784;g789;g806;g807;g829;g873;g932;g945;g955;g1008;g1015;g1107;g1192;g1217;g1221;g1278;g1292;g1335;g1362;g1365;g1380;g1398;g1462;g1464;g1480;g1493;g1499;g1500;g1524;g1554;g1588;g1600;g1637;g1691;g1713;g1716;g1733;g1742;g1752;g1758;g1761;g1794;g1845;g1877;g1878;g1881;g…
10	GO:0043228	non-membrane-bounded organelle	359 (41.26%)	2488 (32.6%)	7.4797e-09	1e-06	g41;g73;g103;g198;g201;g294;g308;g496;g563;g618;g655;g710;g719;g728;g749;g784;g789;g932;g955;g1008;g1107;g1192;g1221;g1278;g1292;g1362;g1365;g1462;g1464;g1480;g1493;g1713;g1716;g1742;g1752;g1758;g1877;g1889;g1890;g1893;g1911;g1938;g1948;g1971;g2004;g2013;g2028;g2067;g2110;g2132;g2206;g2247;g2249;g2295;g2364;g2368;g2376;g2534;g2647;g2679;g2714;g2733;g2763;g2781;g2882;g2929;g3094;g3125;g3183;g3220;…
11	GO:0043231	intracellular membrane-bounded organelle	640 (73.56%)	5005 (65.58%)	5.07464e-08	6e-06	g41;g63;g69;g73;g103;g175;g198;g201;g294;g308;g384;g496;g502;g509;g563;g579;g580;g615;g618;g655;g657;g710;g719;g728;g749;g753;g765;g784;g789;g806;g807;g829;g873;g945;g955;g1008;g1015;g1107;g1192;g1217;g1221;g1278;g1292;g1335;g1365;g1380;g1398;g1462;g1464;g1493;g1499;g1500;g1524;g1554;g1588;g1600;g1637;g1691;g1713;g1742;g1752;g1758;g1761;g1794;g1845;g1878;g1881;g1889;g1890;g1893;g1911;g1935;g1938;…
12	GO:0043227	membrane-bounded organelle	643 (73.91%)	5045 (66.1%)	8.76209e-08	9e-06	g41;g63;g69;g73;g103;g175;g198;g201;g294;g308;g384;g496;g502;g509;g563;g579;g580;g615;g618;g655;g657;g710;g719;g728;g749;g753;g765;g784;g789;g806;g807;g829;g873;g945;g955;g1008;g1015;g1107;g1192;g1217;g1221;g1278;g1292;g1335;g1365;g1380;g1398;g1462;g1464;g1493;g1499;g1500;g1524;g1554;g1588;g1600;g1637;g1691;g1713;g1742;g1752;g1758;g1761;g1794;g1845;g1878;g1881;g1889;g1890;g1893;g1911;g1935;g1938;…
13	GO:0031410	cytoplasmic vesicle	139 (15.98%)	812 (10.64%)	1.72967e-07	1.6e-05	g63;g69;g103;g384;g509;g615;g749;g765;g806;g1008;g1217;g1335;g1380;g1554;g1600;g1794;g1845;g1878;g1935;g1938;g2120;g2249;g2295;g2364;g2388;g2693;g2707;g2742;g2763;g2882;g2929;g2967;g3335;g3339;g3344;g3429;g3444;g3445;g3455;g3478;g3725;g4205;g4226;g4340;g4576;g4584;g4641;g4680;g4738;g4777;g4952;g5089;g5356;g5375;g5429;g5621;g5622;g5984;g6093;g6203;g6303;g6340;g6356;g6358;g6385;g6470;g6565;g6681;g6…
14	GO:0044444	cytoplasmic part	543 (62.41%)	4165 (54.57%)	4.17022e-07	3.6e-05	g63;g69;g73;g99;g103;g175;g201;g294;g308;g384;g496;g509;g563;g615;g655;g657;g719;g749;g765;g789;g806;g807;g829;g873;g955;g1008;g1015;g1107;g1192;g1193;g1217;g1221;g1292;g1335;g1362;g1365;g1380;g1398;g1464;g1493;g1499;g1554;g1588;g1600;g1631;g1637;g1713;g1716;g1717;g1742;g1758;g1761;g1794;g1845;g1877;g1878;g1881;g1889;g1893;g1935;g1938;g1964;g1965;g1971;g2013;g2025;g2028;g2067;g2110;g2120;g2136;g2…
15	GO:0031982	vesicle	143 (16.44%)	855 (11.2%)	4.73184e-07	3.8e-05	g63;g69;g103;g384;g509;g615;g749;g765;g806;g1008;g1217;g1335;g1380;g1554;g1588;g1600;g1794;g1845;g1878;g1935;g1938;g2120;g2249;g2295;g2364;g2388;g2693;g2707;g2742;g2763;g2882;g2929;g2967;g3335;g3339;g3344;g3345;g3429;g3444;g3445;g3455;g3478;g3725;g4205;g4226;g4340;g4576;g4584;g4641;g4680;g4738;g4777;g4952;g5089;g5356;g5375;g5429;g5621;g5622;g5984;g6093;g6203;g6303;g6340;g6356;g6358;g6385;g6470;g6…
16	GO:0044427	chromosomal part	131 (15.06%)	773 (10.13%)	7.49348e-07	5.6e-05	g103;g198;g294;g618;g719;g728;g749;g784;g789;g955;g1221;g1278;g1462;g1713;g1752;g1911;g2206;g2376;g2534;g2679;g2781;g2929;g3125;g3183;g3335;g3343;g3375;g3396;g3407;g3411;g3427;g3537;g3853;g3875;g3882;g4067;g4174;g4417;g4531;g4557;g4565;g4665;g4738;g4842;g5027;g5132;g5275;g5400;g5575;g5621;g5622;g5650;g5953;g6029;g6074;g6170;g6284;g6285;g6327;g6379;g6572;g6670;g6759;g6766;g6776;g6780;g6839;g6840;g…
17	GO:0032991	macromolecular complex	474 (54.48%)	3573 (46.82%)	9.05234e-07	6.4e-05	g69;g99;g103;g198;g201;g294;g384;g496;g502;g655;g657;g710;g719;g728;g749;g765;g784;g789;g807;g829;g873;g932;g945;g955;g1008;g1015;g1107;g1193;g1221;g1278;g1365;g1398;g1462;g1464;g1480;g1495;g1500;g1524;g1554;g1588;g1631;g1691;g1713;g1716;g1717;g1742;g1752;g1758;g1761;g1794;g1845;g1877;g1878;g1881;g1889;g1893;g1911;g1938;g1948;g1964;g2013;g2067;g2111;g2206;g2247;g2249;g2251;g2295;g2368;g2376;g2388…
18	GO:0012505	endomembrane system	255 (29.31%)	1739 (22.79%)	1.2106e-06	8.1e-05	g63;g69;g103;g175;g201;g384;g496;g509;g749;g765;g771;g806;g807;g1008;g1015;g1107;g1217;g1221;g1335;g1380;g1499;g1554;g1600;g1637;g1716;g1794;g1845;g1878;g1881;g1935;g1938;g1964;g2136;g2249;g2270;g2295;g2388;g2670;g2674;g2693;g2697;g2724;g2763;g2882;g2929;g2967;g2976;g3118;g3144;g3281;g3312;g3318;g3335;g3344;g3362;g3377;g3384;g3427;g3429;g3445;g3453;g3455;g3478;g3725;g3853;g4178;g4205;g4226;g4340;…
19	GO:0044428	nuclear part	330 (37.93%)	2357 (30.88%)	1.50605e-06	9.5e-05	g41;g73;g198;g294;g496;g615;g655;g710;g719;g728;g749;g753;g784;g789;g873;g945;g955;g1008;g1015;g1107;g1217;g1221;g1335;g1365;g1462;g1464;g1493;g1524;g1588;g1691;g1713;g1752;g1758;g1761;g1881;g1890;g1911;g1938;g1948;g1964;g1971;g2013;g2050;g2111;g2206;g2249;g2251;g2295;g2364;g2376;g2473;g2521;g2647;g2661;g2670;g2679;g2693;g2697;g2724;g2742;g2781;g2929;g3125;g3144;g3183;g3216;g3281;g3318;g3335;g334…
20	GO:0005694	chromosome	146 (16.78%)	899 (11.78%)	2.08773e-06	0.000125	g73;g103;g198;g201;g294;g618;g719;g728;g749;g784;g789;g955;g1221;g1278;g1462;g1713;g1752;g1890;g1911;g1948;g2206;g2249;g2376;g2534;g2679;g2781;g2929;g3125;g3183;g3335;g3343;g3375;g3396;g3407;g3411;g3427;g3537;g3853;g3875;g3882;g4067;g4174;g4417;g4517;g4531;g4557;g4565;g4665;g4738;g4842;g5027;g5132;g5275;g5400;g5575;g5621;g5622;g5650;g5953;g6029;g6074;g6170;g6284;g6285;g6327;g6379;g6572;g6670;g675…
21	GO:0031981	nuclear lumen	297 (34.14%)	2093 (27.42%)	2.21565e-06	0.000127	g41;g73;g198;g294;g496;g615;g655;g710;g719;g728;g753;g784;g789;g873;g955;g1015;g1107;g1217;g1221;g1335;g1365;g1462;g1464;g1493;g1588;g1691;g1713;g1752;g1758;g1890;g1911;g1938;g1948;g1971;g2013;g2050;g2111;g2206;g2249;g2251;g2295;g2364;g2376;g2521;g2647;g2679;g2693;g2697;g2724;g2742;g2781;g2929;g3125;g3144;g3183;g3216;g3281;g3335;g3343;g3356;g3375;g3377;g3384;g3396;g3407;g3411;g3421;g3422;g3453;g3…
22	GO:0000785	chromatin	82 (9.43%)	439 (5.75%)	2.66052e-06	0.000145	g198;g294;g784;g955;g1221;g1278;g1462;g1752;g1911;g2206;g2376;g2679;g2781;g3183;g3343;g3375;g3396;g3407;g3411;g3853;g3882;g4067;g4174;g4417;g4531;g4557;g4565;g4842;g5275;g5400;g5953;g6029;g6284;g6285;g6759;g6766;g6780;g6839;g6840;g6919;g7283;g7687;g7877;g8065;g8362;g8503;g8657;g8727;g8732;g8873;g9218;g9254;g9283;g9793;g9853;g10070;g10447;g10599;g1255;g3202;g5471;g6066;g6838;g654;g1169;g1256;g1985…
23	GO:0016604	nuclear body	71 (8.16%)	365 (4.78%)	2.92853e-06	0.000153	g719;g753;g873;g1015;g1752;g2697;g2724;g2781;g3343;g3384;g3407;g3455;g3482;g3537;g4067;g4433;g4523;g5113;g5137;g5275;g5651;g5953;g6170;g6327;g6437;g6670;g6840;g6899;g7290;g7304;g7748;g7810;g7877;g7951;g8007;g8362;g8657;g8727;g8732;g8972;g9218;g10112;g10255;g10391;g10447;g10536;g10599;g1255;g3451;g6066;g10051;g654;g1170;g1256;g1337;g1955;g2319;g2937;g3140;g4793;g6035;g6067;g6204;g7159;g7160;g8380;…
24	GO:0005849	mRNA cleavage factor complex	12 (1.38%)	25 (0.33%)	5.6501e-06	0.000283	g873;g1752;g2111;g2521;g2781;g3482;g6289;g8732;g10112;g7159;g7160;g7940
25	GO:0005623	cell	810 (93.1%)	6785 (88.9%)	6.50624e-06	0.000312	g41;g63;g69;g73;g83;g99;g103;g175;g198;g201;g294;g308;g384;g496;g502;g509;g527;g563;g579;g580;g615;g618;g655;g657;g699;g710;g719;g728;g749;g753;g765;g771;g784;g789;g806;g807;g829;g873;g929;g932;g945;g955;g1008;g1015;g1107;g1192;g1193;g1217;g1221;g1278;g1292;g1335;g1362;g1365;g1380;g1398;g1462;g1464;g1480;g1493;g1495;g1499;g1500;g1524;g1554;g1588;g1600;g1631;g1637;g1691;g1713;g1716;g1717;g1733;g17…
26	GO:0044464	cell part	809 (92.99%)	6778 (88.81%)	7.95869e-06	0.000367	g41;g63;g69;g73;g83;g99;g103;g175;g198;g201;g294;g308;g384;g496;g502;g509;g527;g563;g579;g580;g615;g618;g655;g657;g699;g710;g719;g728;g749;g753;g765;g771;g784;g789;g806;g807;g829;g873;g929;g932;g945;g955;g1008;g1015;g1107;g1192;g1193;g1217;g1221;g1278;g1292;g1335;g1362;g1365;g1380;g1398;g1462;g1464;g1480;g1493;g1495;g1499;g1500;g1524;g1554;g1588;g1600;g1631;g1637;g1691;g1713;g1716;g1717;g1733;g17…
27	GO:0005768	endosome	73 (8.39%)	391 (5.12%)	1e-05	0.000438	g63;g69;g103;g384;g509;g1008;g1217;g1380;g1845;g1878;g2249;g2693;g2763;g3335;g3344;g3445;g3455;g3478;g4205;g4576;g4680;g4777;g4952;g5089;g5356;g5375;g6093;g6358;g6385;g6470;g6944;g6982;g7079;g7290;g7319;g7572;g7629;g8008;g8229;g8496;g8525;g8568;g8778;g8973;g9021;g9167;g9173;g9820;g10246;g10270;g10536;g10638;g10650;g1255;g2743;g4974;g10173;g760;g1256;g1718;g1987;g3621;g4368;g4739;g5399;g5616;g6415…
28	GO:0098791	Golgi subcompartment	66 (7.59%)	346 (4.53%)	1.3e-05	0.000557	g63;g103;g175;g509;g806;g1554;g1600;g1637;g1878;g2136;g2270;g2388;g2763;g2967;g3312;g3362;g3384;g3725;g4205;g4366;g4680;g4777;g4952;g5429;g5866;g5971;g5984;g6385;g6565;g6681;g7391;g7513;g7629;g7809;g7949;g7951;g7952;g8196;g8568;g8735;g9021;g9167;g9198;g9318;g10030;g10261;g10601;g10650;g1255;g591;g1256;g1888;g3408;g5168;g5609;g6415;g6673;g6806;g7612;g7939;g8195;g8495;g8570;g8738;g9354;g10302
29	GO:0044433	cytoplasmic vesicle part	88 (10.11%)	501 (6.56%)	1.5e-05	0.000616	g63;g69;g103;g384;g749;g806;g1008;g1335;g1380;g1554;g1794;g1845;g1878;g1935;g1938;g2295;g2388;g2693;g2707;g2763;g3339;g3344;g3444;g3445;g3455;g4205;g4340;g4584;g4952;g5089;g5356;g5429;g5621;g5622;g5984;g6093;g6203;g6303;g6340;g6356;g6358;g6470;g6565;g6681;g6899;g6944;g7290;g7572;g7576;g7629;g7781;g8226;g8496;g8525;g8568;g8569;g8778;g8973;g9021;g9198;g9820;g9960;g10246;g10261;g10270;g10447;g10536;…
30	GO:0070013	intracellular organelle lumen	343 (39.43%)	2525 (33.08%)	1.8e-05	0.000705	g41;g73;g198;g294;g496;g615;g655;g710;g719;g728;g749;g753;g784;g789;g807;g829;g873;g955;g1015;g1107;g1217;g1221;g1292;g1335;g1365;g1462;g1464;g1493;g1588;g1691;g1713;g1752;g1758;g1881;g1890;g1911;g1938;g1948;g1971;g2013;g2028;g2050;g2111;g2206;g2249;g2251;g2295;g2364;g2376;g2521;g2647;g2679;g2693;g2697;g2724;g2742;g2781;g2929;g3125;g3135;g3144;g3183;g3216;g3281;g3335;g3343;g3356;g3375;g3377;g3384…
31	GO:0043233	organelle lumen	343 (39.43%)	2526 (33.1%)	1.8e-05	0.000709	g41;g73;g198;g294;g496;g615;g655;g710;g719;g728;g749;g753;g784;g789;g807;g829;g873;g955;g1015;g1107;g1217;g1221;g1292;g1335;g1365;g1462;g1464;g1493;g1588;g1691;g1713;g1752;g1758;g1881;g1890;g1911;g1938;g1948;g1971;g2013;g2028;g2050;g2111;g2206;g2249;g2251;g2295;g2364;g2376;g2521;g2647;g2679;g2693;g2697;g2724;g2742;g2781;g2929;g3125;g3135;g3144;g3183;g3216;g3281;g3335;g3343;g3356;g3375;g3377;g3384…
32	GO:0031974	membrane-enclosed lumen	343 (39.43%)	2527 (33.11%)	1.9e-05	0.000714	g41;g73;g198;g294;g496;g615;g655;g710;g719;g728;g749;g753;g784;g789;g807;g829;g873;g955;g1015;g1107;g1217;g1221;g1292;g1335;g1365;g1462;g1464;g1493;g1588;g1691;g1713;g1752;g1758;g1881;g1890;g1911;g1938;g1948;g1971;g2013;g2028;g2050;g2111;g2206;g2249;g2251;g2295;g2364;g2376;g2521;g2647;g2679;g2693;g2697;g2724;g2742;g2781;g2929;g3125;g3135;g3144;g3183;g3216;g3281;g3335;g3343;g3356;g3375;g3377;g3384…
33	GO:0005847	mRNA cleavage and polyadenylation specificity factor complex	10 (1.15%)	20 (0.26%)	2.2e-05	0.000798	g873;g1752;g2111;g2781;g3482;g8732;g10112;g7159;g7160;g7940
34	GO:0000790	nuclear chromatin	60 (6.9%)	311 (4.07%)	2.3e-05	0.000798	g198;g955;g1221;g1462;g1752;g1911;g2376;g2781;g3343;g3396;g3407;g3853;g3882;g4174;g4417;g4557;g4565;g5275;g5400;g5953;g6029;g6284;g6285;g6759;g6766;g6780;g6840;g6919;g7283;g7877;g8362;g8503;g8657;g8727;g8732;g8873;g9218;g9254;g9283;g9793;g9853;g10070;g1255;g3202;g5471;g6066;g654;g1256;g3207;g3885;g4739;g5674;g6067;g7475;g8380;g8567;g8574;g10145;g10390;g10537
35	GO:0034399	nuclear periphery	28 (3.22%)	109 (1.43%)	2.3e-05	0.000798	g655;g955;g1015;g3343;g3453;g3853;g4952;g5139;g5621;g5622;g5752;g6203;g6759;g6839;g9113;g588;g1255;g6838;g1256;g3766;g4807;g5620;g5674;g6035;g7475;g8594;g9022;g10537
36	GO:0044454	nuclear chromosome part	79 (9.08%)	451 (5.91%)	4.6e-05	0.001534	g198;g789;g955;g1221;g1462;g1713;g1752;g1911;g2376;g2781;g2929;g3125;g3335;g3343;g3396;g3407;g3411;g3853;g3882;g4174;g4417;g4557;g4565;g4665;g5027;g5275;g5400;g5575;g5650;g5953;g6029;g6284;g6285;g6572;g6759;g6766;g6780;g6840;g6919;g7283;g7290;g7866;g7877;g8065;g8362;g8503;g8657;g8727;g8732;g8873;g9218;g9254;g9283;g9793;g9853;g10070;g1255;g3202;g4974;g5471;g6066;g10051;g654;g1256;g3207;g3408;g3885…
37	GO:0035770	ribonucleoprotein granule	37 (4.25%)	172 (2.25%)	8.7e-05	0.00275	g294;g655;g719;g1464;g1742;g1889;g1893;g3410;g3411;g3482;g3853;g3898;g3945;g5027;g5113;g5137;g6007;g6771;g6842;g7877;g8226;g8764;g8873;g9612;g10226;g10255;g10264;g10553;g1288;g3342;g5195;g594;g1170;g1287;g5196;g6917;g8993
38	GO:0005634	nucleus	443 (50.92%)	3426 (44.89%)	8.7e-05	0.00275	g41;g73;g198;g201;g294;g308;g496;g502;g563;g579;g580;g615;g618;g655;g710;g719;g728;g749;g753;g784;g789;g873;g945;g955;g1008;g1015;g1107;g1192;g1217;g1221;g1278;g1335;g1365;g1398;g1462;g1464;g1493;g1499;g1500;g1524;g1588;g1637;g1691;g1713;g1752;g1758;g1761;g1881;g1890;g1893;g1911;g1938;g1948;g1964;g1971;g2013;g2028;g2050;g2111;g2206;g2249;g2251;g2295;g2364;g2376;g2473;g2521;g2534;g2647;g2661;g2670…
39	GO:0098852	lytic vacuole membrane	32 (3.68%)	142 (1.86%)	0.000103	0.003107	g63;g615;g749;g1008;g2714;g3627;g4205;g4584;g4952;g5089;g6093;g6894;g6944;g7572;g7576;g7629;g8496;g8525;g8568;g8778;g9021;g10246;g10270;g10447;g4974;g1169;g1718;g3621;g4368;g6770;g8495;g8570
40	GO:0030136	clathrin-coated vesicle	17 (1.95%)	56 (0.73%)	0.000104	0.003107	g103;g509;g1600;g1794;g3429;g3478;g5089;g6470;g8229;g8525;g8778;g9021;g9820;g1255;g1256;g6770;g7939
41	GO:0036464	cytoplasmic ribonucleoprotein granule	35 (4.02%)	163 (2.14%)	0.000139	0.004071	g294;g655;g719;g1464;g1742;g1889;g1893;g3410;g3411;g3853;g3898;g3945;g5027;g5113;g5137;g6007;g6771;g6842;g8226;g8764;g8873;g9612;g10226;g10255;g10264;g10553;g1288;g3342;g5195;g594;g1170;g1287;g5196;g6917;g8993
42	GO:0000139	Golgi membrane	56 (6.44%)	304 (3.98%)	0.000158	0.004435	g103;g175;g806;g1554;g1600;g1878;g2136;g2270;g2388;g2763;g2967;g3362;g3384;g3725;g4366;g4777;g4952;g5866;g5971;g5984;g6303;g6385;g6565;g6681;g7391;g7513;g7629;g7809;g7949;g7951;g7952;g8196;g8568;g8735;g9021;g9167;g9198;g9318;g10030;g10261;g10601;g10650;g591;g1888;g3408;g5168;g5609;g6673;g6806;g7612;g7939;g8195;g8495;g8570;g9354;g10302
43	GO:0055037	recycling endosome	20 (2.3%)	74 (0.97%)	0.000159	0.004435	g509;g1878;g2249;g2693;g2763;g3445;g3478;g4205;g4952;g5089;g5375;g7079;g9021;g9173;g9820;g4974;g760;g5399;g6770;g10153
44	GO:0005654	nucleoplasm	237 (27.24%)	1705 (22.34%)	0.000174	0.004753	g198;g496;g615;g710;g719;g728;g753;g784;g789;g873;g955;g1015;g1107;g1217;g1335;g1462;g1493;g1588;g1691;g1713;g1752;g1758;g1890;g1911;g1938;g1948;g2050;g2111;g2249;g2251;g2376;g2521;g2679;g2693;g2697;g2724;g2742;g2781;g2929;g3144;g3183;g3216;g3281;g3343;g3356;g3375;g3377;g3384;g3407;g3411;g3421;g3422;g3455;g3456;g3482;g3537;g3831;g3847;g3875;g3882;g3987;g4067;g4174;g4417;g4427;g4433;g4523;g4545;g4…
45	GO:0031988	membrane-bounded vesicle	92 (10.57%)	565 (7.4%)	0.000183	0.004878	g103;g384;g509;g749;g765;g806;g1008;g1335;g1554;g1588;g1600;g1794;g1878;g1935;g1938;g2295;g2388;g2693;g2707;g2763;g2882;g2929;g3339;g3345;g3429;g3444;g3445;g3478;g4205;g4226;g4340;g4584;g4641;g4738;g5089;g5429;g5621;g5622;g5984;g6203;g6303;g6340;g6356;g6470;g6565;g6681;g6815;g6899;g7391;g7528;g7576;g7629;g7781;g8226;g8229;g8496;g8525;g8569;g8778;g9021;g9198;g9820;g9960;g10246;g10261;g10447;g10536…
46	GO:0016023	cytoplasmic, membrane-bounded vesicle	88 (10.11%)	537 (7.04%)	0.000203	0.005303	g103;g384;g509;g749;g765;g806;g1008;g1335;g1554;g1600;g1794;g1878;g1935;g1938;g2295;g2388;g2693;g2707;g2763;g2882;g2929;g3339;g3429;g3444;g3445;g3478;g4205;g4226;g4340;g4584;g4641;g4738;g5089;g5429;g5621;g5622;g5984;g6203;g6303;g6340;g6356;g6470;g6565;g6681;g6899;g7391;g7528;g7576;g7629;g7781;g8226;g8229;g8496;g8525;g8569;g8778;g9021;g9198;g9820;g9960;g10246;g10261;g10447;g10536;g1255;g2743;g1017…
47	GO:0098588	bounding membrane of organelle	172 (19.77%)	1186 (15.54%)	0.00022	0.005607	g63;g103;g175;g384;g615;g749;g806;g1008;g1107;g1221;g1335;g1380;g1499;g1554;g1600;g1794;g1845;g1878;g1935;g1938;g2028;g2136;g2270;g2295;g2388;g2674;g2693;g2697;g2714;g2763;g2967;g2976;g3281;g3344;g3362;g3384;g3445;g3455;g3627;g3725;g4178;g4205;g4366;g4545;g4576;g4584;g4777;g4952;g5025;g5089;g5203;g5340;g5356;g5375;g5429;g5545;g5554;g5621;g5622;g5627;g5650;g5747;g5866;g5971;g5984;g6007;g6032;g6093…
48	GO:0005643	nuclear pore	18 (2.07%)	65 (0.85%)	0.00024	0.005908	g1008;g1015;g3144;g3427;g3453;g3853;g5554;g5752;g6572;g6839;g6990;g7781;g10012;g588;g6838;g1985;g4807;g4862
49	GO:0005774	vacuolar membrane	40 (4.6%)	200 (2.62%)	0.000241	0.005908	g63;g615;g749;g1008;g2714;g3627;g4178;g4205;g4584;g4952;g5089;g5203;g5554;g5627;g6093;g6894;g6944;g7572;g7576;g7629;g7951;g8381;g8496;g8525;g8568;g8778;g9021;g9760;g10246;g10270;g10447;g4974;g10173;g1169;g1718;g3621;g4368;g6770;g8495;g8570
50	GO:0031984	organelle subcompartment	104 (11.95%)	663 (8.69%)	0.000297	0.007139	g63;g103;g175;g509;g657;g806;g1107;g1221;g1499;g1554;g1600;g1637;g1878;g2136;g2270;g2295;g2388;g2674;g2697;g2763;g2967;g3281;g3312;g3362;g3384;g3725;g4205;g4366;g4545;g4680;g4777;g4952;g5025;g5336;g5340;g5356;g5429;g5627;g5747;g5866;g5971;g5984;g6385;g6565;g6681;g6752;g6903;g7028;g7391;g7513;g7629;g7809;g7850;g7949;g7951;g7952;g8196;g8568;g8607;g8735;g9021;g9167;g9198;g9318;g10030;g10261;g10601;g…
51	GO:0000228	nuclear chromosome	81 (9.31%)	492 (6.45%)	0.000315	0.007418	g73;g198;g789;g955;g1221;g1462;g1713;g1752;g1911;g2376;g2781;g2929;g3125;g3335;g3343;g3396;g3407;g3411;g3853;g3882;g4174;g4417;g4557;g4565;g4665;g5027;g5275;g5400;g5575;g5650;g5953;g6029;g6284;g6285;g6572;g6759;g6766;g6780;g6840;g6919;g7283;g7290;g7866;g7877;g8065;g8362;g8503;g8657;g8727;g8732;g8873;g9218;g9254;g9283;g9793;g9853;g10070;g1255;g3202;g4974;g5471;g6066;g10051;g654;g1256;g3207;g3408;g…
52	GO:0033263	CORVET complex	5 (0.57%)	7 (0.09%)	0.000328	0.007573	g69;g5089;g8525;g8778;g6770
53	GO:0005769	early endosome	32 (3.68%)	152 (1.99%)	0.000386	0.008736	g69;g509;g1380;g3335;g3344;g3445;g3455;g4205;g4952;g5089;g6982;g7079;g7290;g7629;g8008;g8229;g8496;g8525;g8778;g8973;g9173;g9820;g10270;g10650;g1255;g1256;g1987;g4368;g4739;g6770;g7015;g7939
54	GO:0044431	Golgi apparatus part	67 (7.7%)	398 (5.21%)	0.000562	0.012489	g63;g103;g175;g509;g806;g1554;g1600;g1637;g1878;g2136;g2270;g2388;g2763;g2967;g3312;g3362;g3384;g3725;g4205;g4366;g4680;g4777;g4952;g5429;g5866;g5971;g5984;g6303;g6385;g6565;g6681;g7391;g7513;g7629;g7809;g7949;g7951;g7952;g8196;g8568;g8735;g9021;g9167;g9198;g9318;g10030;g10261;g10601;g10650;g1255;g591;g1256;g1888;g3408;g5168;g5609;g6415;g6673;g6806;g7612;g7939;g8195;g8495;g8570;g8738;g9354;g10302
55	GO:0010008	endosome membrane	39 (4.48%)	203 (2.66%)	0.000665	0.014513	g63;g384;g1008;g1380;g1845;g1878;g2693;g2763;g3344;g3445;g3455;g4205;g4952;g5089;g5356;g5375;g6093;g6358;g6944;g7290;g7572;g7629;g8496;g8525;g8568;g8778;g8973;g9820;g10246;g10270;g10650;g10173;g760;g1718;g3621;g5616;g6770;g7015;g8495
56	GO:0030135	coated vesicle	27 (3.1%)	125 (1.64%)	0.000709	0.015203	g103;g509;g1554;g1600;g1794;g1938;g2388;g3429;g3478;g5089;g5984;g6470;g6565;g6681;g7781;g8229;g8525;g8778;g9021;g9198;g9820;g10261;g1255;g1256;g5609;g6770;g7939
57	GO:0002081	outer acrosomal membrane	4 (0.46%)	5 (0.07%)	0.000763	0.016062	g5429;g5621;g5622;g5620
58	GO:0071957	old mitotic spindle pole body	5 (0.57%)	8 (0.1%)	0.000793	0.016404	g1758;g5621;g5622;g5620;g7984
59	GO:0043234	protein complex	381 (43.79%)	2962 (38.81%)	0.000815	0.016583	g69;g99;g103;g198;g201;g294;g384;g496;g502;g655;g657;g710;g719;g728;g749;g765;g784;g789;g807;g829;g873;g932;g1008;g1193;g1221;g1365;g1398;g1462;g1464;g1480;g1495;g1500;g1554;g1588;g1631;g1691;g1713;g1716;g1717;g1752;g1758;g1794;g1845;g1878;g1881;g1893;g1911;g1938;g1948;g1964;g2067;g2111;g2247;g2249;g2251;g2295;g2368;g2376;g2388;g2473;g2521;g2534;g2623;g2661;g2697;g2714;g2763;g2781;g2882;g2929;g29…
60	GO:0001669	acrosomal vesicle	9 (1.03%)	24 (0.31%)	0.000831	0.016628	g4226;g5429;g5621;g5622;g760;g1194;g4169;g5620;g10302
61	GO:0005635	nuclear envelope	46 (5.29%)	254 (3.33%)	0.000877	0.017246	g749;g1008;g1015;g1221;g1881;g1964;g2295;g2670;g3144;g3318;g3427;g3453;g3853;g5113;g5139;g5554;g5621;g5622;g5752;g6170;g6572;g6839;g6990;g7687;g7781;g8503;g8727;g9113;g10012;g10447;g588;g2743;g6838;g654;g1169;g1985;g3140;g4807;g4862;g5620;g6751;g6836;g7727;g7984;g9067;g10464
62	GO:0044440	endosomal part	41 (4.71%)	220 (2.88%)	0.000923	0.017525	g63;g69;g384;g1008;g1380;g1845;g1878;g2693;g2763;g3344;g3445;g3455;g4205;g4952;g5089;g5356;g5375;g6093;g6358;g6470;g6944;g7290;g7572;g7629;g8496;g8525;g8568;g8778;g8973;g9820;g10246;g10270;g10650;g10173;g760;g1718;g3621;g5616;g6770;g7015;g8495
63	GO:0005765	lysosomal membrane	23 (2.64%)	102 (1.34%)	0.000927	0.017525	g63;g615;g749;g2714;g3627;g4205;g4584;g5089;g6093;g6944;g7572;g7576;g8525;g8778;g9021;g10270;g4974;g1169;g1718;g4368;g6770;g8495;g8570
64	GO:0031965	nuclear membrane	31 (3.56%)	153 (2%)	0.000935	0.017525	g1221;g1964;g2295;g2670;g3318;g3427;g3453;g3853;g5113;g5139;g5621;g5622;g5752;g6839;g6990;g7687;g7781;g8727;g9113;g10447;g588;g6838;g1169;g3140;g4807;g5620;g6751;g6836;g7727;g9067;g10464
65	GO:0005905	coated pit	8 (0.92%)	20 (0.26%)	0.000989	0.018262	g103;g765;g771;g1794;g3429;g6470;g9820;g7518
66	GO:0030141	secretory granule	36 (4.14%)	187 (2.45%)	0.001016	0.018394	g103;g749;g1935;g2295;g2929;g4205;g4226;g4340;g5429;g5621;g5622;g6203;g6340;g6356;g6565;g6899;g7576;g8226;g8496;g8569;g9021;g9960;g2743;g10195;g760;g1169;g1194;g1718;g4169;g4739;g5620;g6770;g6888;g7939;g9200;g10302
67	GO:0031901	early endosome membrane	14 (1.61%)	50 (0.66%)	0.001027	0.018394	g1380;g3344;g3445;g4205;g4952;g5089;g7629;g8496;g8973;g9820;g10270;g10650;g6770;g7015
68	GO:0031090	organelle membrane	221 (25.4%)	1624 (21.28%)	0.0011	0.01942	g63;g103;g175;g384;g615;g657;g749;g765;g806;g829;g1008;g1107;g1221;g1335;g1380;g1499;g1554;g1600;g1794;g1845;g1878;g1935;g1938;g1964;g2028;g2136;g2270;g2295;g2388;g2670;g2674;g2693;g2697;g2707;g2714;g2763;g2967;g2976;g3281;g3318;g3339;g3344;g3345;g3362;g3384;g3427;g3444;g3445;g3453;g3455;g3627;g3725;g3853;g4178;g4205;g4366;g4545;g4576;g4584;g4777;g4952;g5025;g5089;g5113;g5139;g5203;g5340;g5356;g5…
69	GO:0044437	vacuolar part	43 (4.94%)	236 (3.09%)	0.001126	0.019583	g63;g615;g749;g1008;g2714;g3627;g4178;g4205;g4584;g4952;g5089;g5203;g5554;g5627;g6093;g6356;g6894;g6944;g7572;g7576;g7629;g7951;g8381;g8496;g8525;g8568;g8569;g8778;g9021;g9760;g10246;g10270;g10447;g4974;g10173;g1169;g1718;g3621;g4368;g4695;g6770;g8495;g8570
70	GO:0012506	vesicle membrane	46 (5.29%)	258 (3.38%)	0.001231	0.021097	g103;g384;g749;g765;g806;g1008;g1335;g1554;g1794;g1935;g1938;g2295;g2388;g2693;g2707;g3339;g3345;g3444;g4205;g4584;g5429;g5621;g5622;g5984;g6303;g6470;g6565;g6681;g7576;g7629;g7781;g8226;g9021;g9198;g10261;g10536;g2743;g10173;g1169;g1718;g4841;g5609;g5620;g6888;g7939;g8195
71	GO:0099568	cytoplasmic region	65 (7.47%)	396 (5.19%)	0.001331	0.022459	g103;g749;g789;g1008;g1015;g1192;g1493;g1794;g1965;g2110;g2249;g2733;g2763;g2882;g3094;g3117;g3335;g3339;g3377;g3478;g3529;g3725;g3952;g4738;g4805;g4989;g5375;g5429;g5485;g5651;g5730;g6511;g7781;g7918;g8081;g8196;g8822;g8942;g9548;g9994;g10226;g10601;g4974;g6354;g7686;g7979;g9123;g1283;g3408;g3477;g3766;g4169;g4329;g4841;g5168;g6308;g6416;g6888;g7939;g9203;g9639;g9995;g10031;g10101;g10153
72	GO:0005815	microtubule organizing center	58 (6.67%)	345 (4.52%)	0.001348	0.022459	g308;g618;g749;g789;g1480;g1758;g2247;g2781;g2929;g3260;g3310;g3335;g3339;g3455;g3620;g4680;g4738;g5219;g5275;g5429;g5621;g5622;g6379;g6523;g6572;g6718;g6759;g6807;g6982;g7304;g7319;g7705;g7781;g7877;g8081;g8226;g10070;g10112;g10450;g1219;g4974;g7979;g9123;g10051;g1169;g2538;g2681;g2782;g3207;g4481;g5620;g6416;g6888;g7984;g8606;g9807;g10031;g10649
73	GO:0005802	trans-Golgi network	25 (2.87%)	118 (1.55%)	0.001472	0.023948	g103;g509;g1637;g1878;g2763;g2967;g3725;g4205;g4680;g4777;g5429;g5866;g6385;g7391;g9021;g9167;g10650;g1255;g591;g1256;g1888;g6415;g6673;g8738;g10302
74	GO:1990251	Mmi1 nuclear focus complex	3 (0.34%)	3 (0.04%)	0.001477	0.023948	g873;g3343;g10537
75	GO:0000323	lytic vacuole	43 (4.94%)	240 (3.14%)	0.001589	0.024875	g63;g103;g201;g615;g749;g765;g1008;g2714;g3384;g3627;g4205;g4584;g4952;g5089;g6093;g6356;g6470;g6752;g6813;g6894;g6944;g7572;g7576;g7629;g8496;g8525;g8568;g8569;g8778;g9021;g10246;g10270;g10447;g4974;g1169;g1718;g2937;g3621;g4368;g4695;g6770;g8495;g8570
76	GO:0009506	plasmodesma	9 (1.03%)	26 (0.34%)	0.00161	0.024875	g3411;g4738;g8362;g9206;g588;g1219;g3140;g6204;g7915
77	GO:0055044	symplast	9 (1.03%)	26 (0.34%)	0.00161	0.024875	g3411;g4738;g8362;g9206;g588;g1219;g3140;g6204;g7915
78	GO:0101003	ficolin-1-rich granule membrane	5 (0.57%)	9 (0.12%)	0.001617	0.024875	g6565;g7576;g8226;g1718;g6888
79	GO:0098687	chromosomal region	64 (7.36%)	392 (5.14%)	0.001659	0.025195	g618;g719;g728;g749;g789;g1278;g1462;g1713;g2534;g2679;g2929;g3125;g3335;g3407;g3411;g3427;g3537;g3875;g4067;g4174;g4665;g4738;g5400;g6029;g6074;g6170;g6379;g6572;g6670;g6776;g6780;g6839;g7687;g7810;g7866;g7877;g8065;g8362;g8657;g8727;g8873;g9206;g9612;g9793;g9853;g10112;g1255;g4974;g6066;g6838;g654;g1256;g3207;g4368;g4793;g4863;g6067;g6204;g6888;g7015;g7475;g8380;g8574;g8941
80	GO:0030659	cytoplasmic vesicle membrane	44 (5.06%)	249 (3.26%)	0.00187	0.027987	g103;g384;g749;g806;g1008;g1335;g1554;g1794;g1935;g1938;g2295;g2388;g2693;g2707;g3339;g3444;g4205;g4584;g5429;g5621;g5622;g5984;g6303;g6470;g6565;g6681;g7576;g7629;g7781;g8226;g9021;g9198;g10261;g10536;g2743;g10173;g1169;g1718;g4841;g5609;g5620;g6888;g7939;g8195
81	GO:0098805	whole membrane	134 (15.4%)	934 (12.24%)	0.001889	0.027987	g63;g103;g384;g615;g749;g765;g771;g806;g932;g1008;g1192;g1380;g1493;g1554;g1794;g1845;g1878;g1935;g1938;g2004;g2028;g2295;g2388;g2693;g2714;g2763;g2882;g3339;g3344;g3384;g3429;g3445;g3455;g3478;g3627;g3725;g4178;g4205;g4340;g4576;g4584;g4805;g4952;g5089;g5203;g5356;g5375;g5429;g5467;g5485;g5545;g5554;g5621;g5622;g5627;g5650;g5651;g5730;g5984;g6007;g6032;g6093;g6303;g6358;g6470;g6565;g6681;g6775;g…
82	GO:0061497	inner plaque of mitotic spindle pole body	4 (0.46%)	6 (0.08%)	0.002082	0.030465	g1758;g5621;g5622;g5620
83	GO:0005794	Golgi apparatus	89 (10.23%)	585 (7.67%)	0.002156	0.031175	g63;g103;g175;g201;g496;g509;g749;g806;g807;g1008;g1107;g1554;g1600;g1637;g1878;g2136;g2270;g2388;g2763;g2967;g3312;g3362;g3377;g3384;g3725;g4205;g4366;g4584;g4680;g4777;g4952;g5429;g5866;g5971;g5984;g6007;g6303;g6385;g6470;g6565;g6681;g6813;g7028;g7391;g7513;g7528;g7629;g7809;g7949;g7951;g7952;g8196;g8362;g8568;g8605;g8654;g8735;g9021;g9167;g9198;g9318;g10030;g10261;g10601;g10650;g1255;g7474;g59…
84	GO:1902494	catalytic complex	193 (22.18%)	1415 (18.54%)	0.002247	0.032098	g99;g198;g201;g294;g384;g496;g502;g655;g657;g710;g728;g749;g784;g829;g1008;g1193;g1398;g1462;g1480;g1500;g1691;g1713;g1881;g1911;g1938;g1948;g1964;g2249;g2251;g2295;g2376;g2473;g2623;g2661;g2781;g2882;g3074;g3125;g3216;g3310;g3343;g3396;g3410;g3411;g3419;g3421;g3486;g3831;g3875;g3882;g4417;g4427;g4517;g4523;g4545;g4557;g4565;g4733;g4952;g4995;g5219;g5275;g5398;g5400;g5429;g5467;g5554;g5608;g5627;…
85	GO:1990391	DNA repair complex	27 (3.1%)	135 (1.77%)	0.002366	0.033402	g294;g728;g1713;g1964;g3125;g3407;g3419;g3486;g4893;g5275;g5467;g6621;g7028;g7748;g7866;g8525;g8568;g9230;g10227;g10255;g10666;g3420;g3887;g5563;g1835;g2579;g6917
86	GO:0000792	heterochromatin	19 (2.18%)	84 (1.1%)	0.002411	0.033636	g294;g784;g955;g1278;g2679;g2781;g3183;g4174;g5400;g6285;g6780;g7877;g8362;g8657;g8727;g8873;g9853;g8380;g8567
87	GO:0010494	cytoplasmic stress granule	16 (1.84%)	66 (0.86%)	0.002461	0.033942	g294;g655;g719;g1893;g3853;g5113;g5137;g6007;g6771;g6842;g8764;g8873;g3342;g594;g5196;g8993
88	GO:0031618	nuclear pericentric heterochromatin	7 (0.8%)	18 (0.24%)	0.0025	0.034092	g4174;g5400;g6780;g8657;g8873;g9853;g8380
89	GO:0044451	nucleoplasm part	123 (14.14%)	856 (11.22%)	0.002782	0.037506	g198;g710;g719;g728;g753;g873;g1015;g1691;g1752;g1911;g1948;g2111;g2249;g2251;g2376;g2521;g2697;g2724;g2781;g3216;g3343;g3384;g3407;g3455;g3482;g3537;g3875;g3882;g4067;g4417;g4433;g4523;g4565;g4897;g5113;g5137;g5275;g5400;g5651;g5953;g6018;g6029;g6170;g6289;g6327;g6422;g6437;g6670;g6759;g6780;g6840;g6899;g6919;g7283;g7290;g7304;g7319;g7687;g7748;g7810;g7877;g7951;g8007;g8226;g8362;g8503;g8508;g86…
90	GO:0031519	PcG protein complex	8 (0.92%)	23 (0.3%)	0.00282	0.037597	g784;g2473;g2781;g4842;g7283;g8503;g5160;g7475
91	GO:0000151	ubiquitin ligase complex	40 (4.6%)	226 (2.96%)	0.002864	0.037632	g496;g502;g655;g784;g1193;g1480;g1964;g2251;g2473;g2781;g3831;g4517;g4545;g4733;g5219;g5275;g5398;g5400;g6098;g6788;g7028;g7748;g7878;g8503;g8508;g8525;g8822;g9853;g10255;g1834;g711;g1226;g1835;g5794;g5819;g6036;g7680;g8430;g8738;g10390
92	GO:0070822	Sin3-type complex	6 (0.69%)	14 (0.18%)	0.002885	0.037632	g198;g1911;g2376;g4417;g6840;g7475
93	GO:0009279	cell outer membrane	11 (1.26%)	39 (0.51%)	0.003271	0.042201	g69;g201;g2625;g2711;g5429;g8233;g8640;g9033;g9214;g3451;g6359
94	GO:0005700	polytene chromosome	29 (3.33%)	153 (2%)	0.003825	0.048381	g618;g1278;g1462;g1948;g2249;g2679;g3125;g3375;g3875;g4067;g4531;g6029;g6776;g6780;g7687;g7877;g8657;g8727;g9206;g9675;g9791;g10599;g1834;g654;g3207;g4739;g5160;g7475;g8574
95	GO:0097223	sperm part	13 (1.49%)	51 (0.67%)	0.00383	0.048381	g294;g4226;g5429;g5621;g5622;g6354;g760;g1194;g4169;g5620;g6416;g10031;g10302
96	GO:0048471	perinuclear region of cytoplasm	49 (5.63%)	295 (3.87%)	0.003968	0.049601	g103;g294;g496;g765;g1015;g1335;g1464;g1600;g1637;g1878;g1893;g2295;g2763;g3312;g3356;g3377;g3422;g3800;g4204;g4517;g5113;g5554;g5621;g5622;g6800;g6842;g7028;g7319;g7629;g7877;g8196;g8607;g8638;g9021;g9167;g1255;g2743;g1256;g4169;g4841;g5609;g5620;g6308;g6770;g8064;g8430;g8738;g9022;g10302
ACQ-VS-NCQ significant and enrichment GO (Molecular Function)
#	GO ID	Description	GeneRatio (918)	BgRatio (8300)	pvalue	p.adjust	geneID
1	GO:0005515	protein binding	558 (60.78%)	4138 (49.86%)	1.18725e-12	1.32376e-09	g19;g63;g69;g73;g83;g99;g103;g198;g201;g294;g308;g384;g496;g509;g527;g563;g618;g624;g655;g657;g710;g719;g728;g749;g753;g757;g765;g771;g784;g789;g806;g829;g929;g932;g955;g1008;g1015;g1049;g1192;g1193;g1217;g1221;g1278;g1335;g1362;g1462;g1480;g1493;g1495;g1499;g1500;g1554;g1588;g1600;g1631;g1637;g1691;g1713;g1716;g1717;g1733;g1752;g1758;g1761;g1794;g1845;g1878;g1881;g1889;g1890;g1893;g1911;g1935;g1…
2	GO:0005488	binding	796 (86.71%)	6483 (78.11%)	1.52156e-12	1.32376e-09	g19;g41;g63;g69;g73;g83;g95;g99;g103;g175;g198;g201;g294;g308;g316;g384;g496;g497;g509;g514;g522;g527;g563;g579;g580;g615;g618;g624;g655;g657;g710;g719;g728;g749;g753;g757;g765;g771;g784;g789;g806;g807;g829;g832;g873;g929;g932;g945;g955;g1008;g1015;g1049;g1107;g1192;g1193;g1217;g1221;g1278;g1292;g1335;g1362;g1365;g1380;g1398;g1462;g1464;g1480;g1493;g1495;g1499;g1500;g1524;g1554;g1588;g1600;g1631;…
3	GO:0019899	enzyme binding	162 (17.65%)	994 (11.98%)	5.95435e-08	3.5e-05	g63;g69;g103;g384;g496;g527;g624;g655;g710;g806;g932;g1015;g1192;g1193;g1335;g1493;g1588;g1600;g1631;g1637;g1713;g1761;g1881;g1965;g1971;g2028;g2067;g2111;g2136;g2206;g2247;g2249;g2295;g2670;g2693;g2697;g2733;g2763;g2781;g2865;g2882;g2929;g2967;g3090;g3117;g3144;g3281;g3312;g3343;g3344;g3362;g3384;g3411;g3429;g3445;g3455;g3478;g3853;g3875;g3938;g4138;g4340;g4545;g4805;g4993;g5113;g5139;g5275;g537…
4	GO:0016740	transferase activity	258 (28.1%)	1798 (21.66%)	1e-06	0.000265	g63;g69;g175;g213;g384;g496;g502;g514;g522;g527;g624;g710;g789;g873;g932;g1008;g1107;g1192;g1292;g1362;g1398;g1464;g1500;g1713;g1881;g1938;g1964;g2004;g2005;g2025;g2067;g2251;g2368;g2473;g2625;g2680;g2723;g2733;g2742;g2781;g2929;g2980;g3094;g3117;g3220;g3281;g3310;g3318;g3344;g3345;g3362;g3376;g3377;g3384;g3410;g3419;g3422;g3456;g3486;g3526;g3537;g3564;g3701;g3853;g3875;g3882;g3886;g3938;g3987;g4…
5	GO:0004674	protein serine/threonine kinase activity	50 (5.45%)	238 (2.87%)	5e-06	0.001481	g63;g789;g1008;g1192;g1362;g1881;g2067;g2368;g3117;g3281;g3377;g3384;g3456;g3537;g3701;g3853;g3882;g3938;g4301;g4738;g4897;g4989;g5831;g6015;g6029;g6285;g6899;g7635;g8117;g8299;g8362;g8801;g9206;g9760;g9805;g9994;g10112;g10227;g10564;g10666;g526;g2854;g3202;g5563;g7686;g3477;g6035;g8941;g9203;g9995
6	GO:0044877	macromolecular complex binding	163 (17.76%)	1072 (12.92%)	5e-06	0.001481	g198;g201;g294;g308;g719;g728;g749;g765;g771;g929;g955;g1278;g1462;g1464;g1493;g1499;g1500;g1588;g1637;g1713;g1752;g1758;g1761;g1819;g1845;g1890;g2013;g2067;g2206;g2249;g2295;g2392;g2670;g2680;g2742;g2781;g3094;g3260;g3335;g3375;g3384;g3411;g3419;g3421;g3486;g3725;g3875;g3987;g4174;g4340;g4523;g4531;g4565;g4738;g4842;g4859;g4989;g5089;g5137;g5203;g5275;g5467;g5626;g5627;g5651;g5953;g6007;g6018;g6…
7	GO:0031267	small GTPase binding	52 (5.66%)	255 (3.07%)	7e-06	0.001823	g63;g384;g527;g624;g710;g932;g1015;g1192;g1493;g1631;g1965;g1971;g2136;g2249;g2693;g2733;g2763;g2882;g2967;g3144;g3312;g3343;g3429;g3445;g3478;g3853;g4805;g5139;g5375;g5862;g6015;g6273;g6523;g6982;g7315;g7635;g7781;g8229;g9021;g10012;g526;g7227;g591;g1283;g2128;g4807;g6415;g7015;g8495;g9807;g10031;g10302
8	GO:0034595	phosphatidylinositol phosphate 5-phosphatase activity	6 (0.65%)	7 (0.08%)	1.1e-05	0.002488	g765;g4952;g5651;g7629;g9820;g10601
9	GO:0017016	Ras GTPase binding	49 (5.34%)	240 (2.89%)	1.3e-05	0.002512	g63;g384;g527;g624;g710;g932;g1015;g1192;g1493;g1965;g1971;g2136;g2249;g2693;g2733;g2763;g2882;g2967;g3144;g3312;g3343;g3429;g3445;g3478;g3853;g4805;g5139;g5375;g5862;g6015;g6273;g6982;g7315;g7635;g7781;g8229;g9021;g10012;g526;g7227;g591;g1283;g2128;g4807;g7015;g8495;g9807;g10031;g10302
10	GO:0019787	ubiquitin-like protein transferase activity	48 (5.23%)	239 (2.88%)	2.5e-05	0.00435	g496;g502;g522;g1398;g1964;g2251;g2680;g2781;g2980;g3422;g3882;g4138;g4226;g4433;g4517;g4545;g4680;g5132;g5275;g5393;g5400;g5626;g6032;g6098;g6170;g6340;g6780;g7028;g7087;g7748;g7781;g8226;g8496;g8508;g8525;g8778;g9853;g9960;g10227;g10255;g594;g711;g1226;g1835;g3766;g7915;g8738;g10390
11	GO:0042393	histone binding	25 (2.72%)	98 (1.18%)	4.4e-05	0.006902	g198;g618;g1499;g1500;g1890;g2206;g3375;g3407;g3882;g3987;g4523;g5626;g6327;g7290;g7748;g8065;g8657;g9113;g9254;g9675;g5026;g6386;g654;g6375;g10145
12	GO:0005524	ATP binding	175 (19.06%)	1213 (14.61%)	5.3e-05	0.00722	g63;g73;g95;g294;g316;g514;g522;g527;g657;g728;g749;g789;g832;g873;g1008;g1192;g1278;g1362;g1365;g1464;g1499;g1500;g1600;g1819;g1881;g2004;g2028;g2368;g2392;g2623;g2625;g2858;g2864;g2976;g3074;g3094;g3117;g3125;g3281;g3310;g3318;g3335;g3377;g3384;g3410;g3411;g3419;g3427;g3428;g3445;g3456;g3486;g3564;g3701;g3882;g3938;g4215;g4301;g4316;g4427;g4531;g4592;g4897;g4989;g4995;g5137;g5393;g5467;g5650;g5…
13	GO:0051020	GTPase binding	56 (6.1%)	301 (3.63%)	5.4e-05	0.00722	g63;g69;g384;g527;g624;g710;g932;g1015;g1192;g1493;g1631;g1965;g1971;g2136;g2249;g2670;g2693;g2733;g2763;g2882;g2967;g3144;g3312;g3343;g3429;g3445;g3478;g3853;g4805;g5139;g5375;g5862;g6015;g6273;g6523;g6982;g7315;g7635;g7781;g8229;g9021;g10012;g10650;g526;g3342;g7227;g591;g1283;g2128;g4807;g6415;g7015;g8495;g9807;g10031;g10302
14	GO:0043168	anion binding	244 (26.58%)	1787 (21.53%)	6.6e-05	0.007739	g63;g73;g95;g198;g294;g316;g384;g514;g522;g527;g615;g657;g728;g749;g771;g789;g832;g873;g929;g1008;g1015;g1107;g1192;g1278;g1362;g1365;g1380;g1464;g1499;g1500;g1600;g1819;g1877;g1881;g2004;g2013;g2025;g2028;g2295;g2368;g2392;g2623;g2625;g2742;g2858;g2864;g2976;g3074;g3094;g3117;g3125;g3281;g3310;g3318;g3335;g3339;g3344;g3345;g3377;g3384;g3410;g3411;g3419;g3427;g3428;g3445;g3447;g3456;g3486;g3564;g…
15	GO:0052866	phosphatidylinositol phosphate phosphatase activity	8 (0.87%)	15 (0.18%)	6.9e-05	0.007739	g765;g4952;g5651;g5730;g7629;g9173;g9820;g10601
16	GO:0043167	ion binding	407 (44.34%)	3194 (38.48%)	7.1e-05	0.007739	g19;g63;g69;g73;g83;g95;g175;g198;g294;g316;g384;g514;g522;g527;g579;g580;g615;g657;g728;g749;g765;g771;g784;g789;g829;g832;g873;g929;g945;g1008;g1015;g1107;g1192;g1217;g1278;g1362;g1365;g1380;g1398;g1464;g1495;g1499;g1500;g1554;g1600;g1637;g1713;g1819;g1877;g1881;g1890;g1938;g1964;g2004;g2013;g2025;g2028;g2110;g2249;g2251;g2270;g2295;g2368;g2376;g2392;g2473;g2623;g2625;g2679;g2680;g2733;g2742;g2…
17	GO:0032559	adenyl ribonucleotide binding	177 (19.28%)	1239 (14.93%)	8.3e-05	0.008516	g63;g73;g95;g294;g316;g514;g522;g527;g657;g728;g749;g789;g832;g873;g1008;g1192;g1278;g1362;g1365;g1464;g1499;g1500;g1600;g1819;g1881;g2004;g2028;g2368;g2392;g2623;g2625;g2858;g2864;g2976;g3074;g3094;g3117;g3125;g3281;g3310;g3318;g3335;g3377;g3384;g3410;g3411;g3419;g3427;g3428;g3445;g3456;g3486;g3564;g3701;g3882;g3938;g4215;g4301;g4316;g4427;g4531;g4592;g4897;g4989;g4995;g5137;g5393;g5467;g5650;g5…
18	GO:0016772	transferase activity, transferring phosphorus-containing groups	128 (13.94%)	851 (10.25%)	0.000104	0.01006	g63;g384;g514;g527;g710;g789;g873;g932;g1008;g1107;g1192;g1362;g1464;g1500;g1713;g1881;g1938;g2004;g2067;g2368;g2625;g2742;g3094;g3117;g3220;g3281;g3310;g3318;g3344;g3377;g3384;g3410;g3419;g3456;g3486;g3537;g3564;g3701;g3853;g3882;g3886;g3938;g4301;g4340;g4592;g4738;g4897;g4989;g4993;g5268;g5393;g5467;g5554;g5650;g5793;g5831;g6015;g6029;g6041;g6128;g6285;g6289;g6303;g6621;g6637;g6759;g6766;g6899;…
19	GO:0030554	adenyl nucleotide binding	177 (19.28%)	1247 (15.02%)	0.000119	0.010754	g63;g73;g95;g294;g316;g514;g522;g527;g657;g728;g749;g789;g832;g873;g1008;g1192;g1278;g1362;g1365;g1464;g1499;g1500;g1600;g1819;g1881;g2004;g2028;g2368;g2392;g2623;g2625;g2858;g2864;g2976;g3074;g3094;g3117;g3125;g3281;g3310;g3318;g3335;g3377;g3384;g3410;g3411;g3419;g3427;g3428;g3445;g3456;g3486;g3564;g3701;g3882;g3938;g4215;g4301;g4316;g4427;g4531;g4592;g4897;g4989;g4995;g5137;g5393;g5467;g5650;g5…
20	GO:0016301	kinase activity	90 (9.8%)	560 (6.75%)	0.000124	0.010754	g63;g384;g514;g527;g710;g789;g932;g1008;g1107;g1192;g1362;g1881;g2067;g2368;g3094;g3117;g3281;g3318;g3344;g3377;g3384;g3419;g3456;g3486;g3537;g3701;g3853;g3882;g3938;g4301;g4592;g4738;g4897;g4989;g5268;g5467;g5650;g5793;g5831;g6015;g6029;g6041;g6128;g6285;g6289;g6303;g6621;g6637;g6759;g6766;g6899;g7629;g7635;g8117;g8233;g8299;g8362;g8568;g8607;g8801;g9167;g9206;g9638;g9760;g9765;g9805;g9994;g1011…
21	GO:0003723	RNA binding	141 (15.36%)	960 (11.57%)	0.000141	0.011691	g41;g103;g294;g497;g655;g719;g749;g753;g765;g873;g929;g945;g1015;g1292;g1365;g1464;g1500;g1524;g1717;g1742;g1752;g1758;g1761;g1819;g1877;g1893;g2067;g2111;g2247;g2742;g2781;g3125;g3183;g3208;g3343;g3356;g3411;g3421;g3422;g3486;g4067;g4340;g4427;g4792;g4973;g4993;g4995;g5113;g5137;g5203;g5219;g5336;g5650;g5763;g6007;g6025;g6074;g6284;g6509;g6621;g6670;g6759;g6771;g6842;g6924;g7304;g7308;g7736;g778…
22	GO:0051864	histone demethylase activity (H3-K36 specific)	4 (0.44%)	4 (0.05%)	0.000149	0.011767	g579;g580;g2473;g9272
23	GO:0004672	protein kinase activity	60 (6.54%)	344 (4.14%)	0.000196	0.014825	g63;g514;g527;g789;g1008;g1192;g1362;g1881;g2067;g2368;g3117;g3281;g3377;g3384;g3456;g3537;g3701;g3853;g3882;g3938;g4301;g4738;g4897;g4989;g5268;g5793;g5831;g6015;g6029;g6285;g6289;g6766;g6899;g7635;g8117;g8233;g8299;g8362;g8801;g9206;g9760;g9805;g9994;g10112;g10227;g10270;g10564;g10666;g526;g2854;g3202;g5563;g7686;g3311;g3477;g6035;g6378;g8941;g9203;g9995
24	GO:0032549	ribonucleoside binding	189 (20.59%)	1364 (16.43%)	0.000261	0.018933	g63;g73;g95;g294;g316;g514;g522;g527;g657;g728;g749;g789;g832;g873;g929;g1008;g1015;g1192;g1278;g1362;g1365;g1464;g1499;g1500;g1600;g1819;g1881;g1938;g2004;g2028;g2368;g2392;g2623;g2625;g2742;g2858;g2864;g2976;g3074;g3094;g3117;g3125;g3281;g3310;g3318;g3335;g3377;g3384;g3410;g3411;g3419;g3427;g3428;g3445;g3456;g3486;g3564;g3620;g3701;g3882;g3938;g4215;g4301;g4316;g4340;g4427;g4531;g4592;g4897;g49…
25	GO:0001882	nucleoside binding	189 (20.59%)	1366 (16.46%)	0.000283	0.019702	g63;g73;g95;g294;g316;g514;g522;g527;g657;g728;g749;g789;g832;g873;g929;g1008;g1015;g1192;g1278;g1362;g1365;g1464;g1499;g1500;g1600;g1819;g1881;g1938;g2004;g2028;g2368;g2392;g2623;g2625;g2742;g2858;g2864;g2976;g3074;g3094;g3117;g3125;g3281;g3310;g3318;g3335;g3377;g3384;g3410;g3411;g3419;g3427;g3428;g3445;g3456;g3486;g3564;g3620;g3701;g3882;g3938;g4215;g4301;g4316;g4340;g4427;g4531;g4592;g4897;g49…
26	GO:0008047	enzyme activator activity	44 (4.79%)	236 (2.84%)	0.000319	0.021087	g929;g1554;g1881;g1965;g1991;g2013;g2067;g2206;g2670;g2882;g3090;g3312;g3407;g3445;g3455;g3537;g3945;g4523;g4805;g4842;g5466;g6015;g6018;g6203;g6800;g6815;g6982;g7391;g7781;g8229;g8607;g9173;g1056;g4732;g591;g1849;g1902;g4739;g4862;g5616;g7915;g7939;g9203;g9807
27	GO:0034593	phosphatidylinositol bisphosphate phosphatase activity	7 (0.76%)	14 (0.17%)	0.000337	0.021087	g765;g4952;g5651;g5730;g7629;g9173;g10601
28	GO:0035639	purine ribonucleoside triphosphate binding	187 (20.37%)	1354 (16.31%)	0.000339	0.021087	g63;g73;g95;g294;g316;g514;g522;g527;g657;g728;g749;g789;g832;g873;g929;g1008;g1015;g1192;g1278;g1362;g1365;g1464;g1499;g1500;g1600;g1819;g1881;g2004;g2028;g2368;g2392;g2623;g2625;g2742;g2858;g2864;g2976;g3074;g3094;g3117;g3125;g3281;g3310;g3318;g3335;g3377;g3384;g3410;g3411;g3419;g3427;g3428;g3445;g3456;g3486;g3564;g3620;g3701;g3882;g3938;g4215;g4301;g4316;g4340;g4427;g4531;g4592;g4897;g4989;g49…
29	GO:0004842	ubiquitin-protein transferase activity	42 (4.58%)	225 (2.71%)	0.000422	0.025089	g496;g502;g522;g1398;g1964;g2251;g2680;g2781;g2980;g3422;g3882;g4138;g4226;g4433;g4517;g4545;g4680;g5132;g5275;g5400;g6032;g6098;g6170;g6340;g7028;g7087;g7748;g8226;g8508;g8525;g8778;g9853;g9960;g10227;g10255;g594;g711;g1226;g1835;g3766;g8738;g10390
30	GO:0001883	purine nucleoside binding	187 (20.37%)	1361 (16.4%)	0.000447	0.025089	g63;g73;g95;g294;g316;g514;g522;g527;g657;g728;g749;g789;g832;g873;g929;g1008;g1015;g1192;g1278;g1362;g1365;g1464;g1499;g1500;g1600;g1819;g1881;g2004;g2028;g2368;g2392;g2623;g2625;g2742;g2858;g2864;g2976;g3074;g3094;g3117;g3125;g3281;g3310;g3318;g3335;g3377;g3384;g3410;g3411;g3419;g3427;g3428;g3445;g3456;g3486;g3564;g3620;g3701;g3882;g3938;g4215;g4301;g4316;g4340;g4427;g4531;g4592;g4897;g4989;g49…
31	GO:0032550	purine ribonucleoside binding	187 (20.37%)	1361 (16.4%)	0.000447	0.025089	g63;g73;g95;g294;g316;g514;g522;g527;g657;g728;g749;g789;g832;g873;g929;g1008;g1015;g1192;g1278;g1362;g1365;g1464;g1499;g1500;g1600;g1819;g1881;g2004;g2028;g2368;g2392;g2623;g2625;g2742;g2858;g2864;g2976;g3074;g3094;g3117;g3125;g3281;g3310;g3318;g3335;g3377;g3384;g3410;g3411;g3419;g3427;g3428;g3445;g3456;g3486;g3564;g3620;g3701;g3882;g3938;g4215;g4301;g4316;g4340;g4427;g4531;g4592;g4897;g4989;g49…
32	GO:0032555	purine ribonucleotide binding	189 (20.59%)	1381 (16.64%)	0.00051	0.027725	g63;g73;g95;g294;g316;g514;g522;g527;g657;g728;g749;g789;g832;g873;g929;g1008;g1015;g1192;g1278;g1362;g1365;g1464;g1499;g1500;g1600;g1819;g1881;g2004;g2028;g2368;g2392;g2623;g2625;g2742;g2858;g2864;g2976;g3074;g3094;g3117;g3125;g3281;g3310;g3318;g3335;g3377;g3384;g3410;g3411;g3419;g3427;g3428;g3445;g3456;g3486;g3564;g3620;g3701;g3882;g3938;g4215;g4301;g4316;g4340;g4427;g4531;g4592;g4897;g4989;g49…
33	GO:0017076	purine nucleotide binding	189 (20.59%)	1391 (16.76%)	0.000743	0.039179	g63;g73;g95;g294;g316;g514;g522;g527;g657;g728;g749;g789;g832;g873;g929;g1008;g1015;g1192;g1278;g1362;g1365;g1464;g1499;g1500;g1600;g1819;g1881;g2004;g2028;g2368;g2392;g2623;g2625;g2742;g2858;g2864;g2976;g3074;g3094;g3117;g3125;g3281;g3310;g3318;g3335;g3377;g3384;g3410;g3411;g3419;g3427;g3428;g3445;g3456;g3486;g3564;g3620;g3701;g3882;g3938;g4215;g4301;g4316;g4340;g4427;g4531;g4592;g4897;g4989;g49…
34	GO:0043130	ubiquitin binding	22 (2.4%)	98 (1.18%)	0.00085	0.042808	g1008;g1588;g2388;g2697;g3422;g3898;g4552;g4733;g5275;g6815;g7028;g7290;g7319;g7748;g8496;g8607;g10246;g10270;g1170;g5794;g9067;g9200
35	GO:0061659	ubiquitin-like protein ligase activity	34 (3.7%)	177 (2.13%)	0.000861	0.042808	g502;g522;g1398;g1964;g2251;g2680;g2781;g2980;g3422;g4138;g4226;g4433;g4545;g5132;g5275;g5400;g5626;g6098;g6170;g6340;g6780;g7028;g8496;g8508;g8525;g8778;g9853;g9960;g10255;g594;g711;g1226;g1835;g10390
36	GO:0032553	ribonucleotide binding	189 (20.59%)	1396 (16.82%)	0.000893	0.043154	g63;g73;g95;g294;g316;g514;g522;g527;g657;g728;g749;g789;g832;g873;g929;g1008;g1015;g1192;g1278;g1362;g1365;g1464;g1499;g1500;g1600;g1819;g1881;g2004;g2028;g2368;g2392;g2623;g2625;g2742;g2858;g2864;g2976;g3074;g3094;g3117;g3125;g3281;g3310;g3318;g3335;g3377;g3384;g3410;g3411;g3419;g3427;g3428;g3445;g3456;g3486;g3564;g3620;g3701;g3882;g3938;g4215;g4301;g4316;g4340;g4427;g4531;g4592;g4897;g4989;g49…
37	GO:0017137	Rab GTPase binding	23 (2.51%)	105 (1.27%)	0.000939	0.043712	g63;g384;g2136;g2249;g2693;g2763;g2882;g2967;g3312;g3429;g3445;g3478;g5375;g5862;g6982;g8229;g9021;g7227;g591;g8495;g9807;g10031;g10302
38	GO:0005543	phospholipid binding	34 (3.7%)	178 (2.14%)	0.000955	0.043712	g198;g384;g615;g771;g1107;g1380;g2013;g2295;g2742;g3339;g3344;g4271;g4576;g4641;g4805;g4828;g5730;g6893;g6944;g6990;g7629;g8496;g8766;g8973;g9548;g9779;g10246;g10447;g10536;g1256;g3477;g4739;g6445;g7939
39	GO:0032182	ubiquitin-like protein binding	24 (2.61%)	112 (1.35%)	0.00102	0.045509	g1008;g1217;g1588;g2388;g2697;g3422;g3898;g4552;g4733;g5275;g6815;g7028;g7290;g7319;g7748;g8496;g8607;g10246;g10270;g1170;g5794;g7915;g9067;g9200
40	GO:0017048	Rho GTPase binding	17 (1.85%)	70 (0.84%)	0.001288	0.05459	g527;g624;g710;g1192;g1493;g1965;g2733;g4805;g6015;g6273;g6982;g7315;g7635;g526;g1283;g2128;g7015
41	GO:0008705	methionine synthase activity	3 (0.33%)	3 (0.04%)	0.001349	0.05459	g213;g624;g214
42	GO:0042084	5-methyltetrahydrofolate-dependent methyltransferase activity	3 (0.33%)	3 (0.04%)	0.001349	0.05459	g213;g624;g214
43	GO:0043813	phosphatidylinositol-3,5-bisphosphate 5-phosphatase activity	3 (0.33%)	3 (0.04%)	0.001349	0.05459	g765;g4952;g7629
44	GO:0097367	carbohydrate derivative binding	203 (22.11%)	1531 (18.45%)	0.001645	0.065054	g63;g73;g95;g294;g316;g514;g522;g527;g657;g728;g749;g789;g832;g873;g929;g1008;g1015;g1192;g1278;g1362;g1365;g1464;g1499;g1500;g1600;g1819;g1881;g1938;g2004;g2013;g2028;g2368;g2392;g2623;g2625;g2742;g2858;g2864;g2976;g3074;g3094;g3117;g3125;g3281;g3310;g3318;g3335;g3377;g3384;g3410;g3411;g3419;g3427;g3428;g3445;g3447;g3456;g3486;g3564;g3620;g3701;g3882;g3938;g4145;g4215;g4301;g4316;g4340;g4427;g45…
45	GO:0016773	phosphotransferase activity, alcohol group as acceptor	76 (8.28%)	496 (5.98%)	0.001705	0.065149	g63;g384;g514;g527;g789;g1008;g1192;g1362;g1881;g2067;g2368;g3094;g3117;g3281;g3377;g3384;g3456;g3486;g3537;g3701;g3853;g3882;g3938;g4301;g4592;g4738;g4897;g4989;g5268;g5793;g5831;g6015;g6029;g6041;g6285;g6289;g6303;g6766;g6899;g7629;g7635;g8117;g8233;g8299;g8362;g8568;g8801;g9167;g9206;g9638;g9760;g9805;g9994;g10112;g10227;g10270;g10564;g10666;g526;g2854;g3202;g3466;g4974;g5195;g5563;g7686;g1309…
46	GO:0003682	chromatin binding	62 (6.75%)	389 (4.69%)	0.001734	0.065149	g198;g294;g719;g728;g955;g1278;g1462;g1499;g1500;g1713;g1890;g2206;g2249;g2680;g2781;g3375;g3411;g3875;g4174;g4531;g4565;g4842;g5137;g5626;g5953;g6018;g6128;g6284;g6776;g6780;g6839;g6842;g6899;g7591;g7687;g7748;g7810;g7866;g7877;g8065;g8657;g8873;g9254;g9675;g10070;g10128;g10447;g588;g1834;g3202;g6838;g654;g1170;g1985;g2579;g2937;g4368;g6035;g6375;g8567;g8574;g10008
47	GO:0070615	nucleosome-dependent ATPase activity	9 (0.98%)	27 (0.33%)	0.00176	0.065149	g73;g4557;g5953;g6018;g6780;g8657;g9011;g9254;g9793
48	GO:0019900	kinase binding	45 (4.9%)	264 (3.18%)	0.001937	0.070226	g103;g496;g1600;g1881;g2028;g2067;g2247;g2249;g2670;g2693;g2781;g3090;g3117;g3281;g3384;g3455;g3478;g4340;g4993;g5651;g5747;g6356;g6899;g7877;g8037;g9994;g10255;g10553;g10638;g1255;g1310;g3202;g5026;g654;g830;g1256;g1849;g1955;g3311;g4994;g5335;g6308;g7015;g8767;g9995
49	GO:0043021	ribonucleoprotein complex binding	38 (4.14%)	215 (2.59%)	0.002204	0.078279	g929;g1464;g1588;g1752;g1761;g1819;g2067;g2742;g3384;g3411;g3419;g3486;g3987;g4340;g4738;g4859;g5467;g5627;g6007;g6074;g6621;g6752;g6771;g7304;g7391;g8576;g8607;g8868;g10378;g3203;g3342;g3451;g1336;g3423;g4412;g5196;g5335;g8733
50	GO:0052745	inositol phosphate phosphatase activity	6 (0.65%)	14 (0.17%)	0.002469	0.081591	g765;g5651;g9173;g9820;g10104;g10601
51	GO:0003729	mRNA binding	44 (4.79%)	260 (3.13%)	0.002496	0.081591	g294;g497;g719;g945;g1717;g1752;g2111;g3125;g3356;g3411;g4067;g5203;g5219;g6007;g6025;g6284;g6670;g6771;g6842;g7304;g7736;g7866;g8576;g8764;g8873;g9218;g9231;g9612;g9791;g10128;g10226;g3342;g1291;g1337;g2319;g4369;g4478;g6035;g6204;g7159;g7160;g8064;g8080;g8993
52	GO:0044822	poly(A) RNA binding	44 (4.79%)	260 (3.13%)	0.002496	0.081591	g294;g497;g719;g945;g1717;g1752;g2111;g3125;g3356;g3411;g4067;g5203;g5219;g6007;g6025;g6284;g6670;g6771;g6842;g7304;g7736;g7866;g8576;g8764;g8873;g9218;g9231;g9612;g9791;g10128;g10226;g3342;g1291;g1337;g2319;g4369;g4478;g6035;g6204;g7159;g7160;g8064;g8080;g8993
53	GO:0003950	NAD+ ADP-ribosyltransferase activity	5 (0.54%)	10 (0.12%)	0.002561	0.081591	g69;g6379;g9869;g654;g1888
54	GO:0004402	histone acetyltransferase activity	11 (1.2%)	39 (0.47%)	0.002579	0.081591	g2929;g3875;g3882;g6295;g6759;g7687;g8508;g8735;g10009;g1170;g8038
55	GO:0005089	Rho guanyl-nucleotide exchange factor activity	11 (1.2%)	39 (0.47%)	0.002579	0.081591	g527;g624;g710;g2733;g4805;g6015;g6982;g7315;g526;g1283;g2128
56	GO:0008144	drug binding	129 (14.05%)	929 (11.19%)	0.002662	0.082724	g63;g73;g294;g657;g728;g749;g789;g832;g873;g1008;g1192;g1362;g1365;g1464;g1499;g1500;g1881;g2004;g2028;g2368;g2623;g2625;g2864;g3094;g3117;g3125;g3318;g3335;g3377;g3384;g3410;g3411;g3427;g3428;g3456;g3564;g3701;g3882;g3938;g4145;g4301;g4340;g4427;g4584;g4897;g4989;g4995;g5027;g5137;g5393;g5467;g5650;g5793;g5953;g6018;g6029;g6284;g6285;g6289;g6303;g6345;g6470;g6509;g6637;g6759;g6780;g6894;g6899;g6…
57	GO:0003713	transcription coactivator activity	28 (3.05%)	148 (1.78%)	0.002991	0.088629	g955;g1398;g1691;g3882;g5398;g5400;g5575;g6759;g7304;g7756;g8508;g8822;g8972;g9675;g3451;g6066;g711;g1170;g1336;g1337;g2269;g2579;g4862;g6067;g7475;g7727;g9022;g10390
58	GO:0010485	H4 histone acetyltransferase activity	7 (0.76%)	19 (0.23%)	0.003008	0.088629	g2929;g3875;g3882;g7687;g8735;g10009;g8038
59	GO:1990381	ubiquitin-specific protease binding	7 (0.76%)	19 (0.23%)	0.003008	0.088629	g103;g496;g1588;g4545;g5651;g7028;g8607
60	GO:0008536	Ran GTPase binding	9 (0.98%)	29 (0.35%)	0.003069	0.088629	g1015;g1971;g3144;g3343;g3853;g5139;g7781;g10012;g4807
61	GO:0005487	nucleocytoplasmic transporter activity	8 (0.87%)	24 (0.29%)	0.003157	0.088629	g1015;g3144;g3853;g5139;g5554;g5752;g10012;g4807
62	GO:0036094	small molecule binding	229 (24.95%)	1773 (21.36%)	0.003187	0.088629	g63;g73;g95;g294;g316;g514;g522;g527;g657;g728;g749;g789;g832;g873;g929;g1008;g1015;g1192;g1278;g1362;g1365;g1380;g1464;g1499;g1500;g1600;g1713;g1819;g1877;g1881;g1938;g2004;g2013;g2028;g2295;g2368;g2392;g2623;g2625;g2742;g2858;g2864;g2976;g3074;g3094;g3117;g3125;g3281;g3310;g3318;g3335;g3345;g3377;g3384;g3410;g3411;g3419;g3427;g3428;g3445;g3456;g3486;g3564;g3620;g3701;g3882;g3938;g4215;g4301;g43…
63	GO:0061733	peptide-lysine-N-acetyltransferase activity	11 (1.2%)	40 (0.48%)	0.003209	0.088629	g2929;g3875;g3882;g6295;g6759;g7687;g8508;g8735;g10009;g1170;g8038
64	GO:0032947	protein complex scaffold	12 (1.31%)	46 (0.55%)	0.003429	0.093214	g710;g1600;g2004;g3090;g3945;g5356;g8548;g8764;g9548;g1255;g1170;g1256
65	GO:0004438	phosphatidylinositol-3-phosphatase activity	4 (0.44%)	7 (0.08%)	0.003953	0.10265	g765;g4952;g5651;g5730
66	GO:0004709	MAP kinase kinase kinase activity	4 (0.44%)	7 (0.08%)	0.003953	0.10265	g3117;g3938;g9994;g9995
67	GO:0052744	phosphatidylinositol monophosphate phosphatase activity	4 (0.44%)	7 (0.08%)	0.003953	0.10265	g765;g4952;g5651;g5730
68	GO:0004702	receptor signaling protein serine/threonine kinase activity	7 (0.76%)	20 (0.24%)	0.004192	0.107278	g3117;g3701;g3938;g6899;g9994;g7686;g9995
69	GO:0000166	nucleotide binding	211 (22.98%)	1630 (19.64%)	0.004356	0.108982	g63;g73;g95;g294;g316;g514;g522;g527;g657;g728;g749;g789;g832;g873;g929;g1008;g1015;g1192;g1278;g1362;g1365;g1380;g1464;g1499;g1500;g1600;g1713;g1819;g1877;g1881;g2004;g2028;g2368;g2392;g2623;g2625;g2742;g2858;g2864;g2976;g3074;g3094;g3117;g3125;g3281;g3310;g3318;g3335;g3345;g3377;g3384;g3410;g3411;g3419;g3427;g3428;g3445;g3456;g3486;g3564;g3620;g3701;g3882;g3938;g4215;g4301;g4316;g4340;g4427;g45…
70	GO:0061630	ubiquitin protein ligase activity	30 (3.27%)	166 (2%)	0.004402	0.108982	g502;g522;g1398;g1964;g2251;g2680;g2781;g2980;g3422;g4138;g4226;g4433;g4545;g5132;g5275;g5400;g6098;g6340;g7028;g8508;g8525;g8778;g9853;g9960;g10255;g594;g711;g1226;g1835;g10390
71	GO:1901265	nucleoside phosphate binding	211 (22.98%)	1631 (19.65%)	0.004485	0.108982	g63;g73;g95;g294;g316;g514;g522;g527;g657;g728;g749;g789;g832;g873;g929;g1008;g1015;g1192;g1278;g1362;g1365;g1380;g1464;g1499;g1500;g1600;g1713;g1819;g1877;g1881;g2004;g2028;g2368;g2392;g2623;g2625;g2742;g2858;g2864;g2976;g3074;g3094;g3117;g3125;g3281;g3310;g3318;g3335;g3345;g3377;g3384;g3410;g3411;g3419;g3427;g3428;g3445;g3456;g3486;g3564;g3620;g3701;g3882;g3938;g4215;g4301;g4316;g4340;g4427;g45…
72	GO:0031369	translation initiation factor binding	10 (1.09%)	36 (0.43%)	0.00451	0.108982	g3208;g3281;g5113;g5203;g6771;g6990;g8764;g8868;g10378;g5196
73	GO:0004366	glycerol-3-phosphate O-acyltransferase activity	3 (0.33%)	4 (0.05%)	0.00495	0.110421	g6903;g10006;g9957
74	GO:0042328	heparan sulfate N-acetylglucosaminyltransferase activity	3 (0.33%)	4 (0.05%)	0.00495	0.110421	g7809;g7949;g7951
75	GO:0046030	inositol trisphosphate phosphatase activity	3 (0.33%)	4 (0.05%)	0.00495	0.110421	g765;g10104;g10601
76	GO:0050508	glucuronosyl-N-acetylglucosaminyl-proteoglycan 4-alpha-N-acetylglucosaminyltransferase activity	3 (0.33%)	4 (0.05%)	0.00495	0.110421	g7809;g7949;g7951
77	GO:0050509	N-acetylglucosaminyl-proteoglycan 4-beta-glucuronosyltransferase activity	3 (0.33%)	4 (0.05%)	0.00495	0.110421	g7809;g7949;g7951
78	GO:0052743	inositol tetrakisphosphate phosphatase activity	3 (0.33%)	4 (0.05%)	0.00495	0.110421	g765;g5651;g10104
79	GO:0043169	cation binding	240 (26.14%)	1886 (22.72%)	0.005386	0.117966	g19;g63;g69;g83;g175;g198;g522;g579;g580;g657;g765;g784;g829;g873;g945;g1192;g1217;g1362;g1380;g1398;g1464;g1495;g1554;g1637;g1713;g1881;g1890;g1938;g1964;g2004;g2013;g2025;g2028;g2110;g2249;g2251;g2270;g2295;g2368;g2376;g2473;g2623;g2679;g2680;g2733;g2781;g2976;g2980;g3117;g3281;g3339;g3343;g3344;g3375;g3410;g3411;g3422;g3445;g3447;g3537;g3886;g3938;g4138;g4161;g4178;g4226;g4301;g4433;g4517;g453…
80	GO:0052742	phosphatidylinositol kinase activity	6 (0.65%)	16 (0.19%)	0.005424	0.117966	g384;g1008;g6303;g7629;g8362;g9167
81	GO:0070566	adenylyltransferase activity	15 (1.63%)	67 (0.81%)	0.00557	0.119458	g873;g1464;g2004;g2625;g3410;g3564;g3886;g4340;g10343;g10378;g3342;g8643;g4412;g6031;g10303
82	GO:0008289	lipid binding	45 (4.9%)	279 (3.36%)	0.005681	0.119458	g198;g384;g615;g771;g1107;g1380;g1794;g2013;g2295;g2742;g3339;g3344;g4271;g4576;g4641;g4805;g4828;g5651;g5730;g5763;g6170;g6681;g6893;g6944;g6990;g7315;g7629;g8234;g8496;g8607;g8766;g8973;g9548;g9779;g10154;g10246;g10447;g10536;g1219;g1255;g1256;g3477;g4739;g6445;g7939
83	GO:0070034	telomerase RNA binding	7 (0.76%)	21 (0.25%)	0.005698	0.119458	g1761;g6074;g6842;g8068;g4793;g6204;g10537
84	GO:0016788	hydrolase activity, acting on ester bonds	99 (10.78%)	704 (8.48%)	0.005813	0.120404	g41;g294;g563;g728;g753;g765;g1088;g1637;g1713;g1761;g2120;g2376;g2623;g2858;g2864;g3074;g3117;g3125;g3281;g3343;g3411;g3419;g3428;g3447;g3455;g3486;g3529;g3800;g3886;g3945;g4427;g4844;g4893;g4952;g4995;g5025;g5118;g5137;g5467;g5651;g5730;g5747;g5763;g5818;g5866;g6074;g6102;g6295;g6470;g6489;g6621;g6775;g6842;g6894;g7528;g7629;g7866;g7916;g8037;g8233;g8365;g8568;g8732;g8822;g9173;g9221;g9230;g961…
85	GO:0019901	protein kinase binding	40 (4.36%)	243 (2.93%)	0.006241	0.127754	g103;g496;g1600;g1881;g2028;g2067;g2670;g2693;g2781;g3090;g3117;g3281;g3384;g3455;g3478;g4340;g4993;g5651;g5747;g6356;g6899;g7877;g8037;g9994;g10638;g1255;g1310;g5026;g654;g830;g1256;g1849;g1955;g3311;g4994;g5335;g6308;g7015;g8767;g9995
86	GO:0005048	signal sequence binding	11 (1.2%)	44 (0.53%)	0.007059	0.142812	g3411;g3853;g5139;g5554;g5752;g6621;g6752;g9198;g10261;g199;g4807
87	GO:0042162	telomeric DNA binding	9 (0.98%)	33 (0.4%)	0.00789	0.157807	g1761;g3407;g3411;g6074;g8299;g10128;g1255;g1256;g8064
88	GO:0008022	protein C-terminus binding	19 (2.07%)	97 (1.17%)	0.009059	0.179125	g103;g765;g1794;g2295;g2929;g3938;g6018;g6681;g8081;g9021;g10599;g3342;g4974;g6066;g2698;g5616;g6067;g7939;g9022
89	GO:0032452	histone demethylase activity	5 (0.54%)	13 (0.16%)	0.009851	0.190461	g579;g580;g2376;g2473;g9272
90	GO:0043495	protein anchor	5 (0.54%)	13 (0.16%)	0.009851	0.190461	g2247;g5621;g5622;g8640;g5620
91	GO:0046872	metal ion binding	233 (25.38%)	1851 (22.3%)	0.010441	0.196895	g19;g63;g69;g83;g175;g198;g522;g579;g580;g657;g765;g784;g829;g873;g945;g1192;g1217;g1362;g1380;g1398;g1464;g1495;g1554;g1637;g1713;g1890;g1938;g1964;g2004;g2028;g2110;g2249;g2251;g2270;g2295;g2368;g2376;g2473;g2623;g2679;g2680;g2733;g2781;g2976;g2980;g3117;g3281;g3339;g3343;g3344;g3375;g3410;g3411;g3422;g3445;g3447;g3537;g3886;g3938;g4138;g4161;g4178;g4226;g4301;g4433;g4517;g4531;g4545;g4552;g455…
92	GO:0030374	ligand-dependent nuclear receptor transcription coactivator activity	8 (0.87%)	29 (0.35%)	0.011187	0.196895	g5398;g5400;g5575;g8508;g9675;g1337;g2579;g4862
93	GO:0072341	modified amino acid binding	8 (0.87%)	29 (0.35%)	0.011187	0.196895	g2625;g4584;g4859;g7528;g9779;g3112;g4739;g7939
94	GO:0032453	histone demethylase activity (H3-K4 specific)	3 (0.33%)	5 (0.06%)	0.011357	0.196895	g2376;g2473;g9272
95	GO:0035091	phosphatidylinositol binding	21 (2.29%)	113 (1.36%)	0.011471	0.196895	g198;g384;g615;g1107;g1380;g2295;g3344;g4271;g4576;g4805;g4828;g5730;g6944;g7629;g8496;g8973;g10246;g10447;g3477;g6445;g7939
96	GO:0031593	polyubiquitin binding	9 (0.98%)	35 (0.42%)	0.011814	0.196895	g1588;g4733;g5275;g7319;g7748;g8607;g10270;g5794;g9200
97	GO:0005049	nuclear export signal receptor activity	4 (0.44%)	9 (0.11%)	0.011864	0.196895	g1015;g3144;g5752;g10012
98	GO:0019789	SUMO transferase activity	4 (0.44%)	9 (0.11%)	0.011864	0.196895	g6032;g6170;g7781;g7915
99	GO:0001888	glucuronyl-galactosyl-proteoglycan 4-alpha-N-acetylglucosaminyltransferase activity	2 (0.22%)	2 (0.02%)	0.012221	0.196895	g7949;g7951
100	GO:0004430	1-phosphatidylinositol 4-kinase activity	2 (0.22%)	2 (0.02%)	0.012221	0.196895	g6303;g9167
101	GO:0004445	inositol-polyphosphate 5-phosphatase activity	2 (0.22%)	2 (0.02%)	0.012221	0.196895	g10104;g10601
102	GO:0016314	phosphatidylinositol-3,4,5-trisphosphate 3-phosphatase activity	2 (0.22%)	2 (0.02%)	0.012221	0.196895	g5651;g10601
103	GO:0034594	phosphatidylinositol trisphosphate phosphatase activity	2 (0.22%)	2 (0.02%)	0.012221	0.196895	g5651;g10601
104	GO:0034647	histone demethylase activity (H3-trimethyl-K4 specific)	2 (0.22%)	2 (0.02%)	0.012221	0.196895	g2376;g2473
105	GO:0043812	phosphatidylinositol-4-phosphate phosphatase activity	2 (0.22%)	2 (0.02%)	0.012221	0.196895	g765;g4952
106	GO:0050816	phosphothreonine binding	2 (0.22%)	2 (0.02%)	0.012221	0.196895	g496;g1955
107	GO:0052658	inositol-1,4,5-trisphosphate 5-phosphatase activity	2 (0.22%)	2 (0.02%)	0.012221	0.196895	g765;g10104
108	GO:0070975	FHA domain binding	2 (0.22%)	2 (0.02%)	0.012221	0.196895	g6066;g6067
109	GO:0060589	nucleoside-triphosphatase regulator activity	28 (3.05%)	164 (1.98%)	0.012561	0.200512	g929;g1554;g1965;g1991;g2013;g2028;g2670;g2882;g3090;g3312;g3445;g3945;g4805;g5466;g6015;g6800;g6982;g7391;g7781;g7949;g8229;g9173;g1056;g4732;g591;g4807;g5616;g9807
110	GO:0001671	ATPase activator activity	6 (0.65%)	19 (0.23%)	0.013762	0.21573	g3945;g6800;g7391;g1056;g4732;g5616
111	GO:0008172	S-methyltransferase activity	6 (0.65%)	19 (0.23%)	0.013762	0.21573	g213;g624;g2733;g3345;g214;g7979
112	GO:0005088	Ras guanyl-nucleotide exchange factor activity	17 (1.85%)	88 (1.06%)	0.014999	0.23302	g527;g624;g710;g2249;g2733;g2967;g3429;g4805;g5375;g5862;g6015;g6982;g7315;g8229;g526;g1283;g2128
113	GO:0004197	cysteine-type endopeptidase activity	10 (1.09%)	43 (0.52%)	0.016714	0.257366	g1217;g4374;g4415;g5356;g8766;g10599;g760;g1902;g4695;g7728
114	GO:0009378	four-way junction helicase activity	12 (1.31%)	56 (0.67%)	0.017565	0.268094	g657;g749;g1500;g3074;g3310;g4427;g5650;g6621;g6759;g8607;g3887;g4732
115	GO:0070412	R-SMAD binding	4 (0.44%)	10 (0.12%)	0.018066	0.273348	g5763;g8732;g10070;g654
116	GO:0043022	ribosome binding	25 (2.72%)	147 (1.77%)	0.018497	0.277458	g929;g1588;g1819;g2067;g2742;g3384;g3419;g3486;g4340;g4859;g5467;g5627;g6007;g6621;g6752;g6771;g7391;g8868;g10378;g3203;g3342;g3423;g4412;g5335;g8733
117	GO:0008139	nuclear localization sequence binding	5 (0.54%)	15 (0.18%)	0.019061	0.283477	g3853;g5139;g5554;g5752;g4807
118	GO:0003824	catalytic activity	495 (53.92%)	4206 (50.67%)	0.020069	0.293675	g41;g63;g69;g73;g83;g95;g99;g175;g213;g294;g384;g496;g502;g514;g522;g527;g563;g579;g580;g624;g657;g710;g728;g749;g753;g765;g789;g807;g829;g873;g929;g932;g981;g1008;g1088;g1107;g1192;g1217;g1278;g1292;g1362;g1365;g1380;g1398;g1464;g1493;g1499;g1500;g1637;g1713;g1761;g1819;g1881;g1935;g1938;g1964;g1965;g2004;g2005;g2025;g2067;g2120;g2251;g2270;g2368;g2376;g2473;g2623;g2625;g2670;g2674;g2680;g2723;g…
119	GO:0009381	excinuclease ABC activity	12 (1.31%)	57 (0.69%)	0.020085	0.293675	g294;g728;g3125;g3419;g3486;g5467;g6621;g8568;g9230;g3420;g3887;g6917
120	GO:0051219	phosphoprotein binding	8 (0.87%)	32 (0.39%)	0.020369	0.295353	g496;g2670;g3281;g3384;g6919;g10112;g5026;g1955
121	GO:0034596	phosphatidylinositol phosphate 4-phosphatase activity	3 (0.33%)	6 (0.07%)	0.020858	0.299946	g765;g4952;g9820
122	GO:0034212	peptide N-acetyltransferase activity	11 (1.2%)	51 (0.61%)	0.021463	0.306113	g2929;g3875;g3882;g6295;g6759;g7687;g8508;g8735;g10009;g1170;g8038
123	GO:0016504	peptidase activator activity	6 (0.65%)	21 (0.25%)	0.022729	0.321538	g3455;g4523;g4842;g6203;g8607;g1902
124	GO:0016791	phosphatase activity	32 (3.49%)	203 (2.45%)	0.024116	0.338398	g563;g765;g2376;g2623;g3074;g3281;g3447;g3455;g3800;g4952;g5025;g5651;g5730;g6102;g6295;g6489;g6894;g7629;g8365;g9173;g9820;g10104;g10382;g10601;g1265;g1555;g3462;g3476;g3944;g6806;g6816;g7727
125	GO:0008138	protein tyrosine/serine/threonine phosphatase activity	5 (0.54%)	16 (0.19%)	0.02526	0.351624	g3281;g5651;g5730;g6489;g6816
126	GO:0004518	nuclease activity	46 (5.01%)	313 (3.77%)	0.026064	0.359934	g41;g294;g728;g753;g1713;g1761;g2858;g3117;g3125;g3343;g3411;g3419;g3486;g3945;g4427;g4893;g5137;g5467;g5763;g5818;g6074;g6621;g6842;g7866;g7916;g8233;g8568;g8732;g8822;g9221;g9230;g9612;g10379;g3420;g3887;g4732;g6028;g1054;g4994;g5392;g5609;g5674;g6917;g7940;g8767;g10537
127	GO:0033218	amide binding	22 (2.4%)	130 (1.57%)	0.027347	0.369369	g103;g1107;g2625;g3411;g3853;g5139;g5554;g5752;g6621;g6752;g7513;g7528;g7951;g8801;g9198;g10112;g10261;g2635;g3112;g199;g2539;g4807
128	GO:0005319	lipid transporter activity	16 (1.74%)	87 (1.05%)	0.027639	0.369369	g1107;g2623;g3419;g3486;g3511;g5467;g6093;g6470;g6621;g6924;g7576;g8568;g9230;g3420;g5168;g6445
129	GO:0017056	structural constituent of nuclear pore	6 (0.65%)	22 (0.27%)	0.028413	0.369369	g3427;g3453;g5752;g588;g1985;g8064
130	GO:0008565	protein transporter activity	27 (2.94%)	168 (2.02%)	0.029057	0.369369	g749;g932;g1015;g1794;g1971;g3144;g3419;g3486;g3853;g5139;g5467;g5554;g5752;g6470;g6621;g6752;g8390;g8568;g8822;g9021;g9230;g10012;g3420;g3621;g4807;g5609;g10302
131	GO:0017112	Rab guanyl-nucleotide exchange factor activity	7 (0.76%)	28 (0.34%)	0.029281	0.369369	g2249;g2967;g3429;g5375;g5862;g6982;g8229
132	GO:0002020	protease binding	10 (1.09%)	47 (0.57%)	0.030178	0.369369	g103;g496;g806;g1588;g2929;g4545;g5651;g5752;g7028;g8607
133	GO:0004520	endodeoxyribonuclease activity	17 (1.85%)	95 (1.14%)	0.03018	0.369369	g294;g728;g3125;g3419;g3486;g4893;g5467;g6621;g8568;g9221;g9230;g3420;g3887;g6028;g1054;g6917;g8767
134	GO:0016779	nucleotidyltransferase activity	38 (4.14%)	254 (3.06%)	0.031771	0.369369	g873;g1464;g1500;g1713;g1938;g2004;g2625;g3220;g3281;g3310;g3410;g3564;g3886;g4340;g4993;g5393;g5554;g5650;g6621;g6759;g7866;g8607;g8873;g9221;g10226;g10343;g10378;g3342;g8643;g4412;g4478;g5295;g6031;g6042;g6204;g6751;g7915;g10303
135	GO:0042054	histone methyltransferase activity	9 (0.98%)	41 (0.49%)	0.0322	0.369369	g3376;g3987;g4859;g6919;g7270;g7283;g9206;g9675;g2319
136	GO:0008234	cysteine-type peptidase activity	18 (1.96%)	103 (1.24%)	0.032503	0.369369	g932;g1217;g3831;g4374;g4415;g5356;g6203;g8766;g9174;g10599;g2082;g760;g1902;g2081;g4695;g5794;g7728;g9022
137	GO:0019955	cytokine binding	5 (0.54%)	17 (0.2%)	0.032615	0.369369	g1935;g8801;g4739;g8738;g9022
138	GO:0032794	GTPase activating protein binding	5 (0.54%)	17 (0.2%)	0.032615	0.369369	g1794;g3445;g3909;g8229;g1955
139	GO:0061608	nuclear import signal receptor activity	5 (0.54%)	17 (0.2%)	0.032615	0.369369	g1015;g3853;g5139;g5554;g4807
140	GO:0042802	identical protein binding	95 (10.35%)	719 (8.66%)	0.033375	0.369369	g103;g496;g509;g749;g784;g1278;g1588;g1881;g1911;g2004;g2136;g2247;g2295;g2693;g2929;g3117;g3135;g3318;g3335;g3375;g3377;g3384;g3407;g3445;g3447;g3529;g4205;g4665;g4805;g4893;g5027;g5113;g5275;g5393;g5429;g5651;g5763;g6032;g6345;g6572;g6800;g6840;g6870;g6982;g6990;g7028;g7528;g7809;g7877;g7949;g7951;g7952;g8496;g8548;g8605;g8607;g8640;g8735;g8764;g8801;g8942;g9113;g9765;g9820;g10070;g10128;g10255…
141	GO:0001530	lipopolysaccharide binding	3 (0.33%)	7 (0.08%)	0.033538	0.369369	g5763;g1219;g4739
142	GO:0017134	fibroblast growth factor binding	3 (0.33%)	7 (0.08%)	0.033538	0.369369	g2724;g10391;g1309
143	GO:0031434	mitogen-activated protein kinase kinase binding	3 (0.33%)	7 (0.08%)	0.033538	0.369369	g9994;g1955;g9995
144	GO:0035800	deubiquitinase activator activity	3 (0.33%)	7 (0.08%)	0.033538	0.369369	g3455;g4842;g8607
145	GO:0042288	MHC class I protein binding	3 (0.33%)	7 (0.08%)	0.033538	0.369369	g8381;g8607;g760
146	GO:0098772	molecular function regulator	91 (9.91%)	686 (8.27%)	0.03375	0.369369	g496;g527;g624;g710;g771;g929;g1554;g1881;g1935;g1965;g1991;g2013;g2028;g2067;g2206;g2249;g2295;g2388;g2670;g2733;g2882;g2967;g3090;g3312;g3343;g3407;g3429;g3445;g3455;g3537;g3945;g4523;g4552;g4680;g4805;g4842;g5356;g5375;g5429;g5466;g5862;g6015;g6018;g6170;g6203;g6327;g6379;g6755;g6800;g6815;g6982;g7315;g7391;g7781;g7949;g8229;g8607;g9173;g9805;g10100;g10270;g10638;g10650;g526;g1056;g1310;g3342;…
147	GO:0004064	arylesterase activity	2 (0.22%)	3 (0.04%)	0.033965	0.369369	g6470;g10195
148	GO:0004108	citrate (Si)-synthase activity	2 (0.22%)	3 (0.04%)	0.033965	0.369369	g8959;g3452
149	GO:0004439	phosphatidylinositol-4,5-bisphosphate 5-phosphatase activity	2 (0.22%)	3 (0.04%)	0.033965	0.369369	g765;g10601
150	GO:0005133	interferon-gamma receptor binding	2 (0.22%)	3 (0.04%)	0.033965	0.369369	g2028;g10391
151	GO:0005161	platelet-derived growth factor receptor binding	2 (0.22%)	3 (0.04%)	0.033965	0.369369	g2670;g5651
152	GO:0008349	MAP kinase kinase kinase kinase activity	2 (0.22%)	3 (0.04%)	0.033965	0.369369	g3701;g7686
153	GO:0008940	nitrate reductase activity	2 (0.22%)	3 (0.04%)	0.033965	0.369369	g2004;g5608
154	GO:0008997	ribonuclease R activity	2 (0.22%)	3 (0.04%)	0.033965	0.369369	g3343;g9221
155	GO:0030228	lipoprotein particle receptor activity	2 (0.22%)	3 (0.04%)	0.033965	0.369369	g6470;g8381
156	GO:0035612	AP-2 adaptor complex binding	2 (0.22%)	3 (0.04%)	0.033965	0.369369	g771;g4989
157	GO:0036440	citrate synthase activity	2 (0.22%)	3 (0.04%)	0.033965	0.369369	g8959;g3452
158	GO:0046624	sphingolipid transporter activity	2 (0.22%)	3 (0.04%)	0.033965	0.369369	g1107;g6093
159	GO:0046974	histone methyltransferase activity (H3-K9 specific)	2 (0.22%)	3 (0.04%)	0.033965	0.369369	g7283;g9206
160	GO:0052659	inositol-1,3,4,5-tetrakisphosphate 5-phosphatase activity	2 (0.22%)	3 (0.04%)	0.033965	0.369369	g765;g10104
161	GO:0004654	polyribonucleotide nucleotidyltransferase activity	6 (0.65%)	23 (0.28%)	0.034957	0.374028	g3220;g4993;g9221;g10226;g4478;g6042
162	GO:0030276	clathrin binding	7 (0.76%)	29 (0.35%)	0.035038	0.374028	g103;g1794;g3339;g9021;g1255;g7227;g1256
163	GO:0051117	ATPase binding	7 (0.76%)	29 (0.35%)	0.035038	0.374028	g1335;g4545;g6759;g7391;g7490;g5026;g2319
164	GO:0030695	GTPase regulator activity	21 (2.29%)	126 (1.52%)	0.035491	0.374117	g929;g1554;g1965;g1991;g2013;g2028;g2670;g2882;g3090;g3312;g3445;g4805;g5466;g6015;g6982;g7781;g8229;g9173;g591;g4807;g9807
165	GO:0043024	ribosomal small subunit binding	4 (0.44%)	12 (0.14%)	0.035594	0.374117	g3411;g8868;g4412;g5196
166	GO:0097159	organic cyclic compound binding	419 (45.64%)	3553 (42.81%)	0.035692	0.374117	g41;g63;g73;g95;g103;g198;g294;g316;g497;g514;g522;g527;g580;g655;g657;g719;g728;g749;g753;g765;g784;g789;g832;g873;g929;g945;g955;g1008;g1015;g1192;g1221;g1278;g1292;g1362;g1365;g1380;g1462;g1464;g1499;g1500;g1524;g1600;g1713;g1717;g1742;g1752;g1758;g1761;g1819;g1877;g1881;g1890;g1893;g1938;g2004;g2025;g2028;g2067;g2111;g2247;g2368;g2376;g2392;g2473;g2534;g2623;g2625;g2679;g2680;g2714;g2742;g278…
167	GO:1901363	heterocyclic compound binding	417 (45.42%)	3537 (42.61%)	0.036908	0.384552	g41;g63;g73;g95;g103;g198;g294;g316;g497;g514;g522;g527;g580;g655;g657;g719;g728;g749;g753;g765;g784;g789;g832;g873;g929;g945;g955;g1008;g1015;g1192;g1221;g1278;g1292;g1362;g1365;g1380;g1462;g1464;g1499;g1500;g1524;g1600;g1713;g1717;g1742;g1752;g1758;g1761;g1819;g1877;g1881;g1890;g1893;g1938;g2004;g2025;g2028;g2067;g2111;g2247;g2368;g2376;g2392;g2473;g2534;g2623;g2625;g2679;g2680;g2714;g2742;g278…
168	GO:0005096	GTPase activator activity	19 (2.07%)	112 (1.35%)	0.037546	0.388874	g929;g1554;g1965;g1991;g2013;g2670;g2882;g3090;g3312;g3445;g4805;g5466;g6015;g6982;g7781;g8229;g9173;g591;g9807
169	GO:0008094	DNA-dependent ATPase activity	21 (2.29%)	127 (1.53%)	0.038275	0.391924	g73;g294;g728;g2858;g3125;g4427;g5137;g5275;g5953;g6018;g6284;g6509;g6759;g8384;g8657;g9011;g9254;g9793;g3202;g3887;g6917
170	GO:0003678	DNA helicase activity	25 (2.72%)	157 (1.89%)	0.038291	0.391924	g73;g294;g657;g728;g749;g1500;g2858;g3074;g3125;g3310;g3411;g4427;g5137;g5650;g6018;g6509;g6621;g6759;g8384;g8607;g8657;g9011;g3887;g4732;g6917
171	GO:0032266	phosphatidylinositol-3-phosphate binding	8 (0.87%)	36 (0.43%)	0.03955	0.402436	g615;g1380;g3344;g4576;g7629;g8496;g8973;g10246
172	GO:0003743	translation initiation factor activity	16 (1.74%)	91 (1.1%)	0.040135	0.406015	g655;g1717;g1893;g2247;g3208;g4340;g6007;g6771;g8764;g10378;g3342;g2269;g4412;g5196;g6917;g9022
173	GO:0016706	oxidoreductase activity, acting on paired donors, with incorporation or reduction of molecular oxygen, 2-oxoglutarate as one donor, and incorporation of one atom each of oxygen into both donors	5 (0.54%)	18 (0.22%)	0.041172	0.411718	g579;g580;g2473;g760;g9272
174	GO:0048365	Rac GTPase binding	5 (0.54%)	18 (0.22%)	0.041172	0.411718	g1965;g4805;g6982;g7635;g7015
175	GO:0046961	proton-transporting ATPase activity, rotational mechanism	7 (0.76%)	30 (0.36%)	0.041498	0.412606	g3486;g5467;g8381;g9760;g10173;g1718;g4368
176	GO:0070628	proteasome binding	6 (0.65%)	24 (0.29%)	0.042398	0.41916	g1588;g4523;g6203;g7028;g8607;g9853
177	GO:0005085	guanyl-nucleotide exchange factor activity	22 (2.4%)	136 (1.64%)	0.04278	0.42055	g527;g624;g710;g771;g2249;g2733;g2967;g3343;g3429;g4805;g5375;g5862;g6015;g6982;g7315;g8229;g10650;g526;g3342;g1283;g2128;g6415
178	GO:0030159	receptor signaling complex scaffold activity	4 (0.44%)	13 (0.16%)	0.047035	0.451759	g1600;g3090;g8548;g9548
179	GO:0042578	phosphoric ester hydrolase activity	36 (3.92%)	246 (2.96%)	0.047504	0.451759	g563;g765;g2376;g2623;g3074;g3281;g3447;g3455;g3800;g4952;g5025;g5118;g5651;g5730;g5866;g6102;g6295;g6489;g6775;g6894;g7629;g8365;g9173;g9820;g10104;g10382;g10601;g760;g1265;g1555;g3462;g3476;g3944;g6806;g6816;g7727
180	GO:0004725	protein tyrosine phosphatase activity	9 (0.98%)	44 (0.53%)	0.048413	0.451759	g563;g3281;g3455;g3800;g5651;g5730;g6489;g10382;g6816
181	GO:0036442	hydrogen-exporting ATPase activity	7 (0.76%)	31 (0.37%)	0.048683	0.451759	g3486;g5467;g8381;g9760;g10173;g1718;g4368
182	GO:0030234	enzyme regulator activity	67 (7.3%)	498 (6%)	0.048937	0.451759	g496;g929;g1554;g1881;g1935;g1965;g1991;g2013;g2028;g2067;g2206;g2670;g2882;g3090;g3312;g3407;g3445;g3455;g3537;g3945;g4523;g4680;g4805;g4842;g5356;g5429;g5466;g6015;g6018;g6170;g6203;g6379;g6755;g6800;g6815;g6982;g7391;g7781;g7949;g8229;g8607;g9173;g10100;g10270;g10638;g1056;g4732;g6812;g591;g1849;g1902;g4695;g4739;g4775;g4807;g4862;g5555;g5616;g5794;g6378;g6668;g6754;g6888;g7915;g7939;g9203;g98…
183	GO:0004652	polynucleotide adenylyltransferase activity	3 (0.33%)	8 (0.1%)	0.04933	0.451759	g873;g1464;g3410
184	GO:0009013	succinate-semialdehyde dehydrogenase [NAD(P)+] activity	3 (0.33%)	8 (0.1%)	0.04933	0.451759	g3135;g1972;g3628
185	GO:0016273	arginine N-methyltransferase activity	3 (0.33%)	8 (0.1%)	0.04933	0.451759	g3987;g4517;g4859
186	GO:0016274	protein-arginine N-methyltransferase activity	3 (0.33%)	8 (0.1%)	0.04933	0.451759	g3987;g4517;g4859
187	GO:0016661	oxidoreductase activity, acting on other nitrogenous compounds as donors	3 (0.33%)	8 (0.1%)	0.04933	0.451759	g2004;g5608;g214
188	GO:0042287	MHC protein binding	3 (0.33%)	8 (0.1%)	0.04933	0.451759	g8381;g8607;g760
189	GO:0043023	ribosomal large subunit binding	3 (0.33%)	8 (0.1%)	0.04933	0.451759	g1464;g1752;g3203
190	GO:0097617	annealing activity	3 (0.33%)	8 (0.1%)	0.04933	0.451759	g9793;g3887;g5196
191	GO:0016879	ligase activity, forming carbon-nitrogen bonds	14 (1.53%)	79 (0.95%)	0.049678	0.452566	g95;g3318;g5393;g5989;g6345;g6621;g9167;g10455;g3112;g4481;g4849;g5088;g6031;g7915
ACQ-VS-NCQ significant and enrichment GO (Biological Process)
#	GO ID	Description	GeneRatio (900)	BgRatio (8178)	pvalue	p.adjust	geneID
1	GO:0006996	organelle organization	411 (45.67%)	2745 (33.57%)	9.14294e-16	7.26224e-12	g63;g69;g73;g103;g198;g201;g294;g308;g316;g384;g496;g509;g522;g527;g579;g580;g615;g618;g657;g719;g728;g749;g753;g765;g789;g806;g829;g1008;g1015;g1107;g1192;g1221;g1278;g1292;g1462;g1464;g1493;g1495;g1499;g1500;g1554;g1588;g1600;g1631;g1637;g1713;g1716;g1742;g1758;g1761;g1881;g1889;g1890;g1911;g1938;g1948;g2004;g2013;g2028;g2206;g2249;g2295;g2364;g2368;g2376;g2388;g2392;g2473;g2534;g2623;g2647;g26…
2	GO:0044267	cellular protein metabolic process	397 (44.11%)	2720 (33.26%)	4.27687e-13	1.43832e-09	g63;g69;g99;g175;g198;g201;g294;g496;g502;g514;g522;g527;g563;g579;g580;g618;g655;g657;g719;g789;g807;g829;g981;g1008;g1107;g1192;g1193;g1217;g1278;g1292;g1335;g1362;g1365;g1380;g1398;g1480;g1500;g1588;g1600;g1637;g1713;g1716;g1717;g1742;g1877;g1881;g1890;g1893;g1935;g1964;g2004;g2013;g2028;g2067;g2249;g2251;g2270;g2368;g2376;g2473;g2670;g2674;g2680;g2697;g2742;g2781;g2864;g2865;g2882;g2929;g2967…
3	GO:0016043	cellular component organization	533 (59.22%)	3925 (47.99%)	5.43241e-13	1.43832e-09	g63;g69;g73;g103;g198;g201;g294;g308;g316;g384;g496;g509;g522;g527;g563;g579;g580;g615;g618;g655;g657;g710;g719;g728;g749;g753;g765;g789;g806;g829;g929;g932;g945;g955;g1008;g1015;g1107;g1192;g1221;g1278;g1292;g1335;g1398;g1462;g1464;g1493;g1495;g1499;g1500;g1524;g1554;g1588;g1600;g1631;g1637;g1713;g1716;g1717;g1742;g1752;g1758;g1761;g1794;g1845;g1877;g1881;g1889;g1890;g1911;g1938;g1948;g1965;g200…
4	GO:0071840	cellular component organization or biogenesis	554 (61.56%)	4146 (50.7%)	2.57471e-12	5.11274e-09	g63;g69;g73;g103;g198;g201;g294;g308;g316;g384;g496;g509;g522;g527;g563;g579;g580;g615;g618;g655;g657;g710;g719;g728;g749;g753;g765;g789;g806;g807;g829;g929;g932;g945;g955;g1008;g1015;g1107;g1192;g1221;g1278;g1292;g1335;g1398;g1462;g1464;g1493;g1495;g1499;g1500;g1524;g1554;g1588;g1600;g1631;g1637;g1713;g1716;g1717;g1742;g1752;g1758;g1761;g1794;g1819;g1845;g1877;g1881;g1889;g1890;g1893;g1911;g1938…
5	GO:0051641	cellular localization	313 (34.78%)	2057 (25.15%)	5.06534e-12	8.0468e-09	g63;g69;g103;g201;g496;g509;g618;g657;g749;g765;g789;g806;g829;g932;g955;g981;g1008;g1015;g1107;g1192;g1335;g1493;g1500;g1554;g1588;g1600;g1716;g1742;g1752;g1758;g1761;g1794;g1845;g1877;g1878;g1935;g1938;g1971;g2004;g2013;g2028;g2067;g2111;g2136;g2206;g2249;g2295;g2364;g2368;g2388;g2623;g2693;g2714;g2763;g2882;g2929;g2967;g2980;g3094;g3144;g3216;g3260;g3310;g3312;g3335;g3339;g3343;g3356;g3375;g33…
6	GO:0051128	regulation of cellular component organization	230 (25.56%)	1419 (17.35%)	2.95769e-11	3.5052e-08	g63;g73;g103;g201;g294;g384;g496;g527;g618;g710;g719;g749;g765;g789;g929;g1192;g1221;g1278;g1398;g1462;g1464;g1493;g1499;g1500;g1631;g1637;g1717;g1758;g1761;g1794;g1845;g1965;g2013;g2206;g2249;g2295;g2368;g2376;g2661;g2670;g2693;g2882;g2929;g2980;g3094;g3117;g3208;g3260;g3310;g3312;g3335;g3339;g3356;g3375;g3384;g3410;g3411;g3422;g3453;g3455;g3456;g3478;g3529;g3537;g3627;g3725;g3831;g3853;g3875;g3…
7	GO:0050789	regulation of biological process	622 (69.11%)	4833 (59.1%)	3.21704e-11	3.5052e-08	g63;g73;g83;g103;g198;g201;g294;g384;g496;g509;g527;g563;g579;g580;g587;g618;g624;g657;g710;g719;g728;g749;g753;g765;g771;g789;g806;g873;g929;g932;g945;g955;g1008;g1015;g1107;g1192;g1193;g1217;g1221;g1278;g1292;g1335;g1362;g1365;g1380;g1398;g1462;g1464;g1480;g1493;g1495;g1499;g1500;g1554;g1588;g1600;g1631;g1637;g1691;g1716;g1717;g1752;g1758;g1761;g1794;g1819;g1845;g1877;g1878;g1881;g1889;g1890;g1…
8	GO:0050794	regulation of cellular process	592 (65.78%)	4550 (55.64%)	3.53035e-11	3.5052e-08	g63;g73;g83;g103;g198;g201;g294;g384;g496;g527;g563;g579;g580;g587;g618;g624;g710;g719;g728;g749;g753;g765;g771;g789;g806;g929;g945;g955;g1008;g1015;g1107;g1192;g1217;g1221;g1278;g1292;g1335;g1362;g1365;g1380;g1398;g1462;g1464;g1480;g1493;g1495;g1499;g1500;g1588;g1600;g1631;g1637;g1691;g1716;g1717;g1752;g1758;g1761;g1794;g1819;g1845;g1878;g1881;g1890;g1903;g1911;g1935;g1948;g1964;g1965;g1991;g201…
9	GO:0051276	chromosome organization	200 (22.22%)	1197 (14.64%)	5.96895e-11	4.74666e-08	g73;g198;g294;g316;g496;g522;g579;g580;g618;g728;g749;g789;g1192;g1278;g1462;g1464;g1499;g1500;g1588;g1600;g1713;g1761;g1890;g1911;g1948;g2249;g2368;g2376;g2392;g2473;g2534;g2647;g2661;g2679;g2781;g2858;g2929;g2976;g3094;g3125;g3335;g3375;g3396;g3411;g3422;g3427;g3445;g3453;g3831;g3853;g3875;g3882;g3987;g4174;g4215;g4226;g4316;g4417;g4433;g4517;g4523;g4531;g4557;g4565;g4738;g4842;g4859;g5132;g513…
10	GO:0033036	macromolecule localization	293 (32.56%)	1932 (23.62%)	5.97591e-11	4.74666e-08	g63;g69;g103;g201;g294;g496;g657;g749;g765;g789;g806;g829;g932;g981;g1008;g1015;g1107;g1192;g1221;g1335;g1493;g1500;g1554;g1588;g1716;g1752;g1761;g1794;g1845;g1877;g1878;g1881;g1938;g1971;g2004;g2013;g2028;g2067;g2111;g2136;g2206;g2249;g2295;g2388;g2623;g2693;g2711;g2763;g2882;g2929;g2967;g2976;g2980;g3094;g3144;g3216;g3260;g3310;g3312;g3335;g3339;g3343;g3356;g3377;g3384;g3411;g3419;g3422;g3427;g…
11	GO:1902589	single-organism organelle organization	310 (34.44%)	2081 (25.45%)	1.08198e-10	7.8129e-08	g63;g69;g103;g198;g201;g294;g308;g316;g384;g496;g522;g527;g579;g580;g615;g618;g657;g728;g749;g753;g789;g1008;g1107;g1192;g1221;g1292;g1464;g1493;g1495;g1554;g1588;g1600;g1631;g1637;g1713;g1716;g1742;g1758;g1761;g1889;g2004;g2013;g2206;g2249;g2364;g2368;g2376;g2388;g2392;g2473;g2534;g2670;g2679;g2781;g2864;g2882;g2929;g2976;g3094;g3125;g3260;g3310;g3312;g3335;g3339;g3375;g3384;g3410;g3411;g3422;g3…
12	GO:0065007	biological regulation	649 (72.11%)	5133 (62.77%)	2.45802e-10	1.62701e-07	g63;g73;g83;g103;g198;g201;g294;g384;g496;g509;g527;g563;g579;g580;g587;g618;g624;g657;g699;g710;g719;g728;g749;g753;g765;g771;g789;g806;g873;g929;g932;g945;g955;g1008;g1015;g1107;g1192;g1193;g1217;g1221;g1278;g1292;g1335;g1362;g1365;g1380;g1398;g1462;g1464;g1480;g1493;g1495;g1499;g1500;g1554;g1588;g1600;g1631;g1637;g1691;g1713;g1716;g1717;g1752;g1758;g1761;g1794;g1819;g1845;g1877;g1878;g1881;g18…
13	GO:0019222	regulation of metabolic process	447 (49.67%)	3269 (39.97%)	2.7503e-10	1.68043e-07	g63;g73;g103;g198;g294;g496;g579;g580;g618;g657;g710;g719;g728;g753;g765;g789;g806;g873;g929;g945;g955;g1008;g1107;g1192;g1193;g1217;g1221;g1278;g1292;g1335;g1365;g1380;g1398;g1462;g1464;g1499;g1500;g1554;g1588;g1600;g1637;g1691;g1717;g1752;g1761;g1877;g1881;g1889;g1890;g1911;g1935;g1938;g1948;g1965;g1991;g2013;g2028;g2067;g2206;g2249;g2270;g2295;g2318;g2368;g2376;g2473;g2661;g2670;g2679;g2763;g2…
14	GO:0044702	single organism reproductive process	215 (23.89%)	1334 (16.31%)	2.9772e-10	1.68914e-07	g103;g201;g294;g710;g728;g749;g784;g789;g806;g807;g1192;g1221;g1278;g1398;g1462;g1464;g1493;g1588;g1631;g1691;g1716;g1742;g1758;g1794;g1889;g1938;g2295;g2376;g2388;g2534;g2670;g2781;g2882;g2929;g3090;g3094;g3117;g3260;g3335;g3384;g3410;g3411;g3422;g3444;g3455;g3478;g3511;g3529;g3537;g3696;g3875;g3886;g3898;g3938;g3945;g3952;g3987;g4067;g4174;g4205;g4226;g4374;g4517;g4523;g4576;g4665;g4680;g4738;g…
15	GO:0006464	cellular protein modification process	287 (31.89%)	1913 (23.39%)	3.8393e-10	1.90597e-07	g63;g69;g99;g175;g198;g201;g496;g502;g514;g522;g527;g563;g579;g580;g618;g789;g807;g829;g1008;g1192;g1217;g1278;g1335;g1362;g1380;g1398;g1480;g1588;g1600;g1637;g1881;g1890;g1935;g1964;g2004;g2013;g2028;g2067;g2249;g2251;g2368;g2376;g2473;g2670;g2674;g2680;g2697;g2781;g2865;g2882;g2929;g2980;g3090;g3117;g3281;g3377;g3384;g3407;g3411;g3422;g3455;g3456;g3482;g3537;g3701;g3800;g3831;g3875;g3882;g3938;…
16	GO:0036211	protein modification process	287 (31.89%)	1913 (23.39%)	3.8393e-10	1.90597e-07	g63;g69;g99;g175;g198;g201;g496;g502;g514;g522;g527;g563;g579;g580;g618;g789;g807;g829;g1008;g1192;g1217;g1278;g1335;g1362;g1380;g1398;g1480;g1588;g1600;g1637;g1881;g1890;g1935;g1964;g2004;g2013;g2028;g2067;g2249;g2251;g2368;g2376;g2473;g2670;g2674;g2680;g2697;g2781;g2865;g2882;g2929;g2980;g3090;g3117;g3281;g3377;g3384;g3407;g3411;g3422;g3455;g3456;g3482;g3537;g3701;g3800;g3831;g3875;g3882;g3938;…
17	GO:0046907	intracellular transport	212 (23.56%)	1326 (16.21%)	8.82942e-10	4.12542e-07	g63;g69;g103;g496;g509;g657;g749;g765;g829;g955;g1008;g1015;g1107;g1192;g1335;g1554;g1600;g1716;g1752;g1758;g1761;g1794;g1845;g1877;g1878;g1938;g1971;g2004;g2013;g2067;g2111;g2136;g2206;g2249;g2295;g2364;g2368;g2388;g2623;g2763;g2882;g2967;g3094;g3144;g3216;g3260;g3312;g3335;g3339;g3343;g3356;g3375;g3377;g3384;g3411;g3422;g3427;g3429;g3444;g3453;g3455;g3478;g3482;g3725;g3853;g4067;g4205;g4301;g43…
18	GO:0048522	positive regulation of cellular process	321 (35.67%)	2219 (27.13%)	1.6051e-09	1e-06	g73;g103;g198;g201;g384;g496;g527;g580;g624;g710;g749;g765;g789;g945;g955;g1008;g1192;g1217;g1221;g1278;g1335;g1365;g1398;g1462;g1493;g1495;g1499;g1500;g1588;g1600;g1631;g1637;g1691;g1717;g1794;g1881;g1948;g1965;g1991;g2013;g2028;g2067;g2206;g2249;g2270;g2295;g2368;g2376;g2670;g2693;g2707;g2742;g2763;g2882;g2929;g2967;g2980;g3090;g3117;g3183;g3208;g3260;g3281;g3318;g3339;g3356;g3384;g3396;g3407;g…
19	GO:0003006	developmental process involved in reproduction	172 (19.11%)	1028 (12.57%)	1.78155e-09	1e-06	g103;g201;g294;g496;g710;g728;g749;g789;g806;g807;g1192;g1278;g1398;g1462;g1493;g1631;g1691;g1742;g1794;g1889;g2295;g2376;g2670;g2781;g2882;g2929;g3090;g3094;g3117;g3260;g3356;g3384;g3410;g3411;g3422;g3444;g3455;g3478;g3511;g3529;g3696;g3875;g3898;g3945;g3952;g4067;g4174;g4205;g4517;g4523;g4680;g4738;g4777;g5027;g5113;g5132;g5137;g5356;g5429;g5467;g5485;g5651;g5763;g5953;g6074;g6093;g6303;g6379;g…
20	GO:0006325	chromatin organization	109 (12.11%)	570 (6.97%)	1.99075e-09	1e-06	g198;g579;g580;g789;g1278;g1462;g1499;g1500;g1588;g1890;g1911;g1948;g2249;g2376;g2473;g2534;g2647;g2661;g2781;g2929;g3094;g3375;g3396;g3411;g3422;g3427;g3831;g3853;g3875;g3882;g3987;g4226;g4417;g4433;g4517;g4523;g4531;g4557;g4565;g4842;g4859;g5575;g5953;g6018;g6128;g6284;g6285;g6295;g6340;g6422;g6755;g6759;g6780;g6815;g6840;g6919;g7283;g7319;g7687;g7748;g7866;g8065;g8362;g8503;g8508;g8525;g8657;g…
21	GO:0048519	negative regulation of biological process	331 (36.78%)	2309 (28.23%)	2.23817e-09	1e-06	g63;g73;g103;g198;g201;g294;g496;g563;g579;g580;g618;g657;g719;g728;g753;g789;g873;g1015;g1192;g1217;g1221;g1278;g1380;g1398;g1462;g1464;g1499;g1500;g1588;g1637;g1691;g1717;g1761;g1877;g1878;g1889;g1890;g1935;g1948;g1965;g1991;g2013;g2028;g2067;g2206;g2295;g2376;g2661;g2670;g2763;g2781;g2865;g2882;g2929;g2967;g2980;g3090;g3094;g3125;g3260;g3310;g3318;g3343;g3356;g3375;g3384;g3393;g3396;g3407;g341…
22	GO:0071705	nitrogen compound transport	197 (21.89%)	1225 (14.98%)	2.65122e-09	1e-06	g69;g103;g294;g496;g749;g765;g806;g829;g1008;g1015;g1107;g1335;g1495;g1554;g1716;g1752;g1761;g1794;g1845;g1877;g1878;g1881;g1971;g2004;g2013;g2111;g2206;g2295;g2388;g2623;g2693;g2742;g2763;g2882;g2967;g2980;g3094;g3144;g3216;g3260;g3312;g3335;g3339;g3343;g3356;g3377;g3411;g3419;g3422;g3427;g3444;g3445;g3453;g3455;g3478;g3482;g3486;g3725;g3853;g3886;g3902;g4067;g4178;g4205;g4301;g4366;g4374;g4473;…
23	GO:0044265	cellular macromolecule catabolic process	142 (15.78%)	810 (9.9%)	2.83077e-09	1e-06	g294;g496;g502;g618;g657;g719;g789;g873;g1193;g1217;g1335;g1398;g1464;g1500;g1588;g1713;g1761;g1877;g1964;g2251;g2376;g2473;g2697;g2781;g2967;g3090;g3117;g3220;g3343;g3356;g3384;g3410;g3411;g3422;g3455;g3831;g3882;g3886;g3938;g3945;g4067;g4226;g4374;g4415;g4433;g4517;g4523;g4545;g4552;g4680;g4733;g4993;g5113;g5132;g5203;g5268;g5275;g5650;g5651;g5752;g5763;g6074;g6098;g6170;g6203;g6295;g6470;g6572…
24	GO:0022414	reproductive process	239 (26.56%)	1558 (19.05%)	2.99716e-09	1e-06	g103;g201;g294;g496;g710;g728;g749;g784;g789;g806;g807;g1192;g1221;g1278;g1398;g1462;g1464;g1493;g1554;g1588;g1600;g1631;g1691;g1716;g1742;g1758;g1794;g1878;g1889;g1938;g2295;g2376;g2388;g2534;g2670;g2781;g2882;g2929;g3090;g3094;g3117;g3260;g3312;g3335;g3356;g3384;g3410;g3411;g3422;g3444;g3455;g3478;g3511;g3529;g3537;g3696;g3875;g3886;g3898;g3938;g3945;g3952;g3987;g4067;g4174;g4205;g4226;g4374;g4…
25	GO:0000003	reproduction	255 (28.33%)	1687 (20.63%)	3.04796e-09	1e-06	g103;g201;g294;g496;g657;g710;g728;g749;g784;g789;g806;g807;g932;g1192;g1221;g1278;g1398;g1462;g1464;g1493;g1500;g1554;g1588;g1600;g1631;g1691;g1716;g1742;g1758;g1794;g1878;g1889;g1938;g2295;g2376;g2388;g2534;g2625;g2670;g2781;g2882;g2929;g3090;g3094;g3117;g3260;g3310;g3312;g3335;g3356;g3384;g3410;g3411;g3422;g3444;g3455;g3478;g3511;g3526;g3529;g3537;g3696;g3875;g3886;g3898;g3938;g3945;g3952;g398…
26	GO:0060255	regulation of macromolecule metabolic process	401 (44.56%)	2914 (35.63%)	3.06646e-09	1e-06	g73;g103;g198;g294;g496;g579;g580;g618;g657;g719;g728;g753;g789;g806;g873;g945;g955;g1008;g1107;g1192;g1193;g1217;g1221;g1278;g1292;g1335;g1365;g1380;g1398;g1462;g1464;g1499;g1500;g1588;g1600;g1637;g1691;g1717;g1752;g1761;g1877;g1881;g1889;g1890;g1911;g1935;g1938;g1948;g1991;g2013;g2028;g2067;g2206;g2249;g2270;g2318;g2376;g2473;g2661;g2670;g2679;g2781;g2864;g2865;g2882;g2929;g2967;g3090;g3094;g31…
27	GO:0031323	regulation of cellular metabolic process	399 (44.33%)	2898 (35.44%)	3.28275e-09	1e-06	g63;g73;g103;g198;g294;g496;g579;g580;g618;g719;g728;g753;g765;g789;g945;g955;g1008;g1107;g1192;g1217;g1221;g1278;g1292;g1335;g1365;g1380;g1398;g1462;g1464;g1499;g1500;g1588;g1600;g1637;g1691;g1717;g1752;g1761;g1881;g1890;g1911;g1935;g1948;g1991;g2013;g2028;g2067;g2206;g2249;g2270;g2295;g2318;g2376;g2473;g2661;g2670;g2679;g2763;g2781;g2864;g2865;g2882;g2929;g2967;g2980;g3090;g3094;g3117;g3183;g32…
28	GO:0007276	gamete generation	156 (17.33%)	917 (11.21%)	3.71265e-09	1e-06	g103;g201;g294;g749;g784;g789;g1192;g1278;g1462;g1493;g1588;g1631;g1716;g1742;g1758;g1794;g1889;g2295;g2376;g2388;g2534;g2781;g2882;g2929;g3090;g3094;g3117;g3260;g3335;g3384;g3410;g3422;g3444;g3455;g3478;g3511;g3529;g3696;g3875;g3886;g3898;g3938;g3945;g3952;g3987;g4067;g4174;g4205;g4374;g4523;g4665;g4680;g4738;g5027;g5113;g5137;g5275;g5429;g5485;g5554;g5621;g5622;g5651;g5763;g5953;g6093;g6284;g63…
29	GO:0007049	cell cycle	215 (23.89%)	1371 (16.76%)	3.78682e-09	1e-06	g103;g201;g496;g522;g618;g719;g728;g749;g753;g789;g1008;g1192;g1221;g1278;g1462;g1464;g1493;g1588;g1713;g1716;g1717;g1742;g1758;g1794;g1881;g1889;g1890;g1964;g2067;g2247;g2249;g2376;g2388;g2534;g2670;g2781;g2882;g2929;g3094;g3260;g3335;g3343;g3375;g3384;g3407;g3410;g3411;g3419;g3422;g3453;g3455;g3456;g3478;g3486;g3537;g3620;g3696;g3701;g3800;g3831;g3882;g3945;g4174;g4374;g4576;g4680;g4738;g4805;g…
30	GO:0043412	macromolecule modification	311 (34.56%)	2155 (26.35%)	4.68266e-09	1e-06	g63;g69;g99;g175;g198;g201;g496;g502;g514;g522;g527;g563;g579;g580;g618;g749;g789;g807;g829;g1008;g1192;g1217;g1278;g1292;g1335;g1362;g1380;g1398;g1480;g1500;g1588;g1600;g1637;g1819;g1881;g1889;g1890;g1935;g1964;g2004;g2013;g2028;g2067;g2249;g2251;g2368;g2376;g2473;g2670;g2674;g2680;g2697;g2742;g2781;g2865;g2882;g2929;g2980;g3090;g3117;g3281;g3335;g3377;g3384;g3407;g3411;g3419;g3422;g3455;g3456;g…
31	GO:0044260	cellular macromolecule metabolic process	594 (66%)	4670 (57.1%)	4.84169e-09	1e-06	g63;g69;g73;g99;g103;g175;g198;g201;g294;g496;g497;g502;g509;g514;g522;g527;g563;g579;g580;g618;g655;g657;g710;g719;g728;g749;g753;g765;g789;g807;g829;g873;g945;g955;g981;g1008;g1107;g1192;g1193;g1217;g1221;g1278;g1292;g1335;g1362;g1365;g1380;g1398;g1462;g1464;g1480;g1499;g1500;g1524;g1588;g1600;g1637;g1691;g1713;g1716;g1717;g1742;g1752;g1758;g1761;g1819;g1877;g1881;g1889;g1890;g1893;g1911;g1935;…
32	GO:0070727	cellular macromolecule localization	199 (22.11%)	1250 (15.28%)	5.09633e-09	1e-06	g63;g69;g103;g496;g749;g789;g829;g1008;g1015;g1192;g1335;g1554;g1588;g1716;g1761;g1794;g1877;g1878;g1938;g1971;g2004;g2013;g2028;g2067;g2111;g2136;g2206;g2249;g2388;g2623;g2693;g2763;g2882;g2929;g2967;g2980;g3094;g3144;g3260;g3312;g3339;g3343;g3356;g3384;g3411;g3422;g3427;g3444;g3453;g3455;g3478;g3482;g3725;g3853;g4067;g4205;g4301;g4366;g4374;g4523;g4545;g4576;g4738;g4805;g5089;g5113;g5126;g5132;…
33	GO:0044237	cellular metabolic process	701 (77.89%)	5706 (69.77%)	5.18244e-09	1e-06	g41;g63;g69;g73;g83;g95;g99;g103;g175;g198;g201;g213;g294;g384;g496;g497;g502;g509;g514;g522;g527;g563;g579;g580;g615;g618;g624;g655;g657;g710;g719;g728;g749;g753;g765;g789;g807;g829;g873;g932;g945;g955;g981;g1008;g1088;g1107;g1192;g1193;g1217;g1221;g1278;g1292;g1335;g1362;g1365;g1380;g1398;g1462;g1464;g1480;g1499;g1500;g1524;g1588;g1600;g1637;g1691;g1713;g1716;g1717;g1742;g1752;g1758;g1761;g1819…
34	GO:0006403	RNA localization	68 (7.56%)	305 (3.73%)	5.65941e-09	1e-06	g103;g294;g749;g1015;g1752;g1761;g2111;g3094;g3335;g3343;g3356;g3411;g3427;g3444;g3453;g3482;g3853;g4067;g4738;g5113;g5139;g5752;g6074;g6340;g6670;g6720;g6755;g6839;g6924;g6990;g7391;g7781;g7877;g8362;g8390;g8607;g8638;g8732;g9218;g9231;g9793;g10012;g10226;g197;g588;g1288;g3451;g5026;g6838;g7227;g10465;g1169;g1287;g1291;g1718;g1985;g2319;g4807;g4829;g4841;g4862;g5674;g6204;g7940;g8064;g9203;g1053…
35	GO:0016192	vesicle-mediated transport	155 (17.22%)	915 (11.19%)	5.74176e-09	1e-06	g63;g69;g103;g201;g384;g509;g749;g757;g765;g771;g1008;g1217;g1398;g1554;g1600;g1631;g1716;g1794;g1845;g1878;g1935;g1938;g1965;g2067;g2136;g2206;g2249;g2364;g2368;g2388;g2670;g2693;g2763;g2882;g2967;g2980;g3094;g3312;g3339;g3344;g3377;g3384;g3429;g3445;g3455;g3478;g3725;g3875;g4205;g4340;g4374;g4641;g4777;g4989;g4995;g5089;g5375;g5387;g5485;g5554;g5650;g5651;g5730;g5971;g5984;g6093;g6203;g6340;g63…
36	GO:1902582	single-organism intracellular transport	189 (21%)	1176 (14.38%)	6.58131e-09	1e-06	g63;g69;g103;g496;g509;g657;g749;g765;g829;g1008;g1015;g1107;g1554;g1600;g1716;g1761;g1794;g1845;g1877;g1878;g1938;g1971;g2004;g2013;g2111;g2136;g2249;g2295;g2364;g2368;g2388;g2763;g2882;g2967;g3094;g3144;g3260;g3335;g3339;g3343;g3356;g3377;g3384;g3411;g3422;g3427;g3429;g3453;g3455;g3478;g3482;g3725;g3853;g4067;g4205;g4301;g4366;g4374;g4523;g4545;g4576;g4641;g4777;g4805;g5089;g5113;g5126;g5139;g5…
37	GO:0044248	cellular catabolic process	230 (25.56%)	1501 (18.35%)	7.62222e-09	2e-06	g63;g103;g294;g496;g502;g580;g615;g618;g657;g719;g765;g789;g873;g1008;g1088;g1193;g1217;g1221;g1335;g1398;g1464;g1500;g1588;g1713;g1717;g1761;g1877;g1881;g1964;g2025;g2120;g2249;g2251;g2295;g2376;g2473;g2697;g2763;g2781;g2967;g2980;g3090;g3117;g3135;g3220;g3312;g3343;g3356;g3384;g3410;g3411;g3422;g3455;g3627;g3831;g3882;g3886;g3938;g3945;g4067;g4138;g4145;g4226;g4374;g4415;g4433;g4517;g4523;g4545…
38	GO:0010605	negative regulation of macromolecule metabolic process	218 (24.22%)	1407 (17.2%)	8.38942e-09	2e-06	g73;g103;g198;g294;g496;g579;g580;g618;g657;g719;g728;g789;g873;g1217;g1221;g1278;g1380;g1462;g1464;g1499;g1500;g1588;g1637;g1691;g1761;g1877;g1889;g1890;g1935;g2013;g2028;g2067;g2376;g2661;g2670;g2781;g2865;g2882;g2929;g2967;g3094;g3125;g3310;g3343;g3356;g3375;g3384;g3393;g3407;g3410;g3411;g3421;g3422;g3427;g3478;g3486;g3696;g3800;g3831;g3882;g3945;g4067;g4138;g4340;g4374;g4415;g4433;g4517;g4531…
39	GO:0048518	positive regulation of biological process	353 (39.22%)	2521 (30.83%)	8.46805e-09	2e-06	g73;g103;g198;g201;g384;g496;g527;g580;g624;g657;g710;g749;g765;g789;g929;g945;g955;g1008;g1192;g1217;g1221;g1278;g1335;g1365;g1398;g1462;g1493;g1495;g1499;g1500;g1554;g1588;g1600;g1631;g1637;g1691;g1717;g1752;g1794;g1878;g1881;g1938;g1948;g1965;g1991;g2013;g2028;g2067;g2206;g2249;g2270;g2295;g2368;g2376;g2670;g2693;g2707;g2742;g2763;g2882;g2929;g2967;g2976;g2980;g3090;g3117;g3144;g3183;g3208;g32…
40	GO:0051649	establishment of localization in cell	259 (28.78%)	1739 (21.26%)	9.67363e-09	2e-06	g63;g69;g103;g496;g509;g618;g657;g749;g765;g806;g829;g932;g955;g981;g1008;g1015;g1107;g1192;g1335;g1500;g1554;g1600;g1716;g1752;g1758;g1761;g1794;g1845;g1877;g1878;g1935;g1938;g1971;g2004;g2013;g2067;g2111;g2136;g2206;g2249;g2295;g2364;g2368;g2388;g2623;g2693;g2763;g2882;g2929;g2967;g3094;g3144;g3216;g3260;g3310;g3312;g3335;g3339;g3343;g3356;g3375;g3377;g3384;g3411;g3419;g3422;g3427;g3429;g3444;g…
41	GO:0019538	protein metabolic process	425 (47.22%)	3148 (38.49%)	9.81587e-09	2e-06	g63;g69;g99;g175;g198;g201;g294;g496;g502;g514;g522;g527;g563;g579;g580;g618;g655;g657;g719;g789;g807;g829;g932;g981;g1008;g1088;g1107;g1192;g1193;g1217;g1278;g1292;g1335;g1362;g1365;g1380;g1398;g1480;g1500;g1588;g1600;g1637;g1713;g1716;g1717;g1742;g1877;g1881;g1890;g1893;g1935;g1964;g2004;g2013;g2028;g2067;g2120;g2249;g2251;g2270;g2368;g2376;g2473;g2670;g2674;g2680;g2697;g2714;g2742;g2781;g2864;…
42	GO:0009892	negative regulation of metabolic process	231 (25.67%)	1521 (18.6%)	1.58595e-08	3e-06	g73;g103;g198;g294;g496;g579;g580;g618;g657;g719;g728;g789;g873;g1217;g1221;g1278;g1380;g1462;g1464;g1499;g1500;g1588;g1637;g1691;g1717;g1761;g1877;g1889;g1890;g1935;g2013;g2028;g2067;g2206;g2376;g2661;g2670;g2781;g2865;g2882;g2929;g2967;g3094;g3125;g3310;g3318;g3343;g3356;g3375;g3384;g3393;g3407;g3410;g3411;g3421;g3422;g3427;g3478;g3486;g3696;g3800;g3831;g3882;g3945;g4067;g4138;g4340;g4374;g4415…
43	GO:0042886	amide transport	165 (18.33%)	1004 (12.28%)	1.59417e-08	3e-06	g69;g103;g496;g749;g806;g829;g1008;g1015;g1107;g1335;g1554;g1716;g1761;g1794;g1845;g1877;g1878;g1971;g2004;g2013;g2111;g2206;g2295;g2388;g2623;g2693;g2763;g2882;g2967;g2980;g3094;g3144;g3216;g3260;g3312;g3339;g3343;g3356;g3377;g3411;g3419;g3422;g3427;g3444;g3445;g3453;g3455;g3478;g3482;g3486;g3725;g3853;g3902;g4067;g4205;g4301;g4366;g4374;g4523;g4545;g4576;g4777;g4805;g5089;g5113;g5126;g5139;g520…
44	GO:0034613	cellular protein localization	190 (21.11%)	1197 (14.64%)	1.62657e-08	3e-06	g63;g69;g103;g496;g749;g789;g829;g1008;g1015;g1192;g1335;g1554;g1588;g1716;g1761;g1794;g1877;g1878;g1938;g1971;g2004;g2013;g2028;g2067;g2111;g2136;g2206;g2249;g2388;g2623;g2693;g2763;g2882;g2929;g2967;g2980;g3094;g3144;g3260;g3312;g3339;g3343;g3356;g3384;g3411;g3422;g3427;g3444;g3453;g3455;g3478;g3482;g3725;g3853;g4067;g4205;g4301;g4366;g4374;g4523;g4545;g4576;g4805;g5089;g5113;g5126;g5132;g5137;…
45	GO:0006950	response to stress	300 (33.33%)	2089 (25.54%)	1.85787e-08	3e-06	g63;g73;g83;g103;g201;g294;g496;g502;g655;g657;g728;g749;g765;g806;g807;g932;g955;g981;g1008;g1107;g1192;g1221;g1335;g1362;g1365;g1398;g1500;g1588;g1600;g1691;g1713;g1819;g1881;g1890;g1911;g1935;g1964;g2005;g2013;g2028;g2067;g2120;g2206;g2249;g2270;g2295;g2623;g2674;g2742;g2763;g2781;g2858;g2865;g2929;g2980;g3074;g3090;g3117;g3125;g3281;g3310;g3312;g3343;g3356;g3384;g3407;g3411;g3419;g3422;g3427;…
46	GO:0044767	single-organism developmental process	461 (51.22%)	3481 (42.57%)	1.86073e-08	3e-06	g63;g103;g201;g294;g384;g496;g527;g563;g618;g624;g655;g657;g710;g719;g728;g749;g765;g784;g789;g806;g807;g929;g932;g1008;g1015;g1107;g1192;g1193;g1217;g1221;g1278;g1335;g1362;g1398;g1462;g1464;g1480;g1493;g1495;g1500;g1554;g1588;g1631;g1637;g1691;g1717;g1742;g1758;g1794;g1845;g1878;g1881;g1889;g1935;g1938;g1948;g1965;g1971;g1991;g2004;g2013;g2025;g2028;g2206;g2295;g2364;g2368;g2376;g2388;g2473;g26…
47	GO:0008104	protein localization	253 (28.11%)	1702 (20.81%)	1.90987e-08	3e-06	g63;g69;g103;g496;g657;g749;g765;g789;g806;g829;g932;g981;g1008;g1015;g1192;g1335;g1493;g1500;g1554;g1588;g1716;g1761;g1794;g1845;g1877;g1878;g1938;g1971;g2004;g2013;g2028;g2067;g2111;g2136;g2206;g2249;g2295;g2388;g2623;g2693;g2763;g2882;g2929;g2967;g2976;g2980;g3094;g3144;g3216;g3260;g3310;g3312;g3339;g3343;g3356;g3377;g3384;g3411;g3419;g3422;g3427;g3444;g3445;g3453;g3455;g3478;g3482;g3486;g3725…
48	GO:0032268	regulation of cellular protein metabolic process	191 (21.22%)	1208 (14.77%)	2.01398e-08	3e-06	g294;g496;g618;g719;g789;g1107;g1192;g1278;g1292;g1335;g1380;g1398;g1588;g1600;g1637;g1717;g1881;g1890;g1935;g2013;g2028;g2067;g2670;g2864;g2865;g2882;g2967;g3090;g3117;g3208;g3356;g3384;g3407;g3411;g3422;g3428;g3455;g3482;g3537;g3701;g3800;g3831;g3882;g3938;g3945;g3952;g4067;g4340;g4374;g4433;g4523;g4545;g4680;g4805;g4842;g4859;g4933;g4995;g5113;g5137;g5356;g5651;g5747;g5752;g5763;g5953;g6018;g6…
49	GO:0040029	regulation of gene expression, epigenetic	65 (7.22%)	295 (3.61%)	2.03051e-08	3e-06	g198;g294;g789;g1278;g1462;g1499;g1500;g1938;g2376;g2661;g3094;g3125;g3356;g3375;g3411;g3427;g3831;g3945;g3987;g4517;g4531;g4565;g5575;g5763;g5953;g6018;g6074;g6284;g6285;g6670;g6780;g6842;g6924;g7283;g7319;g7866;g8065;g8384;g8503;g8657;g8727;g8873;g9206;g9612;g9675;g9793;g10264;g10447;g10599;g3202;g6066;g1955;g3140;g3207;g4863;g5160;g5674;g6035;g6067;g6375;g6378;g7475;g8574;g8941;g10537
50	GO:0022412	cellular process involved in reproduction in multicellular organism	138 (15.33%)	806 (9.86%)	2.36587e-08	4e-06	g103;g201;g294;g749;g789;g1192;g1278;g1462;g1493;g1631;g1716;g1742;g1794;g1889;g2295;g2376;g2388;g2534;g2781;g2882;g2929;g3090;g3094;g3117;g3260;g3335;g3384;g3410;g3422;g3444;g3455;g3478;g3511;g3529;g3696;g3875;g3898;g3945;g3952;g3987;g4067;g4174;g4205;g4226;g4374;g4523;g4680;g4738;g5027;g5113;g5137;g5429;g5485;g5651;g5763;g5953;g6093;g6284;g6303;g6379;g6670;g7283;g7391;g7809;g7877;g8008;g8226;g8…
51	GO:0051028	mRNA transport	40 (4.44%)	147 (1.8%)	3.12059e-08	5e-06	g294;g1015;g1761;g2111;g3335;g3343;g3356;g3411;g3427;g3453;g3482;g3853;g4067;g5113;g5752;g6074;g6340;g6670;g6720;g6755;g6839;g6924;g6990;g7781;g7877;g8732;g10012;g10226;g588;g6838;g7227;g10465;g1169;g1291;g1985;g4807;g4829;g4862;g7940;g8064
52	GO:0051246	regulation of protein metabolic process	197 (21.89%)	1265 (15.47%)	3.84512e-08	6e-06	g294;g496;g618;g719;g789;g1107;g1192;g1193;g1278;g1292;g1335;g1380;g1398;g1588;g1600;g1637;g1717;g1881;g1890;g1935;g2013;g2028;g2067;g2670;g2864;g2865;g2882;g2967;g3090;g3117;g3208;g3356;g3384;g3407;g3411;g3421;g3422;g3428;g3455;g3482;g3537;g3701;g3800;g3831;g3882;g3938;g3945;g3952;g4067;g4340;g4374;g4433;g4523;g4545;g4680;g4805;g4842;g4859;g4933;g4995;g5113;g5137;g5356;g5429;g5651;g5747;g5752;g5…
53	GO:0044703	multi-organism reproductive process	187 (20.78%)	1189 (14.54%)	4.50931e-08	7e-06	g103;g201;g294;g749;g784;g789;g1192;g1278;g1398;g1462;g1493;g1554;g1588;g1600;g1631;g1716;g1742;g1758;g1794;g1878;g1889;g1938;g2295;g2376;g2388;g2534;g2781;g2882;g2929;g3090;g3094;g3117;g3260;g3312;g3335;g3384;g3410;g3422;g3444;g3455;g3478;g3511;g3529;g3696;g3875;g3886;g3898;g3938;g3945;g3952;g3987;g4067;g4174;g4205;g4226;g4374;g4523;g4601;g4665;g4680;g4738;g4777;g5027;g5113;g5137;g5275;g5429;g54…
54	GO:0016568	chromatin modification	86 (9.56%)	441 (5.39%)	4.71054e-08	7e-06	g198;g579;g580;g789;g1278;g1462;g1499;g1500;g2249;g2376;g2473;g2534;g2661;g2781;g2929;g3396;g3422;g3831;g3875;g3882;g3987;g4226;g4433;g4523;g4531;g4557;g4842;g4859;g5575;g5953;g6285;g6295;g6340;g6422;g6759;g6780;g6815;g6840;g6919;g7283;g7319;g7687;g7748;g7866;g8362;g8503;g8508;g8525;g8657;g8727;g8735;g9011;g9206;g9218;g9254;g9612;g9675;g9793;g10009;g10070;g10226;g10447;g10599;g1255;g3202;g5026;g5…
55	GO:0007292	female gamete generation	112 (12.44%)	624 (7.63%)	4.74759e-08	7e-06	g103;g201;g294;g749;g789;g1192;g1278;g1462;g1493;g1631;g1716;g1742;g1794;g2295;g2376;g2534;g2882;g2929;g3090;g3094;g3117;g3260;g3335;g3384;g3410;g3444;g3455;g3478;g3529;g3696;g3875;g3898;g3945;g3952;g4067;g4174;g4205;g4374;g4680;g4738;g5027;g5113;g5137;g5485;g5651;g5763;g5953;g6093;g6303;g6670;g7391;g7877;g8008;g8362;g8496;g8503;g8638;g8654;g8764;g8766;g8778;g8801;g8868;g9011;g9206;g9231;g9254;g9…
56	GO:0051704	multi-organism process	269 (29.89%)	1850 (22.62%)	4.85836e-08	7e-06	g73;g103;g175;g201;g294;g496;g657;g749;g784;g789;g806;g807;g873;g955;g1008;g1192;g1278;g1398;g1462;g1493;g1554;g1588;g1600;g1631;g1691;g1716;g1742;g1758;g1794;g1878;g1889;g1890;g1935;g1938;g1964;g2295;g2376;g2388;g2534;g2711;g2714;g2781;g2882;g2929;g2980;g3090;g3094;g3117;g3125;g3260;g3281;g3312;g3335;g3343;g3356;g3384;g3410;g3411;g3422;g3427;g3444;g3453;g3455;g3478;g3486;g3511;g3529;g3696;g3725;…
57	GO:0033554	cellular response to stress	213 (23.67%)	1399 (17.11%)	5.96696e-08	8e-06	g63;g103;g201;g294;g496;g502;g655;g657;g728;g749;g765;g806;g807;g981;g1008;g1107;g1221;g1335;g1365;g1500;g1588;g1600;g1691;g1713;g1819;g1881;g1890;g1911;g1964;g2013;g2067;g2249;g2270;g2295;g2623;g2674;g2742;g2763;g2781;g2858;g2865;g2929;g2980;g3074;g3117;g3125;g3281;g3310;g3384;g3407;g3411;g3419;g3422;g3427;g3486;g3627;g3696;g3701;g3800;g3831;g3882;g3938;g3945;g4174;g4340;g4366;g4427;g4433;g4523;…
58	GO:0019953	sexual reproduction	173 (19.22%)	1086 (13.28%)	6.7028e-08	9e-06	g103;g201;g294;g749;g784;g789;g1192;g1278;g1398;g1462;g1493;g1554;g1588;g1631;g1716;g1742;g1758;g1794;g1889;g2295;g2376;g2388;g2534;g2781;g2882;g2929;g3090;g3094;g3117;g3260;g3335;g3384;g3410;g3422;g3444;g3455;g3478;g3511;g3529;g3696;g3875;g3886;g3898;g3938;g3945;g3952;g3987;g4067;g4174;g4205;g4226;g4374;g4523;g4601;g4665;g4680;g4738;g4777;g5027;g5113;g5137;g5275;g5429;g5485;g5554;g5621;g5622;g56…
59	GO:0032502	developmental process	462 (51.33%)	3521 (43.05%)	7.30502e-08	1e-05	g63;g103;g201;g294;g384;g496;g527;g563;g618;g624;g655;g657;g710;g719;g728;g749;g765;g784;g789;g806;g807;g929;g932;g1008;g1015;g1107;g1192;g1193;g1217;g1221;g1278;g1335;g1362;g1398;g1462;g1464;g1480;g1493;g1495;g1500;g1554;g1588;g1631;g1637;g1691;g1717;g1742;g1758;g1794;g1845;g1878;g1881;g1889;g1935;g1938;g1948;g1965;g1971;g1991;g2004;g2013;g2025;g2028;g2206;g2295;g2364;g2368;g2376;g2388;g2473;g26…
60	GO:0032446	protein modification by small protein conjugation	91 (10.11%)	481 (5.88%)	8.32048e-08	1.1e-05	g496;g502;g522;g618;g789;g1398;g1480;g1588;g1964;g2028;g2251;g2473;g2680;g2781;g2980;g3090;g3384;g3411;g3422;g3831;g3882;g4138;g4226;g4433;g4517;g4545;g4552;g4680;g4859;g5132;g5219;g5275;g5356;g5393;g5398;g5400;g5651;g6032;g6098;g6170;g6340;g6572;g6815;g7028;g7087;g7290;g7319;g7748;g7781;g7951;g8226;g8496;g8503;g8508;g8525;g8607;g8778;g9853;g9869;g9960;g10112;g10227;g10255;g10447;g10599;g1834;g27…
61	GO:0016197	endosomal transport	49 (5.44%)	205 (2.51%)	8.50815e-08	1.1e-05	g63;g69;g103;g509;g1008;g1845;g1878;g2249;g2368;g2763;g2967;g3384;g3429;g3455;g3478;g3725;g4205;g4777;g5089;g5730;g5971;g6093;g6470;g6813;g6982;g7290;g7391;g7629;g8008;g8496;g8525;g8607;g8778;g8973;g9021;g9198;g9820;g10246;g10270;g10650;g4974;g591;g2660;g3621;g5616;g6770;g7984;g8495;g8738
62	GO:0007275	multicellular organism development	399 (44.33%)	2968 (36.29%)	8.79919e-08	1.1e-05	g63;g103;g201;g294;g384;g496;g527;g563;g618;g624;g655;g657;g710;g719;g749;g765;g784;g789;g806;g807;g929;g1008;g1015;g1107;g1192;g1193;g1217;g1221;g1278;g1362;g1398;g1462;g1464;g1480;g1493;g1554;g1588;g1631;g1637;g1691;g1717;g1742;g1794;g1845;g1889;g1935;g1938;g1948;g1965;g1971;g1991;g2004;g2013;g2025;g2028;g2206;g2295;g2364;g2368;g2376;g2473;g2670;g2679;g2707;g2763;g2781;g2882;g2929;g2967;g2976;g…
63	GO:0045184	establishment of protein localization	203 (22.56%)	1328 (16.24%)	1.00442e-07	1.3e-05	g69;g103;g496;g657;g749;g806;g829;g932;g981;g1008;g1015;g1192;g1335;g1500;g1554;g1588;g1716;g1761;g1794;g1845;g1877;g1878;g1938;g1971;g2004;g2013;g2067;g2111;g2136;g2206;g2249;g2295;g2388;g2623;g2693;g2763;g2882;g2929;g2967;g2976;g2980;g3094;g3144;g3216;g3260;g3310;g3312;g3339;g3343;g3356;g3377;g3384;g3411;g3419;g3422;g3427;g3444;g3445;g3453;g3455;g3478;g3482;g3486;g3725;g3853;g4067;g4205;g4301;g…
64	GO:0016458	gene silencing	62 (6.89%)	288 (3.52%)	1.07327e-07	1.3e-05	g198;g294;g789;g1278;g1462;g1499;g1500;g1889;g2376;g2661;g3094;g3125;g3356;g3411;g3427;g3831;g3945;g4415;g4517;g4531;g4565;g5027;g5763;g5862;g5953;g6074;g6284;g6285;g6670;g6776;g6780;g6842;g6924;g7283;g7866;g8065;g8384;g8503;g8657;g8727;g8873;g9206;g9612;g9675;g9793;g10226;g10264;g10447;g10553;g10599;g3202;g6066;g1955;g3140;g3207;g4863;g5160;g5674;g6067;g7475;g8574;g8941
65	GO:0015833	peptide transport	158 (17.56%)	978 (11.96%)	1.13073e-07	1.4e-05	g69;g103;g496;g749;g806;g829;g1008;g1015;g1335;g1554;g1716;g1761;g1794;g1845;g1877;g1878;g1971;g2004;g2013;g2111;g2206;g2295;g2388;g2623;g2693;g2763;g2882;g2967;g2980;g3094;g3144;g3216;g3260;g3312;g3339;g3343;g3356;g3377;g3411;g3419;g3422;g3427;g3444;g3445;g3453;g3455;g3478;g3482;g3486;g3725;g3853;g3902;g4067;g4205;g4301;g4366;g4374;g4523;g4545;g4576;g4777;g4805;g5089;g5113;g5126;g5139;g5203;g537…
66	GO:0033043	regulation of organelle organization	135 (15%)	804 (9.83%)	1.16735e-07	1.4e-05	g63;g103;g201;g294;g496;g618;g749;g765;g789;g1192;g1221;g1278;g1462;g1464;g1493;g1499;g1500;g1631;g1637;g1761;g2206;g2249;g2368;g2376;g2661;g2670;g2929;g2980;g3260;g3310;g3312;g3335;g3339;g3375;g3384;g3410;g3411;g3422;g3453;g3456;g3478;g3537;g3725;g3831;g3945;g4433;g4531;g4557;g4584;g4738;g4805;g4993;g5089;g5429;g5485;g6029;g6032;g6074;g6170;g6203;g6284;g6572;g6766;g6780;g6842;g6899;g6919;g7283;g…
67	GO:0048523	negative regulation of cellular process	294 (32.67%)	2075 (25.37%)	1.17763e-07	1.4e-05	g63;g73;g103;g198;g201;g294;g496;g563;g579;g580;g618;g719;g728;g753;g789;g1015;g1217;g1221;g1278;g1380;g1398;g1462;g1464;g1499;g1500;g1588;g1637;g1691;g1717;g1890;g1935;g1948;g1965;g1991;g2013;g2028;g2067;g2206;g2295;g2376;g2661;g2670;g2781;g2865;g2882;g2929;g2967;g2980;g3090;g3094;g3260;g3310;g3318;g3356;g3375;g3384;g3393;g3396;g3407;g3410;g3411;g3422;g3427;g3447;g3455;g3456;g3486;g3537;g3696;g3…
68	GO:0050657	nucleic acid transport	51 (5.67%)	220 (2.69%)	1.32106e-07	1.5e-05	g103;g294;g749;g1015;g1752;g1761;g2111;g3335;g3343;g3356;g3411;g3427;g3453;g3482;g3853;g3886;g4067;g4738;g5113;g5139;g5752;g6074;g6340;g6670;g6720;g6755;g6839;g6924;g6990;g7781;g7877;g8390;g8607;g8732;g9218;g10012;g10226;g197;g588;g6838;g7227;g10465;g1169;g1291;g1718;g1985;g4807;g4829;g4862;g7940;g8064
69	GO:0051236	establishment of RNA localization	51 (5.67%)	221 (2.7%)	1.53981e-07	1.8e-05	g103;g294;g749;g1015;g1752;g1761;g2111;g3335;g3343;g3356;g3411;g3427;g3453;g3482;g3853;g4067;g4738;g5113;g5139;g5752;g6074;g6340;g6670;g6720;g6755;g6839;g6924;g6990;g7781;g7877;g8362;g8390;g8607;g8732;g9218;g10012;g10226;g197;g588;g6838;g7227;g10465;g1169;g1291;g1718;g1985;g4807;g4829;g4862;g7940;g8064
70	GO:0051301	cell division	133 (14.78%)	794 (9.71%)	1.70468e-07	1.9e-05	g103;g201;g496;g618;g657;g719;g749;g753;g789;g1008;g1192;g1221;g1464;g1493;g1500;g1758;g1794;g2247;g2388;g2670;g2882;g2929;g3260;g3335;g3344;g3375;g3384;g3410;g3419;g3422;g3453;g3456;g3478;g3486;g3537;g3952;g4205;g4374;g4680;g4738;g4805;g4897;g4989;g5393;g5467;g5554;g5621;g5622;g5627;g5650;g5651;g6007;g6029;g6170;g6203;g6289;g6303;g6327;g6379;g6572;g6621;g6670;g6759;g6776;g6839;g6899;g6919;g7283;…
71	GO:0080090	regulation of primary metabolic process	381 (42.33%)	2826 (34.56%)	1.70507e-07	1.9e-05	g73;g103;g198;g294;g496;g579;g580;g618;g719;g728;g753;g789;g945;g955;g1008;g1107;g1192;g1193;g1217;g1221;g1278;g1292;g1335;g1365;g1380;g1398;g1462;g1464;g1499;g1500;g1588;g1600;g1637;g1691;g1717;g1752;g1761;g1881;g1890;g1911;g1935;g1948;g1991;g2013;g2028;g2067;g2206;g2249;g2270;g2318;g2376;g2473;g2661;g2670;g2679;g2781;g2864;g2865;g2882;g2929;g2967;g3090;g3094;g3117;g3183;g3208;g3310;g3343;g3356;…
72	GO:0043933	macromolecular complex subunit organization	266 (29.56%)	1850 (22.62%)	1.77466e-07	2e-05	g73;g103;g198;g201;g294;g579;g580;g615;g618;g655;g719;g749;g765;g789;g945;g955;g1192;g1278;g1335;g1462;g1493;g1499;g1500;g1524;g1588;g1631;g1637;g1742;g1752;g1758;g1845;g1890;g1911;g1948;g2004;g2013;g2249;g2368;g2376;g2473;g2534;g2647;g2661;g2670;g2781;g2861;g2882;g2929;g3094;g3208;g3260;g3312;g3335;g3356;g3375;g3384;g3396;g3407;g3411;g3421;g3422;g3427;g3453;g3455;g3478;g3696;g3725;g3831;g3853;g3…
73	GO:0051171	regulation of nitrogen compound metabolic process	367 (40.78%)	2710 (33.14%)	2.16887e-07	2.4e-05	g73;g103;g198;g294;g496;g579;g580;g719;g728;g753;g789;g945;g955;g1008;g1107;g1192;g1193;g1217;g1221;g1278;g1292;g1335;g1365;g1380;g1398;g1462;g1464;g1499;g1500;g1588;g1600;g1637;g1691;g1717;g1752;g1761;g1881;g1890;g1911;g1935;g1948;g1991;g2013;g2028;g2067;g2206;g2249;g2270;g2318;g2376;g2473;g2661;g2670;g2679;g2781;g2864;g2865;g2882;g2929;g2967;g3090;g3094;g3117;g3183;g3208;g3310;g3343;g3356;g3375…
74	GO:0070647	protein modification by small protein conjugation or removal	107 (11.89%)	606 (7.41%)	2.33495e-07	2.5e-05	g496;g502;g522;g618;g789;g1217;g1398;g1480;g1588;g1964;g2028;g2251;g2473;g2680;g2781;g2980;g3090;g3384;g3411;g3422;g3455;g3831;g3882;g4138;g4226;g4374;g4415;g4433;g4517;g4523;g4545;g4552;g4680;g4842;g4859;g5132;g5219;g5275;g5356;g5393;g5398;g5400;g5626;g5651;g6032;g6098;g6170;g6203;g6340;g6572;g6759;g6780;g6815;g7028;g7087;g7290;g7319;g7629;g7748;g7781;g7951;g8226;g8496;g8503;g8508;g8525;g8607;g8…
75	GO:0050658	RNA transport	50 (5.56%)	218 (2.67%)	2.49911e-07	2.6e-05	g103;g294;g749;g1015;g1752;g1761;g2111;g3335;g3343;g3356;g3411;g3427;g3453;g3482;g3853;g4067;g4738;g5113;g5139;g5752;g6074;g6340;g6670;g6720;g6755;g6839;g6924;g6990;g7781;g7877;g8390;g8607;g8732;g9218;g10012;g10226;g197;g588;g6838;g7227;g10465;g1169;g1291;g1718;g1985;g4807;g4829;g4862;g7940;g8064
76	GO:0007281	germ cell development	119 (13.22%)	697 (8.52%)	2.99716e-07	3.1e-05	g103;g201;g294;g749;g1192;g1278;g1462;g1631;g1742;g1794;g1889;g2295;g2376;g2781;g2882;g2929;g3090;g3094;g3117;g3260;g3384;g3410;g3422;g3444;g3455;g3478;g3511;g3529;g3696;g3875;g3898;g3945;g3952;g4067;g4174;g4205;g4523;g4680;g4738;g5027;g5113;g5137;g5429;g5485;g5651;g5763;g5953;g6093;g6303;g6379;g6670;g7283;g7391;g8008;g8226;g8384;g8496;g8503;g8638;g8654;g8764;g8778;g8801;g8868;g9011;g9113;g9206;g…
77	GO:0048609	multicellular organismal reproductive process	172 (19.11%)	1102 (13.48%)	3.14418e-07	3.2e-05	g103;g201;g294;g749;g784;g789;g1192;g1278;g1398;g1462;g1493;g1588;g1600;g1631;g1716;g1742;g1758;g1794;g1878;g1889;g2295;g2376;g2388;g2534;g2781;g2882;g2929;g3090;g3094;g3117;g3260;g3312;g3335;g3384;g3410;g3422;g3444;g3455;g3478;g3511;g3529;g3696;g3875;g3886;g3898;g3938;g3945;g3952;g3987;g4067;g4174;g4205;g4374;g4523;g4601;g4665;g4680;g4738;g5027;g5113;g5137;g5275;g5429;g5485;g5554;g5621;g5622;g56…
78	GO:0009057	macromolecule catabolic process	155 (17.22%)	971 (11.87%)	3.3722e-07	3.4e-05	g294;g496;g502;g618;g657;g719;g789;g873;g1008;g1193;g1217;g1335;g1398;g1464;g1500;g1588;g1713;g1761;g1877;g1964;g2025;g2251;g2376;g2473;g2697;g2781;g2967;g2980;g3090;g3117;g3220;g3343;g3356;g3384;g3410;g3411;g3421;g3422;g3455;g3831;g3882;g3886;g3938;g3945;g4067;g4145;g4226;g4374;g4415;g4433;g4517;g4523;g4545;g4552;g4576;g4680;g4733;g4844;g4993;g5113;g5132;g5203;g5268;g5275;g5650;g5651;g5752;g5763…
79	GO:0051172	negative regulation of nitrogen compound metabolic process	178 (19.78%)	1153 (14.1%)	4.00445e-07	4e-05	g73;g103;g198;g294;g496;g579;g580;g719;g728;g789;g1217;g1221;g1278;g1380;g1462;g1464;g1499;g1500;g1588;g1637;g1691;g1890;g1935;g2013;g2028;g2067;g2376;g2661;g2670;g2781;g2865;g2882;g2929;g2967;g3094;g3310;g3356;g3375;g3384;g3393;g3407;g3410;g3411;g3421;g3422;g3427;g3486;g3696;g3800;g3831;g3882;g3945;g4067;g4138;g4374;g4433;g4517;g4531;g4545;g4557;g4565;g4680;g4842;g4859;g5275;g5356;g5393;g5467;g5…
80	GO:1901564	organonitrogen compound metabolic process	432 (48%)	3295 (40.29%)	4.14343e-07	4.1e-05	g63;g73;g95;g99;g103;g175;g198;g201;g213;g294;g496;g502;g522;g563;g579;g580;g624;g655;g657;g719;g749;g765;g789;g807;g829;g981;g1008;g1107;g1192;g1193;g1217;g1292;g1335;g1362;g1365;g1380;g1398;g1480;g1588;g1600;g1637;g1713;g1716;g1717;g1742;g1877;g1881;g1893;g1964;g2004;g2013;g2067;g2249;g2251;g2270;g2368;g2376;g2473;g2623;g2625;g2670;g2674;g2680;g2697;g2723;g2742;g2781;g2864;g2929;g2940;g2980;g30…
81	GO:0071702	organic substance transport	248 (27.56%)	1719 (21.02%)	4.35256e-07	4.3e-05	g69;g103;g201;g294;g496;g657;g749;g765;g806;g829;g932;g981;g1008;g1015;g1107;g1335;g1495;g1500;g1554;g1691;g1716;g1752;g1761;g1794;g1845;g1877;g1878;g1881;g1938;g1971;g2004;g2013;g2067;g2111;g2136;g2206;g2249;g2295;g2388;g2623;g2670;g2693;g2711;g2742;g2763;g2882;g2967;g2976;g2980;g3094;g3144;g3216;g3260;g3310;g3312;g3335;g3339;g3343;g3356;g3377;g3384;g3411;g3419;g3422;g3427;g3444;g3445;g3453;g345…
82	GO:0043170	macromolecule metabolic process	627 (69.67%)	5088 (62.22%)	4.47501e-07	4.3e-05	g41;g63;g69;g73;g99;g103;g175;g198;g201;g294;g496;g497;g502;g509;g514;g522;g527;g563;g579;g580;g618;g655;g657;g710;g719;g728;g749;g753;g765;g789;g806;g807;g829;g873;g932;g945;g955;g981;g1008;g1015;g1088;g1107;g1192;g1193;g1217;g1221;g1278;g1292;g1335;g1362;g1365;g1380;g1398;g1462;g1464;g1480;g1499;g1500;g1524;g1588;g1600;g1637;g1691;g1713;g1716;g1717;g1742;g1752;g1758;g1761;g1819;g1877;g1881;g188…
83	GO:0050896	response to stimulus	514 (57.11%)	4035 (49.34%)	4.47519e-07	4.3e-05	g63;g73;g83;g103;g198;g201;g294;g384;g496;g502;g527;g563;g580;g587;g624;g655;g657;g710;g728;g749;g765;g771;g789;g806;g807;g929;g932;g955;g981;g1008;g1015;g1107;g1192;g1217;g1221;g1278;g1335;g1362;g1365;g1380;g1398;g1495;g1500;g1554;g1588;g1600;g1631;g1637;g1691;g1713;g1716;g1819;g1845;g1878;g1881;g1890;g1911;g1935;g1948;g1964;g1965;g1991;g2004;g2005;g2013;g2028;g2067;g2120;g2206;g2249;g2270;g2295…
84	GO:1902580	single-organism cellular localization	147 (16.33%)	915 (11.19%)	4.89732e-07	4.6e-05	g63;g103;g201;g496;g749;g765;g829;g1008;g1015;g1192;g1493;g1554;g1588;g1600;g1716;g1742;g1794;g1877;g2004;g2013;g2028;g2136;g2364;g2388;g2693;g2882;g2929;g3094;g3335;g3339;g3411;g3422;g3427;g3444;g3453;g3455;g3478;g3725;g3853;g3945;g4067;g4205;g4301;g4366;g4374;g4523;g4576;g4584;g4641;g4738;g4805;g5089;g5113;g5126;g5132;g5139;g5203;g5356;g5375;g5554;g5621;g5622;g5650;g5651;g5747;g5752;g5984;g6007…
85	GO:0010256	endomembrane system organization	75 (8.33%)	388 (4.74%)	1e-06	4.8e-05	g103;g509;g765;g806;g1107;g1493;g1588;g2206;g2368;g2623;g2693;g3118;g3312;g3339;g3455;g3478;g3701;g3725;g3938;g4205;g4226;g4738;g4777;g5132;g5375;g5621;g5622;g5627;g5651;g5752;g5984;g6015;g6303;g6523;g6982;g7079;g7391;g7705;g8196;g8496;g8525;g8638;g8766;g8778;g9021;g9167;g9198;g9805;g10006;g10112;g10447;g10536;g588;g1310;g2743;g4974;g591;g1336;g1888;g2681;g3408;g3621;g5168;g5609;g5616;g5620;g6308…
86	GO:0048856	anatomical structure development	431 (47.89%)	3292 (40.25%)	1e-06	4.9e-05	g63;g103;g201;g294;g384;g496;g527;g563;g618;g624;g655;g657;g710;g719;g749;g765;g784;g789;g806;g807;g929;g1008;g1015;g1107;g1192;g1193;g1217;g1221;g1278;g1335;g1362;g1398;g1462;g1464;g1480;g1493;g1495;g1554;g1588;g1631;g1637;g1691;g1717;g1742;g1758;g1794;g1845;g1889;g1935;g1938;g1948;g1965;g1971;g1991;g2004;g2013;g2025;g2028;g2206;g2295;g2364;g2368;g2376;g2388;g2473;g2670;g2679;g2707;g2733;g2763;g…
87	GO:0032504	multicellular organism reproduction	174 (19.33%)	1128 (13.79%)	1e-06	5.4e-05	g103;g201;g294;g749;g784;g789;g1192;g1278;g1398;g1462;g1493;g1588;g1600;g1631;g1716;g1742;g1758;g1794;g1878;g1889;g2295;g2376;g2388;g2534;g2781;g2882;g2929;g3090;g3094;g3117;g3260;g3312;g3335;g3384;g3410;g3422;g3444;g3455;g3478;g3511;g3529;g3696;g3875;g3886;g3898;g3938;g3945;g3952;g3987;g4067;g4174;g4205;g4226;g4374;g4523;g4601;g4665;g4680;g4738;g5027;g5113;g5137;g5275;g5429;g5485;g5554;g5621;g56…
88	GO:0048477	oogenesis	101 (11.22%)	574 (7.02%)	1e-06	5.6e-05	g103;g201;g294;g749;g1192;g1278;g1462;g1631;g1742;g1794;g2295;g2376;g2882;g2929;g3090;g3094;g3117;g3260;g3384;g3410;g3444;g3455;g3478;g3529;g3696;g3875;g3898;g3945;g3952;g4067;g4174;g4205;g4680;g4738;g5027;g5113;g5137;g5485;g5651;g5763;g5953;g6093;g6303;g6670;g7391;g8008;g8496;g8503;g8638;g8654;g8764;g8778;g8801;g8868;g9011;g9206;g9231;g9254;g9548;g9612;g9675;g9793;g10070;g10226;g10536;g10650;g58…
89	GO:0016567	protein ubiquitination	85 (9.44%)	460 (5.62%)	1e-06	5.9e-05	g496;g502;g522;g618;g789;g1398;g1480;g1588;g1964;g2028;g2251;g2473;g2680;g2781;g2980;g3090;g3384;g3411;g3422;g3831;g3882;g4138;g4226;g4433;g4517;g4545;g4552;g4680;g4859;g5132;g5219;g5275;g5398;g5400;g5651;g6032;g6098;g6170;g6340;g6572;g6815;g7028;g7087;g7290;g7319;g7748;g7951;g8226;g8496;g8503;g8508;g8525;g8607;g8778;g9853;g9869;g9960;g10112;g10227;g10255;g10447;g10599;g1834;g2743;g5563;g594;g711…
90	GO:0015931	nucleobase-containing compound transport	56 (6.22%)	264 (3.23%)	1e-06	6.6e-05	g103;g294;g749;g1015;g1752;g1761;g2111;g3335;g3343;g3356;g3411;g3427;g3453;g3455;g3482;g3853;g3886;g4067;g4738;g5113;g5139;g5752;g6074;g6340;g6670;g6720;g6755;g6839;g6924;g6990;g7781;g7877;g8390;g8496;g8607;g8732;g9218;g9318;g10012;g10226;g197;g588;g6838;g7227;g10465;g595;g1169;g1291;g1718;g1985;g4807;g4829;g4862;g7940;g8064;g8570
91	GO:0022402	cell cycle process	172 (19.11%)	1122 (13.72%)	1e-06	9.3e-05	g103;g201;g496;g522;g618;g728;g749;g753;g789;g1008;g1192;g1221;g1464;g1493;g1588;g1713;g1716;g1717;g1742;g1758;g1794;g1889;g2067;g2376;g2388;g2534;g2670;g2882;g2929;g3094;g3335;g3375;g3384;g3407;g3410;g3411;g3419;g3422;g3453;g3455;g3456;g3478;g3486;g3537;g3620;g3696;g3831;g3945;g4174;g4680;g4738;g4805;g4897;g5132;g5268;g5356;g5393;g5467;g5554;g5621;g5622;g5650;g5651;g6007;g6029;g6170;g6203;g6284;…
92	GO:0032388	positive regulation of intracellular transport	34 (3.78%)	131 (1.6%)	1e-06	9.7e-05	g496;g749;g765;g1752;g1878;g2206;g2368;g2763;g3144;g3312;g3339;g3422;g3455;g3478;g4805;g5356;g5375;g5651;g5752;g6295;g6815;g6899;g7781;g8525;g8548;g9218;g10070;g10270;g588;g7227;g654;g3408;g4807;g7984
93	GO:0032501	multicellular organismal process	476 (52.89%)	3716 (45.44%)	1e-06	0.000105	g63;g103;g201;g294;g384;g496;g527;g563;g618;g624;g655;g657;g710;g719;g728;g749;g765;g784;g789;g806;g807;g929;g932;g955;g1008;g1015;g1107;g1192;g1193;g1217;g1221;g1278;g1335;g1362;g1398;g1462;g1464;g1480;g1493;g1554;g1588;g1600;g1631;g1637;g1691;g1716;g1717;g1742;g1758;g1794;g1845;g1878;g1889;g1935;g1938;g1948;g1965;g1971;g1991;g2004;g2013;g2025;g2028;g2120;g2206;g2295;g2364;g2368;g2376;g2388;g247…
94	GO:0044707	single-multicellular organism process	429 (47.67%)	3296 (40.3%)	1e-06	0.000106	g63;g103;g201;g294;g384;g496;g527;g563;g618;g624;g655;g657;g710;g719;g749;g765;g784;g789;g806;g807;g929;g932;g1008;g1015;g1107;g1192;g1193;g1217;g1221;g1278;g1335;g1362;g1398;g1462;g1464;g1480;g1493;g1554;g1588;g1631;g1637;g1691;g1717;g1742;g1794;g1845;g1889;g1935;g1938;g1948;g1965;g1971;g1991;g2004;g2013;g2025;g2028;g2120;g2206;g2295;g2364;g2368;g2376;g2388;g2473;g2670;g2679;g2693;g2707;g2763;g2…
95	GO:0030154	cell differentiation	296 (32.89%)	2144 (26.22%)	1e-06	0.000115	g63;g103;g201;g294;g496;g527;g563;g657;g710;g728;g749;g765;g789;g929;g1008;g1015;g1192;g1193;g1278;g1335;g1398;g1462;g1480;g1493;g1495;g1588;g1631;g1691;g1717;g1742;g1794;g1889;g1935;g1948;g1991;g2013;g2028;g2295;g2364;g2368;g2376;g2670;g2707;g2733;g2763;g2781;g2882;g2929;g2967;g2976;g3090;g3094;g3117;g3216;g3260;g3310;g3344;g3375;g3384;g3396;g3410;g3422;g3427;g3444;g3447;g3455;g3478;g3511;g3529;…
96	GO:0006997	nucleus organization	35 (3.89%)	138 (1.69%)	1e-06	0.000117	g749;g1015;g1938;g2534;g3335;g3410;g3422;g3427;g3453;g4226;g4523;g4738;g5429;g5621;g5622;g5752;g5984;g6340;g6839;g6842;g7781;g8638;g9113;g10447;g588;g6838;g654;g1169;g1632;g1888;g3621;g5620;g7475;g7727;g8574
97	GO:0015031	protein transport	191 (21.22%)	1279 (15.64%)	1e-06	0.000122	g69;g103;g496;g657;g749;g806;g829;g932;g981;g1008;g1015;g1335;g1500;g1554;g1716;g1761;g1794;g1845;g1877;g1878;g1938;g1971;g2004;g2013;g2067;g2111;g2136;g2206;g2249;g2295;g2388;g2623;g2693;g2763;g2882;g2967;g2976;g2980;g3094;g3144;g3216;g3260;g3310;g3312;g3339;g3343;g3356;g3377;g3384;g3411;g3419;g3422;g3427;g3444;g3445;g3453;g3455;g3478;g3482;g3486;g3725;g3853;g4067;g4205;g4301;g4366;g4374;g4427;g…
98	GO:0009056	catabolic process	244 (27.11%)	1713 (20.95%)	2e-06	0.000135	g63;g103;g294;g496;g502;g580;g615;g618;g657;g719;g765;g789;g873;g1008;g1088;g1193;g1217;g1221;g1335;g1398;g1464;g1500;g1588;g1713;g1717;g1761;g1877;g1881;g1964;g2025;g2120;g2249;g2251;g2295;g2376;g2473;g2697;g2763;g2781;g2967;g2980;g3090;g3117;g3135;g3220;g3312;g3343;g3356;g3384;g3410;g3411;g3421;g3422;g3455;g3627;g3831;g3882;g3886;g3938;g3945;g4067;g4138;g4145;g4226;g4374;g4415;g4433;g4517;g4523…
99	GO:0051716	cellular response to stimulus	415 (46.11%)	3180 (38.88%)	2e-06	0.000138	g63;g73;g103;g198;g201;g294;g384;g496;g502;g527;g563;g580;g587;g624;g655;g657;g710;g728;g749;g765;g771;g789;g806;g807;g929;g981;g1008;g1015;g1107;g1192;g1217;g1221;g1335;g1362;g1365;g1380;g1398;g1500;g1554;g1588;g1600;g1637;g1691;g1713;g1716;g1819;g1845;g1881;g1890;g1911;g1935;g1948;g1964;g1965;g1991;g2013;g2028;g2067;g2206;g2249;g2270;g2295;g2368;g2388;g2623;g2670;g2674;g2680;g2693;g2707;g2724;g…
100	GO:0031324	negative regulation of cellular metabolic process	191 (21.22%)	1284 (15.7%)	2e-06	0.000156	g73;g103;g198;g294;g496;g579;g580;g618;g719;g728;g789;g1217;g1221;g1278;g1380;g1462;g1464;g1499;g1500;g1588;g1637;g1691;g1717;g1890;g1935;g2013;g2028;g2067;g2376;g2661;g2670;g2781;g2865;g2882;g2929;g2967;g3094;g3310;g3318;g3356;g3375;g3384;g3393;g3407;g3410;g3411;g3422;g3427;g3486;g3696;g3800;g3831;g3882;g3945;g4067;g4138;g4374;g4433;g4517;g4531;g4545;g4557;g4565;g4680;g4842;g4859;g4993;g5275;g53…
101	GO:0009966	regulation of signal transduction	181 (20.11%)	1206 (14.75%)	2e-06	0.000173	g103;g496;g527;g563;g624;g710;g789;g1192;g1217;g1380;g1398;g1600;g1691;g1845;g1890;g1935;g1948;g1991;g2013;g2028;g2249;g2270;g2295;g2388;g2670;g2674;g2707;g2733;g2865;g2882;g2967;g3090;g3117;g3281;g3344;g3375;g3384;g3396;g3422;g3429;g3445;g3447;g3455;g3456;g3627;g3701;g3800;g3831;g3882;g3898;g3909;g3938;g3945;g4226;g4301;g4415;g4545;g4552;g4576;g4584;g4680;g4805;g4842;g4989;g5089;g5356;g5375;g539…
102	GO:0048869	cellular developmental process	322 (35.78%)	2378 (29.08%)	2e-06	0.000183	g63;g103;g201;g294;g496;g527;g563;g657;g710;g728;g749;g765;g789;g929;g1008;g1015;g1107;g1192;g1193;g1221;g1278;g1335;g1398;g1462;g1480;g1493;g1495;g1588;g1631;g1691;g1717;g1742;g1758;g1794;g1881;g1889;g1935;g1948;g1991;g2013;g2028;g2295;g2364;g2368;g2376;g2388;g2670;g2707;g2733;g2763;g2781;g2882;g2929;g2967;g2976;g3090;g3094;g3117;g3216;g3260;g3310;g3344;g3375;g3384;g3396;g3410;g3422;g3427;g3444;…
103	GO:0032386	regulation of intracellular transport	52 (5.78%)	247 (3.02%)	2e-06	0.000183	g63;g496;g749;g765;g1752;g1878;g2013;g2206;g2368;g2763;g3144;g3312;g3339;g3422;g3453;g3455;g3478;g4205;g4301;g4584;g4805;g5356;g5375;g5651;g5752;g6032;g6295;g6572;g6670;g6815;g6899;g7290;g7781;g8525;g8548;g8732;g9218;g9820;g10070;g10255;g10270;g588;g7227;g654;g1985;g3408;g4807;g5168;g5616;g7984;g8570;g10269
104	GO:0008152	metabolic process	744 (82.67%)	6273 (76.71%)	2e-06	0.000188	g41;g63;g69;g73;g83;g95;g99;g103;g175;g198;g201;g213;g294;g384;g496;g497;g502;g509;g514;g522;g527;g563;g579;g580;g615;g618;g624;g655;g657;g710;g719;g728;g749;g753;g765;g789;g806;g807;g829;g873;g929;g932;g945;g955;g981;g1008;g1015;g1088;g1107;g1192;g1193;g1217;g1221;g1278;g1292;g1335;g1362;g1365;g1380;g1398;g1462;g1464;g1480;g1499;g1500;g1524;g1554;g1588;g1600;g1637;g1691;g1713;g1716;g1717;g1742;g…
105	GO:1903651	positive regulation of cytoplasmic transport	25 (2.78%)	85 (1.04%)	3e-06	0.000198	g496;g749;g1752;g1878;g2763;g3144;g3312;g3422;g3455;g4805;g5356;g5375;g5651;g5752;g6295;g6899;g7781;g8525;g9218;g10070;g10270;g588;g654;g3408;g4807
106	GO:0016265	death	136 (15.11%)	856 (10.47%)	3e-06	0.0002	g63;g103;g201;g294;g496;g753;g765;g789;g945;g1008;g1015;g1362;g1480;g1588;g1717;g1890;g1948;g2013;g2028;g2067;g2295;g2670;g2781;g2882;g2929;g3090;g3260;g3384;g3445;g3456;g3701;g3831;g4417;g4517;g4545;g4576;g4680;g4733;g4738;g4805;g4893;g4993;g5025;g5275;g5356;g5608;g5651;g5673;g5747;g5752;g5763;g6018;g6032;g6093;g6098;g6284;g6295;g6340;g6523;g6752;g6755;g6759;g6776;g6800;g6840;g6842;g6899;g6982;g…
107	GO:0016482	cytoplasmic transport	136 (15.11%)	857 (10.48%)	3e-06	0.000211	g63;g69;g103;g496;g509;g657;g749;g829;g1008;g1015;g1554;g1752;g1761;g1845;g1877;g1878;g1938;g1971;g2013;g2111;g2136;g2295;g2388;g2763;g2967;g3094;g3144;g3216;g3312;g3343;g3356;g3377;g3411;g3422;g3427;g3453;g3455;g3478;g3482;g3725;g3853;g4067;g4205;g4301;g4366;g4374;g4523;g4545;g4576;g4777;g4805;g5089;g5113;g5139;g5203;g5356;g5375;g5554;g5650;g5651;g5752;g5971;g5984;g6074;g6093;g6295;g6340;g6358;g…
108	GO:0006886	intracellular protein transport	135 (15%)	851 (10.41%)	3e-06	0.000234	g69;g103;g496;g749;g829;g1008;g1015;g1335;g1554;g1716;g1761;g1794;g1877;g1878;g1938;g1971;g2004;g2013;g2067;g2111;g2136;g2206;g2249;g2388;g2623;g2763;g2967;g3094;g3144;g3260;g3312;g3339;g3343;g3356;g3384;g3411;g3422;g3427;g3444;g3453;g3455;g3478;g3482;g3853;g4067;g4205;g4301;g4366;g4374;g4523;g4545;g4576;g4805;g5089;g5113;g5126;g5139;g5203;g5375;g5429;g5554;g5650;g5651;g5752;g5971;g5984;g6074;g62…
109	GO:0048468	cell development	234 (26%)	1645 (20.11%)	3e-06	0.000244	g63;g103;g201;g294;g496;g527;g563;g657;g749;g765;g789;g929;g1008;g1015;g1192;g1278;g1398;g1462;g1480;g1493;g1495;g1631;g1717;g1742;g1794;g1889;g1948;g1991;g2013;g2295;g2364;g2368;g2376;g2733;g2781;g2882;g2929;g2967;g2976;g3090;g3094;g3117;g3260;g3310;g3384;g3396;g3410;g3422;g3444;g3455;g3478;g3511;g3529;g3696;g3725;g3800;g3875;g3898;g3909;g3938;g3945;g3952;g4067;g4174;g4205;g4301;g4374;g4523;g457…
110	GO:0048731	system development	322 (35.78%)	2388 (29.2%)	4e-06	0.000259	g63;g103;g201;g294;g496;g527;g563;g624;g655;g657;g710;g719;g749;g765;g789;g806;g807;g929;g1008;g1015;g1107;g1192;g1193;g1278;g1398;g1462;g1480;g1493;g1554;g1588;g1631;g1637;g1691;g1717;g1845;g1935;g1948;g1971;g1991;g2004;g2013;g2028;g2206;g2295;g2364;g2368;g2376;g2473;g2670;g2707;g2763;g2781;g2882;g2929;g2967;g2976;g3090;g3094;g3117;g3216;g3260;g3310;g3318;g3356;g3375;g3384;g3396;g3407;g3410;g341…
111	GO:0009893	positive regulation of metabolic process	242 (26.89%)	1714 (20.96%)	4e-06	0.000274	g73;g198;g496;g580;g657;g710;g765;g929;g955;g1008;g1217;g1221;g1278;g1335;g1365;g1398;g1462;g1499;g1500;g1554;g1588;g1600;g1691;g1717;g1881;g1938;g1948;g1965;g1991;g2013;g2028;g2067;g2206;g2249;g2270;g2368;g2376;g2670;g2763;g2882;g2929;g2967;g2980;g3090;g3117;g3183;g3208;g3281;g3312;g3356;g3384;g3396;g3407;g3411;g3422;g3427;g3445;g3455;g3482;g3537;g3627;g3696;g3701;g3875;g3882;g3898;g3902;g3938;g…
112	GO:0010629	negative regulation of gene expression	157 (17.44%)	1026 (12.55%)	4e-06	0.000281	g73;g198;g294;g579;g580;g657;g719;g789;g873;g1217;g1221;g1278;g1462;g1464;g1499;g1500;g1691;g1761;g1877;g1889;g1890;g2028;g2067;g2376;g2661;g2781;g3094;g3125;g3343;g3356;g3375;g3384;g3393;g3410;g3411;g3427;g3478;g3696;g3831;g3882;g3945;g4067;g4138;g4340;g4374;g4415;g4517;g4531;g4545;g4557;g4565;g4842;g5027;g5113;g5203;g5356;g5393;g5485;g5626;g5752;g5763;g5862;g5953;g6025;g6074;g6128;g6284;g6285;g…
113	GO:0008219	cell death	135 (15%)	855 (10.45%)	4e-06	0.000289	g63;g103;g201;g294;g496;g753;g765;g789;g945;g1008;g1015;g1362;g1480;g1588;g1717;g1890;g1948;g2013;g2028;g2067;g2295;g2670;g2781;g2882;g2929;g3090;g3260;g3384;g3445;g3456;g3701;g3831;g4417;g4517;g4545;g4576;g4680;g4733;g4738;g4805;g4893;g4993;g5025;g5275;g5356;g5608;g5651;g5673;g5747;g5752;g6018;g6032;g6093;g6098;g6284;g6295;g6340;g6523;g6752;g6755;g6759;g6776;g6800;g6840;g6842;g6899;g6982;g7028;g…
114	GO:0040007	growth	129 (14.33%)	809 (9.89%)	4e-06	0.00029	g63;g103;g496;g527;g563;g657;g710;g719;g765;g1192;g1221;g1335;g1398;g1499;g1691;g1717;g2013;g2364;g2670;g2707;g2781;g2882;g2929;g3117;g3356;g3384;g3422;g3455;g3627;g3701;g3831;g3853;g3898;g3909;g3938;g3945;g3952;g4374;g4415;g4545;g4601;g4792;g4893;g5251;g5356;g5485;g5651;g5862;g6018;g6032;g6093;g6122;g6170;g6273;g6303;g6327;g6379;g6470;g6759;g6775;g6815;g6842;g6899;g6924;g6979;g7028;g7319;g7635;g…
115	GO:0044238	primary metabolic process	685 (76.11%)	5706 (69.77%)	5e-06	0.000322	g41;g63;g69;g73;g99;g103;g175;g198;g201;g213;g294;g384;g496;g497;g502;g514;g522;g527;g563;g579;g580;g618;g624;g655;g657;g710;g719;g728;g749;g753;g765;g789;g807;g829;g873;g932;g945;g955;g981;g1008;g1088;g1107;g1192;g1193;g1217;g1221;g1278;g1292;g1335;g1362;g1365;g1380;g1398;g1462;g1464;g1480;g1499;g1500;g1524;g1588;g1600;g1637;g1691;g1713;g1716;g1717;g1742;g1752;g1758;g1761;g1819;g1877;g1881;g1889…
116	GO:0071704	organic substance metabolic process	706 (78.44%)	5912 (72.29%)	5e-06	0.000329	g41;g63;g69;g73;g95;g99;g103;g175;g198;g201;g213;g294;g384;g496;g497;g502;g509;g514;g522;g527;g563;g579;g580;g618;g624;g655;g657;g710;g719;g728;g749;g753;g765;g789;g806;g807;g829;g873;g932;g945;g955;g981;g1008;g1015;g1088;g1107;g1192;g1193;g1217;g1221;g1278;g1292;g1335;g1362;g1365;g1380;g1398;g1462;g1464;g1480;g1499;g1500;g1524;g1588;g1600;g1637;g1691;g1713;g1716;g1717;g1742;g1752;g1758;g1761;g18…
117	GO:0010468	regulation of gene expression	314 (34.89%)	2327 (28.45%)	5e-06	0.00033	g73;g198;g294;g496;g579;g580;g657;g719;g753;g789;g806;g873;g945;g955;g1008;g1107;g1217;g1221;g1278;g1292;g1365;g1398;g1462;g1464;g1499;g1500;g1691;g1717;g1752;g1761;g1877;g1881;g1889;g1890;g1911;g1938;g1948;g1991;g2013;g2028;g2067;g2206;g2249;g2270;g2318;g2376;g2473;g2661;g2679;g2781;g2864;g2929;g3094;g3125;g3183;g3208;g3281;g3343;g3356;g3375;g3384;g3393;g3396;g3407;g3410;g3411;g3422;g3427;g3428;…
118	GO:0010646	regulation of cell communication	206 (22.89%)	1423 (17.4%)	5e-06	0.00033	g63;g103;g496;g527;g563;g624;g710;g765;g789;g1192;g1217;g1221;g1380;g1398;g1495;g1600;g1691;g1845;g1890;g1903;g1935;g1948;g1991;g2013;g2028;g2249;g2270;g2295;g2364;g2388;g2670;g2674;g2707;g2733;g2742;g2763;g2865;g2882;g2967;g2980;g3090;g3117;g3281;g3344;g3375;g3384;g3396;g3422;g3429;g3445;g3447;g3455;g3456;g3627;g3701;g3800;g3831;g3882;g3898;g3902;g3909;g3938;g3945;g4226;g4301;g4415;g4545;g4552;g…
119	GO:0010467	gene expression	428 (47.56%)	3326 (40.67%)	6e-06	0.000368	g73;g198;g201;g294;g496;g497;g579;g580;g655;g657;g710;g719;g749;g753;g789;g806;g829;g873;g945;g955;g981;g1008;g1015;g1107;g1217;g1221;g1278;g1292;g1365;g1398;g1462;g1464;g1499;g1500;g1524;g1637;g1691;g1713;g1716;g1717;g1742;g1752;g1758;g1761;g1819;g1877;g1881;g1889;g1890;g1893;g1911;g1938;g1948;g1991;g2013;g2028;g2050;g2067;g2111;g2206;g2249;g2251;g2270;g2318;g2376;g2473;g2521;g2661;g2674;g2679;g…
120	GO:0006342	chromatin silencing	40 (4.44%)	177 (2.16%)	6e-06	0.000389	g198;g789;g1278;g1462;g1499;g1500;g2376;g2661;g3094;g3411;g3427;g3831;g4517;g4531;g4565;g6284;g6285;g6780;g7866;g8065;g8503;g8657;g8727;g8873;g9206;g9675;g9793;g10447;g10599;g3202;g6066;g1955;g3140;g3207;g4863;g5160;g6067;g7475;g8574;g8941
121	GO:0010558	negative regulation of macromolecule biosynthetic process	135 (15%)	862 (10.54%)	6e-06	0.000419	g73;g103;g198;g294;g496;g579;g580;g719;g789;g1217;g1221;g1278;g1462;g1464;g1499;g1500;g1691;g1890;g2028;g2067;g2376;g2661;g2781;g2929;g3094;g3310;g3356;g3375;g3393;g3407;g3411;g3427;g3486;g3696;g3831;g3882;g3945;g4067;g4138;g4374;g4433;g4517;g4531;g4545;g4557;g4565;g4842;g5356;g5393;g5467;g5485;g5626;g5752;g5763;g5953;g6025;g6128;g6170;g6284;g6285;g6295;g6621;g6670;g6766;g6780;g6800;g6840;g6842;g…
122	GO:0031123	RNA 3'-end processing	35 (3.89%)	147 (1.8%)	7e-06	0.000431	g873;g1464;g1752;g2111;g2521;g2781;g3343;g3356;g3482;g3945;g4897;g5113;g6029;g6289;g6670;g6924;g7877;g8638;g8732;g9218;g9612;g10226;g10255;g10264;g1955;g2319;g4994;g5674;g6204;g6751;g7159;g7160;g7940;g10464;g10537
123	GO:0065008	regulation of biological quality	269 (29.89%)	1960 (23.97%)	9e-06	0.000601	g63;g83;g103;g496;g527;g657;g699;g710;g719;g749;g765;g806;g929;g1008;g1107;g1192;g1221;g1335;g1398;g1464;g1495;g1588;g1631;g1637;g1713;g1716;g1717;g1758;g1761;g1845;g1878;g1881;g1903;g1938;g2004;g2013;g2028;g2295;g2364;g2368;g2388;g2623;g2625;g2670;g2679;g2693;g2733;g2763;g2864;g2882;g2929;g2967;g3094;g3117;g3312;g3339;g3343;g3344;g3377;g3384;g3410;g3411;g3422;g3428;g3445;g3478;g3511;g3529;g3627;…
124	GO:0006807	nitrogen compound metabolic process	643 (71.44%)	5321 (65.06%)	1e-05	0.000613	g41;g63;g73;g95;g99;g103;g175;g198;g201;g213;g294;g496;g497;g502;g522;g563;g579;g580;g624;g655;g657;g710;g719;g728;g749;g753;g765;g789;g807;g829;g873;g945;g955;g981;g1008;g1107;g1192;g1193;g1217;g1221;g1278;g1292;g1335;g1362;g1365;g1380;g1398;g1462;g1464;g1480;g1499;g1500;g1524;g1588;g1600;g1637;g1691;g1713;g1716;g1717;g1742;g1752;g1758;g1761;g1819;g1877;g1881;g1889;g1890;g1893;g1911;g1935;g1938;…
125	GO:0006897	endocytosis	63 (7%)	334 (4.08%)	1e-05	0.000634	g63;g103;g201;g384;g765;g771;g1217;g1398;g1631;g1794;g1965;g2206;g2364;g2670;g2980;g3344;g3429;g3445;g3725;g3875;g4205;g4374;g4989;g5387;g5485;g5650;g5651;g5730;g6093;g6470;g7290;g7809;g8229;g8381;g8496;g8766;g8778;g8985;g9167;g9173;g9779;g9820;g10112;g10246;g10447;g10536;g10650;g1255;g7227;g1256;g1718;g1987;g3894;g4739;g5168;g5335;g5399;g6204;g6308;g6415;g7939;g8941;g10537
126	GO:0009894	regulation of catabolic process	90 (10%)	528 (6.46%)	1e-05	0.000649	g63;g496;g580;g618;g765;g789;g1221;g1398;g1588;g1717;g1761;g2249;g2295;g2763;g2967;g2980;g3090;g3312;g3343;g3384;g3410;g3411;g3421;g3627;g3831;g3882;g3938;g3945;g4433;g4523;g4576;g4680;g4993;g5268;g5429;g5651;g5752;g5862;g6032;g6074;g6170;g6203;g6470;g6572;g6720;g6752;g6842;g6899;g7290;g7319;g7572;g7629;g7877;g8496;g8525;g8607;g8640;g9612;g9791;g9853;g9869;g10070;g10112;g10128;g10246;g10255;g1026…
127	GO:0043085	positive regulation of catalytic activity	93 (10.33%)	552 (6.75%)	1.2e-05	0.000741	g496;g710;g929;g1008;g1554;g1600;g1881;g1965;g1991;g2013;g2028;g2067;g2206;g2368;g2670;g2882;g2967;g3090;g3117;g3312;g3384;g3407;g3445;g3455;g3537;g3701;g3938;g3945;g3952;g4523;g4805;g4842;g5375;g5651;g6015;g6018;g6032;g6203;g6285;g6327;g6800;g6815;g6899;g6982;g7391;g7635;g7781;g7877;g8229;g8508;g8548;g8607;g8801;g9173;g9793;g9994;g10128;g10246;g10638;g10650;g1056;g1255;g1310;g3202;g5026;g7686;g8…
128	GO:0045814	negative regulation of gene expression, epigenetic	40 (4.44%)	182 (2.23%)	1.2e-05	0.000743	g198;g789;g1278;g1462;g1499;g1500;g2376;g2661;g3094;g3411;g3427;g3831;g4517;g4531;g4565;g6284;g6285;g6780;g7866;g8065;g8503;g8657;g8727;g8873;g9206;g9675;g9793;g10447;g10599;g3202;g6066;g1955;g3140;g3207;g4863;g5160;g6067;g7475;g8574;g8941
129	GO:0016236	macroautophagy	42 (4.67%)	195 (2.38%)	1.2e-05	0.00076	g63;g496;g615;g765;g1008;g1221;g2249;g2763;g2980;g3384;g3627;g4576;g4680;g4993;g5089;g5429;g6032;g6093;g6303;g6815;g6899;g6944;g7319;g7629;g8496;g8525;g8607;g8778;g10246;g10261;g10270;g10447;g3141;g10173;g1718;g2937;g4994;g5616;g6415;g6888;g7475;g8495
130	GO:0044763	single-organism cellular process	750 (83.33%)	6373 (77.93%)	1.3e-05	0.000767	g63;g69;g73;g83;g99;g103;g175;g198;g201;g213;g294;g308;g316;g384;g496;g502;g522;g527;g563;g579;g580;g587;g615;g618;g624;g657;g699;g710;g719;g728;g749;g753;g765;g771;g789;g806;g807;g829;g929;g932;g945;g981;g1008;g1015;g1088;g1107;g1192;g1193;g1217;g1221;g1278;g1292;g1335;g1362;g1365;g1380;g1398;g1462;g1464;g1480;g1493;g1495;g1499;g1500;g1554;g1588;g1600;g1631;g1637;g1691;g1713;g1716;g1717;g1742;g1…
131	GO:2000113	negative regulation of cellular macromolecule biosynthetic process	131 (14.56%)	843 (10.31%)	1.3e-05	0.000812	g73;g198;g294;g496;g579;g580;g719;g789;g1217;g1221;g1278;g1462;g1464;g1499;g1500;g1691;g1890;g2028;g2067;g2376;g2661;g2781;g2929;g3094;g3310;g3356;g3375;g3393;g3407;g3411;g3427;g3486;g3696;g3831;g3882;g3945;g4067;g4138;g4374;g4433;g4517;g4531;g4545;g4557;g4565;g4842;g5356;g5393;g5467;g5485;g5626;g5763;g5953;g6025;g6128;g6170;g6284;g6285;g6295;g6621;g6670;g6766;g6780;g6800;g6840;g6842;g6919;g6924;…
132	GO:0006974	cellular response to DNA damage stimulus	117 (13%)	735 (8.99%)	1.4e-05	0.000812	g201;g294;g496;g657;g728;g749;g1500;g1588;g1713;g1819;g1911;g1964;g2067;g2781;g2858;g2929;g3074;g3125;g3310;g3384;g3407;g3411;g3419;g3422;g3427;g3486;g3831;g3882;g3945;g4174;g4427;g4433;g4523;g4805;g4893;g5137;g5275;g5393;g5467;g5621;g5622;g5650;g5818;g6018;g6029;g6170;g6203;g6340;g6356;g6509;g6621;g6670;g6759;g6766;g6815;g6899;g7028;g7087;g7290;g7748;g7866;g7877;g8299;g8362;g8384;g8525;g8568;g86…
133	GO:0012501	programmed cell death	121 (13.44%)	768 (9.39%)	1.6e-05	0.00093	g103;g201;g294;g496;g753;g789;g945;g1008;g1015;g1362;g1480;g1588;g1890;g1948;g2013;g2028;g2067;g2295;g2670;g2781;g2882;g2929;g3384;g3445;g3456;g3701;g3831;g4517;g4545;g4576;g4680;g4733;g4738;g4805;g4893;g4993;g5025;g5356;g5608;g5651;g5673;g5747;g5752;g6018;g6032;g6093;g6098;g6284;g6340;g6759;g6776;g6800;g6840;g6842;g6899;g7087;g7319;g7635;g7877;g8081;g8503;g8508;g8607;g8657;g8801;g8972;g9779;g980…
134	GO:0048589	developmental growth	97 (10.78%)	587 (7.18%)	1.7e-05	0.001027	g63;g527;g563;g657;g710;g719;g765;g1192;g1221;g1335;g1398;g1717;g2013;g2364;g2707;g2781;g2929;g3117;g3384;g3422;g3898;g3909;g3938;g3945;g4374;g4545;g4601;g4792;g4893;g5251;g5356;g5485;g5651;g5862;g6018;g6032;g6093;g6122;g6170;g6273;g6303;g6327;g6470;g6759;g6775;g6815;g6842;g6899;g6924;g6979;g7028;g7319;g7635;g7866;g7877;g8226;g8365;g8384;g8390;g8548;g8640;g8657;g8801;g9011;g9548;g9675;g10006;g100…
135	GO:0061024	membrane organization	117 (13%)	739 (9.04%)	1.7e-05	0.001027	g69;g103;g201;g384;g615;g657;g765;g1107;g1493;g1554;g1588;g1716;g1794;g1877;g1965;g2004;g2028;g2249;g2364;g2388;g2623;g2693;g2980;g3312;g3339;g3411;g3445;g3455;g3478;g3725;g4205;g4226;g4576;g5089;g5126;g5132;g5203;g5356;g5375;g5554;g5621;g5622;g5651;g5730;g5747;g5752;g5984;g6007;g6032;g6093;g6295;g6303;g6470;g6523;g6621;g6681;g6752;g6813;g6944;g7391;g7629;g7705;g8196;g8229;g8381;g8496;g8525;g8548…
136	GO:0044093	positive regulation of molecular function	109 (12.11%)	678 (8.29%)	1.8e-05	0.001034	g496;g710;g929;g1008;g1554;g1600;g1881;g1965;g1991;g2013;g2028;g2067;g2206;g2270;g2368;g2670;g2733;g2882;g2967;g3090;g3117;g3312;g3356;g3384;g3407;g3445;g3455;g3537;g3701;g3882;g3938;g3945;g3952;g4523;g4805;g4842;g5356;g5375;g5651;g6015;g6018;g6032;g6203;g6285;g6327;g6771;g6800;g6815;g6899;g6982;g7028;g7391;g7635;g7781;g7877;g8229;g8508;g8548;g8607;g8801;g9173;g9793;g9805;g9994;g10128;g10246;g105…
137	GO:0051129	negative regulation of cellular component organization	72 (8%)	404 (4.94%)	1.8e-05	0.001049	g63;g103;g496;g618;g719;g789;g1398;g1462;g1464;g1499;g1500;g1965;g2013;g2206;g2929;g2980;g3260;g3422;g3537;g3725;g3945;g4433;g4531;g4993;g5132;g5651;g5730;g5862;g6032;g6074;g6284;g6572;g6670;g6780;g6800;g6842;g6919;g7319;g7877;g7918;g8065;g8362;g8365;g8657;g9206;g9612;g9820;g10070;g10226;g2854;g3203;g5026;g654;g1555;g1955;g2538;g3477;g4169;g4329;g4739;g4994;g7015;g7475;g7939;g7984;g8495;g8570;g85…
138	GO:0000278	mitotic cell cycle	127 (14.11%)	817 (9.99%)	1.8e-05	0.001049	g103;g201;g496;g522;g618;g749;g753;g789;g1192;g1278;g1462;g1493;g1713;g1716;g1742;g1758;g1794;g2067;g2247;g2249;g2670;g2781;g2882;g2929;g3335;g3343;g3375;g3384;g3407;g3453;g3456;g3478;g3537;g3701;g3800;g3831;g3945;g4738;g4805;g4842;g4897;g5132;g5393;g5554;g5621;g5622;g5651;g5730;g5752;g6007;g6029;g6170;g6203;g6284;g6285;g6303;g6327;g6340;g6379;g6572;g6759;g6842;g6899;g7283;g7576;g7635;g7781;g7866…
139	GO:0031329	regulation of cellular catabolic process	83 (9.22%)	484 (5.92%)	1.8e-05	0.001055	g63;g496;g580;g618;g765;g789;g1221;g1398;g1588;g1717;g1761;g2249;g2295;g2763;g2967;g2980;g3090;g3312;g3343;g3384;g3410;g3411;g3627;g3831;g3882;g3938;g3945;g4523;g4576;g4680;g4993;g5268;g5429;g5651;g5752;g5862;g6032;g6074;g6170;g6203;g6470;g6572;g6720;g6752;g6842;g6899;g7319;g7572;g7629;g7877;g8525;g8607;g8640;g9612;g9791;g9853;g9869;g10112;g10128;g10246;g10264;g10599;g1219;g1834;g3141;g8068;g1017…
140	GO:0009790	embryo development	151 (16.78%)	1006 (12.3%)	1.9e-05	0.001055	g103;g789;g1107;g1192;g1217;g1278;g1493;g1588;g1631;g1742;g1794;g1948;g1965;g1991;g2013;g2028;g2295;g2368;g2707;g2763;g2781;g2882;g2929;g3090;g3094;g3117;g3216;g3310;g3375;g3410;g3411;g3427;g3444;g3453;g3456;g3800;g3831;g3882;g3945;g4067;g4205;g4374;g4433;g4517;g4545;g4680;g4738;g4805;g4842;g5089;g5113;g5126;g5132;g5137;g5356;g5429;g5485;g5793;g5818;g6074;g6122;g6285;g6327;g6379;g6385;g6470;g6475…
141	GO:0098657	import into cell	55 (6.11%)	285 (3.48%)	1.9e-05	0.001055	g63;g103;g201;g384;g765;g771;g1217;g1398;g1794;g2206;g2364;g2980;g3344;g3429;g3445;g3725;g3886;g4205;g4374;g4473;g5387;g5730;g6093;g6470;g7809;g8229;g8381;g8496;g8766;g8778;g8985;g9167;g9173;g9779;g9820;g10112;g10246;g10447;g10536;g10650;g1255;g7227;g1256;g1718;g1987;g2698;g3894;g4739;g5168;g5335;g5399;g6204;g7939;g8941;g10537
142	GO:0044085	cellular component biogenesis	311 (34.56%)	2336 (28.56%)	1.9e-05	0.001083	g63;g73;g103;g201;g294;g527;g655;g719;g749;g765;g789;g807;g929;g945;g955;g1192;g1221;g1278;g1292;g1398;g1462;g1464;g1493;g1495;g1499;g1500;g1524;g1588;g1631;g1637;g1742;g1752;g1758;g1819;g1845;g1877;g1893;g1938;g2004;g2013;g2206;g2295;g2364;g2368;g2534;g2625;g2661;g2670;g2742;g2861;g2882;g2976;g2980;g3094;g3117;g3183;g3208;g3260;g3312;g3335;g3343;g3345;g3356;g3384;g3407;g3419;g3421;g3444;g3453;g3…
143	GO:0023051	regulation of signaling	198 (22%)	1387 (16.96%)	2e-05	0.001126	g103;g496;g509;g527;g563;g624;g710;g765;g789;g1192;g1217;g1380;g1398;g1495;g1600;g1691;g1845;g1890;g1903;g1935;g1948;g1991;g2013;g2028;g2249;g2270;g2295;g2364;g2388;g2670;g2674;g2707;g2733;g2865;g2882;g2967;g3090;g3117;g3281;g3344;g3375;g3384;g3396;g3422;g3429;g3445;g3447;g3455;g3456;g3627;g3701;g3800;g3831;g3882;g3898;g3902;g3909;g3938;g3945;g4226;g4301;g4415;g4545;g4552;g4576;g4584;g4680;g4805;…
144	GO:0009890	negative regulation of biosynthetic process	138 (15.33%)	905 (11.07%)	2.1e-05	0.001132	g73;g103;g198;g294;g496;g579;g580;g719;g789;g1217;g1221;g1278;g1462;g1464;g1499;g1500;g1691;g1890;g2028;g2067;g2376;g2661;g2781;g2929;g3094;g3310;g3356;g3375;g3393;g3407;g3411;g3427;g3486;g3696;g3831;g3882;g3945;g4067;g4138;g4374;g4433;g4517;g4531;g4545;g4557;g4565;g4842;g5356;g5393;g5467;g5485;g5626;g5752;g5763;g5953;g6025;g6128;g6170;g6284;g6285;g6295;g6621;g6670;g6681;g6766;g6780;g6800;g6840;g…
145	GO:0080134	regulation of response to stress	103 (11.44%)	635 (7.76%)	2.1e-05	0.001153	g63;g73;g294;g496;g765;g1008;g1192;g1221;g1588;g1600;g1890;g1935;g2028;g2249;g2270;g2742;g2763;g2865;g2980;g3117;g3125;g3384;g3407;g3422;g3456;g3627;g3701;g3800;g3831;g3938;g4226;g4415;g4433;g4545;g4680;g4993;g5356;g5393;g5429;g5651;g5763;g6018;g6032;g6098;g6681;g6759;g6800;g6899;g7087;g7319;g7629;g7748;g7877;g8299;g8362;g8384;g8657;g8727;g9021;g9254;g9820;g9994;g10246;g10447;g1219;g3141;g5563;g7…
146	GO:0051603	proteolysis involved in cellular protein catabolic process	85 (9.44%)	501 (6.13%)	2.2e-05	0.0012	g496;g502;g618;g657;g789;g1193;g1217;g1335;g1398;g1500;g1588;g1964;g2251;g2473;g2697;g2781;g3090;g3384;g3422;g3455;g3831;g3882;g4226;g4374;g4415;g4433;g4517;g4523;g4545;g4552;g4680;g4733;g5132;g5275;g5650;g5651;g6098;g6170;g6203;g6572;g6752;g6759;g6788;g6815;g7028;g7290;g7319;g7748;g7781;g7878;g8226;g8496;g8525;g8607;g8640;g8822;g8972;g9853;g9869;g10112;g10270;g10391;g10599;g1219;g1834;g594;g760;…
147	GO:0018193	peptidyl-amino acid modification	91 (10.11%)	546 (6.68%)	2.3e-05	0.001237	g63;g201;g496;g563;g829;g1380;g1588;g2067;g2249;g2376;g2670;g2929;g3384;g3800;g3875;g3882;g3987;g4517;g4545;g4859;g4933;g5027;g5356;g5627;g5953;g6018;g6029;g6032;g6170;g6289;g6295;g6327;g6385;g6422;g6759;g6899;g6919;g7283;g7319;g7391;g7687;g7781;g7877;g8299;g8362;g8508;g8607;g8657;g8727;g8735;g8801;g9206;g9254;g9612;g9675;g9805;g9820;g10009;g10070;g10112;g10447;g10553;g10564;g5026;g5563;g6386;g65…
148	GO:0010608	posttranscriptional regulation of gene expression	72 (8%)	407 (4.98%)	2.4e-05	0.001262	g294;g719;g1107;g1292;g1717;g1761;g2067;g2661;g2864;g3125;g3208;g3343;g3356;g3384;g3410;g3411;g3428;g3938;g3945;g4067;g4340;g4545;g4933;g4995;g5113;g5137;g5268;g5752;g5763;g5953;g6025;g6029;g6074;g6670;g6759;g6771;g6842;g6899;g6924;g6990;g8384;g8576;g8764;g8868;g8873;g9231;g9612;g9791;g9793;g10128;g10226;g10264;g10378;g10553;g10601;g3203;g3342;g8068;g2319;g3423;g3901;g4412;g5392;g5674;g5764;g6204…
149	GO:0006281	DNA repair	98 (10.89%)	600 (7.34%)	2.6e-05	0.001359	g201;g294;g657;g728;g749;g1500;g1588;g1713;g1911;g1964;g2858;g2929;g3074;g3125;g3310;g3384;g3407;g3411;g3419;g3422;g3427;g3486;g3831;g4174;g4427;g4433;g4523;g4805;g4893;g5137;g5275;g5467;g5621;g5622;g5650;g5818;g6018;g6170;g6203;g6340;g6356;g6509;g6621;g6670;g6759;g6815;g7028;g7290;g7748;g7866;g7877;g8299;g8362;g8384;g8525;g8568;g8607;g8654;g8657;g8727;g8873;g9011;g9221;g9230;g9254;g9793;g10112;g…
150	GO:0051640	organelle localization	84 (9.33%)	496 (6.07%)	2.6e-05	0.001401	g63;g103;g201;g618;g749;g765;g1192;g1554;g1600;g1716;g1742;g1758;g1794;g1878;g2364;g2714;g2763;g2882;g2929;g3094;g3312;g3335;g3339;g3375;g3427;g3453;g3478;g3945;g4374;g4584;g4641;g4738;g5089;g5554;g5621;g5622;g5651;g5752;g6007;g6032;g6093;g6170;g6284;g6379;g6572;g6815;g7319;g7781;g7809;g8299;g8496;g8525;g8548;g8607;g8638;g8778;g8985;g9113;g9548;g9853;g10112;g10226;g10447;g10450;g10599;g1255;g4974…
151	GO:0006401	RNA catabolic process	53 (5.89%)	275 (3.36%)	2.8e-05	0.001451	g294;g719;g873;g1464;g1713;g1761;g1877;g2376;g3117;g3220;g3343;g3356;g3384;g3410;g3411;g3886;g3938;g3945;g4067;g4993;g5113;g5203;g5268;g5752;g5763;g6074;g6842;g6899;g8299;g8732;g9221;g9612;g9791;g10052;g10128;g10226;g10264;g10553;g3342;g8068;g1218;g2853;g4478;g5674;g6042;g6204;g6923;g7728;g8064;g8080;g8767;g10462;g10537
152	GO:0006468	protein phosphorylation	113 (12.56%)	716 (8.76%)	2.9e-05	0.001491	g63;g99;g496;g514;g527;g563;g789;g1008;g1192;g1278;g1362;g1380;g1600;g1637;g1881;g1890;g1935;g2013;g2028;g2067;g2368;g2670;g2865;g2882;g3117;g3281;g3377;g3384;g3407;g3456;g3537;g3701;g3800;g3882;g3938;g3952;g4301;g4680;g4805;g4897;g4989;g5268;g5651;g5747;g5793;g5831;g6015;g6018;g6029;g6032;g6170;g6285;g6289;g6327;g6379;g6899;g6982;g7319;g7635;g7877;g8037;g8117;g8233;g8299;g8362;g8496;g8657;g8732;…
153	GO:0051234	establishment of localization	376 (41.78%)	2913 (35.62%)	3e-05	0.00154	g63;g69;g103;g201;g294;g384;g496;g509;g618;g657;g699;g749;g757;g765;g771;g806;g829;g932;g955;g981;g1008;g1015;g1107;g1192;g1217;g1335;g1398;g1495;g1500;g1554;g1588;g1600;g1631;g1691;g1716;g1752;g1758;g1761;g1794;g1819;g1845;g1877;g1878;g1881;g1903;g1935;g1938;g1965;g1971;g2004;g2013;g2067;g2111;g2136;g2206;g2249;g2270;g2295;g2364;g2368;g2388;g2623;g2670;g2693;g2711;g2742;g2763;g2882;g2929;g2967;g…
154	GO:0043631	RNA polyadenylation	17 (1.89%)	53 (0.65%)	3e-05	0.001562	g873;g1464;g1752;g2111;g2521;g2781;g3410;g3482;g6289;g7877;g8732;g9218;g10226;g7159;g7160;g7940;g10537
155	GO:0044764	multi-organism cellular process	75 (8.33%)	432 (5.28%)	3.1e-05	0.001584	g103;g175;g201;g294;g496;g749;g789;g873;g955;g1398;g1554;g1691;g1890;g2711;g2714;g2980;g3281;g3335;g3356;g3427;g3453;g3886;g3945;g4427;g5027;g5089;g5429;g5651;g5752;g6029;g6303;g6521;g6523;g6565;g6621;g6670;g6752;g6759;g6894;g6899;g7629;g7781;g8226;g8607;g8640;g8764;g8778;g9021;g9033;g9167;g9206;g9254;g9793;g10564;g10599;g588;g3451;g6359;g591;g760;g1194;g1718;g1985;g2269;g2539;g3621;g4807;g5335;g…
156	GO:0022607	cellular component assembly	267 (29.67%)	1973 (24.13%)	3.2e-05	0.001613	g63;g73;g103;g201;g294;g527;g655;g719;g749;g765;g789;g945;g955;g1192;g1221;g1278;g1398;g1462;g1493;g1495;g1499;g1500;g1524;g1588;g1631;g1637;g1742;g1752;g1758;g1845;g2004;g2013;g2206;g2295;g2364;g2368;g2534;g2661;g2670;g2861;g2882;g2976;g2980;g3094;g3117;g3208;g3260;g3312;g3335;g3356;g3384;g3407;g3419;g3421;g3444;g3453;g3455;g3478;g3486;g3696;g3725;g3853;g3882;g3909;g3945;g3987;g4067;g4174;g4226;…
157	GO:0006915	apoptotic process	110 (12.22%)	695 (8.5%)	3.2e-05	0.001644	g201;g294;g496;g753;g789;g945;g1015;g1362;g1588;g1890;g2013;g2028;g2067;g2295;g2670;g2781;g2929;g3384;g3445;g3456;g3701;g3831;g4517;g4545;g4680;g4733;g4738;g4805;g4893;g4993;g5025;g5356;g5608;g5651;g5673;g5747;g5752;g6018;g6032;g6093;g6098;g6284;g6340;g6759;g6776;g6800;g6840;g6842;g6899;g7087;g7635;g7877;g8081;g8503;g8508;g8607;g8657;g8801;g8972;g9805;g10006;g10070;g10128;g10255;g10391;g10599;g52…
158	GO:0000280	nuclear division	88 (9.78%)	529 (6.47%)	3.4e-05	0.001703	g103;g496;g522;g618;g728;g749;g789;g1192;g1278;g1493;g1588;g1716;g1742;g1758;g1889;g2295;g2388;g2534;g2882;g2929;g3335;g3375;g3410;g3422;g3453;g3456;g3537;g3945;g4174;g4738;g4805;g5132;g5621;g5622;g5650;g6170;g6203;g6284;g6327;g6379;g6572;g6759;g6899;g6919;g7781;g7866;g7877;g8008;g8065;g8081;g8362;g8638;g8654;g8657;g9167;g9206;g9283;g9548;g9612;g9793;g9853;g10100;g588;g1219;g2854;g3202;g199;g1170…
159	GO:0010604	positive regulation of macromolecule metabolic process	203 (22.56%)	1440 (17.61%)	3.5e-05	0.001749	g198;g496;g580;g657;g955;g1008;g1217;g1221;g1278;g1335;g1365;g1398;g1462;g1499;g1500;g1588;g1600;g1691;g1717;g1881;g1938;g1948;g2028;g2067;g2206;g2249;g2270;g2376;g2670;g2929;g3090;g3117;g3183;g3208;g3281;g3356;g3384;g3396;g3407;g3411;g3422;g3427;g3455;g3482;g3537;g3696;g3701;g3875;g3882;g3898;g3902;g3938;g3945;g3952;g4340;g4366;g4374;g4433;g4523;g4531;g4665;g4805;g4842;g5340;g5356;g5398;g5400;g5…
160	GO:0043632	modification-dependent macromolecule catabolic process	83 (9.22%)	493 (6.03%)	3.7e-05	0.001831	g496;g502;g618;g657;g789;g1193;g1217;g1335;g1398;g1464;g1500;g1588;g1964;g2251;g2473;g2697;g2781;g3090;g3343;g3422;g3455;g3831;g3882;g4226;g4374;g4415;g4433;g4517;g4545;g4552;g4680;g4733;g5132;g5275;g5650;g5651;g6098;g6170;g6203;g6572;g6752;g6759;g6788;g6815;g7028;g7290;g7319;g7748;g7781;g7878;g8226;g8496;g8525;g8607;g8822;g8972;g9853;g9869;g10112;g10270;g10391;g10599;g1219;g1834;g594;g760;g1194;…
161	GO:0009987	cellular process	851 (94.56%)	7457 (91.18%)	4.3e-05	0.002104	g41;g63;g69;g73;g83;g95;g99;g103;g175;g198;g201;g213;g294;g308;g316;g384;g496;g497;g502;g509;g514;g522;g527;g563;g579;g580;g587;g615;g618;g624;g655;g657;g699;g710;g719;g728;g749;g753;g765;g771;g789;g806;g807;g829;g873;g929;g932;g945;g955;g981;g1008;g1015;g1049;g1088;g1107;g1192;g1193;g1217;g1221;g1278;g1292;g1335;g1362;g1365;g1380;g1398;g1462;g1464;g1480;g1493;g1495;g1499;g1500;g1524;g1554;g1588;…
162	GO:0031327	negative regulation of cellular biosynthetic process	135 (15%)	895 (10.94%)	4.4e-05	0.002161	g73;g103;g198;g294;g496;g579;g580;g719;g789;g1217;g1221;g1278;g1462;g1464;g1499;g1500;g1691;g1890;g2028;g2067;g2376;g2661;g2781;g2929;g3094;g3310;g3356;g3375;g3393;g3407;g3411;g3427;g3486;g3696;g3831;g3882;g3945;g4067;g4138;g4374;g4433;g4517;g4531;g4545;g4557;g4565;g4842;g5356;g5393;g5467;g5485;g5626;g5752;g5763;g5953;g6025;g6128;g6170;g6284;g6285;g6295;g6621;g6670;g6766;g6780;g6800;g6840;g6842;g…
163	GO:0065009	regulation of molecular function	171 (19%)	1184 (14.48%)	4.6e-05	0.002224	g496;g527;g618;g624;g710;g789;g929;g1008;g1217;g1221;g1380;g1554;g1600;g1881;g1935;g1965;g1991;g2013;g2028;g2067;g2206;g2249;g2270;g2295;g2368;g2388;g2670;g2733;g2781;g2865;g2882;g2967;g3090;g3117;g3312;g3343;g3356;g3384;g3407;g3429;g3445;g3455;g3482;g3537;g3701;g3800;g3831;g3882;g3938;g3945;g3952;g3987;g4433;g4523;g4552;g4557;g4680;g4805;g4842;g5356;g5375;g5651;g5747;g5752;g5862;g6015;g6018;g603…
164	GO:0006402	mRNA catabolic process	47 (5.22%)	239 (2.92%)	4.6e-05	0.002246	g294;g719;g873;g1464;g1761;g1877;g3117;g3220;g3343;g3356;g3384;g3410;g3411;g3938;g3945;g4067;g4993;g5113;g5203;g5268;g5752;g6074;g6842;g6899;g8299;g8732;g9221;g9612;g9791;g10052;g10128;g10226;g10264;g10553;g3342;g1218;g2853;g4478;g5674;g6042;g6923;g7728;g8064;g8080;g8767;g10462;g10537
165	GO:0044257	cellular protein catabolic process	87 (9.67%)	526 (6.43%)	4.7e-05	0.002251	g496;g502;g618;g657;g789;g1193;g1217;g1335;g1398;g1500;g1588;g1964;g2251;g2473;g2697;g2781;g2967;g3090;g3384;g3422;g3455;g3831;g3882;g4226;g4374;g4415;g4433;g4517;g4523;g4545;g4552;g4680;g4733;g5132;g5275;g5650;g5651;g6098;g6170;g6203;g6470;g6572;g6752;g6759;g6788;g6815;g7028;g7290;g7319;g7748;g7781;g7878;g8226;g8496;g8525;g8607;g8640;g8822;g8972;g9853;g9869;g10112;g10270;g10391;g10599;g1219;g183…
166	GO:0010941	regulation of cell death	107 (11.89%)	679 (8.3%)	5.1e-05	0.002415	g63;g201;g294;g496;g753;g765;g789;g945;g1015;g1480;g1588;g1890;g1948;g2013;g2028;g2067;g2295;g2670;g2882;g3090;g3260;g3384;g3456;g3701;g3831;g4417;g4517;g4545;g4680;g4733;g4738;g4805;g4893;g4993;g5275;g5356;g5651;g5673;g5752;g6032;g6093;g6098;g6340;g6523;g6752;g6755;g6759;g6776;g6800;g6840;g6842;g7028;g7087;g7319;g7635;g7877;g8081;g8503;g8508;g8607;g8801;g8972;g9805;g10006;g10070;g10226;g10255;g1…
167	GO:0048583	regulation of response to stimulus	230 (25.56%)	1673 (20.46%)	5.1e-05	0.002415	g63;g73;g103;g201;g294;g496;g527;g563;g624;g710;g765;g789;g1008;g1192;g1217;g1221;g1380;g1398;g1588;g1600;g1631;g1691;g1845;g1878;g1890;g1935;g1948;g1991;g2013;g2028;g2249;g2270;g2295;g2388;g2670;g2674;g2707;g2733;g2742;g2763;g2865;g2882;g2967;g2980;g3090;g3117;g3125;g3281;g3312;g3339;g3344;g3375;g3384;g3396;g3407;g3422;g3429;g3445;g3447;g3455;g3456;g3627;g3701;g3800;g3831;g3882;g3898;g3909;g3938…
168	GO:0051726	regulation of cell cycle	109 (12.11%)	695 (8.5%)	5.3e-05	0.002485	g103;g496;g618;g749;g753;g789;g1008;g1192;g1493;g1717;g1758;g1881;g1964;g2067;g2247;g2882;g2929;g3335;g3375;g3384;g3407;g3410;g3453;g3456;g3537;g3701;g3831;g3945;g4680;g4738;g4805;g4897;g5268;g5356;g5393;g5485;g5651;g5752;g6029;g6170;g6203;g6284;g6285;g6422;g6572;g6780;g6839;g6842;g6899;g6919;g7087;g7635;g7781;g7866;g7877;g8065;g8362;g8496;g8638;g8657;g8972;g9113;g9173;g9206;g9254;g9612;g9791;g98…
169	GO:0006378	mRNA polyadenylation	16 (1.78%)	50 (0.61%)	5.3e-05	0.002498	g873;g1464;g1752;g2111;g2521;g2781;g3482;g6289;g7877;g8732;g9218;g10226;g7159;g7160;g7940;g10537
170	GO:0045324	late endosome to vacuole transport	15 (1.67%)	45 (0.55%)	5.3e-05	0.002498	g69;g1008;g1845;g3455;g4205;g5089;g6813;g7290;g8496;g8525;g8778;g9198;g10246;g3621;g5616
171	GO:0090304	nucleic acid metabolic process	412 (45.78%)	3249 (39.73%)	5.4e-05	0.002504	g41;g73;g198;g201;g294;g496;g497;g579;g580;g657;g710;g719;g728;g749;g753;g789;g873;g945;g955;g1008;g1217;g1221;g1278;g1292;g1365;g1398;g1462;g1464;g1499;g1500;g1524;g1588;g1691;g1713;g1752;g1758;g1761;g1819;g1877;g1881;g1889;g1890;g1911;g1938;g1948;g1964;g1991;g2013;g2028;g2050;g2067;g2111;g2206;g2249;g2251;g2270;g2318;g2376;g2473;g2521;g2661;g2670;g2679;g2742;g2781;g2858;g2864;g2929;g3074;g3094;…
172	GO:0045934	negative regulation of nucleobase-containing compound metabolic process	126 (14%)	828 (10.12%)	5.5e-05	0.002525	g73;g198;g496;g579;g580;g728;g789;g1217;g1221;g1278;g1462;g1464;g1499;g1500;g1691;g1890;g2028;g2376;g2661;g2781;g2929;g3094;g3310;g3375;g3384;g3393;g3407;g3410;g3411;g3422;g3427;g3486;g3696;g3831;g3882;g3945;g4067;g4138;g4374;g4433;g4517;g4531;g4545;g4557;g4565;g4842;g5275;g5356;g5393;g5467;g5485;g5626;g5752;g6074;g6128;g6170;g6284;g6285;g6621;g6766;g6780;g6800;g6840;g6842;g6899;g6919;g7283;g7290…
173	GO:1901575	organic substance catabolic process	206 (22.89%)	1476 (18.05%)	5.7e-05	0.002629	g294;g496;g502;g618;g657;g719;g765;g789;g873;g1008;g1088;g1193;g1217;g1335;g1398;g1464;g1500;g1588;g1713;g1761;g1877;g1964;g2025;g2251;g2376;g2473;g2697;g2781;g2967;g2980;g3090;g3117;g3135;g3220;g3343;g3356;g3384;g3410;g3411;g3421;g3422;g3455;g3831;g3882;g3886;g3938;g3945;g4067;g4145;g4226;g4374;g4415;g4433;g4517;g4523;g4545;g4552;g4576;g4592;g4680;g4733;g4844;g4850;g4993;g5113;g5118;g5132;g5203;…
174	GO:0031124	mRNA 3'-end processing	26 (2.89%)	106 (1.3%)	5.8e-05	0.002666	g873;g1464;g1752;g2111;g2521;g2781;g3356;g3482;g3945;g5113;g6029;g6289;g6670;g6924;g7877;g8732;g9218;g9612;g10226;g10255;g10264;g1955;g7159;g7160;g7940;g10537
175	GO:0031503	protein complex localization	42 (4.67%)	208 (2.54%)	6.2e-05	0.002801	g765;g1015;g1761;g2004;g2111;g3343;g3356;g3411;g3427;g3453;g3482;g4067;g4523;g5113;g5275;g5429;g5554;g5621;g5622;g5752;g6074;g6670;g6924;g6990;g7705;g7781;g8362;g8607;g8732;g9113;g588;g6359;g7979;g1291;g1985;g4807;g4829;g5620;g6416;g6888;g7015;g7940
176	GO:0016071	mRNA metabolic process	105 (11.67%)	667 (8.16%)	6.3e-05	0.002801	g294;g719;g753;g873;g945;g955;g1464;g1524;g1752;g1761;g1877;g2050;g2111;g2521;g2661;g2781;g3117;g3125;g3220;g3281;g3335;g3343;g3356;g3384;g3410;g3411;g3421;g3456;g3482;g3938;g3945;g3987;g4067;g4138;g4204;g4427;g4696;g4993;g5113;g5137;g5139;g5203;g5268;g5626;g5752;g5818;g6029;g6074;g6289;g6670;g6842;g6899;g6924;g7304;g7308;g7810;g7877;g8007;g8233;g8299;g8384;g8732;g8873;g9218;g9221;g9612;g9791;g10…
177	GO:0045927	positive regulation of growth	46 (5.11%)	235 (2.87%)	6.3e-05	0.002801	g527;g765;g1499;g1717;g2013;g2707;g3117;g3356;g3384;g3627;g3831;g3938;g4415;g5356;g6032;g6122;g6470;g6815;g6842;g6899;g7635;g7877;g7949;g7951;g8365;g8801;g9011;g9254;g9548;g10006;g10052;g10070;g10447;g5563;g1337;g1955;g3311;g3423;g3477;g3746;g4169;g4829;g5674;g7939;g8574;g10145
178	GO:0030163	protein catabolic process	94 (10.44%)	583 (7.13%)	6.3e-05	0.002801	g496;g502;g618;g657;g789;g1193;g1217;g1335;g1398;g1500;g1588;g1964;g2251;g2473;g2697;g2781;g2967;g2980;g3090;g3384;g3421;g3422;g3455;g3831;g3882;g4226;g4374;g4415;g4433;g4517;g4523;g4545;g4552;g4680;g4733;g4844;g5132;g5275;g5650;g5651;g6098;g6170;g6203;g6295;g6470;g6572;g6752;g6759;g6788;g6815;g7028;g7290;g7319;g7748;g7781;g7878;g8226;g8496;g8525;g8607;g8640;g8822;g8972;g9853;g9869;g10070;g10112;…
179	GO:0042981	regulation of apoptotic process	90 (10%)	554 (6.77%)	6.8e-05	0.003035	g201;g294;g496;g753;g789;g945;g1015;g1588;g1890;g2013;g2028;g2067;g2670;g3384;g3456;g3701;g3831;g4517;g4545;g4680;g4733;g4738;g4805;g4893;g4993;g5356;g5651;g5673;g5752;g6032;g6093;g6098;g6340;g6759;g6776;g6800;g6840;g6842;g7087;g7635;g7877;g8081;g8503;g8508;g8607;g8801;g8972;g9805;g10006;g10070;g10255;g10391;g10599;g526;g588;g1310;g3141;g5026;g5563;g7686;g654;g760;g1309;g1849;g1902;g1955;g2248;g2…
180	GO:0051247	positive regulation of protein metabolic process	103 (11.44%)	654 (8%)	7.3e-05	0.003202	g496;g1278;g1335;g1398;g1588;g1600;g1717;g1881;g2028;g2067;g2670;g3090;g3117;g3208;g3384;g3455;g3482;g3537;g3701;g3882;g3938;g3952;g4340;g4433;g4523;g4805;g4842;g5356;g5651;g6018;g6029;g6032;g6170;g6203;g6285;g6295;g6327;g6470;g6681;g6759;g6771;g6899;g6919;g6982;g7283;g7290;g7319;g7635;g7877;g8496;g8508;g8525;g8607;g8640;g8727;g8801;g9612;g9675;g9805;g9853;g9869;g9994;g10070;g10112;g10128;g10255;…
181	GO:1903649	regulation of cytoplasmic transport	36 (4%)	170 (2.08%)	7.4e-05	0.003255	g496;g749;g1752;g1878;g2013;g2763;g3144;g3312;g3422;g3453;g3455;g4205;g4301;g4805;g5356;g5375;g5651;g5752;g6295;g6572;g6670;g6899;g7290;g7781;g8525;g8732;g9218;g10070;g10255;g10270;g588;g654;g1985;g3408;g4807;g10269
182	GO:0051052	regulation of DNA metabolic process	54 (6%)	292 (3.57%)	7.5e-05	0.003259	g198;g496;g728;g1464;g1761;g2781;g2929;g3310;g3407;g3411;g3422;g3486;g3537;g4374;g4433;g5275;g5356;g5467;g6074;g6170;g6295;g6621;g6842;g6899;g6919;g7748;g7877;g8065;g8299;g8362;g8607;g8657;g8727;g9206;g9254;g9793;g10128;g10447;g10599;g3202;g5563;g8068;g654;g3207;g4739;g5794;g6204;g6754;g7475;g8567;g8941;g10145;g10537;g10649
183	GO:0010647	positive regulation of cell communication	105 (11.67%)	670 (8.19%)	7.5e-05	0.003259	g103;g496;g527;g624;g710;g765;g789;g1217;g1398;g1495;g1600;g1691;g1948;g2013;g2249;g2295;g2707;g2742;g2763;g2967;g2980;g3117;g3281;g3384;g3422;g3455;g3456;g3627;g3701;g3831;g3882;g3902;g3938;g4415;g4842;g4989;g5429;g5651;g5953;g6015;g6018;g6032;g6098;g6170;g6295;g6327;g6759;g6815;g6899;g6982;g7315;g7319;g7809;g7877;g7949;g7951;g8362;g8365;g8496;g8548;g8607;g8732;g8778;g8801;g9254;g9675;g9805;g986…
184	GO:0006895	Golgi to endosome transport	9 (1%)	19 (0.23%)	7.5e-05	0.003259	g103;g3725;g4777;g5089;g5971;g8525;g8778;g10650;g8738
185	GO:0010556	regulation of macromolecule biosynthetic process	283 (31.44%)	2133 (26.08%)	7.8e-05	0.003334	g73;g103;g198;g294;g496;g579;g580;g719;g753;g789;g955;g1008;g1107;g1217;g1221;g1278;g1292;g1365;g1398;g1462;g1464;g1499;g1500;g1691;g1717;g1761;g1881;g1890;g1911;g1948;g1991;g2028;g2067;g2206;g2249;g2270;g2318;g2376;g2473;g2661;g2679;g2781;g2864;g2929;g3094;g3183;g3208;g3310;g3356;g3375;g3384;g3393;g3396;g3407;g3411;g3427;g3428;g3447;g3456;g3486;g3537;g3696;g3831;g3875;g3882;g3898;g3902;g3914;g39…
186	GO:1902578	single-organism localization	355 (39.44%)	2757 (33.71%)	7.8e-05	0.003334	g63;g69;g103;g201;g384;g496;g509;g657;g699;g749;g765;g806;g829;g932;g981;g1008;g1015;g1107;g1192;g1217;g1335;g1398;g1493;g1495;g1500;g1554;g1588;g1600;g1691;g1716;g1742;g1761;g1794;g1819;g1845;g1877;g1878;g1881;g1903;g1935;g1938;g1965;g1971;g2004;g2013;g2028;g2111;g2136;g2206;g2249;g2270;g2295;g2364;g2368;g2388;g2623;g2670;g2693;g2711;g2742;g2763;g2882;g2929;g2967;g2980;g3094;g3144;g3216;g3260;g3…
187	GO:0043067	regulation of programmed cell death	95 (10.56%)	594 (7.26%)	7.8e-05	0.003334	g201;g294;g496;g753;g789;g945;g1015;g1480;g1588;g1890;g1948;g2013;g2028;g2067;g2670;g2882;g3384;g3456;g3701;g3831;g4517;g4545;g4680;g4733;g4738;g4805;g4893;g4993;g5356;g5651;g5673;g5752;g6032;g6093;g6098;g6340;g6759;g6776;g6800;g6840;g6842;g7087;g7319;g7635;g7877;g8081;g8503;g8508;g8607;g8801;g8972;g9805;g10006;g10070;g10226;g10255;g10391;g10599;g526;g588;g1310;g3141;g5026;g5563;g7686;g654;g760;g…
188	GO:0032200	telomere organization	27 (3%)	114 (1.39%)	8.1e-05	0.003434	g1464;g1713;g1761;g2679;g2929;g3411;g6074;g6170;g6842;g8299;g8362;g8657;g8727;g9793;g10128;g10599;g1255;g5563;g8068;g654;g1256;g3885;g4793;g6204;g8574;g10537;g10649
189	GO:0048232	male gamete generation	63 (7%)	357 (4.37%)	8.3e-05	0.00347	g103;g294;g749;g784;g789;g1278;g1493;g1588;g1716;g1742;g1758;g1889;g2388;g2929;g3335;g3422;g3511;g3886;g3938;g4174;g4523;g4665;g4680;g5027;g5137;g5275;g5429;g5554;g5621;g5622;g6284;g6759;g6780;g6842;g7877;g8226;g8638;g8657;g8985;g9167;g9612;g10070;g10226;g10255;g588;g1288;g1170;g1287;g1888;g1902;g4481;g5620;g6031;g6378;g6754;g6770;g6888;g8430;g8574;g9022;g9203;g9854;g10269
190	GO:0019941	modification-dependent protein catabolic process	79 (8.78%)	475 (5.81%)	8.7e-05	0.003656	g496;g502;g618;g657;g789;g1193;g1217;g1335;g1398;g1500;g1588;g1964;g2251;g2473;g2697;g2781;g3090;g3422;g3455;g3831;g3882;g4226;g4374;g4415;g4433;g4517;g4545;g4552;g4680;g4733;g5132;g5275;g5650;g5651;g6098;g6170;g6203;g6572;g6752;g6759;g6788;g6815;g7028;g7290;g7319;g7748;g7781;g7878;g8226;g8496;g8525;g8607;g8822;g8972;g9853;g9869;g10112;g10270;g10391;g10599;g1219;g1834;g594;g760;g1194;g1226;g1835;…
191	GO:0080135	regulation of cellular response to stress	74 (8.22%)	438 (5.36%)	8.8e-05	0.003656	g63;g496;g765;g1221;g1588;g1600;g1890;g2249;g2270;g2742;g2763;g2865;g2980;g3117;g3384;g3407;g3422;g3627;g3701;g3800;g3831;g3938;g4433;g4545;g4680;g4993;g5393;g5429;g5651;g6018;g6032;g6681;g6800;g6899;g7087;g7319;g7629;g7748;g7877;g8299;g8362;g8657;g8727;g9820;g9994;g10447;g3141;g5563;g7686;g10173;g654;g760;g1194;g1718;g2698;g2937;g3477;g4169;g4329;g4739;g4994;g5785;g5794;g6375;g6754;g7475;g7939;g…
192	GO:2000112	regulation of cellular macromolecule biosynthetic process	279 (31%)	2103 (25.72%)	9.1e-05	0.00376	g73;g198;g294;g496;g579;g580;g719;g753;g789;g955;g1008;g1107;g1217;g1221;g1278;g1292;g1365;g1398;g1462;g1464;g1499;g1500;g1691;g1717;g1761;g1881;g1890;g1911;g1948;g1991;g2028;g2067;g2206;g2249;g2270;g2318;g2376;g2473;g2661;g2679;g2781;g2864;g2929;g3094;g3183;g3208;g3310;g3356;g3375;g3384;g3393;g3396;g3407;g3411;g3427;g3428;g3447;g3456;g3486;g3537;g3696;g3831;g3875;g3882;g3898;g3902;g3914;g3945;g3…
193	GO:0032483	regulation of Rab protein signal transduction	7 (0.78%)	12 (0.15%)	9.2e-05	0.003782	g2249;g2967;g3429;g5375;g5862;g6982;g8229
194	GO:0009653	anatomical structure morphogenesis	261 (29%)	1950 (23.84%)	9.3e-05	0.0038	g63;g103;g201;g294;g496;g527;g563;g618;g624;g655;g657;g710;g749;g789;g807;g929;g1008;g1015;g1107;g1192;g1221;g1278;g1335;g1398;g1462;g1480;g1493;g1495;g1554;g1631;g1637;g1691;g1717;g1758;g1845;g1935;g1948;g1965;g1991;g2013;g2206;g2295;g2364;g2368;g2388;g2670;g2707;g2733;g2763;g2781;g2882;g2967;g2976;g3090;g3094;g3117;g3216;g3260;g3310;g3384;g3396;g3411;g3422;g3447;g3455;g3478;g3511;g3529;g3696;g3…
195	GO:0048285	organelle fission	90 (10%)	559 (6.84%)	9.6e-05	0.003897	g103;g496;g522;g618;g728;g749;g789;g1192;g1278;g1493;g1588;g1716;g1742;g1758;g1889;g2295;g2388;g2534;g2882;g2929;g3335;g3375;g3410;g3422;g3453;g3456;g3537;g3945;g4174;g4738;g4805;g5132;g5621;g5622;g5650;g6007;g6032;g6170;g6203;g6284;g6327;g6379;g6572;g6759;g6899;g6919;g7781;g7866;g7877;g8008;g8065;g8081;g8362;g8638;g8654;g8657;g9167;g9206;g9283;g9548;g9612;g9793;g9853;g10100;g588;g1219;g2854;g320…
196	GO:0007034	vacuolar transport	31 (3.44%)	140 (1.71%)	9.7e-05	0.003943	g69;g103;g1008;g1845;g1878;g2763;g3455;g4205;g4576;g5089;g6093;g6358;g6476;g6813;g6982;g7290;g7629;g8496;g8525;g8568;g8607;g8778;g9021;g9198;g9878;g10246;g10650;g1718;g3621;g5616;g8495
197	GO:0031399	regulation of protein modification process	116 (12.89%)	760 (9.29%)	9.8e-05	0.003966	g496;g618;g789;g1192;g1278;g1335;g1380;g1398;g1588;g1600;g1637;g1881;g1890;g1935;g2013;g2028;g2067;g2670;g2865;g2882;g3090;g3117;g3384;g3407;g3422;g3482;g3537;g3701;g3800;g3831;g3882;g3938;g3952;g4433;g4805;g4859;g5356;g5651;g5747;g6018;g6032;g6170;g6285;g6295;g6327;g6379;g6572;g6755;g6815;g6899;g6919;g6982;g7087;g7283;g7290;g7319;g7635;g7877;g8496;g8607;g8654;g8657;g8727;g8801;g9612;g9675;g9805;…
198	GO:0032269	negative regulation of cellular protein metabolic process	87 (9.67%)	537 (6.57%)	0.0001	0.004027	g294;g618;g719;g789;g1380;g1588;g1637;g1890;g1935;g2013;g2028;g2067;g2670;g2865;g2882;g2967;g3356;g3384;g3407;g3411;g3422;g3800;g3831;g3882;g3945;g4067;g4374;g4433;g4680;g4859;g5356;g5651;g5747;g5752;g5763;g5953;g6025;g6170;g6295;g6572;g6670;g6755;g6800;g6815;g6842;g6919;g6924;g7290;g7319;g8384;g8496;g8576;g8654;g8868;g8873;g9791;g9820;g10070;g10128;g10226;g10264;g10270;g10553;g10599;g10601;g3203…
199	GO:0006511	ubiquitin-dependent protein catabolic process	75 (8.33%)	448 (5.48%)	0.000107	0.004262	g496;g502;g618;g789;g1193;g1217;g1335;g1398;g1588;g1964;g2251;g2473;g2697;g2781;g3090;g3422;g3455;g3831;g3882;g4226;g4374;g4415;g4433;g4517;g4545;g4552;g4680;g4733;g5132;g5275;g5651;g6098;g6170;g6203;g6572;g6752;g6788;g6815;g7028;g7290;g7319;g7748;g7781;g7878;g8226;g8496;g8525;g8607;g8822;g8972;g9853;g9869;g10112;g10270;g10391;g10599;g1219;g1834;g594;g760;g1194;g1226;g1835;g1955;g2937;g3766;g4474…
200	GO:0000723	telomere maintenance	26 (2.89%)	110 (1.35%)	0.000113	0.004508	g1464;g1713;g1761;g2679;g2929;g3411;g6074;g6170;g6842;g8299;g8362;g8657;g8727;g9793;g10128;g10599;g1255;g5563;g8068;g654;g1256;g3885;g4793;g6204;g10537;g10649
201	GO:0006310	DNA recombination	63 (7%)	361 (4.41%)	0.000115	0.004555	g201;g294;g657;g728;g749;g1500;g2858;g2929;g3074;g3125;g3310;g3407;g3411;g3419;g3486;g3564;g4174;g4427;g4805;g5137;g5275;g5621;g5622;g5650;g6170;g6203;g6284;g6509;g6621;g6670;g6759;g6899;g6919;g7290;g7748;g7866;g7916;g8065;g8362;g8384;g8607;g8657;g8727;g9221;g9254;g9793;g3887;g4732;g4974;g5563;g6028;g654;g3207;g3885;g4739;g4829;g5620;g6917;g7475;g8064;g8380;g8941;g10269
202	GO:0051321	meiotic cell cycle	65 (7.22%)	376 (4.6%)	0.00012	0.004713	g201;g728;g749;g789;g1464;g1493;g1588;g1716;g1742;g1758;g1889;g2376;g2388;g2534;g2929;g3335;g3410;g3422;g3537;g4174;g4576;g4738;g4805;g5027;g5621;g5622;g5650;g6170;g6284;g6813;g6842;g6899;g6919;g7866;g7877;g8008;g8065;g8362;g8496;g8638;g8640;g8654;g8657;g9167;g9206;g9612;g9793;g9853;g588;g2854;g6028;g1170;g1888;g3408;g4841;g5620;g6816;g7475;g7613;g7680;g8380;g8430;g8574;g8941;g10269
203	GO:0048599	oocyte development	36 (4%)	174 (2.13%)	0.000123	0.004771	g103;g749;g1192;g2295;g2882;g2929;g3094;g3444;g3478;g3529;g3952;g4067;g4174;g4738;g5113;g5485;g7391;g8008;g8638;g9231;g9675;g10226;g10650;g588;g1288;g2854;g7227;g1287;g4841;g5399;g6031;g6378;g6816;g9022;g9203;g10153
204	GO:0032270	positive regulation of cellular protein metabolic process	98 (10.89%)	624 (7.63%)	0.000123	0.004771	g496;g1278;g1335;g1398;g1588;g1600;g1717;g1881;g2028;g2067;g2670;g3090;g3117;g3208;g3384;g3455;g3482;g3537;g3701;g3882;g3938;g3952;g4340;g4523;g4805;g4842;g5356;g5651;g6018;g6029;g6032;g6170;g6203;g6285;g6295;g6327;g6470;g6759;g6771;g6899;g6919;g6982;g7283;g7319;g7635;g7877;g8496;g8508;g8525;g8607;g8640;g8727;g8801;g9612;g9675;g9805;g9853;g9869;g9994;g10070;g10112;g10128;g10378;g10553;g10638;g121…
205	GO:0006914	autophagy	57 (6.33%)	319 (3.9%)	0.000127	0.004915	g63;g103;g496;g580;g615;g765;g1008;g1221;g1717;g1881;g2249;g2295;g2763;g2980;g3312;g3384;g3627;g4138;g4576;g4680;g4993;g5089;g5429;g5651;g5862;g6032;g6093;g6303;g6720;g6752;g6815;g6899;g6944;g7319;g7572;g7629;g8496;g8525;g8607;g8778;g10246;g10261;g10270;g10447;g3141;g10173;g1309;g1718;g2937;g4739;g4994;g5616;g6415;g6888;g7475;g8495;g9203
206	GO:0040008	regulation of growth	86 (9.56%)	533 (6.52%)	0.000127	0.004915	g103;g496;g527;g657;g710;g719;g765;g1192;g1221;g1398;g1499;g1717;g2013;g2670;g2707;g2882;g3117;g3356;g3384;g3455;g3627;g3701;g3831;g3853;g3898;g3909;g3938;g4415;g4792;g5251;g5356;g5485;g5651;g5862;g6032;g6093;g6122;g6170;g6303;g6379;g6470;g6759;g6815;g6842;g6899;g7635;g7877;g7949;g7951;g8365;g8390;g8548;g8801;g8985;g9011;g9254;g9548;g9779;g10006;g10052;g10070;g10128;g10226;g10447;g5563;g654;g1337…
207	GO:0051248	negative regulation of protein metabolic process	88 (9.78%)	549 (6.71%)	0.000135	0.005161	g294;g618;g719;g789;g1380;g1588;g1637;g1890;g1935;g2013;g2028;g2067;g2670;g2865;g2882;g2967;g3356;g3384;g3407;g3411;g3421;g3422;g3800;g3831;g3882;g3945;g4067;g4374;g4433;g4680;g4859;g5356;g5651;g5747;g5752;g5763;g5953;g6025;g6170;g6295;g6572;g6670;g6755;g6800;g6815;g6842;g6919;g6924;g7290;g7319;g8384;g8496;g8576;g8654;g8868;g8873;g9791;g9820;g10070;g10128;g10226;g10264;g10270;g10553;g10599;g10601…
208	GO:0031325	positive regulation of cellular metabolic process	198 (22%)	1430 (17.49%)	0.000135	0.005161	g73;g198;g496;g580;g765;g955;g1008;g1221;g1278;g1335;g1365;g1398;g1462;g1499;g1500;g1588;g1600;g1691;g1717;g1881;g1948;g2013;g2028;g2067;g2206;g2249;g2270;g2376;g2670;g2763;g2929;g2980;g3090;g3117;g3183;g3208;g3356;g3384;g3396;g3407;g3411;g3427;g3455;g3482;g3537;g3627;g3696;g3701;g3875;g3882;g3898;g3902;g3938;g3945;g3952;g4340;g4366;g4374;g4523;g4531;g4665;g4805;g4842;g5356;g5398;g5400;g5575;g565…
209	GO:0043043	peptide biosynthetic process	119 (13.22%)	790 (9.66%)	0.000141	0.005343	g73;g95;g294;g655;g719;g1107;g1292;g1365;g1713;g1716;g1717;g1742;g1877;g1893;g2067;g2625;g2742;g2864;g3208;g3220;g3356;g3384;g3411;g3419;g3428;g3486;g3540;g3886;g3945;g3987;g4067;g4340;g4531;g4545;g4859;g4933;g4950;g4995;g5113;g5137;g5203;g5763;g5953;g5989;g6007;g6025;g6029;g6621;g6670;g6759;g6771;g6800;g6842;g6899;g6924;g6990;g7576;g8384;g8576;g8764;g8868;g8873;g9221;g9231;g9283;g9612;g9791;g979…
210	GO:0033621	nuclear-transcribed mRNA catabolic process, meiosis-specific transcripts	4 (0.44%)	4 (0.05%)	0.000146	0.005489	g873;g3343;g8732;g10537
211	GO:0070544	histone H3-K36 demethylation	4 (0.44%)	4 (0.05%)	0.000146	0.005489	g579;g580;g2473;g9272
212	GO:0006275	regulation of DNA replication	33 (3.67%)	156 (1.91%)	0.000149	0.005597	g198;g496;g1464;g1761;g2781;g2929;g3310;g3407;g3486;g3537;g4433;g5356;g5467;g6074;g6170;g6621;g6842;g6899;g6919;g8362;g8607;g8657;g8727;g10128;g3202;g5563;g8068;g6204;g7475;g8567;g8941;g10537;g10649
213	GO:0048608	reproductive structure development	62 (6.89%)	357 (4.37%)	0.00015	0.005597	g103;g710;g789;g806;g807;g1398;g1462;g1493;g1691;g2295;g2670;g2929;g3117;g3356;g3384;g3411;g3422;g4174;g4205;g4517;g4680;g4777;g5132;g5356;g5467;g5651;g5763;g6074;g6470;g6759;g6800;g6899;g6903;g6924;g7087;g7635;g7877;g8299;g8365;g8381;g8657;g9548;g9853;g10070;g10104;g760;g1632;g1718;g4739;g5335;g5399;g5616;g6378;g7915;g7984;g8064;g8574;g9022;g9203;g9957;g10145;g10153
214	GO:0009994	oocyte differentiation	38 (4.22%)	189 (2.31%)	0.000151	0.005597	g103;g749;g1192;g2295;g2882;g2929;g3094;g3444;g3478;g3529;g3952;g4067;g4174;g4738;g5113;g5485;g5763;g7391;g8008;g8638;g9231;g9675;g10226;g10650;g588;g1288;g2854;g7227;g1287;g4329;g4841;g5399;g6031;g6378;g6816;g9022;g9203;g10153
215	GO:0023056	positive regulation of signaling	100 (11.11%)	643 (7.86%)	0.000152	0.005624	g103;g496;g527;g624;g710;g765;g789;g1217;g1398;g1495;g1600;g1691;g1948;g2013;g2295;g2707;g2967;g3117;g3281;g3384;g3422;g3455;g3456;g3627;g3701;g3831;g3882;g3902;g3938;g4415;g4842;g4989;g5429;g5651;g5953;g6015;g6018;g6032;g6098;g6170;g6295;g6327;g6759;g6815;g6899;g6982;g7315;g7319;g7809;g7877;g7949;g7951;g8362;g8365;g8496;g8548;g8607;g8732;g8778;g8801;g9254;g9675;g9805;g9820;g9869;g9994;g10070;g10…
216	GO:0043487	regulation of RNA stability	18 (2%)	65 (0.79%)	0.000154	0.005679	g1761;g3343;g3384;g3410;g3411;g3938;g4340;g5268;g5752;g6074;g6842;g6899;g9791;g10128;g8068;g5674;g6204;g8080
217	GO:0006417	regulation of translation	59 (6.56%)	336 (4.11%)	0.000159	0.005807	g294;g719;g1107;g1292;g1717;g2067;g2864;g3208;g3356;g3384;g3411;g3428;g3945;g4067;g4340;g4545;g4933;g4995;g5113;g5137;g5763;g5953;g6025;g6029;g6670;g6759;g6771;g6842;g6899;g6924;g6990;g8384;g8576;g8764;g8868;g8873;g9231;g9612;g9791;g9793;g10128;g10226;g10264;g10378;g10553;g10601;g3203;g3342;g2319;g3423;g3901;g4412;g5392;g5764;g6378;g8064;g8574;g8993;g9852
218	GO:0006406	mRNA export from nucleus	24 (2.67%)	100 (1.22%)	0.00016	0.005807	g1015;g1761;g2111;g3343;g3356;g3411;g3427;g3453;g3482;g4067;g5113;g5752;g6074;g6670;g6924;g6990;g7781;g8732;g588;g1291;g1985;g4807;g4829;g7940
219	GO:0071427	mRNA-containing ribonucleoprotein complex export from nucleus	24 (2.67%)	100 (1.22%)	0.00016	0.005807	g1015;g1761;g2111;g3343;g3356;g3411;g3427;g3453;g3482;g4067;g5113;g5752;g6074;g6670;g6924;g6990;g7781;g8732;g588;g1291;g1985;g4807;g4829;g7940
220	GO:0061458	reproductive system development	62 (6.89%)	358 (4.38%)	0.000163	0.005887	g103;g710;g789;g806;g807;g1398;g1462;g1493;g1691;g2295;g2670;g2929;g3117;g3356;g3384;g3411;g3422;g4174;g4205;g4517;g4680;g4777;g5132;g5356;g5467;g5651;g5763;g6074;g6470;g6759;g6800;g6899;g6903;g6924;g7087;g7635;g7877;g8299;g8365;g8381;g8657;g9548;g9853;g10070;g10104;g760;g1632;g1718;g4739;g5335;g5399;g5616;g6378;g7915;g7984;g8064;g8574;g9022;g9203;g9957;g10145;g10153
221	GO:0044699	single-organism process	799 (88.78%)	6935 (84.8%)	0.000167	0.00602	g63;g69;g73;g83;g99;g103;g175;g198;g201;g213;g294;g308;g316;g384;g496;g502;g509;g522;g527;g563;g579;g580;g587;g615;g618;g624;g655;g657;g699;g710;g719;g728;g749;g753;g765;g771;g784;g789;g806;g807;g829;g929;g932;g945;g981;g1008;g1015;g1088;g1107;g1192;g1193;g1217;g1221;g1278;g1292;g1335;g1362;g1365;g1380;g1398;g1462;g1464;g1480;g1493;g1495;g1499;g1500;g1554;g1588;g1600;g1631;g1637;g1691;g1713;g1716…
222	GO:0051345	positive regulation of hydrolase activity	55 (6.11%)	308 (3.77%)	0.000169	0.006062	g710;g929;g1554;g1965;g1991;g2013;g2028;g2206;g2368;g2670;g2882;g2967;g3090;g3312;g3384;g3445;g3455;g3945;g4523;g4805;g4842;g5375;g6015;g6032;g6203;g6800;g6815;g6899;g6982;g7391;g7781;g7877;g8229;g8508;g8548;g8607;g8801;g9173;g9793;g10246;g10650;g1056;g1310;g591;g1902;g1955;g2698;g4739;g5616;g6415;g6754;g6888;g7015;g7984;g9807
223	GO:0002376	immune system process	131 (14.56%)	889 (10.87%)	0.000172	0.006089	g73;g201;g294;g496;g749;g1008;g1107;g1217;g1362;g1493;g1588;g1819;g1890;g1935;g1948;g2013;g2028;g2929;g3125;g3216;g3343;g3375;g3384;g3407;g3410;g3455;g3456;g3478;g3909;g4205;g4226;g4340;g4415;g4601;g4973;g4993;g5132;g5203;g5627;g5651;g5763;g5793;g5953;g6032;g6098;g6203;g6285;g6327;g6340;g6345;g6356;g6379;g6385;g6565;g6572;g6759;g6839;g6899;g6924;g6982;g7391;g7528;g7576;g7748;g7877;g8226;g8384;g85…
224	GO:0051647	nucleus localization	17 (1.89%)	60 (0.73%)	0.000172	0.006089	g749;g1192;g1758;g3094;g3335;g3375;g4374;g5621;g5622;g8638;g8985;g9113;g7227;g7686;g1169;g3207;g5620
225	GO:0060341	regulation of cellular localization	85 (9.44%)	530 (6.48%)	0.000173	0.006089	g63;g103;g496;g749;g765;g789;g1192;g1752;g1878;g2013;g2206;g2295;g2368;g2693;g2763;g2882;g3094;g3144;g3312;g3339;g3422;g3453;g3455;g3478;g3902;g4205;g4301;g4584;g4805;g5132;g5356;g5375;g5651;g5752;g6032;g6295;g6572;g6670;g6780;g6815;g6899;g7290;g7748;g7781;g7877;g8496;g8525;g8548;g8732;g8778;g9011;g9021;g9198;g9218;g9805;g9820;g10006;g10070;g10112;g10255;g10270;g10450;g588;g3202;g7227;g654;g1955;…
226	GO:0033044	regulation of chromosome organization	59 (6.56%)	337 (4.12%)	0.000173	0.006089	g618;g749;g789;g1278;g1462;g1464;g1499;g1500;g1761;g2376;g2661;g3335;g3411;g3422;g3453;g3831;g4433;g4531;g4557;g6074;g6170;g6203;g6284;g6572;g6780;g6842;g6919;g7283;g7866;g8299;g8362;g8657;g8727;g9206;g9218;g9612;g9675;g9853;g10070;g10128;g10447;g10599;g1219;g2854;g3202;g5026;g6066;g8068;g654;g1226;g1955;g6067;g6204;g7475;g8430;g8574;g8941;g10537;g10649
227	GO:0048584	positive regulation of response to stimulus	123 (13.67%)	826 (10.1%)	0.000178	0.006212	g73;g103;g201;g496;g527;g624;g710;g765;g789;g1008;g1192;g1217;g1398;g1588;g1600;g1631;g1691;g1878;g1948;g2013;g2249;g2707;g2742;g2763;g2967;g2980;g3117;g3281;g3312;g3339;g3384;g3407;g3422;g3455;g3456;g3627;g3701;g3831;g3882;g3938;g4415;g4842;g4989;g5356;g5429;g5651;g5953;g6015;g6018;g6032;g6098;g6122;g6170;g6327;g6681;g6759;g6899;g6982;g7315;g7319;g7748;g7809;g7877;g7949;g7951;g8362;g8365;g8496;g…
228	GO:0016310	phosphorylation	142 (15.78%)	978 (11.96%)	0.000179	0.006222	g63;g99;g384;g496;g514;g527;g563;g710;g789;g829;g932;g1008;g1107;g1192;g1278;g1362;g1380;g1600;g1637;g1881;g1890;g1935;g2013;g2028;g2067;g2368;g2670;g2865;g2882;g3117;g3281;g3318;g3344;g3377;g3384;g3407;g3456;g3537;g3701;g3800;g3882;g3938;g3952;g4301;g4592;g4680;g4805;g4897;g4989;g5268;g5608;g5651;g5747;g5793;g5831;g6015;g6018;g6029;g6032;g6041;g6170;g6285;g6289;g6303;g6327;g6379;g6637;g6775;g689…
229	GO:0007283	spermatogenesis	57 (6.33%)	323 (3.95%)	0.000179	0.006222	g103;g294;g749;g784;g1278;g1493;g1588;g1758;g1889;g2929;g3335;g3422;g3511;g3886;g3938;g4174;g4523;g4665;g4680;g5027;g5137;g5275;g5429;g5554;g5621;g5622;g6759;g6780;g6842;g7877;g8226;g8638;g8657;g8985;g9167;g9612;g10070;g10226;g10255;g588;g1288;g1170;g1287;g1888;g1902;g4481;g5620;g6031;g6378;g6754;g6770;g6888;g8430;g8574;g9022;g9203;g9854
230	GO:0009792	embryo development ending in birth or egg hatching	87 (9.67%)	546 (6.68%)	0.000182	0.006268	g103;g1107;g1192;g1493;g1794;g1948;g2013;g2028;g2368;g2781;g2882;g2929;g3117;g3216;g3375;g3410;g3427;g3453;g3456;g3882;g3945;g4205;g4374;g4517;g4545;g4680;g5089;g5126;g5132;g5137;g5485;g5818;g6122;g6327;g6379;g6385;g6470;g6475;g6670;g6752;g6800;g6842;g6982;g7635;g7705;g7781;g7809;g7877;g7952;g8362;g8503;g8657;g8801;g8942;g9113;g9548;g9675;g10070;g10246;g10264;g10638;g588;g5563;g6028;g7686;g10173;…
231	GO:0007010	cytoskeleton organization	124 (13.78%)	835 (10.21%)	0.000188	0.006451	g63;g103;g201;g308;g384;g496;g527;g618;g749;g753;g765;g789;g1192;g1493;g1495;g1631;g1637;g1742;g1758;g2004;g2013;g2206;g2249;g2368;g2670;g2882;g2929;g3094;g3260;g3310;g3335;g3384;g3453;g3455;g3529;g3620;g3696;g3725;g3945;g3952;g4067;g4174;g4738;g4805;g4993;g5113;g5126;g5356;g5429;g5485;g5554;g5621;g5622;g5651;g5730;g6029;g6273;g6303;g6511;g6572;g6759;g6800;g6807;g6870;g7319;g7391;g7635;g7781;g800…
232	GO:0034645	cellular macromolecule biosynthetic process	386 (42.89%)	3058 (37.39%)	0.000192	0.006567	g69;g73;g175;g198;g294;g496;g579;g580;g655;g710;g719;g728;g753;g789;g807;g955;g1008;g1107;g1217;g1221;g1278;g1292;g1365;g1398;g1462;g1464;g1499;g1500;g1691;g1713;g1716;g1717;g1742;g1761;g1877;g1881;g1890;g1893;g1911;g1938;g1948;g1991;g2025;g2028;g2067;g2111;g2206;g2249;g2251;g2270;g2318;g2376;g2473;g2521;g2625;g2661;g2679;g2742;g2781;g2858;g2864;g2929;g3094;g3125;g3183;g3208;g3220;g3281;g3310;g33…
233	GO:0051169	nuclear transport	55 (6.11%)	310 (3.79%)	0.000201	0.006867	g955;g1015;g1752;g1761;g1971;g2013;g2111;g2136;g3144;g3216;g3343;g3356;g3411;g3422;g3427;g3453;g3482;g3853;g4067;g4301;g4366;g4523;g4805;g5113;g5139;g5554;g5651;g5752;g6074;g6340;g6572;g6670;g6681;g6899;g6924;g6990;g7290;g7781;g8607;g8732;g9218;g10012;g10070;g10255;g10450;g588;g199;g654;g1291;g1309;g1985;g4807;g4829;g7940;g8064
234	GO:0098787	mRNA cleavage involved in mRNA processing	8 (0.89%)	17 (0.21%)	0.000204	0.00687	g1752;g2111;g2781;g3356;g8732;g7159;g7160;g7940
235	GO:0098789	pre-mRNA cleavage required for polyadenylation	8 (0.89%)	17 (0.21%)	0.000204	0.00687	g1752;g2111;g2781;g3356;g8732;g7159;g7160;g7940
236	GO:0061647	histone H3-K9 modification	11 (1.22%)	30 (0.37%)	0.000204	0.00687	g2376;g6919;g7283;g8657;g8727;g9206;g9612;g9675;g10070;g5026;g7475
237	GO:0045859	regulation of protein kinase activity	49 (5.44%)	268 (3.28%)	0.000214	0.007158	g496;g1380;g1600;g1881;g2013;g2028;g2067;g2882;g3117;g3384;g3407;g3537;g3701;g3800;g3938;g3952;g4805;g5651;g5747;g6018;g6032;g6170;g6285;g6327;g6379;g6899;g6982;g7635;g8496;g9994;g10638;g1255;g3202;g5026;g7686;g1256;g1849;g4341;g4739;g4807;g5785;g6308;g6378;g6754;g6816;g7939;g9203;g9995;g10390
238	GO:0006412	translation	110 (12.22%)	727 (8.89%)	0.000215	0.007187	g294;g655;g719;g1107;g1292;g1365;g1713;g1716;g1717;g1742;g1877;g1893;g2067;g2742;g2864;g3208;g3220;g3356;g3384;g3411;g3419;g3428;g3486;g3540;g3945;g3987;g4067;g4340;g4531;g4545;g4859;g4933;g4950;g4995;g5113;g5137;g5203;g5763;g5953;g5989;g6007;g6025;g6029;g6621;g6670;g6759;g6771;g6800;g6842;g6899;g6924;g6990;g7576;g8384;g8576;g8764;g8868;g8873;g9221;g9231;g9283;g9612;g9791;g9793;g10052;g10128;g102…
239	GO:0046700	heterocycle catabolic process	71 (7.89%)	428 (5.23%)	0.000217	0.007208	g294;g719;g873;g1464;g1713;g1761;g1877;g2376;g3117;g3135;g3220;g3343;g3356;g3384;g3410;g3411;g3886;g3938;g3945;g4067;g4993;g5113;g5203;g5268;g5752;g5763;g6074;g6385;g6842;g6893;g6899;g7181;g7752;g7877;g8299;g8607;g8732;g9221;g9239;g9612;g9791;g10052;g10128;g10226;g10264;g10553;g1972;g3342;g5195;g8068;g92;g1218;g1336;g2853;g3462;g3628;g4478;g4739;g5674;g6042;g6204;g6754;g6923;g7728;g8064;g8080;g87…
240	GO:0033365	protein localization to organelle	98 (10.89%)	634 (7.75%)	0.000224	0.0074	g496;g749;g789;g829;g1008;g1015;g1588;g1877;g2013;g2136;g2929;g2980;g3411;g3422;g3427;g3453;g3455;g3853;g4205;g4301;g4366;g4374;g4523;g4576;g4805;g5089;g5137;g5139;g5203;g5275;g5554;g5621;g5622;g5650;g5651;g5752;g6358;g6470;g6572;g6621;g6681;g6752;g6780;g6800;g6813;g6899;g7290;g7391;g7629;g7705;g7781;g7877;g8362;g8496;g8638;g8657;g8778;g8822;g9878;g10052;g10070;g10246;g10255;g10447;g10450;g10601;…
241	GO:0031344	regulation of cell projection organization	57 (6.33%)	326 (3.99%)	0.000231	0.0076	g63;g201;g527;g749;g929;g1192;g1398;g1493;g1631;g1717;g2013;g2206;g2295;g3117;g3260;g3384;g3725;g3909;g3938;g3952;g4805;g4952;g5251;g5429;g5651;g5862;g6032;g6122;g6511;g6670;g6766;g6815;g7635;g7781;g8008;g8365;g8548;g8868;g9548;g9820;g10052;g10226;g10450;g10638;g7227;g1555;g2538;g3477;g4169;g4329;g6308;g7015;g7475;g7518;g9203;g9807;g10463
242	GO:0016570	histone modification	56 (6.22%)	319 (3.9%)	0.000235	0.007707	g198;g579;g580;g2249;g2376;g2473;g2781;g2929;g3422;g3875;g3882;g3987;g4433;g4842;g4859;g5953;g6285;g6295;g6340;g6422;g6759;g6780;g6815;g6840;g6919;g7283;g7319;g7687;g7748;g8362;g8503;g8508;g8525;g8657;g8727;g8735;g9206;g9254;g9612;g9675;g9793;g10009;g10070;g10447;g10599;g5026;g1170;g1955;g2319;g2937;g4829;g4862;g5794;g7475;g8038;g9272
243	GO:0016070	RNA metabolic process	364 (40.44%)	2871 (35.11%)	0.000241	0.007876	g73;g198;g294;g496;g497;g579;g580;g710;g719;g728;g749;g753;g789;g873;g945;g955;g1008;g1217;g1221;g1278;g1292;g1365;g1398;g1462;g1464;g1499;g1500;g1524;g1691;g1713;g1752;g1758;g1761;g1819;g1877;g1881;g1889;g1890;g1911;g1938;g1948;g1991;g2013;g2028;g2050;g2067;g2111;g2206;g2249;g2251;g2270;g2318;g2376;g2473;g2521;g2661;g2670;g2679;g2742;g2781;g2864;g2929;g3094;g3117;g3125;g3183;g3220;g3281;g3335;g3…
244	GO:0006810	transport	361 (40.11%)	2845 (34.79%)	0.000244	0.007927	g63;g69;g103;g201;g294;g384;g496;g509;g657;g699;g749;g757;g765;g771;g806;g829;g932;g955;g981;g1008;g1015;g1107;g1192;g1217;g1335;g1398;g1495;g1500;g1554;g1600;g1631;g1691;g1716;g1752;g1758;g1761;g1794;g1819;g1845;g1877;g1878;g1881;g1903;g1935;g1938;g1965;g1971;g2004;g2013;g2067;g2111;g2136;g2206;g2249;g2270;g2295;g2364;g2368;g2388;g2623;g2670;g2693;g2711;g2742;g2763;g2882;g2967;g2976;g2980;g3094;…
245	GO:0051050	positive regulation of transport	58 (6.44%)	334 (4.08%)	0.000245	0.007927	g103;g384;g496;g749;g765;g1631;g1752;g1794;g1878;g2206;g2295;g2368;g2670;g2763;g3144;g3312;g3339;g3422;g3455;g3478;g3902;g4805;g5356;g5375;g5650;g5651;g5752;g6295;g6752;g6815;g6899;g7290;g7781;g8496;g8525;g8548;g8778;g9021;g9198;g9218;g9779;g9805;g10070;g10270;g588;g7227;g654;g2539;g3408;g4739;g4807;g5647;g6308;g6415;g6754;g6888;g7984;g9854
246	GO:1903046	meiotic cell cycle process	53 (5.89%)	298 (3.64%)	0.000246	0.007927	g728;g749;g789;g1493;g1588;g1716;g1742;g1889;g2376;g2388;g2534;g2929;g3335;g3410;g3422;g3537;g4174;g4738;g4805;g5621;g5622;g5650;g6284;g6813;g6899;g6919;g7866;g7877;g8008;g8065;g8362;g8496;g8654;g8657;g9167;g9206;g9612;g9793;g9853;g588;g2854;g1170;g1888;g3408;g4841;g5620;g7475;g7613;g7680;g8430;g8574;g8941;g10269
247	GO:0045860	positive regulation of protein kinase activity	33 (3.67%)	160 (1.96%)	0.000246	0.007927	g496;g1600;g1881;g2067;g3117;g3384;g3537;g3701;g3938;g3952;g4805;g6018;g6032;g6285;g6327;g6899;g6982;g7635;g9994;g10638;g1255;g3202;g5026;g7686;g1256;g1849;g4341;g4739;g6308;g7939;g9203;g9995;g10390
248	GO:0000910	cytokinesis	52 (5.78%)	291 (3.56%)	0.000249	0.007985	g103;g201;g749;g753;g1008;g1192;g1221;g1493;g1758;g1794;g2388;g2670;g2929;g3419;g3422;g3478;g3486;g4680;g4738;g4805;g5393;g5467;g5554;g5651;g6007;g6029;g6303;g6379;g6621;g6839;g7576;g8008;g8081;g8568;g9167;g9173;g9230;g10447;g3202;g3420;g6838;g1309;g1888;g1955;g3885;g4169;g4329;g5729;g7915;g7984;g9203;g10269
249	GO:0051656	establishment of organelle localization	66 (7.33%)	393 (4.81%)	0.000253	0.008068	g63;g103;g618;g749;g765;g1192;g1554;g1600;g1716;g1758;g1794;g1878;g2364;g2763;g2882;g2929;g3094;g3312;g3335;g3339;g3375;g3453;g3478;g3945;g4374;g4584;g4641;g4738;g5089;g5554;g5621;g5622;g5752;g6093;g6284;g6379;g6572;g6815;g7809;g8299;g8496;g8525;g8548;g8607;g8778;g8985;g9113;g9548;g9853;g10112;g10226;g10450;g1255;g4974;g7227;g7686;g1169;g1256;g1985;g3207;g3621;g3894;g5609;g5620;g7613;g8430
250	GO:0009967	positive regulation of signal transduction	88 (9.78%)	559 (6.84%)	0.000254	0.008075	g103;g496;g527;g624;g710;g789;g1217;g1398;g1600;g1691;g1948;g2013;g2707;g2967;g3117;g3281;g3384;g3422;g3455;g3456;g3627;g3701;g3831;g3882;g3938;g4415;g4842;g4989;g5429;g5651;g5953;g6015;g6018;g6032;g6098;g6170;g6327;g6759;g6899;g6982;g7315;g7319;g7809;g7877;g7949;g7951;g8362;g8365;g8496;g8607;g8732;g8801;g9254;g9675;g9805;g9869;g9994;g10070;g10553;g10638;g1255;g2854;g5026;g5471;g7686;g654;g760;g1…
251	GO:0006302	double-strand break repair	37 (4.11%)	187 (2.29%)	0.000257	0.008075	g728;g2929;g3407;g3422;g3427;g4174;g4433;g5137;g5621;g5622;g6170;g6203;g6815;g7290;g7748;g7866;g7877;g8362;g8607;g8654;g8727;g9254;g9793;g10255;g10666;g3887;g5563;g6028;g6066;g654;g3885;g4829;g5620;g5794;g6067;g8941;g10269
252	GO:0051130	positive regulation of cellular component organization	100 (11.11%)	652 (7.97%)	0.000258	0.008075	g103;g201;g384;g496;g527;g749;g765;g789;g1192;g1278;g1493;g1631;g1637;g1717;g1794;g2013;g2206;g2249;g2693;g2980;g3117;g3260;g3339;g3384;g3410;g3455;g3478;g3537;g3882;g3938;g3945;g4738;g4952;g5375;g5650;g6032;g6122;g6170;g6203;g6295;g6815;g6842;g6899;g6919;g7283;g7290;g7319;g7635;g7781;g7866;g7877;g8008;g8362;g8548;g8607;g8657;g8727;g8801;g8868;g9198;g9206;g9548;g9612;g9675;g9779;g9805;g9853;g1005…
253	GO:0022604	regulation of cell morphogenesis	55 (6.11%)	313 (3.83%)	0.00026	0.008075	g63;g527;g749;g929;g1192;g1398;g1631;g1717;g1758;g2670;g2882;g3094;g3117;g3384;g3529;g3909;g3938;g3952;g4805;g5251;g5429;g5651;g5862;g6032;g6122;g6511;g6766;g6815;g7635;g8365;g8548;g8801;g9198;g9548;g10052;g10070;g10112;g10226;g10450;g10564;g7227;g7686;g760;g1309;g1555;g2538;g4169;g5335;g6308;g7015;g7475;g8606;g8941;g9203;g9807
254	GO:0007097	nuclear migration	15 (1.67%)	51 (0.62%)	0.000262	0.008075	g749;g1192;g1758;g3094;g3335;g3375;g4374;g5621;g5622;g9113;g7227;g7686;g1169;g3207;g5620
255	GO:0031935	regulation of chromatin silencing	15 (1.67%)	51 (0.62%)	0.000262	0.008075	g789;g1278;g1462;g1499;g1500;g3831;g4531;g7866;g9206;g3202;g6066;g1955;g6067;g7475;g8941
256	GO:0032204	regulation of telomere maintenance	15 (1.67%)	51 (0.62%)	0.000262	0.008075	g1464;g1761;g3411;g6074;g6842;g8299;g8362;g8657;g10128;g10599;g8068;g654;g6204;g10537;g10649
257	GO:0040023	establishment of nucleus localization	15 (1.67%)	51 (0.62%)	0.000262	0.008075	g749;g1192;g1758;g3094;g3335;g3375;g4374;g5621;g5622;g9113;g7227;g7686;g1169;g3207;g5620
258	GO:0048017	inositol lipid-mediated signaling	15 (1.67%)	51 (0.62%)	0.000262	0.008075	g384;g765;g1008;g1398;g2013;g3800;g4576;g4584;g5651;g6303;g9167;g9820;g10246;g10601;g7727
259	GO:0043066	negative regulation of apoptotic process	54 (6%)	306 (3.74%)	0.000264	0.008101	g201;g294;g753;g1015;g1588;g1890;g2028;g2670;g3384;g3456;g3831;g4545;g4680;g4893;g4993;g5356;g5651;g5673;g5752;g6098;g6800;g6842;g7877;g8503;g8607;g8801;g8972;g9805;g10006;g10255;g10391;g1310;g3141;g5026;g5563;g1309;g1849;g1955;g2248;g3423;g3477;g3766;g4994;g5392;g6308;g6754;g7029;g8570;g8738;g9022;g9109;g9854;g10194;g10464
260	GO:0042325	regulation of phosphorylation	82 (9.11%)	514 (6.29%)	0.000269	0.008203	g496;g1008;g1192;g1278;g1380;g1600;g1637;g1881;g1890;g1935;g2013;g2028;g2067;g2670;g2865;g2882;g3117;g3384;g3407;g3537;g3701;g3800;g3938;g3952;g4805;g5651;g5747;g6018;g6032;g6170;g6285;g6327;g6379;g6899;g6982;g7319;g7635;g7877;g8496;g8607;g8657;g8801;g9805;g9820;g9994;g10070;g10255;g10270;g10553;g10638;g1255;g2854;g3202;g5026;g5563;g7686;g1256;g1336;g1337;g1849;g1955;g2698;g3311;g4169;g4329;g4341…
261	GO:0016049	cell growth	57 (6.33%)	328 (4.01%)	0.000272	0.008269	g63;g527;g563;g1717;g2013;g2364;g3117;g3356;g3384;g3627;g3831;g3853;g3909;g3938;g3945;g4374;g4415;g4601;g5251;g5356;g5651;g5862;g6032;g6122;g6273;g6815;g6924;g6979;g7319;g7949;g7951;g8226;g8365;g8548;g8985;g9239;g9548;g9675;g10052;g10070;g10128;g588;g1337;g1555;g1955;g3423;g3477;g4368;g5335;g5674;g6204;g6308;g6719;g8574;g9109;g9203;g10153
262	GO:0042592	homeostatic process	124 (13.78%)	843 (10.31%)	0.000282	0.008553	g83;g496;g657;g699;g806;g1008;g1107;g1221;g1335;g1464;g1495;g1713;g1761;g1845;g1878;g1881;g2013;g2028;g2295;g2679;g2693;g2763;g2929;g3344;g3377;g3411;g3627;g3701;g4433;g4545;g4592;g4844;g5118;g5203;g5251;g5356;g5429;g5467;g5651;g5747;g6018;g6074;g6170;g6295;g6327;g6369;g6379;g6720;g6775;g6815;g6842;g6894;g6899;g7079;g7576;g7756;g7850;g8008;g8081;g8226;g8299;g8362;g8365;g8381;g8568;g8569;g8657;g87…
263	GO:0044710	single-organism metabolic process	418 (46.44%)	3356 (41.04%)	0.000286	0.008635	g69;g83;g99;g103;g175;g198;g201;g213;g294;g384;g496;g502;g579;g580;g624;g657;g728;g749;g765;g789;g807;g829;g981;g1008;g1088;g1107;g1221;g1292;g1335;g1365;g1380;g1464;g1500;g1588;g1600;g1713;g1761;g1877;g1881;g1890;g1911;g1935;g1964;g2004;g2013;g2025;g2249;g2270;g2376;g2473;g2623;g2625;g2670;g2674;g2679;g2723;g2733;g2781;g2858;g2864;g2865;g2929;g2976;g3074;g3094;g3117;g3125;g3135;g3310;g3318;g3345…
264	GO:0051173	positive regulation of nitrogen compound metabolic process	186 (20.67%)	1349 (16.5%)	0.000289	0.008692	g73;g198;g496;g580;g955;g1008;g1221;g1278;g1335;g1365;g1398;g1462;g1499;g1500;g1588;g1600;g1691;g1717;g1881;g1948;g2013;g2028;g2067;g2206;g2249;g2270;g2376;g2670;g2929;g3090;g3117;g3183;g3208;g3356;g3384;g3396;g3407;g3411;g3427;g3455;g3482;g3537;g3696;g3701;g3875;g3882;g3898;g3902;g3938;g3945;g3952;g4340;g4366;g4374;g4433;g4523;g4531;g4665;g4805;g4842;g5356;g5398;g5400;g5575;g5651;g6018;g6029;g60…
265	GO:0044087	regulation of cellular component biogenesis	89 (9.89%)	569 (6.96%)	0.000293	0.008788	g63;g73;g201;g294;g527;g719;g749;g765;g1192;g1398;g1493;g1499;g1500;g1631;g1637;g1845;g2013;g2206;g2295;g2368;g2661;g2670;g2980;g3094;g3183;g3208;g3335;g3384;g3725;g3882;g3945;g4557;g4738;g5089;g5429;g5651;g6093;g6303;g6511;g6766;g6800;g6842;g7319;g7629;g7635;g7866;g7877;g7918;g8362;g8496;g8525;g8548;g8607;g8778;g8801;g8868;g9011;g9173;g9218;g9548;g9612;g9869;g10070;g10226;g10450;g3203;g5026;g654…
266	GO:0034248	regulation of cellular amide metabolic process	63 (7%)	373 (4.56%)	0.000297	0.008827	g73;g294;g719;g1107;g1292;g1717;g2067;g2864;g3208;g3356;g3384;g3411;g3428;g3945;g4067;g4340;g4545;g4933;g4995;g5113;g5137;g5763;g5953;g6025;g6029;g6670;g6759;g6771;g6842;g6899;g6924;g6990;g8384;g8576;g8764;g8868;g8873;g9231;g9612;g9791;g9793;g10128;g10226;g10264;g10378;g10553;g10601;g3203;g3342;g654;g1902;g2319;g3423;g3901;g3944;g4412;g5392;g5764;g6378;g8064;g8574;g8993;g9852
267	GO:0009059	macromolecule biosynthetic process	389 (43.22%)	3099 (37.89%)	0.000297	0.008827	g69;g73;g103;g175;g198;g294;g496;g579;g580;g655;g710;g719;g728;g753;g789;g807;g955;g1008;g1107;g1217;g1221;g1278;g1292;g1365;g1398;g1462;g1464;g1499;g1500;g1691;g1713;g1716;g1717;g1742;g1761;g1877;g1881;g1890;g1893;g1911;g1938;g1948;g1991;g2025;g2028;g2067;g2111;g2206;g2249;g2251;g2270;g2318;g2376;g2473;g2521;g2625;g2661;g2679;g2742;g2781;g2858;g2864;g2929;g3094;g3125;g3183;g3208;g3220;g3281;g331…
268	GO:0044088	regulation of vacuole organization	12 (1.33%)	36 (0.44%)	0.000298	0.008827	g63;g765;g2249;g2980;g5089;g5429;g7629;g8525;g8778;g10246;g10447;g8495
269	GO:0007044	cell-substrate junction assembly	9 (1%)	22 (0.27%)	0.000299	0.008838	g2206;g5132;g5651;g6340;g6511;g7635;g10553;g10599;g7015
270	GO:0031326	regulation of cellular biosynthetic process	287 (31.89%)	2207 (26.99%)	0.000308	0.009026	g73;g103;g198;g294;g496;g579;g580;g719;g753;g789;g955;g1008;g1107;g1217;g1221;g1278;g1292;g1365;g1398;g1462;g1464;g1499;g1500;g1691;g1717;g1761;g1881;g1890;g1911;g1948;g1991;g2013;g2028;g2067;g2206;g2249;g2270;g2318;g2376;g2473;g2661;g2679;g2781;g2864;g2929;g3094;g3183;g3208;g3310;g3356;g3375;g3384;g3393;g3396;g3407;g3411;g3427;g3428;g3447;g3456;g3486;g3537;g3696;g3831;g3875;g3882;g3898;g3902;g39…
271	GO:0051347	positive regulation of transferase activity	41 (4.56%)	216 (2.64%)	0.000308	0.009026	g496;g1008;g1600;g1881;g2067;g3117;g3384;g3537;g3701;g3938;g3952;g4805;g5651;g6018;g6032;g6285;g6327;g6899;g6982;g7635;g8607;g9994;g10128;g10638;g1255;g3202;g5026;g7686;g8068;g1256;g1849;g1955;g4341;g4739;g6204;g6308;g7939;g9203;g9995;g10390;g10649
272	GO:0009889	regulation of biosynthetic process	290 (32.22%)	2233 (27.3%)	0.000309	0.009026	g73;g103;g198;g294;g496;g579;g580;g719;g753;g789;g955;g1008;g1107;g1217;g1221;g1278;g1292;g1365;g1398;g1462;g1464;g1499;g1500;g1691;g1717;g1761;g1881;g1890;g1911;g1948;g1991;g2013;g2028;g2067;g2206;g2249;g2270;g2318;g2376;g2473;g2661;g2679;g2781;g2864;g2929;g3094;g3183;g3208;g3310;g3356;g3375;g3384;g3393;g3396;g3407;g3411;g3427;g3428;g3447;g3456;g3486;g3537;g3696;g3831;g3875;g3882;g3898;g3902;g39…
273	GO:0006913	nucleocytoplasmic transport	54 (6%)	308 (3.77%)	0.000312	0.009092	g1015;g1752;g1761;g1971;g2013;g2111;g2136;g3144;g3216;g3343;g3356;g3411;g3422;g3427;g3453;g3482;g3853;g4067;g4301;g4366;g4523;g4805;g5113;g5139;g5554;g5651;g5752;g6074;g6340;g6572;g6670;g6681;g6899;g6924;g6990;g7290;g7781;g8607;g8732;g9218;g10012;g10070;g10255;g10450;g588;g199;g654;g1291;g1309;g1985;g4807;g4829;g7940;g8064
274	GO:0007126	meiotic nuclear division	44 (4.89%)	237 (2.9%)	0.000314	0.009094	g728;g749;g789;g1493;g1588;g1716;g1742;g1889;g2388;g2534;g2929;g3335;g3410;g3422;g3537;g4174;g4738;g4805;g5621;g5622;g5650;g6284;g6899;g6919;g7877;g8008;g8065;g8362;g8654;g9167;g9206;g9612;g9793;g588;g2854;g1170;g1888;g3408;g5620;g7475;g8430;g8574;g8941;g10269
275	GO:0046578	regulation of Ras protein signal transduction	29 (3.22%)	136 (1.66%)	0.00032	0.009257	g527;g624;g710;g1991;g2013;g2249;g2670;g2733;g2967;g3429;g3800;g3909;g4301;g4805;g5375;g5862;g6015;g6982;g7315;g8229;g526;g7686;g1283;g2128;g6375;g6415;g6816;g6836;g7984
276	GO:0046856	phosphatidylinositol dephosphorylation	7 (0.78%)	14 (0.17%)	0.000326	0.009392	g765;g4952;g5651;g9173;g9820;g10104;g10601
277	GO:0046839	phospholipid dephosphorylation	8 (0.89%)	18 (0.22%)	0.000332	0.00952	g765;g4952;g5651;g5730;g9173;g9820;g10104;g10601
278	GO:0043604	amide biosynthetic process	131 (14.56%)	903 (11.04%)	0.000342	0.009768	g73;g95;g294;g655;g719;g1107;g1292;g1365;g1713;g1716;g1717;g1742;g1877;g1893;g2067;g2625;g2670;g2742;g2864;g3208;g3220;g3356;g3384;g3411;g3419;g3428;g3486;g3540;g3886;g3945;g3987;g4067;g4340;g4531;g4545;g4844;g4859;g4933;g4950;g4995;g5113;g5137;g5203;g5393;g5763;g5866;g5953;g5989;g6007;g6025;g6029;g6621;g6670;g6759;g6771;g6800;g6842;g6899;g6924;g6990;g7528;g7576;g8384;g8569;g8576;g8764;g8868;g887…
279	GO:0019219	regulation of nucleobase-containing compound metabolic process	270 (30%)	2066 (25.26%)	0.000369	0.010492	g73;g198;g496;g579;g580;g728;g753;g789;g945;g955;g1008;g1217;g1221;g1278;g1292;g1365;g1398;g1462;g1464;g1499;g1500;g1691;g1752;g1761;g1881;g1890;g1911;g1948;g1991;g2013;g2028;g2067;g2206;g2249;g2270;g2318;g2376;g2473;g2661;g2670;g2679;g2781;g2929;g3094;g3183;g3310;g3343;g3356;g3375;g3384;g3393;g3396;g3407;g3410;g3411;g3422;g3427;g3447;g3456;g3486;g3537;g3696;g3831;g3875;g3882;g3898;g3902;g3914;g3…
280	GO:0030951	establishment or maintenance of microtubule cytoskeleton polarity	11 (1.22%)	32 (0.39%)	0.000392	0.011121	g103;g2882;g3094;g3335;g4067;g4738;g5113;g7391;g7227;g9203;g9639
281	GO:0033674	positive regulation of kinase activity	34 (3.78%)	171 (2.09%)	0.00041	0.011597	g496;g1008;g1600;g1881;g2067;g3117;g3384;g3537;g3701;g3938;g3952;g4805;g6018;g6032;g6285;g6327;g6899;g6982;g7635;g9994;g10638;g1255;g3202;g5026;g7686;g1256;g1849;g4341;g4739;g6308;g7939;g9203;g9995;g10390
282	GO:0007033	vacuole organization	29 (3.22%)	138 (1.69%)	0.000415	0.011645	g63;g103;g615;g765;g1008;g2249;g2364;g2980;g3627;g4205;g4366;g4576;g4952;g5089;g5429;g6093;g6944;g7576;g7629;g8525;g8607;g8778;g10246;g10447;g1718;g3621;g6415;g7727;g8495
283	GO:0019439	aromatic compound catabolic process	79 (8.78%)	498 (6.09%)	0.000416	0.011645	g294;g719;g873;g1464;g1713;g1761;g1877;g2120;g2376;g3117;g3135;g3220;g3343;g3356;g3384;g3410;g3411;g3886;g3938;g3945;g4067;g4844;g4993;g5113;g5203;g5268;g5545;g5752;g5763;g6074;g6385;g6842;g6893;g6899;g7181;g7528;g7752;g7877;g8299;g8607;g8732;g9221;g9239;g9612;g9791;g10052;g10128;g10226;g10264;g10553;g1972;g3182;g3342;g5195;g8068;g8643;g594;g1218;g1336;g2109;g2853;g3462;g3628;g4478;g4739;g4849;g5…
284	GO:0000226	microtubule cytoskeleton organization	74 (8.22%)	460 (5.62%)	0.000416	0.011645	g63;g103;g308;g496;g618;g749;g753;g789;g1192;g1742;g1758;g2206;g2882;g2929;g3094;g3260;g3335;g3453;g3455;g3620;g3696;g3945;g4067;g4174;g4738;g4805;g5113;g5429;g5554;g5621;g5622;g6572;g6759;g6807;g7319;g7391;g7781;g8008;g8081;g8638;g8657;g8822;g9021;g9167;g9548;g9853;g10009;g10100;g10112;g10226;g10447;g10450;g588;g4974;g7227;g9123;g1169;g1888;g2538;g2782;g3621;g4169;g4481;g5620;g6416;g6770;g7015;g…
285	GO:0010564	regulation of cell cycle process	77 (8.56%)	483 (5.91%)	0.000423	0.011779	g103;g496;g618;g749;g789;g1008;g1192;g1493;g2067;g2929;g3335;g3375;g3384;g3407;g3410;g3453;g3456;g3537;g3831;g3945;g4680;g4738;g4805;g5356;g5651;g6029;g6170;g6203;g6572;g6780;g6839;g6842;g6899;g6919;g7087;g7781;g7866;g7877;g8065;g8362;g8657;g8972;g9173;g9206;g9254;g9612;g9791;g9853;g10112;g10553;g588;g1219;g1255;g2854;g3202;g5563;g6028;g6838;g1226;g1256;g1336;g1955;g2538;g3621;g4807;g5609;g5794;g…
286	GO:0051053	negative regulation of DNA metabolic process	28 (3.11%)	132 (1.61%)	0.000442	0.012217	g496;g728;g1464;g2929;g3310;g3407;g3422;g3486;g4433;g5275;g5467;g6074;g6170;g6621;g6842;g6919;g7748;g7877;g8065;g8362;g8607;g8727;g3202;g5563;g654;g6754;g7475;g10537
287	GO:0048588	developmental cell growth	33 (3.67%)	165 (2.02%)	0.000445	0.012217	g63;g527;g563;g1717;g2013;g2364;g3117;g3384;g3909;g3938;g4374;g4601;g5251;g5862;g6032;g6122;g6273;g6815;g6924;g7319;g8226;g8365;g8548;g9548;g9675;g10052;g588;g1555;g1955;g5335;g6308;g6719;g9203
288	GO:0048639	positive regulation of developmental growth	33 (3.67%)	165 (2.02%)	0.000445	0.012217	g527;g765;g1717;g2013;g2707;g3117;g3384;g3938;g5356;g6032;g6122;g6470;g6815;g6842;g6899;g7635;g7877;g8365;g8801;g9011;g9548;g10006;g10052;g10070;g10447;g5563;g1955;g3311;g3477;g4169;g4829;g7939;g10145
289	GO:1903311	regulation of mRNA metabolic process	33 (3.67%)	165 (2.02%)	0.000445	0.012217	g753;g945;g1752;g3343;g3356;g3384;g3411;g3456;g3938;g3945;g4696;g5139;g5268;g5626;g5752;g6842;g6899;g6924;g7304;g7877;g9218;g9612;g9791;g10128;g10226;g10255;g10264;g3140;g4478;g5674;g6917;g7940;g8080
290	GO:0048015	phosphatidylinositol-mediated signaling	14 (1.56%)	48 (0.59%)	0.000459	0.012585	g384;g765;g1398;g2013;g3800;g4576;g4584;g5651;g6303;g9167;g9820;g10246;g10601;g7727
291	GO:1901361	organic cyclic compound catabolic process	78 (8.67%)	492 (6.02%)	0.000461	0.012588	g294;g719;g873;g1464;g1713;g1761;g1877;g2376;g3117;g3135;g3220;g3343;g3356;g3384;g3410;g3411;g3886;g3938;g3945;g4067;g4993;g5113;g5203;g5268;g5545;g5752;g5763;g6074;g6385;g6842;g6893;g6899;g7181;g7752;g7877;g8299;g8607;g8732;g9221;g9239;g9612;g9791;g10052;g10128;g10226;g10264;g10553;g1972;g3182;g3342;g5195;g8068;g8643;g92;g594;g1218;g1336;g2109;g2853;g3462;g3628;g4478;g4739;g4849;g5674;g6042;g620…
292	GO:0002164	larval development	63 (7%)	379 (4.63%)	0.000463	0.012588	g384;g496;g1192;g1691;g1948;g2028;g2368;g2376;g2473;g2882;g3090;g3312;g3384;g3396;g3875;g3945;g4205;g4517;g4973;g5429;g5485;g5621;g5622;g5651;g6029;g6295;g6345;g6470;g6759;g6776;g6919;g7635;g7705;g7877;g7952;g8381;g8384;g8576;g8607;g8657;g9206;g9675;g10070;g10246;g7686;g1336;g2653;g3207;g4739;g4829;g5160;g5620;g6031;g6375;g6378;g6416;g6816;g6917;g7727;g7915;g9022;g9203;g10145
293	GO:0050790	regulation of catalytic activity	130 (14.44%)	902 (11.03%)	0.000477	0.012932	g496;g618;g710;g789;g929;g1008;g1380;g1554;g1600;g1881;g1935;g1965;g1991;g2013;g2028;g2067;g2206;g2368;g2670;g2865;g2882;g2967;g3090;g3117;g3312;g3384;g3407;g3445;g3455;g3537;g3701;g3800;g3831;g3938;g3945;g3952;g4433;g4523;g4557;g4680;g4805;g4842;g5356;g5375;g5651;g5747;g5752;g6015;g6018;g6032;g6074;g6170;g6203;g6285;g6327;g6379;g6572;g6755;g6800;g6815;g6899;g6982;g7087;g7319;g7391;g7635;g7781;g7…
294	GO:0045498	sex comb development	6 (0.67%)	11 (0.13%)	0.000495	0.013382	g1691;g1948;g4842;g4897;g5400;g8503
295	GO:0006278	RNA-dependent DNA replication	13 (1.44%)	43 (0.53%)	0.000497	0.013383	g1464;g1713;g1761;g6074;g6842;g8362;g1255;g8068;g1256;g4793;g6204;g10537;g10649
296	GO:0006379	mRNA cleavage	10 (1.11%)	28 (0.34%)	0.000508	0.013624	g1752;g2111;g2521;g2781;g3356;g6289;g8732;g7159;g7160;g7940
297	GO:0002181	cytoplasmic translation	34 (3.78%)	173 (2.12%)	0.000512	0.013705	g655;g719;g1365;g1742;g1877;g1893;g2067;g2742;g3384;g3428;g4340;g4933;g4995;g5203;g6007;g6771;g6899;g8576;g8764;g10052;g10378;g3342;g1218;g1291;g3901;g4953;g5196;g5785;g6378;g6923;g7612;g7728;g8767;g10462
298	GO:0031667	response to nutrient levels	70 (7.78%)	433 (5.29%)	0.000516	0.013757	g63;g103;g496;g765;g806;g807;g1008;g1217;g1221;g1365;g1691;g1881;g2005;g2067;g2120;g2206;g2249;g2295;g2742;g2763;g2929;g2980;g3090;g3117;g3281;g3384;g3455;g3627;g3882;g4205;g4340;g4576;g4680;g4993;g5089;g5429;g5467;g5651;g6032;g6093;g6899;g7319;g7629;g7877;g8117;g8525;g8607;g8778;g9254;g9994;g10006;g10246;g2635;g3141;g10173;g760;g1718;g2937;g4994;g5335;g5399;g5785;g7029;g7475;g7727;g8495;g9200;g9…
299	GO:0016569	covalent chromatin modification	56 (6.22%)	329 (4.02%)	0.000524	0.013929	g198;g579;g580;g2249;g2376;g2473;g2781;g2929;g3422;g3875;g3882;g3987;g4433;g4842;g4859;g5953;g6285;g6295;g6340;g6422;g6759;g6780;g6815;g6840;g6919;g7283;g7319;g7687;g7748;g8362;g8503;g8508;g8525;g8657;g8727;g8735;g9206;g9254;g9612;g9675;g9793;g10009;g10070;g10447;g10599;g5026;g1170;g1955;g2319;g2937;g4829;g4862;g5794;g7475;g8038;g9272
300	GO:0006518	peptide metabolic process	125 (13.89%)	864 (10.56%)	0.000531	0.014053	g73;g95;g294;g655;g719;g981;g1107;g1292;g1365;g1637;g1713;g1716;g1717;g1742;g1877;g1893;g2067;g2625;g2742;g2864;g3208;g3220;g3356;g3384;g3411;g3419;g3428;g3486;g3540;g3886;g3945;g3987;g4067;g4340;g4374;g4531;g4545;g4859;g4933;g4950;g4995;g5113;g5137;g5203;g5545;g5763;g5953;g5989;g6007;g6025;g6029;g6621;g6670;g6759;g6771;g6800;g6842;g6893;g6899;g6924;g6990;g7576;g8384;g8576;g8764;g8868;g8873;g9221…
301	GO:0043069	negative regulation of programmed cell death	55 (6.11%)	322 (3.94%)	0.000538	0.014172	g201;g294;g753;g1015;g1588;g1890;g2028;g2670;g3384;g3456;g3831;g4545;g4680;g4893;g4993;g5356;g5651;g5673;g5752;g6098;g6800;g6842;g7877;g8503;g8607;g8801;g8972;g9805;g10006;g10255;g10391;g1310;g3141;g5026;g5563;g1309;g1849;g1902;g1955;g2248;g3423;g3477;g3766;g4994;g5392;g6308;g6754;g7029;g8570;g8738;g9022;g9109;g9854;g10194;g10464
302	GO:0010639	negative regulation of organelle organization	46 (5.11%)	257 (3.14%)	0.000539	0.014172	g496;g618;g789;g1462;g1464;g1499;g1500;g2929;g3260;g3422;g3537;g3725;g3945;g4433;g4531;g4993;g6032;g6074;g6284;g6572;g6780;g6842;g6919;g7319;g8065;g8362;g8657;g9206;g10070;g2854;g3203;g5026;g654;g1955;g2538;g4169;g4329;g4994;g7475;g7939;g8495;g8570;g8574;g8941;g9807;g10537
303	GO:0034655	nucleobase-containing compound catabolic process	63 (7%)	382 (4.67%)	0.000574	0.015	g294;g719;g873;g1464;g1713;g1761;g1877;g2376;g3117;g3220;g3343;g3356;g3384;g3410;g3411;g3886;g3938;g3945;g4067;g4993;g5113;g5203;g5268;g5752;g5763;g6074;g6385;g6842;g6899;g7752;g7877;g8299;g8607;g8732;g9221;g9239;g9612;g9791;g10052;g10128;g10226;g10264;g10553;g3342;g5195;g8068;g1218;g1336;g2853;g3462;g4478;g4739;g5674;g6042;g6204;g6754;g6923;g7728;g8064;g8080;g8767;g10462;g10537
304	GO:0006259	DNA metabolic process	151 (16.78%)	1077 (13.17%)	0.000575	0.015	g198;g201;g294;g496;g657;g728;g749;g1278;g1464;g1500;g1588;g1713;g1761;g1889;g1911;g1964;g2028;g2679;g2781;g2858;g2929;g3074;g3125;g3310;g3384;g3407;g3411;g3419;g3422;g3427;g3486;g3537;g3564;g3831;g3987;g4174;g4374;g4427;g4433;g4523;g4557;g4805;g4893;g5027;g5137;g5275;g5356;g5467;g5621;g5622;g5650;g5818;g6018;g6074;g6170;g6203;g6284;g6295;g6340;g6356;g6509;g6621;g6670;g6759;g6815;g6842;g6899;g691…
305	GO:0001932	regulation of protein phosphorylation	74 (8.22%)	465 (5.69%)	0.000576	0.015	g496;g1192;g1278;g1380;g1600;g1637;g1881;g1890;g1935;g2013;g2028;g2067;g2670;g2865;g2882;g3117;g3384;g3407;g3537;g3701;g3800;g3938;g3952;g4805;g5651;g5747;g6018;g6032;g6170;g6285;g6327;g6379;g6899;g6982;g7319;g7635;g7877;g8496;g8657;g8801;g9805;g9820;g9994;g10070;g10553;g10638;g1255;g2854;g3202;g5026;g5563;g7686;g1256;g1849;g1955;g2698;g3311;g4169;g4329;g4341;g4739;g4807;g5335;g5785;g6308;g6378;g…
306	GO:0007032	endosome organization	14 (1.56%)	49 (0.6%)	0.000579	0.015036	g509;g765;g806;g3455;g4205;g6982;g7079;g8496;g8525;g8778;g10447;g3621;g5616;g6770
307	GO:0046822	regulation of nucleocytoplasmic transport	22 (2.44%)	96 (1.17%)	0.00059	0.015257	g1752;g2013;g3144;g3422;g3453;g4301;g4805;g5651;g5752;g6572;g6670;g6899;g7290;g7781;g8732;g9218;g10070;g10255;g588;g654;g1985;g4807
308	GO:0002119	nematode larval development	48 (5.33%)	273 (3.34%)	0.000622	0.016049	g384;g496;g1192;g1948;g2028;g2368;g2376;g3312;g3384;g3396;g3945;g4205;g4517;g5429;g5621;g5622;g5651;g6029;g6295;g6470;g6759;g6776;g7635;g7705;g7877;g7952;g8381;g8384;g8607;g8657;g9206;g9675;g10070;g10246;g7686;g2653;g4739;g4829;g5620;g6031;g6375;g6378;g6416;g6816;g7727;g7915;g9203;g10145
309	GO:0060968	regulation of gene silencing	24 (2.67%)	109 (1.33%)	0.000631	0.016208	g789;g1278;g1462;g1499;g1500;g3831;g4415;g4517;g4531;g5862;g5953;g6776;g7866;g8873;g9206;g10264;g3202;g6066;g1955;g5674;g6067;g7475;g8574;g8941
310	GO:0051179	localization	438 (48.67%)	3564 (43.58%)	0.000647	0.016568	g63;g69;g103;g201;g294;g384;g496;g509;g618;g657;g699;g710;g749;g757;g765;g771;g789;g806;g829;g932;g955;g981;g1008;g1015;g1107;g1192;g1217;g1221;g1335;g1398;g1493;g1495;g1500;g1554;g1588;g1600;g1631;g1691;g1716;g1742;g1752;g1758;g1761;g1794;g1819;g1845;g1877;g1878;g1881;g1903;g1935;g1938;g1965;g1971;g2004;g2013;g2028;g2067;g2111;g2136;g2206;g2249;g2270;g2295;g2364;g2368;g2388;g2623;g2670;g2693;g27…
311	GO:0071103	DNA conformation change	77 (8.56%)	490 (5.99%)	0.000656	0.016743	g73;g294;g316;g522;g728;g749;g1192;g1278;g1499;g1500;g1600;g2368;g2376;g2392;g2661;g2858;g2976;g3094;g3125;g3335;g3445;g3453;g3853;g4215;g4316;g4523;g4557;g4565;g5137;g5871;g6018;g6284;g6327;g6509;g6523;g6572;g6621;g6755;g6759;g6780;g6807;g6870;g7866;g7949;g8065;g8362;g8384;g8390;g8503;g8548;g8568;g8576;g8657;g8735;g8822;g9011;g9113;g9218;g9793;g10226;g10450;g3887;g7227;g7979;g1048;g1987;g3207;g3…
312	GO:0010506	regulation of autophagy	36 (4%)	189 (2.31%)	0.000658	0.016743	g63;g496;g580;g765;g1221;g1717;g2249;g2295;g2763;g2980;g3312;g3384;g3627;g4576;g4680;g4993;g5429;g5651;g5862;g6032;g6720;g6752;g6899;g7319;g7572;g7629;g10246;g3141;g10173;g1718;g2937;g4739;g4994;g7475;g8495;g9203
313	GO:0044765	single-organism transport	329 (36.56%)	2597 (31.76%)	0.000664	0.016852	g63;g69;g103;g201;g384;g496;g509;g657;g699;g749;g765;g806;g829;g932;g981;g1008;g1015;g1107;g1192;g1217;g1335;g1398;g1495;g1500;g1554;g1600;g1691;g1716;g1761;g1794;g1819;g1845;g1877;g1878;g1881;g1903;g1935;g1938;g1965;g1971;g2004;g2013;g2111;g2136;g2206;g2249;g2270;g2295;g2364;g2368;g2388;g2623;g2670;g2693;g2711;g2742;g2763;g2882;g2967;g2980;g3094;g3144;g3216;g3260;g3310;g3312;g3335;g3339;g3343;g3…
314	GO:0010571	positive regulation of nuclear cell cycle DNA replication	5 (0.56%)	8 (0.1%)	0.000672	0.016952	g3537;g8362;g8657;g3202;g8941
315	GO:0060903	positive regulation of meiosis I	5 (0.56%)	8 (0.1%)	0.000672	0.016952	g3410;g3537;g6899;g9612;g8941
316	GO:0043549	regulation of kinase activity	51 (5.67%)	296 (3.62%)	0.000691	0.017377	g496;g1008;g1380;g1600;g1881;g2013;g2028;g2067;g2882;g3117;g3384;g3407;g3537;g3701;g3800;g3938;g3952;g4805;g5651;g5747;g6018;g6032;g6170;g6285;g6327;g6379;g6899;g6982;g7635;g8496;g9994;g10270;g10638;g1255;g3202;g5026;g7686;g1256;g1849;g4341;g4739;g4807;g5785;g6308;g6378;g6754;g6816;g7939;g9203;g9995;g10390
317	GO:0009991	response to extracellular stimulus	72 (8%)	453 (5.54%)	0.000708	0.01773	g63;g103;g496;g765;g806;g807;g1008;g1217;g1221;g1365;g1691;g1881;g2005;g2067;g2120;g2206;g2249;g2295;g2742;g2763;g2929;g2980;g3090;g3117;g3281;g3384;g3455;g3627;g3882;g4205;g4340;g4427;g4576;g4680;g4993;g5089;g5429;g5467;g5651;g6032;g6093;g6899;g7319;g7629;g7877;g8117;g8525;g8607;g8778;g8942;g9254;g9994;g10006;g10246;g2635;g3141;g10173;g760;g1718;g2937;g4994;g5335;g5399;g5785;g7029;g7475;g7727;g8…
318	GO:0007559	histolysis	14 (1.56%)	50 (0.61%)	0.000725	0.018041	g1008;g1480;g1948;g2295;g2882;g3384;g4576;g5651;g5763;g7635;g8508;g9779;g10246;g8606
319	GO:0016271	tissue death	14 (1.56%)	50 (0.61%)	0.000725	0.018041	g1008;g1480;g1948;g2295;g2882;g3384;g4576;g5651;g5763;g7635;g8508;g9779;g10246;g8606
320	GO:0021700	developmental maturation	52 (5.78%)	304 (3.72%)	0.000731	0.018146	g63;g103;g749;g1008;g1192;g2013;g2295;g2882;g2929;g3094;g3312;g3384;g3396;g3444;g3455;g3529;g4067;g4174;g4601;g4738;g5113;g5485;g5651;g6025;g6470;g6899;g6924;g7087;g7391;g8008;g8496;g8638;g8778;g9011;g9021;g9231;g9779;g9994;g10226;g10650;g1288;g7227;g521;g1287;g3766;g4841;g6415;g9022;g9203;g9957;g9995;g10153
321	GO:0034504	protein localization to nucleus	40 (4.44%)	218 (2.67%)	0.000738	0.018258	g1015;g2013;g2136;g3422;g3427;g3453;g3455;g3853;g4301;g4366;g4523;g4805;g5139;g5275;g5554;g5621;g5622;g5651;g5752;g6572;g6681;g6800;g6899;g7290;g7629;g7781;g8638;g10070;g10255;g10447;g10450;g588;g199;g654;g1955;g1985;g4807;g5620;g7727;g9203
322	GO:0051253	negative regulation of RNA metabolic process	107 (11.89%)	727 (8.89%)	0.000746	0.018414	g73;g198;g579;g580;g789;g1217;g1221;g1278;g1462;g1499;g1500;g1691;g1890;g2028;g2376;g2661;g2781;g3094;g3375;g3384;g3393;g3410;g3411;g3427;g3696;g3831;g3882;g3945;g4067;g4138;g4374;g4517;g4531;g4545;g4557;g4565;g4842;g5356;g5393;g5485;g5626;g5752;g6128;g6284;g6285;g6766;g6780;g6800;g6840;g6899;g6919;g7283;g7290;g7319;g7748;g7866;g7877;g8065;g8301;g8503;g8657;g8727;g8789;g8873;g8972;g9011;g9206;g92…
323	GO:0048284	organelle fusion	32 (3.56%)	163 (1.99%)	0.000755	0.018559	g69;g615;g657;g749;g1716;g2249;g2364;g3312;g3335;g3339;g3478;g4738;g5089;g6007;g6032;g6093;g6842;g6944;g7629;g8525;g8607;g8778;g10270;g591;g1169;g1632;g3423;g3621;g5609;g6770;g7727;g8495
324	GO:0051049	regulation of transport	98 (10.89%)	657 (8.03%)	0.000799	0.019589	g63;g103;g384;g496;g749;g765;g806;g1217;g1335;g1631;g1752;g1794;g1878;g1965;g2013;g2206;g2295;g2368;g2670;g2763;g2882;g2980;g3144;g3312;g3339;g3384;g3422;g3453;g3455;g3478;g3511;g3875;g3902;g4205;g4301;g4584;g4805;g4989;g5089;g5356;g5375;g5485;g5650;g5651;g5730;g5752;g6032;g6295;g6470;g6572;g6670;g6752;g6815;g6899;g7290;g7391;g7490;g7781;g7850;g8229;g8496;g8525;g8548;g8732;g8778;g9021;g9198;g9218…
325	GO:0046824	positive regulation of nucleocytoplasmic transport	13 (1.44%)	45 (0.55%)	0.000805	0.019681	g1752;g3144;g3422;g4805;g5651;g5752;g6899;g7781;g9218;g10070;g588;g654;g4807
326	GO:0006289	nucleotide-excision repair	39 (4.33%)	212 (2.59%)	0.000812	0.019734	g294;g728;g1588;g1713;g1964;g2929;g3125;g3407;g3419;g3486;g4427;g4893;g5275;g5467;g5818;g6018;g6621;g6670;g7028;g7866;g8525;g8568;g8873;g9230;g10227;g10255;g10599;g3420;g3887;g4732;g6028;g654;g1835;g2579;g4317;g4739;g4953;g6917;g9022
327	GO:0019220	regulation of phosphate metabolic process	93 (10.33%)	618 (7.56%)	0.000815	0.019734	g496;g1008;g1192;g1221;g1278;g1380;g1600;g1637;g1761;g1881;g1890;g1935;g2013;g2028;g2067;g2670;g2865;g2882;g3117;g3384;g3407;g3482;g3537;g3701;g3800;g3938;g3952;g4805;g5651;g5747;g6018;g6032;g6074;g6170;g6285;g6327;g6379;g6681;g6755;g6899;g6982;g7319;g7635;g7877;g8496;g8607;g8654;g8657;g8801;g9805;g9820;g9994;g10070;g10255;g10270;g10553;g10638;g1255;g2854;g3202;g5026;g5563;g7686;g654;g1256;g1336;…
328	GO:0051174	regulation of phosphorus metabolic process	93 (10.33%)	618 (7.56%)	0.000815	0.019734	g496;g1008;g1192;g1221;g1278;g1380;g1600;g1637;g1761;g1881;g1890;g1935;g2013;g2028;g2067;g2670;g2865;g2882;g3117;g3384;g3407;g3482;g3537;g3701;g3800;g3938;g3952;g4805;g5651;g5747;g6018;g6032;g6074;g6170;g6285;g6327;g6379;g6681;g6755;g6899;g6982;g7319;g7635;g7877;g8496;g8607;g8654;g8657;g8801;g9805;g9820;g9994;g10070;g10255;g10270;g10553;g10638;g1255;g2854;g3202;g5026;g5563;g7686;g654;g1256;g1336;…
329	GO:0009725	response to hormone	71 (7.89%)	448 (5.48%)	0.000835	0.02017	g749;g1278;g1365;g1398;g1948;g2013;g2206;g2270;g2670;g2882;g2929;g3339;g3356;g3384;g3411;g3422;g3696;g3800;g3882;g3945;g4340;g4531;g4552;g5400;g5467;g5651;g6170;g6284;g6295;g6681;g6780;g6842;g6919;g7319;g7635;g7705;g7781;g7877;g8117;g8508;g8801;g9675;g9791;g10006;g10128;g10226;g10553;g1972;g2635;g3202;g5195;g5471;g5563;g6028;g9123;g10173;g654;g760;g1054;g1337;g1718;g2853;g3477;g4369;g4739;g6378;g…
330	GO:0051252	regulation of RNA metabolic process	251 (27.89%)	1928 (23.58%)	0.000838	0.020174	g73;g198;g496;g579;g580;g753;g789;g945;g955;g1008;g1217;g1221;g1278;g1292;g1365;g1398;g1462;g1499;g1500;g1691;g1752;g1761;g1881;g1890;g1911;g1948;g1991;g2028;g2067;g2206;g2249;g2270;g2318;g2376;g2473;g2661;g2670;g2679;g2781;g2929;g3094;g3183;g3343;g3356;g3375;g3384;g3393;g3396;g3407;g3410;g3411;g3427;g3447;g3456;g3696;g3831;g3875;g3882;g3898;g3902;g3914;g3938;g3945;g3952;g3987;g4067;g4138;g4366;g…
331	GO:0060548	negative regulation of cell death	62 (6.89%)	380 (4.65%)	0.000841	0.020174	g63;g201;g294;g753;g1015;g1588;g1890;g2028;g2295;g2670;g3384;g3456;g3831;g4417;g4545;g4680;g4893;g4993;g5275;g5356;g5651;g5673;g5752;g6098;g6755;g6800;g6842;g7877;g8503;g8607;g8801;g8972;g9805;g10006;g10070;g10255;g10391;g1310;g3141;g5026;g5563;g1309;g1849;g1902;g1955;g2248;g3423;g3477;g3628;g3766;g4994;g5392;g6308;g6754;g7029;g8570;g8738;g9022;g9109;g9854;g10194;g10464
332	GO:0000956	nuclear-transcribed mRNA catabolic process	33 (3.67%)	171 (2.09%)	0.000859	0.020548	g294;g719;g873;g1464;g1761;g1877;g3343;g3356;g3410;g3411;g3945;g4067;g5113;g5203;g6074;g6842;g8299;g8732;g9612;g9791;g10052;g10264;g10553;g3342;g1218;g2853;g5674;g6923;g7728;g8064;g8767;g10462;g10537
333	GO:0030866	cortical actin cytoskeleton organization	19 (2.11%)	80 (0.98%)	0.000861	0.020549	g103;g201;g384;g1192;g1493;g1631;g2249;g3725;g4805;g5730;g6303;g9167;g9173;g10447;g1888;g4169;g4329;g6308;g7939
334	GO:0006323	DNA packaging	63 (7%)	388 (4.74%)	0.000869	0.020628	g316;g522;g749;g1192;g1278;g1499;g1500;g1600;g2368;g2376;g2392;g2661;g2976;g3094;g3335;g3445;g3453;g3853;g4215;g4316;g4523;g4557;g4565;g5871;g6284;g6327;g6523;g6572;g6755;g6759;g6780;g6807;g6870;g7866;g7949;g8065;g8362;g8390;g8548;g8568;g8576;g8657;g8735;g8822;g9113;g9218;g9793;g10226;g10450;g7227;g7979;g1048;g1987;g3207;g3408;g3621;g4739;g6375;g7475;g8430;g8574;g9639;g10302
335	GO:0032101	regulation of response to external stimulus	61 (6.78%)	373 (4.56%)	0.00087	0.020628	g63;g73;g294;g496;g765;g1008;g1221;g1935;g2249;g2742;g2763;g2980;g3117;g3125;g3384;g3627;g3909;g3938;g4415;g4680;g4993;g5356;g5429;g5651;g5763;g6032;g6122;g6759;g6899;g7319;g7629;g8365;g8384;g8548;g9021;g9548;g9820;g9994;g10246;g1219;g3141;g7795;g10173;g654;g1718;g1902;g2937;g3477;g3746;g4739;g4994;g5419;g5616;g5785;g6770;g7475;g8495;g8993;g9067;g9203;g9995
336	GO:0007004	telomere maintenance via telomerase	12 (1.33%)	40 (0.49%)	0.000878	0.020745	g1464;g1761;g6074;g6842;g8362;g1255;g8068;g1256;g4793;g6204;g10537;g10649
337	GO:0000209	protein polyubiquitination	27 (3%)	131 (1.6%)	0.000886	0.020888	g496;g502;g1398;g2680;g2781;g2980;g3422;g3882;g4433;g4517;g4545;g4552;g4680;g5132;g6098;g6340;g6815;g7028;g7319;g7748;g7951;g9853;g10255;g594;g1226;g1835;g8738
338	GO:1902275	regulation of chromatin organization	30 (3.33%)	151 (1.85%)	0.00089	0.020924	g789;g1278;g1462;g1499;g1500;g2376;g2661;g3422;g3831;g4433;g4531;g4557;g6919;g7283;g7866;g8657;g8727;g9206;g9218;g9612;g9675;g10070;g10447;g3202;g5026;g6066;g1955;g6067;g7475;g8941
339	GO:0006139	nucleobase-containing compound metabolic process	449 (49.89%)	3675 (44.94%)	0.000893	0.020925	g41;g73;g198;g201;g294;g496;g497;g579;g580;g657;g710;g719;g728;g749;g753;g765;g789;g829;g873;g945;g955;g1008;g1217;g1221;g1278;g1292;g1365;g1398;g1462;g1464;g1499;g1500;g1524;g1588;g1691;g1713;g1752;g1758;g1761;g1819;g1877;g1881;g1889;g1890;g1911;g1938;g1948;g1964;g1991;g2004;g2013;g2028;g2050;g2067;g2111;g2206;g2249;g2251;g2270;g2318;g2376;g2473;g2521;g2661;g2670;g2679;g2742;g2781;g2858;g2864;g2…
340	GO:0033522	histone H2A ubiquitination	6 (0.67%)	12 (0.15%)	0.000899	0.020996	g2473;g2781;g3422;g4433;g7748;g8503
341	GO:0016325	oocyte microtubule cytoskeleton organization	9 (1%)	25 (0.31%)	0.000906	0.021111	g103;g2882;g3094;g4067;g4738;g5113;g7391;g7227;g9203
342	GO:0008360	regulation of cell shape	22 (2.44%)	99 (1.21%)	0.000918	0.02131	g1192;g1631;g1758;g2670;g2882;g3094;g3117;g3529;g3952;g4805;g5651;g6511;g9198;g10112;g10564;g7686;g760;g1309;g5335;g6308;g8606;g8941
343	GO:0044802	single-organism membrane organization	97 (10.78%)	652 (7.97%)	0.000929	0.02151	g69;g103;g615;g657;g1493;g1554;g1588;g1716;g1877;g2004;g2028;g2249;g2364;g2388;g2623;g2693;g3312;g3339;g3411;g3455;g3478;g3725;g4205;g4226;g4576;g5089;g5126;g5132;g5203;g5356;g5375;g5554;g5621;g5622;g5651;g5747;g5752;g5984;g6007;g6032;g6093;g6295;g6303;g6523;g6621;g6681;g6752;g6813;g6944;g7391;g7629;g7705;g8196;g8381;g8496;g8525;g8548;g8607;g8638;g8766;g8778;g9198;g9805;g10006;g10052;g10246;g1026…
344	GO:1903308	regulation of chromatin modification	29 (3.22%)	145 (1.77%)	0.000965	0.022281	g789;g1278;g1462;g1499;g1500;g2661;g3422;g3831;g4433;g4531;g4557;g6919;g7283;g7866;g8657;g8727;g9206;g9218;g9612;g9675;g10070;g10447;g3202;g5026;g6066;g1955;g6067;g7475;g8941
345	GO:0006793	phosphorus metabolic process	217 (24.11%)	1643 (20.09%)	0.000996	0.022921	g63;g99;g384;g496;g514;g527;g563;g710;g765;g789;g829;g932;g1008;g1107;g1192;g1221;g1278;g1362;g1380;g1600;g1637;g1761;g1881;g1890;g1935;g2004;g2013;g2028;g2067;g2368;g2625;g2670;g2723;g2865;g2882;g3074;g3117;g3281;g3318;g3344;g3377;g3384;g3407;g3419;g3455;g3456;g3482;g3486;g3537;g3564;g3701;g3800;g3882;g3909;g3938;g3952;g4301;g4592;g4680;g4805;g4844;g4897;g4952;g4989;g5025;g5268;g5467;g5608;g5651…
346	GO:0016241	regulation of macroautophagy	23 (2.56%)	106 (1.3%)	0.001004	0.023056	g63;g496;g765;g1221;g2249;g2763;g2980;g3384;g3627;g4680;g4993;g5429;g6032;g6899;g7319;g7629;g3141;g10173;g1718;g2937;g4994;g7475;g8495
347	GO:0030174	regulation of DNA-dependent DNA replication initiation	13 (1.44%)	46 (0.56%)	0.001011	0.023153	g198;g3310;g3486;g3537;g5467;g6621;g6919;g8362;g8607;g8727;g3202;g7475;g8567
348	GO:0032465	regulation of cytokinesis	14 (1.56%)	52 (0.64%)	0.001109	0.025176	g1008;g1192;g1493;g2929;g4680;g4805;g6029;g6839;g9173;g3202;g6838;g1955;g7984;g9203
349	GO:0060033	anatomical structure regression	14 (1.56%)	52 (0.64%)	0.001109	0.025176	g1008;g1480;g1948;g2295;g2882;g3384;g4576;g5651;g5763;g7635;g8508;g9779;g10246;g8606
350	GO:0044270	cellular nitrogen compound catabolic process	67 (7.44%)	422 (5.16%)	0.001109	0.025176	g294;g719;g873;g1464;g1713;g1761;g1877;g2376;g3117;g3220;g3343;g3356;g3384;g3410;g3411;g3886;g3938;g3945;g4067;g4993;g5113;g5203;g5268;g5752;g5763;g6074;g6385;g6842;g6893;g6899;g7181;g7752;g7877;g8299;g8607;g8732;g9221;g9239;g9612;g9791;g10052;g10128;g10226;g10264;g10553;g3342;g5195;g8068;g1218;g1336;g2853;g3462;g4478;g4739;g5674;g6042;g6204;g6754;g6923;g7728;g8064;g8080;g8767;g8993;g9995;g10462;…
351	GO:0009058	biosynthetic process	484 (53.78%)	4001 (48.92%)	0.001134	0.02566	g69;g73;g95;g103;g175;g198;g213;g294;g384;g496;g579;g580;g624;g655;g710;g719;g728;g753;g765;g789;g807;g829;g955;g1008;g1088;g1107;g1217;g1221;g1278;g1292;g1365;g1380;g1398;g1462;g1464;g1499;g1500;g1691;g1713;g1716;g1717;g1742;g1761;g1877;g1881;g1890;g1893;g1911;g1935;g1938;g1948;g1991;g2004;g2013;g2025;g2028;g2067;g2111;g2206;g2249;g2251;g2270;g2318;g2376;g2473;g2521;g2623;g2625;g2661;g2670;g2679…
352	GO:0060631	regulation of meiosis I	8 (0.89%)	21 (0.26%)	0.001142	0.025772	g3410;g3537;g6899;g6919;g8065;g9612;g7475;g8941
353	GO:0007167	enzyme linked receptor protein signaling pathway	69 (7.67%)	438 (5.36%)	0.001162	0.026144	g496;g563;g1015;g1380;g1398;g1935;g1948;g1991;g2670;g2707;g2724;g2882;g3339;g3344;g3356;g3384;g3396;g3455;g3696;g3701;g3800;g4374;g4552;g4601;g4993;g5429;g5485;g5651;g5793;g6093;g6122;g6289;g6470;g6899;g7705;g7809;g7949;g7951;g8117;g8365;g8496;g8732;g8801;g8873;g9254;g9318;g9612;g10070;g10104;g10226;g10553;g526;g1310;g9123;g10173;g654;g1265;g1337;g1718;g1835;g1849;g1955;g3311;g3423;g3477;g4994;g7…
354	GO:0008589	regulation of smoothened signaling pathway	16 (1.78%)	64 (0.78%)	0.001207	0.027072	g3281;g3422;g3447;g5393;g5429;g6098;g6122;g7705;g7809;g7949;g7951;g9218;g10112;g6416;g7475;g10031
355	GO:0032147	activation of protein kinase activity	24 (2.67%)	114 (1.39%)	0.001232	0.027576	g1600;g1881;g2067;g3117;g3384;g3537;g3701;g3938;g4805;g6018;g6032;g6899;g6982;g7635;g9994;g10638;g7686;g1849;g4341;g4739;g7939;g9203;g9995;g10390
356	GO:0042710	biofilm formation	13 (1.44%)	47 (0.57%)	0.00126	0.028086	g175;g201;g873;g1691;g2711;g5429;g8640;g9033;g9167;g9254;g3451;g6359;g1194
357	GO:1904356	regulation of telomere maintenance via telomere lengthening	10 (1.11%)	31 (0.38%)	0.001262	0.028086	g1464;g1761;g6074;g6842;g8362;g8068;g654;g6204;g10537;g10649
358	GO:0051054	positive regulation of DNA metabolic process	27 (3%)	134 (1.64%)	0.001268	0.028132	g3407;g3537;g4374;g5356;g6295;g6899;g7748;g7877;g8362;g8607;g8657;g8727;g9206;g9254;g9793;g10128;g10447;g10599;g3202;g8068;g654;g4739;g5794;g6204;g8941;g10145;g10649
359	GO:0051302	regulation of cell division	51 (5.67%)	304 (3.72%)	0.00128	0.02833	g496;g618;g749;g789;g1008;g1192;g1493;g2929;g3335;g3375;g3410;g3453;g3456;g3537;g4680;g4805;g5627;g6029;g6170;g6203;g6572;g6839;g6899;g6919;g7781;g8065;g8081;g8362;g8657;g8942;g9173;g9206;g9612;g9853;g588;g1219;g2854;g3202;g6838;g1226;g1955;g2538;g3621;g4807;g5168;g7475;g7727;g7984;g8430;g8941;g9203
360	GO:0051338	regulation of transferase activity	63 (7%)	394 (4.82%)	0.001294	0.028452	g496;g618;g789;g1008;g1380;g1600;g1881;g2013;g2028;g2067;g2882;g3117;g3384;g3407;g3537;g3701;g3800;g3938;g3952;g4433;g4805;g5651;g5747;g6018;g6032;g6074;g6170;g6285;g6327;g6379;g6572;g6899;g6982;g7087;g7635;g8496;g8607;g9994;g10128;g10270;g10638;g1255;g3202;g5026;g7686;g8068;g1256;g1849;g1955;g4341;g4739;g4807;g5785;g6204;g6308;g6378;g6754;g6816;g7939;g9203;g9995;g10390;g10649
361	GO:0000454	snoRNA guided rRNA pseudouridine synthesis	3 (0.33%)	3 (0.04%)	0.001329	0.028452	g8068;g4793;g6204
362	GO:0003348	cardiac endothelial cell differentiation	3 (0.33%)	3 (0.04%)	0.001329	0.028452	g1462;g8801;g10070
363	GO:0021814	cell motility involved in cerebral cortex radial glia guided migration	3 (0.33%)	3 (0.04%)	0.001329	0.028452	g5621;g5622;g5620
364	GO:0021815	modulation of microtubule cytoskeleton involved in cerebral cortex radial glia guided migration	3 (0.33%)	3 (0.04%)	0.001329	0.028452	g5621;g5622;g5620
365	GO:0021817	nucleokinesis involved in cell motility in cerebral cortex radial glia guided migration	3 (0.33%)	3 (0.04%)	0.001329	0.028452	g5621;g5622;g5620
366	GO:0043578	nuclear matrix organization	3 (0.33%)	3 (0.04%)	0.001329	0.028452	g5621;g5622;g5620
367	GO:0070452	positive regulation of ergosterol biosynthetic process	3 (0.33%)	3 (0.04%)	0.001329	0.028452	g1221;g6681;g9022
368	GO:0072765	centromere localization	3 (0.33%)	3 (0.04%)	0.001329	0.028452	g5621;g5622;g5620
369	GO:0072766	centromere clustering at the nuclear envelope	3 (0.33%)	3 (0.04%)	0.001329	0.028452	g5621;g5622;g5620
370	GO:0090292	nuclear matrix anchoring at nuclear membrane	3 (0.33%)	3 (0.04%)	0.001329	0.028452	g5621;g5622;g5620
371	GO:0098653	centromere clustering	3 (0.33%)	3 (0.04%)	0.001329	0.028452	g5621;g5622;g5620
372	GO:0051056	regulation of small GTPase mediated signal transduction	30 (3.33%)	155 (1.9%)	0.00138	0.029463	g527;g624;g710;g1991;g2013;g2249;g2670;g2733;g2967;g3429;g3800;g3909;g4301;g4805;g5375;g5466;g5862;g6015;g6982;g7315;g8229;g526;g7686;g1283;g2128;g6375;g6415;g6816;g6836;g7984
373	GO:1901576	organic substance biosynthetic process	475 (52.78%)	3927 (48.02%)	0.001384	0.029463	g69;g73;g95;g103;g175;g198;g213;g294;g384;g496;g579;g580;g624;g655;g710;g719;g728;g753;g765;g789;g807;g829;g955;g1008;g1088;g1107;g1217;g1221;g1278;g1292;g1365;g1380;g1398;g1462;g1464;g1499;g1500;g1691;g1713;g1716;g1717;g1742;g1761;g1877;g1881;g1890;g1893;g1911;g1935;g1938;g1948;g1991;g2004;g2013;g2025;g2028;g2067;g2111;g2206;g2249;g2251;g2270;g2318;g2376;g2473;g2521;g2623;g2625;g2661;g2670;g2679…
374	GO:0016050	vesicle organization	39 (4.33%)	218 (2.67%)	0.001403	0.029805	g69;g103;g509;g765;g806;g1554;g1716;g2364;g2980;g3312;g3339;g3455;g3478;g4205;g4584;g5089;g5862;g5984;g6681;g6982;g7079;g8496;g8525;g8778;g9021;g9198;g10226;g10261;g10447;g1255;g4974;g591;g1169;g1256;g1888;g3621;g5609;g5616;g6770
375	GO:0010833	telomere maintenance via telomere lengthening	15 (1.67%)	59 (0.72%)	0.001415	0.029974	g1464;g1713;g1761;g3411;g6074;g6842;g8362;g1255;g8068;g654;g1256;g4793;g6204;g10537;g10649
376	GO:0032879	regulation of localization	145 (16.11%)	1051 (12.85%)	0.001493	0.031542	g63;g103;g384;g496;g749;g765;g789;g806;g932;g1192;g1217;g1221;g1335;g1631;g1752;g1794;g1878;g1965;g2013;g2206;g2295;g2368;g2388;g2670;g2693;g2763;g2882;g2980;g3094;g3144;g3310;g3312;g3339;g3384;g3422;g3444;g3453;g3455;g3478;g3511;g3800;g3875;g3902;g3909;g3938;g4205;g4301;g4584;g4805;g4989;g5089;g5132;g5356;g5375;g5485;g5621;g5622;g5650;g5651;g5730;g5752;g5862;g6032;g6122;g6295;g6470;g6511;g6565;g…
377	GO:0048638	regulation of developmental growth	57 (6.33%)	351 (4.29%)	0.001507	0.031747	g527;g657;g710;g719;g765;g1192;g1221;g1398;g1717;g2013;g2707;g3117;g3384;g3898;g3909;g3938;g4792;g5251;g5356;g5485;g5651;g5862;g6032;g6093;g6122;g6170;g6303;g6470;g6759;g6815;g6842;g6899;g7635;g7877;g8365;g8390;g8548;g8801;g9011;g9548;g10006;g10052;g10070;g10226;g10447;g5563;g1555;g1955;g3311;g3477;g3894;g4169;g4829;g7939;g8430;g8738;g10145
378	GO:2000780	negative regulation of double-strand break repair	6 (0.67%)	13 (0.16%)	0.001515	0.031827	g3407;g3422;g4433;g7748;g7877;g8727
379	GO:0042327	positive regulation of phosphorylation	50 (5.56%)	299 (3.66%)	0.001528	0.03203	g496;g1008;g1278;g1600;g1881;g2067;g2670;g3117;g3384;g3537;g3701;g3938;g3952;g4805;g5651;g6018;g6032;g6285;g6327;g6899;g6982;g7319;g7635;g7877;g8607;g8801;g9805;g9994;g10070;g10553;g10638;g1255;g2854;g3202;g5026;g7686;g1256;g1337;g1849;g1955;g2698;g3311;g4341;g4739;g6308;g7939;g7984;g9203;g9995;g10390
380	GO:0051168	nuclear export	32 (3.56%)	170 (2.08%)	0.001571	0.032838	g1015;g1752;g1761;g1971;g2111;g3144;g3343;g3356;g3411;g3427;g3453;g3482;g4067;g5113;g5752;g6074;g6670;g6924;g6990;g7781;g8607;g8732;g9218;g10012;g10255;g588;g1291;g1309;g1985;g4807;g4829;g7940
381	GO:0001701	in utero embryonic development	24 (2.67%)	116 (1.42%)	0.001585	0.032878	g1107;g2781;g2929;g3456;g3945;g4545;g4680;g5132;g5818;g6327;g6385;g6670;g6800;g6982;g7877;g8801;g9675;g10070;g10638;g6028;g6035;g6836;g7029;g10464
382	GO:0031047	gene silencing by RNA	24 (2.67%)	116 (1.42%)	0.001585	0.032878	g294;g1889;g2661;g3125;g3356;g3411;g3945;g4517;g5027;g5763;g5862;g5953;g6074;g6670;g6842;g6924;g7866;g8384;g8873;g9612;g10226;g10264;g10553;g8574
383	GO:1990138	neuron projection extension	24 (2.67%)	116 (1.42%)	0.001585	0.032878	g63;g527;g563;g1717;g2364;g3117;g3909;g3938;g4374;g4601;g5251;g5862;g6032;g6122;g6273;g6815;g8365;g8548;g9548;g10052;g1555;g5335;g6308;g9203
384	GO:0007059	chromosome segregation	83 (9.22%)	552 (6.75%)	0.001592	0.032936	g201;g316;g496;g522;g618;g728;g749;g789;g1192;g1464;g1588;g1600;g2368;g2392;g2929;g2976;g3094;g3335;g3445;g3453;g3537;g4174;g4215;g4316;g4374;g4738;g4805;g5132;g5275;g5621;g5622;g5650;g5730;g5871;g6170;g6203;g6284;g6285;g6327;g6379;g6523;g6572;g6780;g6807;g6870;g7866;g7949;g8065;g8362;g8390;g8548;g8568;g8576;g8657;g8735;g8822;g9113;g9283;g9853;g10450;g1219;g2854;g3182;g3202;g4974;g7227;g7979;g199…
385	GO:0010562	positive regulation of phosphorus metabolic process	55 (6.11%)	337 (4.12%)	0.001615	0.033226	g496;g1008;g1221;g1278;g1600;g1881;g2013;g2067;g2670;g3117;g3384;g3482;g3537;g3701;g3938;g3952;g4805;g5651;g6018;g6032;g6285;g6327;g6681;g6899;g6982;g7319;g7635;g7877;g8607;g8801;g9805;g9994;g10070;g10553;g10638;g1255;g2854;g3202;g5026;g7686;g1256;g1337;g1849;g1955;g2698;g3311;g4341;g4739;g6308;g6754;g7939;g7984;g9203;g9995;g10390
386	GO:0045937	positive regulation of phosphate metabolic process	55 (6.11%)	337 (4.12%)	0.001615	0.033226	g496;g1008;g1221;g1278;g1600;g1881;g2013;g2067;g2670;g3117;g3384;g3482;g3537;g3701;g3938;g3952;g4805;g5651;g6018;g6032;g6285;g6327;g6681;g6899;g6982;g7319;g7635;g7877;g8607;g8801;g9805;g9994;g10070;g10553;g10638;g1255;g2854;g3202;g5026;g7686;g1256;g1337;g1849;g1955;g2698;g3311;g4341;g4739;g6308;g6754;g7939;g7984;g9203;g9995;g10390
387	GO:0009896	positive regulation of catabolic process	44 (4.89%)	256 (3.13%)	0.001655	0.033929	g496;g765;g1588;g2249;g2763;g2980;g3090;g3411;g3627;g3882;g3945;g4433;g5651;g6032;g6170;g6203;g6470;g6842;g7290;g7319;g7877;g8525;g8607;g8640;g9612;g9791;g9853;g9869;g10070;g10112;g10128;g10255;g10264;g1219;g1834;g1226;g2937;g4739;g6754;g7475;g8495;g9022;g9203;g9854
388	GO:0097352	autophagosome maturation	10 (1.11%)	32 (0.39%)	0.001658	0.033929	g615;g2249;g5089;g6093;g6944;g7629;g8525;g8607;g8778;g8495
389	GO:0060249	anatomical structure homeostasis	47 (5.22%)	278 (3.4%)	0.001662	0.033929	g1008;g1464;g1495;g1713;g1761;g2013;g2679;g2929;g3411;g4592;g5118;g5251;g5747;g6018;g6074;g6170;g6720;g6842;g7576;g8299;g8362;g8657;g8727;g9793;g10128;g10255;g10450;g10599;g1255;g5563;g7795;g7979;g8068;g654;g1256;g1337;g3311;g3885;g4341;g4793;g6204;g6416;g6816;g9203;g10153;g10537;g10649
390	GO:0090329	regulation of DNA-dependent DNA replication	21 (2.33%)	97 (1.19%)	0.001686	0.034328	g198;g496;g2929;g3310;g3486;g3537;g5356;g5467;g6170;g6621;g6899;g6919;g8362;g8607;g8657;g8727;g3202;g5563;g7475;g8567;g8941
391	GO:0032210	regulation of telomere maintenance via telomerase	9 (1%)	27 (0.33%)	0.001698	0.034493	g1464;g1761;g6074;g6842;g8362;g8068;g6204;g10537;g10649
392	GO:0019954	asexual reproduction	37 (4.11%)	206 (2.52%)	0.00171	0.034657	g103;g657;g806;g807;g932;g1221;g1500;g1691;g1878;g2625;g3310;g3526;g3952;g4777;g5340;g5467;g5485;g5650;g5651;g6759;g6899;g8972;g10144;g3525;g7983;g9803;g1309;g1555;g1718;g3311;g3885;g5160;g5335;g5399;g6204;g9022;g9203
393	GO:0048513	animal organ development	232 (25.78%)	1788 (21.86%)	0.001727	0.034899	g103;g496;g527;g563;g624;g655;g710;g749;g765;g789;g806;g807;g929;g1015;g1107;g1192;g1278;g1398;g1462;g1480;g1493;g1554;g1588;g1631;g1637;g1691;g1717;g1935;g1948;g1971;g1991;g2013;g2028;g2295;g2376;g2473;g2670;g2707;g2763;g2781;g2882;g2929;g2967;g2976;g3090;g3094;g3117;g3216;g3260;g3310;g3318;g3375;g3384;g3396;g3410;g3411;g3422;g3427;g3447;g3696;g3831;g3875;g3882;g3898;g3952;g4174;g4301;g4340;g437…
394	GO:0007389	pattern specification process	89 (9.89%)	601 (7.35%)	0.001742	0.035112	g103;g749;g1015;g1192;g1217;g1691;g1948;g1991;g2473;g2781;g2882;g3090;g3094;g3216;g3396;g3444;g3447;g3831;g3898;g4067;g4205;g4301;g4374;g4738;g4897;g5113;g5126;g5356;g5429;g5485;g5793;g5953;g6122;g6273;g6385;g6470;g6924;g6979;g6990;g7391;g7705;g8196;g8365;g8638;g8801;g8822;g9011;g9231;g9254;g9548;g9675;g9779;g9853;g9994;g10070;g10226;g10599;g10650;g1288;g5563;g7227;g9123;g654;g1194;g1287;g1632;g3…
395	GO:1902531	regulation of intracellular signal transduction	96 (10.67%)	657 (8.03%)	0.001776	0.035721	g496;g527;g624;g710;g789;g1398;g1600;g1890;g1991;g2013;g2028;g2249;g2295;g2670;g2733;g2865;g2967;g3117;g3375;g3384;g3429;g3455;g3627;g3701;g3800;g3831;g3898;g3909;g3938;g4301;g4545;g4576;g4584;g4805;g5356;g5375;g5393;g5466;g5485;g5651;g5862;g6015;g6018;g6032;g6899;g6982;g7315;g7635;g7687;g7877;g8229;g8362;g8496;g8503;g8657;g9820;g9994;g10070;g10246;g10601;g10638;g526;g1255;g2854;g3141;g5026;g7686…
396	GO:0018205	peptidyl-lysine modification	39 (4.33%)	221 (2.7%)	0.00182	0.036513	g1588;g2249;g2376;g2929;g3875;g3882;g5356;g5953;g6032;g6170;g6295;g6422;g6759;g6919;g7283;g7319;g7687;g7781;g8508;g8657;g8727;g8735;g9206;g9254;g9612;g9675;g10009;g10070;g10447;g5026;g1170;g1955;g4807;g6770;g7475;g7915;g8038;g8380;g9109
397	GO:0009791	post-embryonic development	118 (13.11%)	835 (10.21%)	0.001845	0.036905	g384;g496;g527;g624;g1008;g1015;g1192;g1278;g1462;g1480;g1637;g1691;g1948;g1991;g2028;g2295;g2368;g2376;g2473;g2679;g2882;g3090;g3117;g3312;g3356;g3384;g3396;g3422;g3511;g3875;g3945;g3952;g4205;g4301;g4517;g4576;g4601;g4842;g4897;g4973;g5126;g5356;g5429;g5485;g5621;g5622;g5651;g5763;g5793;g5953;g6029;g6093;g6295;g6345;g6470;g6511;g6759;g6776;g6780;g6842;g6870;g6899;g6919;g6924;g6979;g7635;g7705;g…
398	GO:0031401	positive regulation of protein modification process	68 (7.56%)	438 (5.36%)	0.001851	0.036934	g496;g1278;g1335;g1398;g1600;g1881;g2028;g2067;g2670;g3090;g3117;g3384;g3482;g3537;g3701;g3882;g3938;g3952;g4805;g5651;g6018;g6032;g6285;g6327;g6899;g6919;g6982;g7283;g7319;g7635;g7877;g8496;g8607;g8727;g8801;g9612;g9675;g9805;g9869;g9994;g10070;g10112;g10553;g10638;g1255;g1310;g1834;g2854;g3202;g5026;g7686;g1194;g1256;g1849;g1955;g2698;g3311;g4341;g4739;g4829;g6308;g6754;g7939;g7984;g9203;g9807;…
399	GO:0008298	intracellular mRNA localization	19 (2.11%)	85 (1.04%)	0.00186	0.036938	g103;g749;g3094;g3411;g3444;g4067;g4738;g5113;g7391;g8638;g9231;g9793;g1288;g7227;g1287;g4841;g5674;g9203;g10537
400	GO:0046328	regulation of JNK cascade	19 (2.11%)	85 (1.04%)	0.00186	0.036938	g1600;g1890;g2865;g3117;g3701;g3800;g6018;g6032;g8657;g9994;g7686;g4169;g4329;g4739;g7939;g7984;g9022;g9203;g9995
401	GO:0006611	protein export from nucleus	30 (3.33%)	158 (1.93%)	0.001888	0.037338	g1015;g1761;g1971;g2111;g3144;g3343;g3356;g3411;g3427;g3453;g3482;g4067;g5113;g5752;g6074;g6670;g6924;g6990;g7781;g8607;g8732;g10012;g10255;g588;g1291;g1309;g1985;g4807;g4829;g7940
402	GO:0060627	regulation of vesicle-mediated transport	45 (5%)	265 (3.24%)	0.00189	0.037338	g63;g103;g384;g765;g1631;g1794;g1965;g2368;g2670;g2882;g2980;g3312;g3339;g3455;g3478;g3875;g4205;g4989;g5089;g5375;g5485;g5650;g5651;g5730;g6470;g6815;g7290;g8229;g8496;g8525;g8548;g8778;g9021;g9779;g9820;g10270;g7227;g591;g3408;g4739;g6308;g6415;g6770;g7984;g10269
403	GO:0050793	regulation of developmental process	172 (19.11%)	1282 (15.68%)	0.001895	0.037353	g63;g294;g496;g527;g657;g710;g719;g749;g765;g929;g1192;g1221;g1398;g1588;g1631;g1717;g1758;g1935;g1948;g1965;g1991;g2013;g2376;g2670;g2707;g2882;g2929;g3094;g3117;g3260;g3312;g3375;g3384;g3396;g3407;g3453;g3529;g3696;g3898;g3909;g3938;g3945;g3952;g4204;g4301;g4433;g4517;g4680;g4733;g4777;g4792;g4805;g4842;g4952;g5089;g5251;g5340;g5356;g5429;g5485;g5651;g5763;g5862;g5953;g6032;g6093;g6102;g6122;g6…
404	GO:0048675	axon extension	21 (2.33%)	98 (1.2%)	0.001929	0.037918	g63;g527;g563;g1717;g2364;g3117;g3909;g3938;g4374;g4601;g5251;g5862;g6122;g6273;g8365;g8548;g9548;g10052;g1555;g5335;g6308
405	GO:0006303	double-strand break repair via nonhomologous end joining	14 (1.56%)	55 (0.67%)	0.001995	0.039118	g3407;g6203;g6815;g7748;g7866;g7877;g8362;g8727;g10255;g10666;g5563;g6066;g5794;g6067
406	GO:0044249	cellular biosynthetic process	472 (52.44%)	3915 (47.87%)	0.002027	0.039552	g69;g73;g95;g103;g175;g198;g213;g294;g384;g496;g579;g580;g624;g655;g710;g719;g728;g753;g765;g789;g807;g829;g955;g1008;g1088;g1107;g1217;g1221;g1278;g1292;g1365;g1380;g1398;g1462;g1464;g1499;g1500;g1691;g1713;g1716;g1717;g1742;g1761;g1877;g1881;g1890;g1893;g1911;g1935;g1938;g1948;g1991;g2004;g2013;g2025;g2028;g2067;g2111;g2206;g2249;g2251;g2270;g2318;g2376;g2473;g2521;g2623;g2625;g2661;g2670;g2679…
407	GO:0000726	non-recombinational repair	15 (1.67%)	61 (0.75%)	0.002029	0.039552	g3407;g6203;g6815;g7748;g7866;g7877;g8362;g8727;g10255;g10666;g5563;g6028;g6066;g5794;g6067
408	GO:0033314	mitotic DNA replication checkpoint	7 (0.78%)	18 (0.22%)	0.002037	0.039552	g3407;g3537;g7866;g8362;g1255;g3202;g1256
409	GO:0051567	histone H3-K9 methylation	7 (0.78%)	18 (0.22%)	0.002037	0.039552	g7283;g8657;g8727;g9206;g9675;g5026;g7475
410	GO:0006796	phosphate-containing compound metabolic process	207 (23%)	1580 (19.32%)	0.00205	0.039724	g63;g99;g384;g496;g514;g527;g563;g710;g765;g789;g829;g932;g1008;g1107;g1192;g1221;g1278;g1362;g1380;g1600;g1637;g1761;g1881;g1890;g1935;g2004;g2013;g2028;g2067;g2368;g2625;g2670;g2723;g2865;g2882;g3074;g3117;g3281;g3318;g3344;g3377;g3384;g3407;g3455;g3456;g3482;g3486;g3537;g3564;g3701;g3800;g3882;g3909;g3938;g3952;g4301;g4592;g4680;g4805;g4844;g4897;g4952;g4989;g5025;g5268;g5608;g5651;g5730;g5747…
411	GO:0032103	positive regulation of response to external stimulus	29 (3.22%)	152 (1.86%)	0.002067	0.039947	g73;g765;g2249;g2742;g2763;g2980;g3117;g3384;g3627;g3938;g5429;g5651;g6032;g6122;g6899;g7319;g9548;g9994;g654;g1902;g2937;g3477;g4739;g5616;g5785;g7475;g8495;g9203;g9995
412	GO:0034641	cellular nitrogen compound metabolic process	507 (56.33%)	4235 (51.79%)	0.002098	0.040451	g41;g73;g95;g198;g201;g294;g496;g497;g579;g580;g655;g657;g710;g719;g728;g749;g753;g765;g789;g829;g873;g945;g955;g981;g1008;g1107;g1217;g1221;g1278;g1292;g1365;g1380;g1398;g1462;g1464;g1499;g1500;g1524;g1588;g1637;g1691;g1713;g1716;g1717;g1742;g1752;g1758;g1761;g1819;g1877;g1881;g1889;g1890;g1893;g1911;g1938;g1948;g1964;g1991;g2004;g2013;g2028;g2050;g2067;g2111;g2206;g2249;g2251;g2270;g2318;g2376;…
413	GO:0061640	cytoskeleton-dependent cytokinesis	32 (3.56%)	173 (2.12%)	0.002108	0.040536	g103;g201;g753;g1192;g1493;g1758;g1794;g2388;g2670;g2929;g3422;g3478;g4738;g4805;g5554;g5651;g6007;g6029;g6303;g6379;g7576;g8008;g8081;g9167;g9173;g10447;g1888;g4169;g4329;g7984;g9203;g10269
414	GO:0014823	response to activity	10 (1.11%)	33 (0.4%)	0.002148	0.04121	g3384;g5356;g5651;g6755;g7877;g8959;g10006;g3141;g5563;g3311
415	GO:0007165	signal transduction	287 (31.89%)	2271 (27.77%)	0.002153	0.04121	g63;g73;g103;g198;g384;g496;g527;g563;g580;g587;g624;g710;g765;g771;g789;g929;g1008;g1015;g1107;g1192;g1217;g1221;g1335;g1362;g1380;g1398;g1588;g1600;g1691;g1716;g1819;g1845;g1881;g1890;g1935;g1948;g1965;g1991;g2013;g2028;g2067;g2249;g2270;g2295;g2368;g2388;g2670;g2674;g2707;g2724;g2733;g2742;g2865;g2882;g2929;g2967;g2980;g3074;g3090;g3117;g3118;g3135;g3281;g3339;g3344;g3356;g3375;g3376;g3377;g33…
416	GO:0030261	chromosome condensation	47 (5.22%)	282 (3.45%)	0.00224	0.042766	g316;g522;g749;g1192;g1600;g2368;g2376;g2392;g2976;g3094;g3335;g3445;g3453;g4215;g4316;g4565;g5871;g6284;g6327;g6523;g6572;g6780;g6807;g6870;g7949;g8065;g8362;g8390;g8548;g8568;g8576;g8822;g9113;g9793;g10450;g7227;g7979;g1048;g1987;g3207;g3408;g3621;g7475;g8430;g8574;g9639;g10302
417	GO:1903146	regulation of mitophagy	8 (0.89%)	23 (0.28%)	0.002253	0.04291	g496;g1221;g4993;g6032;g7319;g3141;g4994;g8495
418	GO:0000186	activation of MAPKK activity	6 (0.67%)	14 (0.17%)	0.002406	0.045132	g3117;g3938;g6018;g9994;g10638;g9995
419	GO:0006336	DNA replication-independent nucleosome assembly	6 (0.67%)	14 (0.17%)	0.002406	0.045132	g3853;g6755;g6759;g7866;g8657;g8574
420	GO:0019432	triglyceride biosynthetic process	6 (0.67%)	14 (0.17%)	0.002406	0.045132	g496;g6681;g10006;g6754;g7727;g9957
421	GO:0045738	negative regulation of DNA repair	6 (0.67%)	14 (0.17%)	0.002406	0.045132	g3407;g3422;g4433;g7748;g7877;g8727
422	GO:0050931	pigment cell differentiation	6 (0.67%)	14 (0.17%)	0.002406	0.045132	g1948;g4301;g6102;g8778;g9021;g3141
423	GO:1903391	regulation of adherens junction organization	6 (0.67%)	14 (0.17%)	0.002406	0.045132	g2206;g3455;g5651;g6511;g10536;g7015
424	GO:0001934	positive regulation of protein phosphorylation	47 (5.22%)	283 (3.46%)	0.002409	0.045132	g496;g1278;g1600;g1881;g2067;g2670;g3117;g3384;g3537;g3701;g3938;g3952;g4805;g5651;g6018;g6032;g6285;g6327;g6899;g6982;g7319;g7635;g7877;g8801;g9805;g9994;g10070;g10553;g10638;g1255;g2854;g3202;g5026;g7686;g1256;g1849;g1955;g2698;g3311;g4341;g4739;g6308;g7939;g7984;g9203;g9995;g10390
425	GO:0007178	transmembrane receptor protein serine/threonine kinase signaling pathway	27 (3%)	140 (1.71%)	0.002472	0.046187	g1398;g1935;g2707;g2882;g3344;g4374;g6093;g6122;g6470;g6899;g7809;g7949;g7951;g8365;g8732;g8801;g9318;g9612;g10070;g1310;g654;g1265;g1955;g3423;g7727;g8430;g9203
426	GO:0016574	histone ubiquitination	11 (1.22%)	39 (0.48%)	0.002477	0.046187	g2473;g2781;g3422;g4433;g6340;g6815;g7748;g8503;g8525;g2937;g4862
427	GO:0031581	hemidesmosome assembly	5 (0.56%)	10 (0.12%)	0.002503	0.04627	g5132;g6340;g7635;g10553;g10599
428	GO:0055089	fatty acid homeostasis	5 (0.56%)	10 (0.12%)	0.002503	0.04627	g1221;g1713;g2295;g4844;g10006
429	GO:0070076	histone lysine demethylation	5 (0.56%)	10 (0.12%)	0.002503	0.04627	g579;g580;g2376;g2473;g9272
430	GO:0007254	JNK cascade	21 (2.33%)	100 (1.22%)	0.002505	0.04627	g1600;g1890;g2865;g3117;g3701;g3800;g6018;g6032;g7635;g8657;g9994;g7686;g4169;g4329;g4739;g5335;g7939;g7984;g9022;g9203;g9995
431	GO:0023052	signaling	313 (34.78%)	2506 (30.64%)	0.002641	0.048677	g63;g73;g103;g198;g384;g496;g509;g527;g563;g580;g587;g624;g710;g749;g765;g771;g789;g929;g1008;g1015;g1107;g1192;g1217;g1221;g1335;g1362;g1380;g1398;g1495;g1588;g1600;g1691;g1716;g1819;g1845;g1881;g1890;g1903;g1935;g1948;g1965;g1991;g2013;g2028;g2067;g2247;g2249;g2270;g2295;g2364;g2368;g2388;g2670;g2674;g2693;g2707;g2724;g2733;g2742;g2865;g2882;g2929;g2967;g2980;g3074;g3090;g3117;g3118;g3135;g3281…
